# Supplementary material for: The acute transcriptional response to resistance exercise: impact of age and contraction mode
Source: Aging (Albany NY). 2019 Apr 15;11(7):2111–26. doi: 10.18632/aging.101904 (PMC6503873; doi:10.18632/aging.101904)
Supplement: Supplementary Table S1 [file aging-11-101904-s002.xlsx]

## Sheet: BL.Y vs BL.O
All differentially expressed genes						Up-regulated genes						Down-regulated genes
Gene	logFC	logCPM	PValue	FDR		Gene	logFC	logCPM	PValue	FDR		Gene	logFC	logCPM	PValue	FDR
LINC01128	-0.75478	5.3537	0.000471065	0.0135376		ICMT	0.698917	6.44943	0.00196391	0.032323		LINC01128	-0.75478	5.3537	0.000471065	0.0135376
ICMT	0.698917	6.44943	0.00196391	0.032323		RERE	0.614142	7.28954	0.0017336	0.0298152		CTNNBIP1	-0.632697	5.22914	5.1915e-05	0.00342794
RERE	0.614142	7.28954	0.0017336	0.0298152		SPSB1	0.752289	4.29987	0.00167003	0.0291743		CAMK2N1	-0.781049	2.55964	0.00156391	0.0280627
SPSB1	0.752289	4.29987	0.00167003	0.0291743		UBE4B	0.590834	5.87703	0.0022069	0.0343755		ID3	-0.644687	4.15918	0.000496266	0.0138906
CTNNBIP1	-0.632697	5.22914	5.1915e-05	0.00342794		C1orf127	0.85567	4.8267	0.000413306	0.012358		C1orf63	-0.865892	4.63296	0.000667291	0.016413
UBE4B	0.590834	5.87703	0.0022069	0.0343755		PADI2	0.878895	8.82744	1.45467e-05	0.00152615		LOC646471	-0.914032	2.23734	0.0014034	0.0263216
C1orf127	0.85567	4.8267	0.000413306	0.012358		ALDH4A1	0.679437	7.02476	0.00255798	0.0376292		IFI6	-0.885322	3.25112	0.00257085	0.037673
PADI2	0.878895	8.82744	1.45467e-05	0.00152615		LOC100506730	0.807074	2.05176	0.00105584	0.0218515		AK2	-0.491395	5.78899	0.000463724	0.013431
ALDH4A1	0.679437	7.02476	0.00255798	0.0376292		EIF4G3	0.620147	6.44543	0.000267567	0.00960907		ZMYM1	-0.882041	1.90491	0.0003254	0.0104932
LOC100506730	0.807074	2.05176	0.00105584	0.0218515		EXTL1	1.42062	4.76877	2.95773e-05	0.00256329		C1orf122	-0.541919	4.72072	0.00248056	0.0370347
CAMK2N1	-0.781049	2.55964	0.00156391	0.0280627		RNF19B	0.637192	3.71607	0.00068069	0.0165761		TIE1	-0.974961	4.30539	5.63332e-06	0.000777998
EIF4G3	0.620147	6.44543	0.000267567	0.00960907		C1orf216	0.528138	4.15935	0.00284444	0.0399372		MYSM1	-1.29504	4.86468	1.38485e-07	6.14484e-05
ID3	-0.644687	4.15918	0.000496266	0.0138906		DHCR24	1.10087	6.58245	5.5568e-05	0.00358381		SRSF11	-0.727222	6.11957	0.000509763	0.01416
C1orf63	-0.865892	4.63296	0.000667291	0.016413		CELSR2	0.816815	5.00549	0.00150203	0.0273597		IFI44L	-1.68006	3.4718	3.1625e-06	0.000556653
LOC646471	-0.914032	2.23734	0.0014034	0.0263216		KCNC4	1.36438	3.23753	1.95417e-05	0.00186361		ELTD1	-1.0513	4.1873	2.86086e-05	0.0025187
EXTL1	1.42062	4.76877	2.95773e-05	0.00256329		CASQ2	0.697094	7.5298	0.00371302	0.0462793		C1orf52	-0.620586	3.58299	0.000176977	0.00746468
IFI6	-0.885322	3.25112	0.00257085	0.037673		RNF115	0.499546	5.97412	0.000521776	0.0143223		GBP4	-1.10036	4.09763	0.00302877	0.041685
RNF19B	0.637192	3.71607	0.00068069	0.0165761		ADAMTSL4	0.983035	6.21116	0.0013616	0.0257752		LRRC8C	-0.915766	3.5578	0.00134151	0.0255024
AK2	-0.491395	5.78899	0.000463724	0.013431		SEMA6C	0.663085	9.08412	0.00192677	0.031901		CCDC18	-0.611305	3.11544	0.00362562	0.0458076
ZMYM1	-0.882041	1.90491	0.0003254	0.0104932		PBXIP1	0.517309	7.26932	0.000553443	0.0146874		ARHGAP29	-1.00254	5.40208	4.81598e-05	0.00335998
C1orf216	0.528138	4.15935	0.00284444	0.0399372		UBQLN4	0.593632	5.48694	0.000619401	0.0156619		S1PR1	-1.02042	4.68273	1.06485e-08	8.43744e-06
C1orf122	-0.541919	4.72072	0.00248056	0.0370347		NES	1.06452	6.32966	1.87852e-05	0.00184911		RNPC3	-0.960562	3.80692	0.000189173	0.00774352
TIE1	-0.974961	4.30539	5.63332e-06	0.000777998		PBX1	0.438329	5.93925	0.00359857	0.0456738		PRPF38B	-0.50062	4.29096	0.00235784	0.0357315
DHCR24	1.10087	6.58245	5.5568e-05	0.00358381		DUSP27	0.68186	7.08718	0.00185425	0.0310713		AHCYL1	-0.490637	6.63015	0.00388065	0.0473958
MYSM1	-1.29504	4.86468	1.38485e-07	6.14484e-05		PRG4	1.98263	2.6676	6.49569e-05	0.00394965		LRIG2	-0.751522	3.38532	0.00129909	0.0248462
SRSF11	-0.727222	6.11957	0.000509763	0.01416		CACNA1S	0.649607	9.3692	0.00087403	0.0195476		SIKE1	-0.51209	4.25406	0.00114058	0.0230044
IFI44L	-1.68006	3.4718	3.1625e-06	0.000556653		PFKFB2	0.994424	5.84778	0.00211646	0.0336128		C1orf54	-1.08531	2.07248	0.000302837	0.0101212
ELTD1	-1.0513	4.1873	2.86086e-05	0.0025187		WNT9A	1.07022	2.35978	0.000146839	0.00667578		SHE	-1.18535	3.55716	3.39303e-06	0.000567473
C1orf52	-0.620586	3.58299	0.000176977	0.00746468		EGLN1	0.553364	8.26775	0.00128538	0.0246264		EFNA1	-1.17227	2.76146	3.87564e-06	0.00062308
GBP4	-1.10036	4.09763	0.00302877	0.041685		CCDC3	1.17592	4.50895	7.51836e-05	0.00434381		PEAR1	-1.01557	3.53007	0.000270695	0.00965536
LRRC8C	-0.915766	3.5578	0.00134151	0.0255024		PARD3	0.482447	5.78808	0.00259346	0.0378543		F11R	-0.828569	3.10326	0.00112406	0.0228374
CCDC18	-0.611305	3.11544	0.00362562	0.0458076		C10orf71	0.958604	9.1375	0.00317363	0.0425696		RGS5	-0.987464	8.43595	5.6444e-05	0.00361927
ARHGAP29	-1.00254	5.40208	4.81598e-05	0.00335998		LDB3	0.588624	11.6789	0.00360918	0.0457562		POU2F1	-0.791943	3.57497	0.000105977	0.00544259
S1PR1	-1.02042	4.68273	1.06485e-08	8.43744e-06		ANKRD2	1.94138	7.63408	1.50576e-05	0.00156107		FMO2	-1.21698	5.5111	3.42578e-06	0.000567473
RNPC3	-0.960562	3.80692	0.000189173	0.00774352		LOXL4	1.11926	2.44084	4.52243e-05	0.00330048		MRPS14	-0.526232	3.8831	0.00264258	0.0383693
PRPF38B	-0.50062	4.29096	0.00235784	0.0357315		NFKB2	0.703675	3.38181	0.000179273	0.00750442		LOC730102	-0.762868	2.94193	0.00218167	0.0341484
CELSR2	0.816815	5.00549	0.00150203	0.0273597		GPAM	0.542106	4.91328	0.00162429	0.0286915		EDEM3	-0.530835	4.80944	0.00112902	0.0228963
AHCYL1	-0.490637	6.63015	0.00388065	0.0473958		RNH1	0.504857	6.32603	0.00234725	0.035627		HMCN1	-1.13982	4.09467	0.00193514	0.0319918
KCNC4	1.36438	3.23753	1.95417e-05	0.00186361		NUP98	0.448063	6.08287	0.00252012	0.0374741		MIR4426	-0.510154	4.78108	0.00337043	0.0440899
LRIG2	-0.751522	3.38532	0.00129909	0.0248462		DDB1	0.61473	7.60636	0.00197059	0.032348		ATP2B4	-1.11004	5.88916	3.21156e-06	0.000556653
SIKE1	-0.51209	4.25406	0.00114058	0.0230044		CAPN1	0.527277	6.21915	0.0036488	0.0459161		NFASC	-1.02586	3.39262	0.000336847	0.0107067
CASQ2	0.697094	7.5298	0.00371302	0.0462793		LTBP3	0.519574	6.37557	0.00185319	0.0310713		CD46	-0.574006	6.15381	0.000671718	0.0164489
RNF115	0.499546	5.97412	0.000521776	0.0143223		PACS1	0.628104	5.00332	0.000540927	0.0145083		LOC101929385	-1.27014	3.0633	0.00022682	0.0089861
C1orf54	-1.08531	2.07248	0.000302837	0.0101212		KLC2	0.799177	5.046	0.000357075	0.0111894		C1orf115	-0.681971	3.84829	0.000536404	0.0145083
ADAMTSL4	0.983035	6.21116	0.0013616	0.0257752		RIN1	1.23488	1.912	3.4316e-06	0.000567473		LBR	-0.806674	3.92204	0.000140112	0.00639615
SEMA6C	0.663085	9.08412	0.00192677	0.031901		DPP3	0.812412	3.49597	0.00317168	0.0425696		TMEM63A	-0.748657	4.03876	0.000965246	0.0207108
SHE	-1.18535	3.55716	3.39303e-06	0.000567473		CTSF	0.572366	6.38576	0.00333411	0.043742		C1orf95	-0.856417	3.21668	0.00149627	0.027314
PBXIP1	0.517309	7.26932	0.000553443	0.0146874		PC	0.618773	4.17457	0.00205423	0.0330098		ITPKB	-0.963627	4.47956	3.748e-05	0.00296975
EFNA1	-1.17227	2.76146	3.87564e-06	0.00062308		LRFN4	0.812249	3.10336	0.00315371	0.0424727		TARBP1	-0.723371	4.53867	1.45833e-05	0.00152615
UBQLN4	0.593632	5.48694	0.000619401	0.0156619		KDM2A	0.475513	6.50633	0.00425573	0.0498748		AKT3	-0.758779	4.00877	0.00364412	0.0459161
NES	1.06452	6.32966	1.87852e-05	0.00184911		AMOTL1	0.626843	7.21805	0.00231047	0.0353292		ADSS	-0.776016	2.72383	0.00111594	0.0227977
PEAR1	-1.01557	3.53007	0.000270695	0.00965536		NCAM1	1.48198	4.22463	0.00018048	0.00752654		HNRNPU-AS1	-1.68316	4.27314	4.62516e-06	0.000675091
F11R	-0.828569	3.10326	0.00112406	0.0228374		NNMT	1.54799	2.88221	5.26821e-05	0.003458		ITIH5	-0.645066	5.37692	0.00163052	0.0287558
RGS5	-0.987464	8.43595	5.6444e-05	0.00361927		RNF214	0.528302	3.6302	0.00253761	0.0375692		FAM171A1	-0.701028	3.27559	0.00232431	0.0354656
PBX1	0.438329	5.93925	0.00359857	0.0456738		PKNOX2	0.535687	4.18111	0.0017055	0.029515		KIAA1462	-1.23403	5.41789	1.34573e-05	0.00147804
DUSP27	0.68186	7.08718	0.00185425	0.0310713		DCPS	0.600342	3.11435	0.00292483	0.0405565		NRP1	-0.812731	6.04568	0.000138763	0.00636074
POU2F1	-0.791943	3.57497	0.000105977	0.00544259		NINJ2	1.29677	2.55682	4.77505e-06	0.00068449		ZNF37BP	-1.11749	2.39171	0.00123011	0.0238978
FMO2	-1.21698	5.5111	3.42578e-06	0.000567473		USP5	0.575399	5.95938	0.000913868	0.02013		RET	-0.994015	3.96545	3.46823e-05	0.00287662
MRPS14	-0.526232	3.8831	0.00264258	0.0383693		FOXJ2	0.564325	5.47101	0.00284133	0.0399372		ZNF32	-0.482783	5.16514	0.00274382	0.0392738
LOC730102	-0.762868	2.94193	0.00218167	0.0341484		BICD1	1.00298	2.65552	0.00423464	0.0498748		C10orf128	-1.00097	2.77012	0.000264245	0.00960907
EDEM3	-0.530835	4.80944	0.00112902	0.0228963		PKP2	1.06902	3.23744	8.24944e-05	0.00452595		AGAP6	-1.20247	2.82314	0.000115996	0.00569643
HMCN1	-1.13982	4.09467	0.00193514	0.0319918		HOXC8	0.717059	3.69065	1.88362e-05	0.00184911		TFAM	-0.448998	4.47225	0.00276643	0.0394448
PRG4	1.98263	2.6676	6.49569e-05	0.00394965		MYL6B	1.31565	8.08042	5.68086e-06	0.000777998		TSPAN15	-0.801203	3.70031	0.00053453	0.0145083
MIR4426	-0.510154	4.78108	0.00337043	0.0440899		NUDT4	0.515366	5.95142	0.00218831	0.0341484		CDH23	-1.42485	2.83775	4.8683e-05	0.00337525
CACNA1S	0.649607	9.3692	0.00087403	0.0195476		C12orf75	1.78301	4.00059	1.12297e-05	0.00131127		TMEM254	-0.762374	1.71284	0.00306893	0.0417958
ATP2B4	-1.11004	5.88916	3.21156e-06	0.000556653		ALDH2	0.566481	7.72069	0.00156573	0.0280627		TSPAN14	-0.58257	4.62456	0.00305468	0.0417824
NFASC	-1.02586	3.39262	0.000336847	0.0107067		MED13L	0.538115	6.52064	0.000296735	0.0100972		MMRN2	-0.755366	5.17058	0.000470401	0.0135376
PFKFB2	0.994424	5.84778	0.00211646	0.0336128		LATS2	0.535317	4.58387	0.00221665	0.0343906		KAZALD1	-0.661699	3.66585	0.00280631	0.0397072
CD46	-0.574006	6.15381	0.000671718	0.0164489		SMAD9	1.22164	2.77629	0.000721813	0.0169822		LBX1-AS1	-0.779913	3.66803	0.00182314	0.0307824
LOC101929385	-1.27014	3.0633	0.00022682	0.0089861		FREM2	0.568875	4.72021	0.00202438	0.0327421		C10orf32	-0.475437	4.11567	0.00345531	0.0446558
C1orf115	-0.681971	3.84829	0.000536404	0.0145083		TSC22D1	0.65382	7.70257	0.0014267	0.0266438		USMG5	-0.956491	5.88033	7.75532e-06	0.00100035
LBR	-0.806674	3.92204	0.000140112	0.00639615		KLF5	1.5073	3.50632	2.85056e-08	1.75674e-05		TRUB1	-0.53957	3.51301	0.00270238	0.0389318
TMEM63A	-0.748657	4.03876	0.000965246	0.0207108		IRS2	1.04755	4.97603	3.31509e-07	0.00011329		GRK5	-0.735214	3.81449	0.00310838	0.0422047
C1orf95	-0.856417	3.21668	0.00149627	0.027314		ATP11A	0.583995	5.6334	0.000870954	0.0195182		WDR11	-0.843571	4.01132	0.00027485	0.00967909
ITPKB	-0.963627	4.47956	3.748e-05	0.00296975		RASA3	0.43482	4.27007	0.0034916	0.0448291		NSMCE4A	-0.61262	3.06432	0.00384241	0.0471502
WNT9A	1.07022	2.35978	0.000146839	0.00667578		NOP9	0.659818	5.48287	0.00307408	0.0417958		EBF3	-1.07063	3.68276	2.73114e-05	0.00245092
EGLN1	0.553364	8.26775	0.00128538	0.0246264		HSPA2	1.22239	7.43058	0.000157134	0.0069939		RPLP2	-0.576926	7.48061	0.00225861	0.0348952
TARBP1	-0.723371	4.53867	1.45833e-05	0.00152615		RAB15	1.1217	2.65764	0.00173068	0.0298113		LOC101927645	-0.893014	2.45633	0.000122374	0.00585126
AKT3	-0.758779	4.00877	0.00364412	0.0459161		SMOC1	0.854543	4.16168	0.00226658	0.0349696		MRPL23-AS1	-0.9866	2.2051	0.000287601	0.00993388
ADSS	-0.776016	2.72383	0.00111594	0.0227977		ALDH6A1	0.667663	5.46611	0.00149706	0.027314		RIC3	-0.728919	2.59745	0.00190176	0.0315812
HNRNPU-AS1	-1.68316	4.27314	4.62516e-06	0.000675091		LOC101928377	0.710953	1.66562	0.0031972	0.0427824		TMEM41B	-0.602294	3.33603	0.00197126	0.032348
ITIH5	-0.645066	5.37692	0.00163052	0.0287558		PTPN21	0.524701	4.60943	0.00377854	0.0466764		RPS13	-0.550804	7.47364	0.00255172	0.037614
CCDC3	1.17592	4.50895	7.51836e-05	0.00434381		ITPK1	0.516032	4.92247	0.00124777	0.0241563		PIK3C2A	-0.815143	4.35077	0.00218511	0.0341484
FAM171A1	-0.701028	3.27559	0.00232431	0.0354656		DYNC1H1	0.613098	7.94085	0.00254615	0.0376091		TSPAN18	-0.706843	4.40621	0.00168906	0.029322
KIAA1462	-1.23403	5.41789	1.34573e-05	0.00147804		C14orf180	1.51758	2.74835	2.74999e-08	1.75674e-05		FNBP4	-0.958938	5.6208	0.000747662	0.0173511
NRP1	-0.812731	6.04568	0.000138763	0.00636074		ZBTB42	0.804398	2.59089	0.00319274	0.0427742		APLNR	-1.08469	4.70744	4.56141e-06	0.000675091
PARD3	0.482447	5.78808	0.00259346	0.0378543		KLF13	0.718726	6.66702	0.000893729	0.0197897		STX3	-0.727908	3.0295	0.000997667	0.0209521
ZNF37BP	-1.11749	2.39171	0.00123011	0.0238978		ACTC1	2.57693	5.78379	1.22623e-09	1.36026e-06		SNHG1	-0.740206	3.25258	0.000738401	0.0171864
RET	-0.994015	3.96545	3.46823e-05	0.00287662		PLA2G4F	0.798735	3.43674	0.0017865	0.0303952		TRPT1	-0.757636	6.05798	0.000213863	0.0086294
ZNF32	-0.482783	5.16514	0.00274382	0.0392738		ZNF106	0.652496	10.9344	0.00174539	0.0299715		NUDT8	-0.583057	4.09936	0.00232992	0.0355024
C10orf128	-1.00097	2.77012	0.000264245	0.00960907		MAP1A	1.74073	3.72	0.000150621	0.00681958		ANO1	-0.856639	3.56922	0.000989358	0.0209516
C10orf71	0.958604	9.1375	0.00317363	0.0425696		UNC13C	2.22393	3.65444	4.10591e-06	0.000650669		PRCP	-0.805482	4.14805	0.000329423	0.0105008
AGAP6	-1.20247	2.82314	0.000115996	0.00569643		TLN2	0.549056	6.17008	0.00201116	0.0327421		TMEM126B	-0.584222	4.33677	0.00326437	0.043439
TFAM	-0.448998	4.47225	0.00276643	0.0394448		MAP2K1	0.477843	5.62181	0.000989554	0.0209516		TMEM126A	-0.680248	4.68358	0.00212136	0.0336175
TSPAN15	-0.801203	3.70031	0.00053453	0.0145083		SMAD3	0.733414	6.62113	1.20393e-06	0.000289198		CREBZF	-0.97552	5.23433	6.33467e-06	0.000846632
CDH23	-1.42485	2.83775	4.8683e-05	0.00337525		CLN6	0.552175	3.8335	0.00421011	0.0497897		FZD4	-0.646448	5.91915	0.00255326	0.037614
TMEM254	-0.762374	1.71284	0.00306893	0.0417958		THSD4	0.838103	2.98366	0.000281552	0.00982155		CCDC82	-0.638784	3.64934	0.00288057	0.0401939
TSPAN14	-0.58257	4.62456	0.00305468	0.0417824		NEO1	0.986714	5.90964	6.33926e-08	3.34864e-05		TMEM123	-0.59826	5.04093	0.00408468	0.0489853
LDB3	0.588624	11.6789	0.00360918	0.0457562		C15orf59	1.02167	1.86831	0.00156593	0.0280627		GUCY1A2	-0.929735	4.20458	0.000739016	0.0171864
MMRN2	-0.755366	5.17058	0.000470401	0.0135376		CSPG4	0.930533	4.27583	5.09479e-05	0.00340813		FXYD6	-0.900736	4.59308	3.48925e-05	0.00287662
ANKRD2	1.94138	7.63408	1.50576e-05	0.00156107		POLG	0.550766	5.47623	0.00355611	0.0452384		UBE4A	-0.509209	5.67901	0.00210138	0.0335404
LOXL4	1.11926	2.44084	4.52243e-05	0.00330048		PLIN1	1.93217	3.3627	0.00178281	0.030379		RPS25	-0.629244	7.68663	0.00288036	0.0401939
KAZALD1	-0.661699	3.66585	0.00280631	0.0397072		DECR2	0.530159	4.80252	0.000560615	0.0147211		ESAM	-0.675131	4.91458	0.000300881	0.0101212
LBX1-AS1	-0.779913	3.66803	0.00182314	0.0307824		RAB11FIP3	0.708445	5.90183	3.69685e-05	0.00296975		MSANTD2	-1.15031	2.41201	4.67309e-05	0.00334324
NFKB2	0.703675	3.38181	0.000179273	0.00750442		PKD1	0.560487	7.52243	0.00366668	0.0459599		ETS1	-0.654274	5.29658	0.00124141	0.0240752
C10orf32	-0.475437	4.11567	0.00345531	0.0446558		ABCA3	0.578665	3.78545	0.00149209	0.0273131		FLI1	-0.869121	3.41671	0.00138371	0.0261045
USMG5	-0.956491	5.88033	7.75532e-06	0.00100035		TBC1D24	0.578715	3.49034	0.00362283	0.0458076		ARHGAP32	-0.693128	3.91648	0.00369444	0.0462034
GPAM	0.542106	4.91328	0.00162429	0.0286915		TRAP1	0.553633	7.17386	0.000778674	0.01781		NRIP2	-1.10293	2.23253	0.000846251	0.0190802
TRUB1	-0.53957	3.51301	0.00270238	0.0389318		RBFOX1	0.440201	6.80975	0.00332676	0.043742		A2M	-0.78372	8.00214	0.000557394	0.0147211
GRK5	-0.735214	3.81449	0.00310838	0.0422047		GTF3C1	0.592928	6.10587	0.00426707	0.0498748		PZP	-0.954134	2.84488	0.000565992	0.014799
WDR11	-0.843571	4.01132	0.00027485	0.00967909		TBC1D10B	0.597665	5.03887	0.000428941	0.0127226		APOLD1	-1.0387	4.20446	0.00118829	0.0235593
NSMCE4A	-0.61262	3.06432	0.00384241	0.0471502		CTF1	0.883625	3.46692	8.98674e-05	0.00483932		C2CD5	-0.7375	4.07095	0.00188654	0.0314225
EBF3	-1.07063	3.68276	2.73114e-05	0.00245092		ARMC5	0.569935	3.59301	0.00312036	0.0423156		ETNK1	-0.64291	3.81475	0.0033318	0.043742
RNH1	0.504857	6.32603	0.00234725	0.035627		ZNF423	0.628702	5.14472	0.000292595	0.0100178		SLC38A1	-1.20724	4.50632	6.06477e-06	0.000820445
RPLP2	-0.576926	7.48061	0.00225861	0.0348952		TPPP3	1.05415	4.41584	8.68199e-06	0.00109442		GRASP	-0.774007	2.25707	0.00172561	0.0297701
LOC101927645	-0.893014	2.45633	0.000122374	0.00585126		AARS	0.650147	5.92929	0.000236026	0.00918679		CSAD	-0.896708	3.13466	0.00148887	0.0273131
MRPL23-AS1	-0.9866	2.2051	0.000287601	0.00993388		ST3GAL2	0.773498	5.65022	4.70158e-05	0.00334324		RBMS2	-0.873207	4.31583	0.000305416	0.0101212
NUP98	0.448063	6.08287	0.00252012	0.0374741		GLG1	0.504611	6.45064	0.00185381	0.0310713		DTX3	-0.882847	3.10215	0.00207042	0.0331895
RIC3	-0.728919	2.59745	0.00190176	0.0315812		FBXO31	0.577946	6.43578	0.0016442	0.0289509		ARHGEF25	-0.790695	2.88538	0.00301599	0.0415608
TMEM41B	-0.602294	3.33603	0.00197126	0.032348		NXN	0.721355	6.67236	0.000274243	0.00967909		AGAP2	-0.83549	3.65885	0.00290601	0.0403964
RPS13	-0.550804	7.47364	0.00255172	0.037614		P2RX5	1.10886	1.77556	0.000100086	0.00521248		AVIL	-0.744616	3.54951	0.000346079	0.0109064
PIK3C2A	-0.815143	4.35077	0.00218511	0.0341484		MYBBP1A	0.796656	5.26514	0.000955387	0.0206189		AVPR1A	-0.936974	2.81906	0.00312933	0.0423854
TSPAN18	-0.706843	4.40621	0.00168906	0.029322		PELP1	0.67268	5.55956	0.0038933	0.0473958		RASSF3	-0.701407	5.25991	0.000598859	0.0153421
FNBP4	-0.958938	5.6208	0.000747662	0.0173511		WSCD1	0.761387	4.81116	0.00205623	0.0330098		IRAK3	-1.14065	2.91843	0.000712613	0.0169312
APLNR	-1.08469	4.70744	4.56141e-06	0.000675091		FXR2	0.580096	6.90086	0.00365588	0.0459161		KCNMB4	-0.985594	2.12224	0.0020248	0.0327421
STX3	-0.727908	3.0295	0.000997667	0.0209521		MYH8	0.695295	8.21847	0.0038575	0.0472519		PTPRB	-1.32632	6.11604	3.90105e-07	0.000118853
DDB1	0.61473	7.60636	0.00197059	0.032348		FOXO3B	0.733221	5.14358	2.41594e-05	0.00223333		TSPAN8	-0.971748	4.95824	0.00221641	0.0343906
SNHG1	-0.740206	3.25258	0.000738401	0.0171864		KCNJ12	0.638903	7.16183	0.00116965	0.0233363		ZDHHC17	-0.55828	4.7261	0.00115917	0.0232557
TRPT1	-0.757636	6.05798	0.000213863	0.0086294		SSH2	0.567049	6.83287	0.00284439	0.0399372		BTG1	-0.54715	4.63602	0.000616982	0.0156619
CAPN1	0.527277	6.21915	0.0036488	0.0459161		CACNB1	0.544218	7.99735	0.0009164	0.02013		NR2C1	-0.765957	4.55625	0.000166996	0.00726587
LTBP3	0.519574	6.37557	0.00185319	0.0310713		ERBB2	1.03213	5.1956	2.81335e-10	6.2417e-07		ELK3	-0.947771	4.00148	4.17289e-05	0.00317054
PACS1	0.628104	5.00332	0.000540927	0.0145083		STAT3	0.629371	6.95401	0.000490274	0.0138445		MTERFD3	-0.705092	3.25762	0.00138083	0.0260947
KLC2	0.799177	5.046	0.000357075	0.0111894		PLCD3	0.843419	7.56785	0.000246471	0.00926899		OAS3	-1.35897	3.19075	6.95185e-05	0.00410196
RIN1	1.23488	1.912	3.4316e-06	0.000567473		KAT7	0.459966	5.20807	0.00280002	0.0397072		OAS2	-1.19771	2.35191	0.000167024	0.00726587
DPP3	0.812412	3.49597	0.00317168	0.0425696		CHAD	1.36928	2.74347	3.59682e-05	0.00291237		VPS37B	-0.821213	3.26676	6.11047e-05	0.00382957
CTSF	0.572366	6.38576	0.00333411	0.043742		AXIN2	0.625629	3.74989	0.00106632	0.0220273		ZNF605	-0.581708	3.64359	0.00230048	0.0352476
PC	0.618773	4.17457	0.00205423	0.0330098		SOX9	1.21983	2.30928	7.93707e-05	0.00446933		SPATA13	-1.03237	2.88423	0.000706878	0.0168996
LRFN4	0.812249	3.10336	0.00315371	0.0424727		HN1	0.571022	5.26719	0.000350278	0.0110074		C1QTNF9	-1.14719	2.26832	0.000462269	0.013431
KDM2A	0.475513	6.50633	0.00425573	0.0498748		40057	0.613388	6.30178	0.00022853	0.00902164		PAN3	-0.97046	3.24107	0.000536113	0.0145083
NUDT8	-0.583057	4.09936	0.00232992	0.0355024		NPLOC4	0.609331	7.39357	0.00329959	0.0435665		FLT1	-1.32118	5.67015	1.5744e-08	1.16432e-05
ANO1	-0.856639	3.56922	0.000989358	0.0209516		FASN	1.11691	3.8588	5.33747e-05	0.00346249		SLC46A3	-0.594996	3.55237	0.000986058	0.0209516
PRCP	-0.805482	4.14805	0.000329423	0.0105008		MYOM1	0.793127	10.2743	0.00339589	0.0442663		STARD13	-0.89442	3.19584	1.63295e-05	0.00164339
TMEM126B	-0.584222	4.33677	0.00326437	0.043439		EPB41L3	1.34737	3.16011	5.81645e-07	0.00015737		LHFP	-0.634732	4.9146	0.00352622	0.0449747
TMEM126A	-0.680248	4.68358	0.00212136	0.0336175		FHOD3	1.03587	6.27246	4.43551e-06	0.000675091		MTRF1	-0.525118	3.43809	0.00187438	0.0313612
CREBZF	-0.97552	5.23433	6.33467e-06	0.000846632		NFATC1	0.66439	5.58539	0.00402528	0.0485353		NAA16	-0.904618	3.47898	0.00017477	0.00741719
FZD4	-0.646448	5.91915	0.00255326	0.037614		STK11	0.614021	6.71575	0.00373025	0.0463325		LRCH1	-1.11817	2.70998	0.000305229	0.0101212
AMOTL1	0.626843	7.21805	0.00231047	0.0353292		NFIC	0.717464	8.24036	0.00414782	0.0494136		LPAR6	-0.933389	3.26479	0.000666258	0.016413
CCDC82	-0.638784	3.64934	0.00288057	0.0401939		FZR1	0.593593	4.52538	0.00110729	0.0227046		DACH1	-1.50623	2.06271	1.64443e-05	0.00164339
TMEM123	-0.59826	5.04093	0.00408468	0.0489853		NMRK2	0.741915	7.05991	0.00220948	0.0343755		COMMD6	-0.785712	3.89413	0.000915073	0.02013
GUCY1A2	-0.929735	4.20458	0.000739016	0.0171864		HDGFRP2	0.521735	5.74513	0.00335823	0.0439821		UGGT2	-0.965852	1.86284	0.000367259	0.0114118
NCAM1	1.48198	4.22463	0.00018048	0.00752654		TICAM1	0.696375	3.31957	0.0007648	0.0176015		DOCK9	-1.01822	5.04001	0.000231905	0.00905816
NNMT	1.54799	2.88221	5.26821e-05	0.003458		PLIN3	0.726157	6.10191	5.3131e-05	0.00346249		METTL21EP	-0.976799	3.92186	0.0028107	0.0397186
RNF214	0.528302	3.6302	0.00253761	0.0375692		SLC44A2	0.645123	7.09343	0.000117595	0.00569643		EFNB2	-0.751203	3.95278	1.24623e-05	0.00141066
FXYD6	-0.900736	4.59308	3.48925e-05	0.00287662		SMARCA4	0.529774	4.96068	0.00424034	0.0498748		ARGLU1	-0.787137	6.29754	0.00059364	0.0152436
UBE4A	-0.509209	5.67901	0.00210138	0.0335404		LPPR2	0.812258	4.87498	8.16501e-05	0.00452595		ABHD13	-0.532342	3.71118	0.00345797	0.0446558
RPS25	-0.629244	7.68663	0.00288036	0.0401939		NACC1	0.670269	4.70728	0.000952939	0.0206061		COL4A1	-0.910287	6.35734	0.000241671	0.00926899
ESAM	-0.675131	4.91458	0.000300881	0.0101212		SAMD1	0.841911	3.50101	4.45103e-05	0.00330048		MCF2L	-0.991081	4.445	0.000386395	0.0117755
MSANTD2	-1.15031	2.41201	4.67309e-05	0.00334324		CD97	0.507149	4.65066	0.00288057	0.0401939		CCNB1IP1	-0.514165	4.89044	0.00188331	0.0314225
PKNOX2	0.535687	4.18111	0.0017055	0.029515		GIPC1	0.588234	5.39903	0.000259962	0.00960168		RNASE1	-0.688789	5.50584	0.00415158	0.0494136
DCPS	0.600342	3.11435	0.00292483	0.0405565		CHERP	0.644404	4.6168	0.00428251	0.0499011		ADCY4	-1.03794	3.61151	0.000284485	0.00989278
ETS1	-0.654274	5.29658	0.00124141	0.0240752		MAST3	1.25625	2.42726	3.93111e-07	0.000118853		STXBP6	-1.24939	2.68238	6.66399e-05	0.00398771
FLI1	-0.869121	3.41671	0.00138371	0.0261045		PIK3R2	0.874343	4.55452	9.37421e-06	0.00115542		G2E3	-0.839424	2.59873	0.000242533	0.00926899
ARHGAP32	-0.693128	3.91648	0.00369444	0.0462034		PGPEP1	0.711489	5.64041	6.69003e-05	0.00398771		CLEC14A	-0.706531	5.23162	0.000292228	0.0100178
NINJ2	1.29677	2.55682	4.77505e-06	0.00068449		ELL	0.577823	4.54216	0.0023874	0.0358369		RPS29	-1.05566	5.88047	0.000338453	0.010727
NRIP2	-1.10293	2.23253	0.000846251	0.0190802		PLEKHF1	0.73804	5.60647	0.0024935	0.0371779		VCPKMT	-0.981316	2.34355	0.00115933	0.0232557
USP5	0.575399	5.95938	0.000913868	0.02013		NUDT19	0.600879	5.12353	0.00258703	0.0378101		NID2	-0.907149	3.32361	0.000189029	0.00774352
FOXJ2	0.564325	5.47101	0.00284133	0.0399372		RGS9BP	0.954777	3.54563	0.000288354	0.00993388		LGALS3	-0.611591	5.24748	0.00388439	0.0473958
A2M	-0.78372	8.00214	0.000557394	0.0147211		CEBPA	0.825612	3.01629	0.000120724	0.00579737		TMEM260	-0.80826	2.20645	0.00365905	0.0459161
PZP	-0.954134	2.84488	0.000565992	0.014799		CEBPA-AS1	0.811758	2.39316	0.00290085	0.0403753		FLJ31306	-0.736756	3.67178	0.00414757	0.0494136
APOLD1	-1.0387	4.20446	0.00118829	0.0235593		RBM42	0.461669	5.19496	0.00425465	0.0498748		TIMM9	-0.564299	3.78244	0.00389042	0.0473958
C2CD5	-0.7375	4.07095	0.00188654	0.0314225		HSPB6	1.03249	10.1727	0.000613468	0.0156619		JKAMP	-0.60735	3.98561	0.00116818	0.0233363
ETNK1	-0.64291	3.81475	0.0033318	0.043742		PRX	1.05921	3.30363	4.992e-05	0.00340813		PRKCH	-0.858285	4.21291	2.22572e-07	8.81782e-05
BICD1	1.00298	2.65552	0.00423464	0.0498748		BCKDHA	0.631347	6.33594	0.000566987	0.014799		RHOJ	-1.20407	3.5103	4.06205e-07	0.000118853
PKP2	1.06902	3.23744	8.24944e-05	0.00452595		DMPK	0.963646	7.53574	1.14346e-05	0.0013213		PLEKHG3	-0.885541	2.83292	0.00144585	0.0268208
SLC38A1	-1.20724	4.50632	6.06477e-06	0.000820445		LIG1	0.629018	2.32284	0.00223482	0.0346241		SRSF5	-1.05074	6.45885	7.78494e-05	0.00442863
GRASP	-0.774007	2.25707	0.00172561	0.0297701		PLEKHA4	1.20094	3.86647	6.4121e-10	8.89118e-07		PGF	-0.765512	2.43207	0.00257648	0.0377056
CSAD	-0.896708	3.13466	0.00148887	0.0273131		PPP1R15A	0.582734	5.49203	0.000310386	0.0101567		SPTLC2	-0.644207	3.79359	0.00160676	0.0286096
HOXC8	0.717059	3.69065	1.88362e-05	0.00184911		CACNG6	0.718809	6.69723	0.000115461	0.00569643		SLIRP	-0.769382	5.27886	0.000308816	0.0101567
MYL6B	1.31565	8.08042	5.68086e-06	0.000777998		TRIM28	0.515833	6.5752	0.00237764	0.0358037		ADCK1	-0.743166	2.81807	0.00280607	0.0397072
RBMS2	-0.873207	4.31583	0.000305416	0.0101212		ROCK2	0.46186	6.96008	0.00268417	0.0388207		NDUFB1	-0.813421	5.69325	8.19733e-05	0.00452595
DTX3	-0.882847	3.10215	0.00207042	0.0331895		RAB10	0.501769	8.66652	0.00348329	0.0447742		IFI27	-0.942707	4.62383	0.000173603	0.00741719
ARHGEF25	-0.790695	2.88538	0.00301599	0.0415608		CRIM1	0.513515	6.133	0.00382956	0.0470447		CLMN	-1.09019	3.75645	0.000452328	0.0132044
AGAP2	-0.83549	3.65885	0.00290601	0.0403964		FEZ2	0.898349	6.91942	1.74234e-07	7.15845e-05		WARS	-0.564306	6.41093	0.00121947	0.0237742
AVIL	-0.744616	3.54951	0.000346079	0.0109064		EFEMP1	0.912238	4.00289	0.00215705	0.0339888		C14orf2	-0.55639	6.53038	0.00212652	0.0336513
AVPR1A	-0.936974	2.81906	0.00312933	0.0423854		SLC1A4	1.02889	6.35137	0.00304522	0.0417824		KIF26A	-0.685344	3.1739	0.00380626	0.0468682
RASSF3	-0.701407	5.25991	0.000598859	0.0153421		ARID5A	0.624511	4.29791	0.000268404	0.00960907		HERC2P2	-0.631244	5.2057	0.00112378	0.0228374
IRAK3	-1.14065	2.91843	0.000712613	0.0169312		LONRF2	0.742458	5.0282	0.00218872	0.0341484		TJP1	-0.906224	5.52487	2.81465e-06	0.000511852
KCNMB4	-0.985594	2.12224	0.0020248	0.0327421		AC079586.1	1.27853	5.58938	0.000131936	0.00614945		GOLGA8O	-0.957407	1.95809	0.0012777	0.0245814
PTPRB	-1.32632	6.11604	3.90105e-07	0.000118853		ARHGEF4	0.675466	3.83599	0.000417797	0.0124253		DLL4	-1.34869	2.98902	1.23212e-07	5.69498e-05
TSPAN8	-0.971748	4.95824	0.00221641	0.0343906		R3HDM1	0.491522	5.20958	0.00326075	0.043439		STARD9	-1.51041	4.13055	4.8079e-05	0.00335998
ZDHHC17	-0.55828	4.7261	0.00115917	0.0232557		LRP1B	1.30621	4.39115	0.00380822	0.0468682		TMOD3	-1.03665	3.62258	0.000157359	0.0069939
BTG1	-0.54715	4.63602	0.000616982	0.0156619		ZNF385B	1.2783	3.23515	0.000358771	0.0111969		ALDH1A2	-0.72798	3.96391	0.00268308	0.0388207
NUDT4	0.515366	5.95142	0.00218831	0.0341484		IGFBP5	0.664395	9.81503	0.000934876	0.0203798		RAB8B	-0.786921	2.92015	0.00365648	0.0459161
NR2C1	-0.765957	4.55625	0.000166996	0.00726587		OBSL1	0.606003	6.55789	0.000712782	0.0169312		FAM96A	-0.604891	4.9958	0.000215232	0.0086294
ELK3	-0.947771	4.00148	4.17289e-05	0.00317054		NCL	0.481691	7.64019	0.00280113	0.0397072		PTPLAD1	-0.65949	3.13767	0.00419381	0.0497029
C12orf75	1.78301	4.00059	1.12297e-05	0.00131127		CHRND	2.25971	5.02471	1.12631e-11	4.16473e-08		GOLGA6L9	-0.848049	2.25434	0.00218309	0.0341484
MTERFD3	-0.705092	3.25762	0.00138083	0.0260947		CHRNG	1.60695	3.43171	0.000443112	0.0129716		RPS17	-0.631008	7.29724	0.00236488	0.0357892
ALDH2	0.566481	7.72069	0.00156573	0.0280627		C20orf26	2.30491	4.21786	1.57444e-12	1.05719e-08		PDE8A	-0.847194	3.33178	0.000722739	0.0169822
OAS3	-1.35897	3.19075	6.95185e-05	0.00410196		ACSS1	0.78636	5.54556	0.0028399	0.0399372		SNRPA1	-0.828576	1.898	0.0038966	0.0473958
OAS2	-1.19771	2.35191	0.000167024	0.00726587		PHF20	0.500461	5.87968	0.000999156	0.0209521		CARHSP1	-0.671217	3.07242	0.00392648	0.0476027
MED13L	0.538115	6.52064	0.000296735	0.0100972		JPH2	0.759902	8.76932	0.00132334	0.025223		MKL2	-0.554824	5.44994	0.00119232	0.0235593
VPS37B	-0.821213	3.26676	6.11047e-05	0.00382957		PCIF1	0.522456	5.35942	0.00103683	0.0215049		RPS15A	-0.765485	7.98791	0.000522899	0.0143223
ZNF605	-0.581708	3.64359	0.00230048	0.0352476		DOK5	0.790868	4.89408	1.1042e-05	0.00130307		ARL6IP1	-0.758203	4.4894	0.00101209	0.0211434
LATS2	0.535317	4.58387	0.00221665	0.0343906		GNAS	0.478977	10.4033	0.00352727	0.0449747		NPIPB5	-0.71892	4.49598	0.00135002	0.0255996
SPATA13	-1.03237	2.88423	0.000706878	0.0168996		SLC2A4RG	0.711551	7.27307	0.000662776	0.0164111		BOLA2B	-0.793931	2.04828	0.00119326	0.0235593
C1QTNF9	-1.14719	2.26832	0.000462269	0.013431		MAP3K7CL	1.44573	4.64888	4.92096e-09	4.19909e-06		NDRG4	-1.06452	3.61464	1.62273e-05	0.00164339
PAN3	-0.97046	3.24107	0.000536113	0.0145083		ITSN1	0.579783	5.20019	0.000959066	0.0206581		CDH5	-0.884117	5.90921	0.000223925	0.00890323
FLT1	-1.32118	5.67015	1.5744e-08	1.16432e-05		MRPS6	0.463388	4.8904	0.00289421	0.0403335		NFAT5	-0.66678	4.81691	0.00238699	0.0358369
SLC46A3	-0.594996	3.55237	0.000986058	0.0209516		DOPEY2	0.586015	5.20113	0.00375147	0.0463935		IST1	-0.40161	5.6448	0.00390126	0.0474005
STARD13	-0.89442	3.19584	1.63295e-05	0.00164339		CHAF1B	0.884558	4.24357	0.00128203	0.0246048		AC137932.6	-0.701451	2.17883	0.00297219	0.0410729
SMAD9	1.22164	2.77629	0.000721813	0.0169822		LSS	0.55198	5.45389	0.00168215	0.0293174		MIR22HG	-0.677816	5.6038	0.000343859	0.0108673
FREM2	0.568875	4.72021	0.00202438	0.0327421		DGCR14	0.598858	3.32986	0.00427126	0.0498748		PLD2	-0.750422	2.47741	0.00237132	0.0357892
LHFP	-0.634732	4.9146	0.00352622	0.0449747		CRKL	0.451797	6.75822	0.00359481	0.0456738		USP6	-1.07594	5.34512	0.000692967	0.016784
MTRF1	-0.525118	3.43809	0.00187438	0.0313612		LARGE	0.776091	5.97374	4.59873e-06	0.000675091		NLRP1	-0.99975	3.42694	0.000622191	0.0156863
NAA16	-0.904618	3.47898	0.00017477	0.00741719		FOXRED2	0.63929	3.24893	0.00402413	0.0485353		XAF1	-1.48129	3.77423	8.62206e-06	0.00109442
TSC22D1	0.65382	7.70257	0.0014267	0.0266438		CYB5R3	0.59158	7.04061	0.00012344	0.00587691		BCL6B	-1.25503	3.55375	1.87786e-06	0.000370256
LRCH1	-1.11817	2.70998	0.000305229	0.0101212		LDOC1L	0.595263	4.93838	0.00369019	0.0462024		ATP1B2	-0.897903	1.99789	0.000305653	0.0101212
LPAR6	-0.933389	3.26479	0.000666258	0.016413		KIAA0930	0.842524	5.62911	2.73969e-05	0.00245092		TMEM88	-0.902352	3.35251	5.079e-05	0.00340813
DACH1	-1.50623	2.06271	1.64443e-05	0.00164339		PLXNB2	0.745207	3.70132	0.00268976	0.038851		ARHGEF15	-0.831759	3.88431	0.000253331	0.0094302
KLF5	1.5073	3.50632	2.85056e-08	1.75674e-05		BHLHE40	0.754491	6.55365	0.00320412	0.0427837		RPL26	-0.766838	7.65062	0.000328654	0.0105008
COMMD6	-0.785712	3.89413	0.000915073	0.02013		LMCD1	0.612711	8.29209	0.000619813	0.0156619		USP32P1	-1.36054	3.06558	0.000245841	0.00926899
UGGT2	-0.965852	1.86284	0.000367259	0.0114118		SRGAP3	0.921466	2.36677	0.000710266	0.0169312		WSB1	-1.13559	5.93881	8.18931e-05	0.00452595
DOCK9	-1.01822	5.04001	0.000231905	0.00905816		CRTAP	0.482922	6.41115	0.00225848	0.0348952		RPL23A	-0.605456	6.83302	0.00111925	0.0228233
METTL21EP	-0.976799	3.92186	0.0028107	0.0397186		KLHL40	0.708245	7.9384	0.00101656	0.0211967		CPD	-0.562436	4.85993	0.000665254	0.016413
EFNB2	-0.751203	3.95278	1.24623e-05	0.00141066		PTPN23	0.557287	4.99034	0.00277521	0.0395192		SLFN11	-0.93708	3.33829	0.000697705	0.0168253
ARGLU1	-0.787137	6.29754	0.00059364	0.0152436		SCAP	0.499908	4.75167	0.000646196	0.0161084		MYO19	-0.763556	3.57829	0.000116998	0.00569643
ABHD13	-0.532342	3.71118	0.00345797	0.0446558		MAP4	0.937647	10.1418	0.000541462	0.0145083		RPL23	-0.648941	7.85022	0.00143377	0.0267307
IRS2	1.04755	4.97603	3.31509e-07	0.00011329		PFKFB4	0.798891	2.53492	0.000623851	0.0156925		CD300LG	-1.25795	4.04561	3.47861e-06	0.000567473
COL4A1	-0.910287	6.35734	0.000241671	0.00926899		CISH	1.20437	2.45473	0.000272523	0.00967909		GJC1	-1.18436	2.51578	1.90251e-06	0.000370256
ATP11A	0.583995	5.6334	0.000870954	0.0195182		SLMAP	0.478554	7.01463	0.0024522	0.0367103		ARHGAP27	-0.834031	2.50658	0.00161155	0.028627
MCF2L	-0.991081	4.445	0.000386395	0.0117755		KLF15	0.9325	6.03772	0.000173247	0.00741719		LUC7L3	-1.09119	6.31666	3.7335e-05	0.00296975
RASA3	0.43482	4.27007	0.0034916	0.0448291		PLXNA1	0.751952	5.41777	0.00041711	0.0124253		FLJ44342	-1.81698	3.0358	1.34724e-06	0.000304998
CCNB1IP1	-0.514165	4.89044	0.00188331	0.0314225		EPHB1	0.936622	2.89549	8.21264e-05	0.00452595		38231	-0.840364	2.43673	0.00305416	0.0417824
RNASE1	-0.688789	5.50584	0.00415158	0.0494136		MRAS	0.542036	5.44191	0.00114316	0.0230147		TUBD1	-0.647159	2.2253	0.00205324	0.0330098
NOP9	0.659818	5.48287	0.00307408	0.0417958		MCCC1	0.540393	4.54067	0.000782848	0.0178319		RNFT1	-0.857828	3.02601	1.5806e-05	0.00162349
ADCY4	-1.03794	3.61151	0.000284485	0.00989278		NAT8L	1.26417	3.48021	2.82368e-05	0.00250585		CA4	-1.21015	3.56534	4.51512e-07	0.000128426
STXBP6	-1.24939	2.68238	6.66399e-05	0.00398771		HTT	0.588728	5.64862	0.00179599	0.0305099		ACE	-0.645836	4.4794	0.00328673	0.0435665
G2E3	-0.839424	2.59873	0.000242533	0.00926899		ABLIM2	0.869609	7.11755	0.000165404	0.00725226		PECAM1	-0.877773	6.42706	0.000696753	0.0168253
CLEC14A	-0.706531	5.23162	0.000292228	0.0100178		SOD3	0.981895	3.24655	0.000700578	0.0168579		DDX5	-0.721491	7.52237	0.00073707	0.0171864
RPS29	-1.05566	5.88047	0.000338453	0.010727		LIMCH1	0.582534	8.71534	0.000298183	0.0101154		THOC1	-0.889692	3.02262	2.14519e-05	0.00199972
VCPKMT	-0.981316	2.34355	0.00115933	0.0232557		PARM1	0.620879	5.59459	9.88835e-05	0.00517412		COLEC12	-1.43467	3.36164	2.02735e-08	1.40559e-05
NID2	-0.907149	3.32361	0.000189029	0.00774352		SYNPO2	0.799134	10.9202	0.000561095	0.0147211		YES1	-0.638466	4.14765	0.00237874	0.0358037
LGALS3	-0.611591	5.24748	0.00388439	0.0473958		MYOZ2	0.892875	8.11158	0.00201821	0.0327421		APCDD1	-0.890417	3.86622	0.000547224	0.0145922
TMEM260	-0.80826	2.20645	0.00365905	0.0459161		ARHGAP10	0.451259	5.08422	0.0012739	0.0245762		TCF4	-0.973067	5.78582	0.000109141	0.00555367
FLJ31306	-0.736756	3.67178	0.00414757	0.0494136		TENM3	1.13917	3.26598	1.32097e-05	0.00146535		TNFAIP8L1	-0.86653	2.77175	0.00098362	0.0209516
TIMM9	-0.564299	3.78244	0.00389042	0.0473958		GDNF	1.71552	2.97996	3.00622e-07	0.000107574		PET100	-0.690398	2.69195	0.0018405	0.0310284
JKAMP	-0.60735	3.98561	0.00116818	0.0233363		LOC100506548	0.632614	4.64982	0.000436006	0.0128292		KANK3	-0.643299	3.97936	0.000188092	0.00774352
PRKCH	-0.858285	4.21291	2.22572e-07	8.81782e-05		OXCT1	1.2085	4.85006	3.09145e-05	0.0026584		COL5A3	-1.24173	4.68473	7.008e-07	0.000185095
RHOJ	-1.20407	3.5103	4.06205e-07	0.000118853		HCN1	1.82031	3.41485	5.94481e-08	3.29729e-05		DOCK6	-0.764606	4.33996	0.00306293	0.0417922
HSPA2	1.22239	7.43058	0.000157134	0.0069939		THBS4	1.42666	6.70571	0.00120901	0.0236535		ZNF441	-1.22602	2.95638	0.000247706	0.00928311
PLEKHG3	-0.885541	2.83292	0.00144585	0.0268208		MEF2C	0.508759	9.4994	0.00199516	0.0326435		ZNF440	-0.764317	2.09964	0.00096184	0.0206777
RAB15	1.1217	2.65764	0.00173068	0.0298113		PRR16	1.15138	4.13764	0.000256504	0.00951639		IER2	-0.641843	3.20702	0.00275266	0.0393496
SRSF5	-1.05074	6.45885	7.78494e-05	0.00442863		FAM50B	0.540869	4.39925	0.00348168	0.0447742		USHBP1	-1.21715	2.63947	1.80208e-06	0.000370256
SMOC1	0.854543	4.16168	0.00226658	0.0349696		KDM1B	0.596652	4.08604	0.00040947	0.0123096		BST2	-0.972401	4.39077	7.27949e-06	0.000961326
ALDH6A1	0.667663	5.46611	0.00149706	0.027314		ABCF1	0.482722	6.30761	0.00404335	0.0486439		ZNF493	-1.62864	2.83162	1.90604e-12	1.05719e-08
PGF	-0.765512	2.43207	0.00257648	0.0377056		DDR1	0.694027	5.12438	0.000491971	0.0138513		ZNF43	-0.778374	2.11828	0.00200768	0.0327421
LOC101928377	0.710953	1.66562	0.0031972	0.0427824		VARS	0.608298	5.37857	0.00371998	0.0463139		ZNF254	-1.05772	2.47948	3.18334e-05	0.00271636
SPTLC2	-0.644207	3.79359	0.00160676	0.0286096		HSPA1A	0.603973	7.35699	0.00202104	0.0327421		ZNF302	-0.472492	5.38843	0.000631868	0.0158224
SLIRP	-0.769382	5.27886	0.000308816	0.0101567		HSPA1B	0.586276	7.21448	0.00329803	0.0435665		ZNF181	-0.531519	4.60476	0.000155257	0.00697273
ADCK1	-0.743166	2.81807	0.00280607	0.0397072		UHRF1BP1	0.546428	5.51916	0.00234773	0.035627		POLR2I	-0.493236	5.22389	0.00282042	0.0398052
PTPN21	0.524701	4.60943	0.00377854	0.0466764		PPARD	0.52126	4.92498	0.000545474	0.0145806		COX7A1	-0.958781	8.93241	0.000114669	0.00569643
NDUFB1	-0.813421	5.69325	8.19733e-05	0.00452595		FANCE	0.875274	3.52534	9.16433e-05	0.00491111		ZNF780B	-0.882261	3.7771	0.000120407	0.00579737
ITPK1	0.516032	4.92247	0.00124777	0.0241563		CDKN1A	2.28289	3.43834	1.85295e-09	1.86862e-06		ZNF780A	-0.756481	2.42345	0.000724111	0.0169822
IFI27	-0.942707	4.62383	0.000173603	0.00741719		PRPH2	0.992273	4.22208	1.9315e-05	0.00186314		PVR	-0.66182	4.60406	0.00305258	0.0417824
CLMN	-1.09019	3.75645	0.000452328	0.0132044		PEX6	1.34283	4.88133	1.45408e-07	6.20389e-05		CEACAM19	-1.50835	3.16681	6.46923e-05	0.00394965
WARS	-0.564306	6.41093	0.00121947	0.0237742		CUL7	0.648765	4.94638	0.000720568	0.0169822		HIF3A	-1.04658	3.49328	9.62257e-05	0.00505892
DYNC1H1	0.613098	7.94085	0.00254615	0.0376091		RAB23	0.662281	3.83268	0.00028712	0.00993388		PRKD2	-0.749325	2.76676	0.00370171	0.0462088
C14orf2	-0.55639	6.53038	0.00212652	0.0336513		KCNQ5	0.963948	5.86427	9.79759e-06	0.00119434		LOC100506114	-1.11953	5.96279	0.000215482	0.0086294
KIF26A	-0.685344	3.1739	0.00380626	0.0468682		SIM1	0.618935	4.45857	0.0013426	0.0255024		ZNF480	-0.63968	3.51849	0.000688904	0.0167221
C14orf180	1.51758	2.74835	2.74999e-08	1.75674e-05		FOXO3	0.835287	6.6068	1.20537e-06	0.000289198		ZNF528	-0.789736	2.16722	0.00166556	0.029142
ZBTB42	0.804398	2.59089	0.00319274	0.0427742		VGLL2	0.743684	6.49879	0.00256938	0.037673		ZNF320	-0.753552	2.75233	0.00148808	0.0273131
HERC2P2	-0.631244	5.2057	0.00112378	0.0228374		HIVEP2	0.553225	6.38865	0.00351046	0.0449293		ZNF160	-0.711617	3.44187	0.00315186	0.0424727
TJP1	-0.906224	5.52487	2.81465e-06	0.000511852		STXBP5	0.532231	4.79329	0.000474714	0.0135601		ZNF415	-1.80884	2.15061	5.0747e-10	8.75669e-07
KLF13	0.718726	6.66702	0.000893729	0.0197897		IGF2R	0.679002	7.4712	0.000433529	0.0127902		ZNF304	-0.576399	3.29626	0.000817773	0.0185512
GOLGA8O	-0.957407	1.95809	0.0012777	0.0245814		DKFZp451B082	1.55978	2.37147	0.000214166	0.0086294		ZNF154	-1.26655	2.28839	7.21337e-05	0.00423375
ACTC1	2.57693	5.78379	1.22623e-09	1.36026e-06		ZNF853	0.645904	5.6581	0.00348207	0.0447742		ZNF587	-0.631935	3.40167	0.00363348	0.0458547
DLL4	-1.34869	2.98902	1.23212e-07	5.69498e-05		SKAP2	0.887556	3.63708	0.000171516	0.00740322		SH3YL1	-0.732747	3.29759	0.00154138	0.0278931
PLA2G4F	0.798735	3.43674	0.0017865	0.0303952		MTURN	0.706008	6.39597	0.000278464	0.00977531		TPO	-1.04219	2.50154	0.0026105	0.0379532
ZNF106	0.652496	10.9344	0.00174539	0.0299715		AUTS2	0.960321	3.85373	0.000161254	0.00709837		PXDN	-0.745711	4.0671	0.00396973	0.048022
STARD9	-1.51041	4.13055	4.8079e-05	0.00335998		GTF2IRD1	0.515658	5.07653	0.00362085	0.0458076		RPS7	-0.542547	6.31395	0.00352278	0.0449747
MAP1A	1.74073	3.72	0.000150621	0.00681958		HSPB1	0.785689	9.24994	0.000295114	0.0100729		TRIB2	-0.817242	4.10036	4.64723e-05	0.00334324
TMOD3	-1.03665	3.62258	0.000157359	0.0069939		LRCH4	0.458377	4.37492	0.00420847	0.0497897		GEN1	-0.773517	2.29067	0.00298123	0.0411328
UNC13C	2.22393	3.65444	4.10591e-06	0.000650669		CUX1	0.525867	6.25343	0.00409995	0.0490623		OST4	-0.651644	5.48833	0.000893221	0.0197897
ALDH1A2	-0.72798	3.96391	0.00268308	0.0388207		SND1	0.455609	5.21293	0.00202225	0.0327421		SLC5A6	-0.636005	3.29693	0.00343955	0.0445995
TLN2	0.549056	6.17008	0.00201116	0.0327421		STRIP2	0.507976	5.60565	0.000302844	0.0101212		IFT172	-0.781753	3.50769	0.000494194	0.0138787
RAB8B	-0.786921	2.92015	0.00365648	0.0459161		TMEM178B	1.05449	3.71207	0.000392731	0.0119358		EIF2AK2	-0.761097	2.90003	0.000300628	0.0101212
FAM96A	-0.604891	4.9958	0.000215232	0.0086294		ZYX	0.456246	5.389	0.0037032	0.0462088		SRSF7	-0.483753	5.05467	0.00273018	0.0391796
PTPLAD1	-0.65949	3.13767	0.00419381	0.0497029		DNAJB6	0.55522	7.92287	0.00306266	0.0417922		EML4	-0.779437	2.72977	0.00378699	0.0467287
MAP2K1	0.477843	5.62181	0.000989554	0.0209516		MYOM2	1.2639	9.789	9.34707e-08	4.50813e-05		EPAS1	-0.683198	7.40824	0.00228157	0.0350547
SMAD3	0.733414	6.62113	1.20393e-06	0.000289198		CTSB	0.560564	7.36065	0.000403625	0.0122		CALM2	-0.690707	6.45942	0.00145485	0.0268977
CLN6	0.552175	3.8335	0.00421011	0.0497897		PCM1	0.521148	7.86067	0.00155229	0.0280449		STON1	-1.11325	2.10305	0.000571737	0.0148531
THSD4	0.838103	2.98366	0.000281552	0.00982155		RHOBTB2	0.560513	4.77667	0.000313444	0.0101945		CCDC85A	-1.02942	3.05661	0.00015866	0.00701203
NEO1	0.986714	5.90964	6.33926e-08	3.34864e-05		PTK2B	0.651659	2.72468	0.00214651	0.0339192		AHSA2	-1.21565	4.35476	0.00010336	0.00533291
C15orf59	1.02167	1.86831	0.00156593	0.0280627		JPH1	0.526733	8.72664	0.00189018	0.031436		TIA1	-0.584556	5.19534	0.00254006	0.0375692
CSPG4	0.930533	4.27583	5.09479e-05	0.00340813		CA3	0.702472	12.1771	0.000518793	0.0143158		SFXN5	-0.610712	3.71681	0.0011817	0.0234922
GOLGA6L9	-0.848049	2.25434	0.00218309	0.0341484		DERL1	0.433089	5.64291	0.00296957	0.0410729		TPRKB	-0.584705	4.18466	0.00119797	0.0235593
RPS17	-0.631008	7.29724	0.00236488	0.0357892		FAM49B	0.477343	5.13529	0.00385921	0.0472519		STAMBP	-0.537023	5.06404	0.000115607	0.00569643
PDE8A	-0.847194	3.33178	0.000722739	0.0169822		KHDRBS3	0.605842	4.33986	0.00227325	0.0350116		BOLA3	-0.636777	4.41154	0.0012786	0.0245814
POLG	0.550766	5.47623	0.00355611	0.0452384		MAFA	0.813061	4.96567	0.000669343	0.016427		MAT2A	-0.574581	6.73543	0.00208025	0.0332929
PLIN1	1.93217	3.3627	0.00178281	0.030379		ZC3H3	0.741133	4.22188	0.00195109	0.0321597		SEMA4C	-0.89425	3.49381	3.25871e-05	0.00275658
SNRPA1	-0.828576	1.898	0.0038966	0.0473958		PARP10	0.989319	4.36231	5.52572e-10	8.75669e-07		COX5B	-0.607052	8.20765	0.00330294	0.0435665
DECR2	0.530159	4.80252	0.000560615	0.0147211		GRINA	0.542285	5.84853	0.000273383	0.00967909		RPL31	-0.778062	7.03734	0.00151776	0.0275106
RAB11FIP3	0.708445	5.90183	3.69685e-05	0.00296975		SCXB	1.01015	2.55538	0.000125264	0.00591298		NPHP1	-1.0729	5.04896	1.08424e-05	0.00129528
PKD1	0.560487	7.52243	0.00366668	0.0459599		CDKN2B	0.96316	2.69338	0.00100397	0.0210133		LINC00116	-0.890879	6.31889	0.000243512	0.00926899
ABCA3	0.578665	3.78545	0.00149209	0.0273131		UBAP2	0.634704	5.65167	0.000575571	0.0149178		TMEM87B	-0.716758	2.48014	0.000981363	0.0209516
TBC1D24	0.578715	3.49034	0.00362283	0.0458076		LINC00950	0.698516	1.75956	0.00211804	0.0336128		CCNT2	-0.939298	4.68809	0.000170781	0.00740028
TRAP1	0.553633	7.17386	0.000778674	0.01781		PRUNE2	1.53299	2.63473	0.00203436	0.0328012		MMADHC	-0.53222	6.64734	0.000978122	0.0209465
RBFOX1	0.440201	6.80975	0.00332676	0.043742		TLE1	0.979913	6.09987	4.07141e-07	0.000118853		LOC101929336	-1.82082	2.70999	4.59818e-06	0.000675091
CARHSP1	-0.671217	3.07242	0.00392648	0.0476027		HABP4	0.683352	3.33395	0.000785624	0.0178584		TANC1	-0.806896	3.21223	0.0028619	0.0400847
MKL2	-0.554824	5.44994	0.00119232	0.0235593		MVB12B	0.787734	5.57266	0.000368855	0.0114294		SCN7A	-1.06808	4.62322	6.47375e-05	0.00394965
RPS15A	-0.765485	7.98791	0.000522899	0.0143223		LINC00963	0.961574	1.90604	0.000530492	0.0144588		NOSTRIN	-1.32648	2.31753	0.000117563	0.00569643
ARL6IP1	-0.758203	4.4894	0.00101209	0.0211434		RAPGEF1	0.564341	7.77644	0.00332231	0.043742		ITGA6	-1.14421	5.74971	1.54284e-06	0.000335584
NPIPB5	-0.71892	4.49598	0.00135002	0.0255996		BRD3	0.522628	4.6171	0.00372442	0.0463172		CIR1	-0.573017	4.03107	0.000749707	0.0173622
GTF3C1	0.592928	6.10587	0.00426707	0.0498748		CAMSAP1	0.580069	6.27542	0.00211631	0.0336128		SSFA2	-0.642961	6.3265	0.000401715	0.0121755
BOLA2B	-0.793931	2.04828	0.00119326	0.0235593		NELFB	0.472695	5.45831	0.00411991	0.049195		CALCRL	-0.801389	3.95878	0.00236904	0.0357892
TBC1D10B	0.597665	5.03887	0.000428941	0.0127226		TSPAN7	0.456863	7.46118	0.00256108	0.0376292		ORMDL1	-0.740752	3.9598	0.00120555	0.0236274
CTF1	0.883625	3.46692	8.98674e-05	0.00483932		USP11	0.667808	4.74308	6.0164e-05	0.00379204		MSTN	-1.17151	4.28031	0.0016129	0.028627
ARMC5	0.569935	3.59301	0.00312036	0.0423156		PPP1R3F	0.632352	4.84719	0.00151772	0.0275106		MFSD6	-0.681003	3.32387	0.00350279	0.0449208
ZNF423	0.628702	5.14472	0.000292595	0.0100178		MAGED1	0.575761	5.51005	0.00267636	0.038809		NAB1	-0.984678	3.40756	0.000265297	0.00960907
NDRG4	-1.06452	3.61464	1.62273e-05	0.00164339		MAGED2	0.586183	6.0774	6.1932e-05	0.00385962		MYO1B	-1.14199	4.03026	3.8019e-05	0.0029911
CDH5	-0.884117	5.90921	0.000223925	0.00890323		MUM1L1	0.778687	4.25403	5.10006e-05	0.00340813		SDPR	-1.27463	5.49688	1.5146e-06	0.000335584
TPPP3	1.05415	4.41584	8.68199e-06	0.00109442		CXorf57	1.0147	1.69291	0.00015762	0.0069939		SLC39A10	-1.05679	2.04841	5.18416e-05	0.00342794
NFAT5	-0.66678	4.81691	0.00238699	0.0358369		ATP1B4	0.464855	6.38097	0.00149052	0.0273131		HECW2	-1.041	2.42539	0.000756197	0.017476
AARS	0.650147	5.92929	0.000236026	0.00918679		APLN	0.869309	1.90712	0.00164955	0.0289992		HSPE1	-1.00517	2.74256	1.36859e-05	0.00148841
ST3GAL2	0.773498	5.65022	4.70158e-05	0.00334324		HTATSF1	0.574279	7.2529	0.00161862	0.0286827		CLK1	-0.968851	6.50346	0.000268231	0.00960907
IST1	-0.40161	5.6448	0.00390126	0.0474005		BGN	0.907309	3.57369	0.0011808	0.0234922		ORC2	-0.574595	3.58539	0.000920252	0.0201746
GLG1	0.504611	6.45064	0.00185381	0.0310713		SRPK3	0.591409	7.17795	0.000830024	0.0187525		NDUFB3	-0.677337	6.15468	0.00181838	0.0307489
FBXO31	0.577946	6.43578	0.0016442	0.0289509		PLXNA3	0.954301	2.76004	0.00426723	0.0498748		CASP10	-1.07319	2.72979	4.74818e-05	0.00335487
AC137932.6	-0.701451	2.17883	0.00297219	0.0410729								STRADB	-0.534334	6.02516	0.000242415	0.00926899
NXN	0.721355	6.67236	0.000274243	0.00967909								MYL1	-0.660582	12.8659	0.00168351	0.0293174
MIR22HG	-0.677816	5.6038	0.000343859	0.0108673								LOC101928568	-1.37678	3.27744	1.9185e-05	0.00186314
P2RX5	1.10886	1.77556	0.000100086	0.00521248								COL4A4	-0.855	4.53812	0.00145358	0.0268977
MYBBP1A	0.796656	5.26514	0.000955387	0.0206189								COL4A3	-1.34062	5.59617	0.000183076	0.00757784
PELP1	0.67268	5.55956	0.0038933	0.0473958								USP40	-0.613491	4.62344	0.00188621	0.0314225
PLD2	-0.750422	2.47741	0.00237132	0.0357892								TCF15	-1.01884	3.11155	2.69782e-05	0.00245092
USP6	-1.07594	5.34512	0.000692967	0.016784								HSPA12B	-0.723691	3.84553	0.00122871	0.0238978
NLRP1	-0.99975	3.42694	0.000622191	0.0156863								GPCPD1	-0.989063	4.78744	1.64115e-06	0.000350102
WSCD1	0.761387	4.81116	0.00205623	0.0330098								CD93	-0.944202	6.19223	0.000218292	0.00871049
XAF1	-1.48129	3.77423	8.62206e-06	0.00109442								ID1	-0.641359	4.70917	0.000539651	0.0145083
BCL6B	-1.25503	3.55375	1.87786e-06	0.000370256								CCM2L	-0.985867	2.04604	0.000771366	0.0176793
FXR2	0.580096	6.90086	0.00365588	0.0459161								PPP1R16B	-1.40664	3.50943	2.96253e-07	0.000107574
ATP1B2	-0.897903	1.99789	0.000305653	0.0101212								ADA	-1.19757	2.43149	3.52673e-05	0.00287662
TMEM88	-0.902352	3.35251	5.079e-05	0.00340813								FAM65C	-1.17445	3.38697	1.2406e-05	0.00141066
ARHGEF15	-0.831759	3.88431	0.000253331	0.0094302								ATP5E	-0.858694	5.30463	0.000662008	0.0164111
RPL26	-0.766838	7.65062	0.000328654	0.0105008								RPS21	-0.726789	6.53049	0.0014047	0.0263216
MYH8	0.695295	8.21847	0.0038575	0.0472519								HELZ2	-0.775106	2.8079	0.00315492	0.0424727
USP32P1	-1.36054	3.06558	0.000245841	0.00926899								JAM2	-0.99816	3.95878	0.000178107	0.00748388
FOXO3B	0.733221	5.14358	2.41594e-05	0.00223333								CYYR1	-0.909872	4.24208	0.000111889	0.00564177
KCNJ12	0.638903	7.16183	0.00116965	0.0233363								ERG	-1.15111	3.60494	5.01139e-05	0.00340813
WSB1	-1.13559	5.93881	8.18931e-05	0.00452595								MX1	-1.11899	3.17116	0.000309592	0.0101567
RPL23A	-0.605456	6.83302	0.00111925	0.0228233								CLDN5	-1.02693	4.64994	1.11471e-06	0.000281034
SSH2	0.567049	6.83287	0.00284439	0.0399372								TUG1	-0.68182	5.90492	0.000380655	0.011697
CPD	-0.562436	4.85993	0.000665254	0.016413								APOL3	-0.972015	4.12162	7.59185e-05	0.00436354
SLFN11	-0.93708	3.33829	0.000697705	0.0168253								CARD10	-0.695917	3.539	0.00181239	0.0306945
MYO19	-0.763556	3.57829	0.000116998	0.00569643								DDX17	-0.896294	7.94627	0.000103359	0.00533291
RPL23	-0.648941	7.85022	0.00143377	0.0267307								PDGFB	-0.574354	4.37283	0.00314237	0.0424584
CACNB1	0.544218	7.99735	0.0009164	0.02013								MGAT3	-0.818417	1.84791	0.00176872	0.0302445
ERBB2	1.03213	5.1956	2.81335e-10	6.2417e-07								NDUFA6	-0.488952	6.98094	0.00426805	0.0498748
STAT3	0.629371	6.95401	0.000490274	0.0138445								FAM118A	-0.692569	4.11195	0.00339441	0.0442663
CD300LG	-1.25795	4.04561	3.47861e-06	0.000567473								SHANK3	-1.12308	5.18338	6.5157e-05	0.00394965
GJC1	-1.18436	2.51578	1.90251e-06	0.000370256								THUMPD3-AS1	-0.757106	2.53608	0.00151262	0.0275074
PLCD3	0.843419	7.56785	0.000246471	0.00926899								SLC6A1	-1.19686	2.80255	9.25626e-05	0.00493652
ARHGAP27	-0.834031	2.50658	0.00161155	0.028627								MRPS25	-0.541637	5.92707	0.000131359	0.00614837
KAT7	0.459966	5.20807	0.00280002	0.0397072								SH3BP5-AS1	-1.17911	3.04905	0.00215598	0.0339888
CHAD	1.36928	2.74347	3.59682e-05	0.00291237								NKTR	-1.06897	5.90609	0.000261417	0.00960168
LUC7L3	-1.09119	6.31666	3.7335e-05	0.00296975								ALS2CL	-0.860207	4.46454	0.000876357	0.0195602
FLJ44342	-1.81698	3.0358	1.34724e-06	0.000304998								AMT	-0.790645	3.12288	0.00227561	0.0350116
38231	-0.840364	2.43673	0.00305416	0.0417824								RBM5-AS1	-1.35709	2.49734	0.000133785	0.00618367
TUBD1	-0.647159	2.2253	0.00205324	0.0330098								SEMA3G	-0.755001	4.32719	0.000715234	0.0169532
RNFT1	-0.857828	3.02601	1.5806e-05	0.00162349								CCDC66	-0.712576	2.74939	0.00121218	0.0236737
CA4	-1.21015	3.56534	4.51512e-07	0.000128426								KCTD6	-0.711799	2.48508	0.00102102	0.02125
ACE	-0.645836	4.4794	0.00328673	0.0435665								SENP7	-0.71756	4.01411	0.000473949	0.0135601
PECAM1	-0.877773	6.42706	0.000696753	0.0168253								TRMT10C	-0.481353	4.50584	0.00176947	0.0302445
DDX5	-0.721491	7.52237	0.00073707	0.0171864								NFKBIZ	-0.908621	2.05532	0.000762573	0.0175867
AXIN2	0.625629	3.74989	0.00106632	0.0220273								PHLDB2	-0.910846	3.17582	0.00157794	0.0281869
SOX9	1.21983	2.30928	7.93707e-05	0.00446933								ARHGAP31	-1.08429	3.78883	0.000116179	0.00569643
HN1	0.571022	5.26719	0.000350278	0.0110074								COX17	-0.688454	4.77885	0.000945242	0.0205197
40057	0.613388	6.30178	0.00022853	0.00902164								PARP15	-1.36575	2.29507	0.00093696	0.0203798
NPLOC4	0.609331	7.39357	0.00329959	0.0435665								HSPBAP1	-0.761022	3.4186	0.000205536	0.00838239
FASN	1.11691	3.8588	5.33747e-05	0.00346249								LOC100129550	-0.762652	4.89109	0.00043326	0.0127902
THOC1	-0.889692	3.02262	2.14519e-05	0.00199972								CCDC14	-0.801711	3.16733	0.00330152	0.0435665
COLEC12	-1.43467	3.36164	2.02735e-08	1.40559e-05								GATA2	-1.06885	2.9559	1.30737e-05	0.00146491
YES1	-0.638466	4.14765	0.00237874	0.0358037								ATP2C1	-0.564005	5.28852	0.00304329	0.0417824
MYOM1	0.793127	10.2743	0.00339589	0.0442663								SLC25A36	-0.641041	5.85801	0.000949194	0.0205653
EPB41L3	1.34737	3.16011	5.81645e-07	0.00015737								RASA2	-0.968654	2.64952	0.00202969	0.0327734
APCDD1	-0.890417	3.86622	0.000547224	0.0145922								PLOD2	-0.845573	2.08388	0.00116644	0.0233363
FHOD3	1.03587	6.27246	4.43551e-06	0.000675091								TM4SF1	-0.834146	5.46777	0.00111355	0.0227908
TCF4	-0.973067	5.78582	0.000109141	0.00555367								MME	-0.667867	5.99382	0.00177999	0.0303777
NFATC1	0.66439	5.58539	0.00402528	0.0485353								TIPARP	-0.680257	3.48017	0.00388955	0.0473958
STK11	0.614021	6.71575	0.00373025	0.0463325								CCNL1	-0.84127	4.64039	0.0011396	0.0230044
NFIC	0.717464	8.24036	0.00414782	0.0494136								MLF1	-0.936168	6.60595	0.0016869	0.029322
FZR1	0.593593	4.52538	0.00110729	0.0227046								RP11-3P17.4	-0.739823	5.91465	0.0003143	0.0101945
NMRK2	0.741915	7.05991	0.00220948	0.0343755								MECOM	-1.39773	2.99056	9.03313e-06	0.00112589
HDGFRP2	0.521735	5.74513	0.00335823	0.0439821								PLD1	-0.978928	2.06725	0.000378066	0.0116497
TNFAIP8L1	-0.86653	2.77175	0.00098362	0.0209516								TNFSF10	-0.932639	4.34739	0.000313707	0.0101945
TICAM1	0.696375	3.31957	0.0007648	0.0176015								TTC14	-0.969068	3.84187	0.00130253	0.0248691
PLIN3	0.726157	6.10191	5.3131e-05	0.00346249								ABCC5	-1.01581	6.01486	3.3702e-07	0.00011329
PET100	-0.690398	2.69195	0.0018405	0.0310284								CCDC50	-0.488913	5.46195	0.00253577	0.0375692
KANK3	-0.643299	3.97936	0.000188092	0.00774352								ATP5I	-0.569176	6.60428	0.00180304	0.0305828
COL5A3	-1.24173	4.68473	7.008e-07	0.000185095								PCGF3	-0.452089	4.76133	0.00337851	0.0441435
SLC44A2	0.645123	7.09343	0.000117595	0.00569643								HTRA3	-0.625578	5.66324	0.000510592	0.01416
SMARCA4	0.529774	4.96068	0.00424034	0.0498748								TAPT1-AS1	-0.636941	5.81489	0.000500976	0.0139631
DOCK6	-0.764606	4.33996	0.00306293	0.0417922								LDB2	-1.01114	3.85963	0.000377972	0.0116497
LPPR2	0.812258	4.87498	8.16501e-05	0.00452595								SEPSECS	-0.677633	3.20467	0.00317278	0.0425696
ZNF441	-1.22602	2.95638	0.000247706	0.00928311								ZCCHC4	-0.619993	2.92251	0.000681393	0.0165761
ZNF440	-0.764317	2.09964	0.00096184	0.0206777								KLHL5	-0.820416	3.85139	0.000267362	0.00960907
NACC1	0.670269	4.70728	0.000952939	0.0206061								RPL9	-0.692707	6.7545	0.00194627	0.0321279
IER2	-0.641843	3.20702	0.00275266	0.0393496								DCUN1D4	-0.906967	4.38251	1.08592e-05	0.00129528
SAMD1	0.841911	3.50101	4.45103e-05	0.00330048								LNX1	-0.905298	2.47007	0.00201675	0.0327421
CD97	0.507149	4.65066	0.00288057	0.0401939								NUP54	-0.51616	4.07865	0.00155734	0.0280627
GIPC1	0.588234	5.39903	0.000259962	0.00960168								CNOT6L	-0.593151	4.17022	0.00252463	0.037491
CHERP	0.644404	4.6168	0.00428251	0.0499011								SPARCL1	-0.813931	8.03122	0.00139518	0.0262317
USHBP1	-1.21715	2.63947	1.80208e-06	0.000370256								GPRIN3	-1.18426	2.30623	4.37271e-05	0.00329976
BST2	-0.972401	4.39077	7.27949e-06	0.000961326								DNAJB14	-0.789217	3.4748	0.00157247	0.0281346
MAST3	1.25625	2.42726	3.93111e-07	0.000118853								EMCN	-1.43754	4.90128	5.75403e-08	3.29729e-05
PIK3R2	0.874343	4.55452	9.37421e-06	0.00115542								RPL34	-0.753463	6.62388	0.000476737	0.0135601
PGPEP1	0.711489	5.64041	6.69003e-05	0.00398771								NDNF	-1.61234	2.74538	6.72227e-05	0.00398771
ELL	0.577823	4.54216	0.0023874	0.0358369								ANKRD50	-0.841646	2.71944	9.46843e-05	0.00500159
ZNF493	-1.62864	2.83162	1.90604e-12	1.05719e-08								MFSD8	-0.826942	3.09631	0.000117084	0.00569643
ZNF43	-0.778374	2.11828	0.00200768	0.0327421								TBC1D9	-0.923982	2.59347	0.00247942	0.0370347
ZNF254	-1.05772	2.47948	3.18334e-05	0.00271636								EDNRA	-0.785237	2.66062	0.00320502	0.0427837
PLEKHF1	0.73804	5.60647	0.0024935	0.0371779								RPS3A	-0.590903	7.14295	0.00231218	0.0353292
NUDT19	0.600879	5.12353	0.00258703	0.0378101								GUCY1A3	-1.13888	4.55535	4.06399e-05	0.00310909
RGS9BP	0.954777	3.54563	0.000288354	0.00993388								GUCY1B3	-1.43123	3.04969	2.15644e-06	0.000405448
CEBPA	0.825612	3.01629	0.000120724	0.00579737								DDX60L	-0.93399	2.39345	0.00147554	0.0271896
CEBPA-AS1	0.811758	2.39316	0.00290085	0.0403753								CDKN2AIP	-0.574511	3.4523	0.00106901	0.0220418
ZNF302	-0.472492	5.38843	0.000631868	0.0158224								MYO10	-0.706586	4.08251	0.00199473	0.0326435
ZNF181	-0.531519	4.60476	0.000155257	0.00697273								GUSBP1	-0.888045	2.47595	0.00192263	0.03188
RBM42	0.461669	5.19496	0.00425465	0.0498748								PRKAA1	-0.637863	4.96387	0.000989729	0.0209516
HSPB6	1.03249	10.1727	0.000613468	0.0156619								RPL37	-0.690096	7.93926	0.000522759	0.0143223
POLR2I	-0.493236	5.22389	0.00282042	0.0398052								ITGA1	-1.45548	4.49204	1.80889e-06	0.000370256
COX7A1	-0.958781	8.93241	0.000114669	0.00569643								ARL15	-0.941488	2.41526	0.00344156	0.0445995
ZNF780B	-0.882261	3.7771	0.000120407	0.00579737								PLK2	-1.0027	3.14802	0.00423462	0.0498748
ZNF780A	-0.756481	2.42345	0.000724111	0.0169822								PPWD1	-0.679773	3.64828	0.00234025	0.035611
PRX	1.05921	3.30363	4.992e-05	0.00340813								SREK1	-0.857264	5.07262	2.01245e-06	0.000384898
BCKDHA	0.631347	6.33594	0.000566987	0.014799								MRPS36	-0.56953	4.40424	0.00156087	0.0280627
PVR	-0.66182	4.60406	0.00305258	0.0417824								NSA2	-0.505423	5.27678	0.00393167	0.0476135
CEACAM19	-1.50835	3.16681	6.46923e-05	0.00394965								HMGCR	-0.699714	3.07823	0.000251621	0.00939808
DMPK	0.963646	7.53574	1.14346e-05	0.0013213								PAPD4	-0.492213	4.27659	0.00374211	0.046378
HIF3A	-1.04658	3.49328	9.62257e-05	0.00505892								MTX3	-0.693515	3.97745	0.000412226	0.012358
PRKD2	-0.749325	2.76676	0.00370171	0.0462088								ZFYVE16	-0.507719	4.78726	0.0031397	0.0424584
LIG1	0.629018	2.32284	0.00223482	0.0346241								RASGRF2	-1.45709	3.24102	5.50305e-06	0.000772726
PLEKHA4	1.20094	3.86647	6.4121e-10	8.89118e-07								RPS23	-0.676561	8.35053	0.00119995	0.0235593
PPP1R15A	0.582734	5.49203	0.000310386	0.0101567								COX7C	-0.848146	8.14789	7.32116e-05	0.00425202
LOC100506114	-1.11953	5.96279	0.000215482	0.0086294								CCNH	-0.553413	3.55764	0.00216334	0.0340397
ZNF480	-0.63968	3.51849	0.000688904	0.0167221								TMEM161B-AS1	-0.720309	3.01782	0.00049712	0.0138906
ZNF528	-0.789736	2.16722	0.00166556	0.029142								STARD4-AS1	-1.2897	3.47812	6.36602e-05	0.00394515
ZNF320	-0.753552	2.75233	0.00148808	0.0273131								EPB41L4A	-0.905527	2.80497	0.00423887	0.0498748
ZNF160	-0.711617	3.44187	0.00315186	0.0424727								YTHDC2	-0.420643	4.78508	0.0034479	0.0446296
ZNF415	-1.80884	2.15061	5.0747e-10	8.75669e-07								SEMA6A	-1.33972	3.20088	1.08892e-06	0.000280915
CACNG6	0.718809	6.69723	0.000115461	0.00569643								PPIC	-0.625526	4.5468	2.59624e-05	0.00238017
ZNF304	-0.576399	3.29626	0.000817773	0.0185512								UQCRQ	-0.543663	7.90799	0.000467517	0.0135056
ZNF154	-1.26655	2.28839	7.21337e-05	0.00423375								REEP2	-0.754297	4.10708	0.00126418	0.0244312
ZNF587	-0.631935	3.40167	0.00363348	0.0458547								SPATA24	-0.717481	2.20241	0.000829441	0.0187525
TRIM28	0.515833	6.5752	0.00237764	0.0358037								ARAP3	-0.917179	3.63855	0.000515202	0.0142522
SH3YL1	-0.732747	3.29759	0.00154138	0.0278931								PCDH1	-0.870605	3.61872	3.51181e-05	0.00287662
TPO	-1.04219	2.50154	0.0026105	0.0379532								PCDH12	-1.14969	3.28435	2.39345e-06	0.000442509
PXDN	-0.745711	4.0671	0.00396973	0.048022								ABLIM3	-0.911448	5.78485	1.45417e-05	0.00152615
RPS7	-0.542547	6.31395	0.00352278	0.0449747								GRPEL2	-0.552065	3.48325	0.00398015	0.0480957
ROCK2	0.46186	6.96008	0.00268417	0.0388207								SLC36A2	-0.611283	6.09746	0.000993469	0.0209516
TRIB2	-0.817242	4.10036	4.64723e-05	0.00334324								MFAP3	-0.482685	4.64585	0.002515	0.0374483
GEN1	-0.773517	2.29067	0.00298123	0.0411328								NEURL1B	-1.19398	5.09651	3.75054e-07	0.000118853
RAB10	0.501769	8.66652	0.00348329	0.0447742								FLT4	-1.08265	3.04584	0.000132857	0.00616646
OST4	-0.651644	5.48833	0.000893221	0.0197897								BTNL9	-1.2465	4.92711	5.44616e-07	0.000151036
SLC5A6	-0.636005	3.29693	0.00343955	0.0445995								TRIM52	-1.28265	2.13827	4.59673e-06	0.000675091
IFT172	-0.781753	3.50769	0.000494194	0.0138787								MYLK4	-1.60223	5.26504	1.39521e-05	0.00150263
CRIM1	0.513515	6.133	0.00382956	0.0470447								NRN1	-0.92734	3.87736	0.000359334	0.0111969
FEZ2	0.898349	6.91942	1.74234e-07	7.15845e-05								NEDD9	-1.15982	4.66762	4.93418e-05	0.00339968
EIF2AK2	-0.761097	2.90003	0.000300628	0.0101212								ZKSCAN8	-0.754842	4.53327	0.000992319	0.0209516
SRSF7	-0.483753	5.05467	0.00273018	0.0391796								ZSCAN26	-0.538719	3.44488	0.00403193	0.0485627
EML4	-0.779437	2.72977	0.00378699	0.0467287								GABBR1	-1.28479	2.91671	0.00426142	0.0498748
EPAS1	-0.683198	7.40824	0.00228157	0.0350547								HLA-E	-0.728643	7.90487	0.000930734	0.0203642
CALM2	-0.690707	6.45942	0.00145485	0.0268977								NOTCH4	-1.23488	4.65005	3.1186e-06	0.000556653
STON1	-1.11325	2.10305	0.000571737	0.0148531								HLA-DRB5	-0.867264	4.10275	0.00113295	0.022934
EFEMP1	0.912238	4.00289	0.00215705	0.0339888								HLA-DPA1	-0.976944	5.09164	0.00211235	0.0336128
CCDC85A	-1.02942	3.05661	0.00015866	0.00701203								RPS18	-0.561947	8.08393	0.00078148	0.0178319
AHSA2	-1.21565	4.35476	0.00010336	0.00533291								ANKS1A	-0.844996	5.11592	7.30548e-05	0.00425202
SLC1A4	1.02889	6.35137	0.00304522	0.0417824								DAAM2	-1.02945	5.78339	4.6702e-05	0.00334324
TIA1	-0.584556	5.19534	0.00254006	0.0375692								VEGFA	-0.52489	6.75411	0.00143815	0.0267675
SFXN5	-0.610712	3.71681	0.0011817	0.0234922								ENPP4	-0.741969	5.73198	2.92018e-05	0.00255067
TPRKB	-0.584705	4.18466	0.00119797	0.0235593								GPR116	-1.32298	6.00122	1.22531e-06	0.000289198
STAMBP	-0.537023	5.06404	0.000115607	0.00569643								CD109	-1.04192	2.74166	0.00208287	0.0332929
BOLA3	-0.636777	4.41154	0.0012786	0.0245814								MYO6	-0.974384	2.94778	0.00329772	0.0435665
MAT2A	-0.574581	6.73543	0.00208025	0.0332929								KIAA1009	-0.824387	1.67074	0.00374603	0.046378
ARID5A	0.624511	4.29791	0.000268404	0.00960907								PNISR	-1.01043	6.3168	3.92408e-05	0.00304404
SEMA4C	-0.89425	3.49381	3.25871e-05	0.00275658								TUBE1	-1.0226	2.64836	0.000525976	0.0143711
COX5B	-0.607052	8.20765	0.00330294	0.0435665								FAM229B	-0.748108	2.4985	0.00269801	0.0389194
LONRF2	0.742458	5.0282	0.00218872	0.0341484								LAMA4	-0.733609	4.70025	0.00291237	0.0404342
RPL31	-0.778062	7.03734	0.00151776	0.0275106								GJA1	-1.08097	3.59156	0.00165727	0.0290887
NPHP1	-1.0729	5.04896	1.08424e-05	0.00129528								SMPDL3A	-0.500706	4.54491	0.000910894	0.0201286
LINC00116	-0.890879	6.31889	0.000243512	0.00926899								EPB41L2	-0.974333	5.39584	0.00070487	0.0168996
TMEM87B	-0.716758	2.48014	0.000981363	0.0209516								MED23	-0.55139	3.93955	0.00184802	0.0310713
AC079586.1	1.27853	5.58938	0.000131936	0.00614945								SLC18B1	-0.979427	2.2798	0.000279506	0.00978095
ARHGEF4	0.675466	3.83599	0.000417797	0.0124253								AHI1	-0.649781	2.75506	0.00275713	0.0393627
CCNT2	-0.939298	4.68809	0.000170781	0.00740028								PDE7B	-0.717594	3.21571	0.000581629	0.0150047
R3HDM1	0.491522	5.20958	0.00326075	0.043439								PHACTR2	-1.10795	4.57589	7.47196e-06	0.000975135
LRP1B	1.30621	4.39115	0.00380822	0.0468682								PLAGL1	-1.21368	3.42756	0.000463486	0.013431
MMADHC	-0.53222	6.64734	0.000978122	0.0209465								SASH1	-0.900495	5.02311	0.000108337	0.00553817
LOC101929336	-1.82082	2.70999	4.59818e-06	0.000675091								RPS18P9	-0.544662	4.40015	0.00169221	0.0293308
TANC1	-0.806896	3.21223	0.0028619	0.0400847								MYCT1	-1.27174	3.89408	1.31911e-06	0.000304851
SCN7A	-1.06808	4.62322	6.47375e-05	0.00394965								MLLT4	-1.04735	5.34971	3.95608e-05	0.00304756
NOSTRIN	-1.32648	2.31753	0.000117563	0.00569643								NDUFA4	-0.686008	8.53019	0.000210292	0.00854494
ITGA6	-1.14421	5.74971	1.54284e-06	0.000335584								TSPAN13	-1.14308	2.9155	3.28016e-05	0.00275658
CIR1	-0.573017	4.03107	0.000749707	0.0173622								RPL23P8	-0.722297	5.29659	0.00244775	0.0366931
ZNF385B	1.2783	3.23515	0.000358771	0.0111969								RAPGEF5	-0.982036	3.1462	0.000305494	0.0101212
SSFA2	-0.642961	6.3265	0.000401715	0.0121755								TOMM7	-0.687727	7.26652	0.00271259	0.0390282
CALCRL	-0.801389	3.95878	0.00236904	0.0357892								FAM126A	-0.813694	5.73112	0.000561347	0.0147211
ORMDL1	-0.740752	3.9598	0.00120555	0.0236274								OSBPL3	-1.85283	2.9043	2.82688e-07	0.000107574
MSTN	-1.17151	4.28031	0.0016129	0.028627								CPVL	-0.695925	2.92736	0.00411977	0.049195
MFSD6	-0.681003	3.32387	0.00350279	0.0449208								INMT	-0.724633	3.71084	0.000631399	0.0158224
NAB1	-0.984678	3.40756	0.000265297	0.00960907								AQP1	-1.1453	8.03842	1.88794e-06	0.000370256
MYO1B	-1.14199	4.03026	3.8019e-05	0.0029911								PKD1L1	-1.13375	2.37842	0.000619569	0.0156619
SDPR	-1.27463	5.49688	1.5146e-06	0.000335584								SEC61G	-0.739923	3.70781	0.00166353	0.029142
SLC39A10	-1.05679	2.04841	5.18416e-05	0.00342794								ZNF273	-1.23168	2.73253	0.00341767	0.0444457
HECW2	-1.041	2.42539	0.000756197	0.017476								STAG3L3	-0.867665	2.95533	5.98254e-05	0.00379204
HSPE1	-1.00517	2.74256	1.36859e-05	0.00148841								STAG3L2	-0.783516	2.90796	0.00119535	0.0235593
CLK1	-0.968851	6.50346	0.000268231	0.00960907								STAG3L1	-0.777383	3.11098	0.000328904	0.0105008
ORC2	-0.574595	3.58539	0.000920252	0.0201746								FGL2	-1.01273	4.26237	0.000717966	0.0169817
NDUFB3	-0.677337	6.15468	0.00181838	0.0307489								GSAP	-1.06699	2.55332	0.000262265	0.00960168
CASP10	-1.07319	2.72979	4.74818e-05	0.00335487								GNAI1	-0.881388	3.37715	0.000128795	0.00605393
STRADB	-0.534334	6.02516	0.000242415	0.00926899								DMTF1	-0.900625	4.22454	0.000407186	0.0122742
MYL1	-0.660582	12.8659	0.00168351	0.0293174								TP53TG1	-0.676324	3.53962	8.51384e-05	0.00460702
IGFBP5	0.664395	9.81503	0.000934876	0.0203798								GATAD1	-1.14088	3.89837	1.96559e-05	0.00186361
LOC101928568	-1.37678	3.27744	1.9185e-05	0.00186314								CDK6	-1.03798	2.79537	0.0030745	0.0417958
OBSL1	0.606003	6.55789	0.000712782	0.0169312								GNG11	-0.926437	4.85413	0.000231348	0.00905816
COL4A4	-0.855	4.53812	0.00145358	0.0268977								SHFM1	-0.705342	4.44811	0.00423212	0.0498748
COL4A3	-1.34062	5.59617	0.000183076	0.00757784								ZNF655	-0.617867	4.7098	0.00018249	0.00757784
NCL	0.481691	7.64019	0.00280113	0.0397072								STAG3	-1.11735	3.36453	0.000246125	0.00926899
CHRND	2.25971	5.02471	1.12631e-11	4.16473e-08								PVRIG	-1.14612	4.38546	0.0011064	0.0227046
CHRNG	1.60695	3.43171	0.000443112	0.0129716								STAG3L5P-PVRIG2P-PILRB	-0.945593	3.24651	0.000770374	0.0176793
USP40	-0.613491	4.62344	0.00188621	0.0314225								EPHB4	-0.623584	3.84924	0.00417043	0.0495848
TCF15	-1.01884	3.11155	2.69782e-05	0.00245092								TMEM168	-0.635746	3.6011	0.000858359	0.0193139
HSPA12B	-0.723691	3.84553	0.00122871	0.0238978								CAV2	-0.89683	4.94602	0.00144206	0.0267952
GPCPD1	-0.989063	4.78744	1.64115e-06	0.000350102								CAV1	-0.788183	6.94281	0.0017485	0.0299785
C20orf26	2.30491	4.21786	1.57444e-12	1.05719e-08								AASS	-0.717256	4.10316	0.00217844	0.0341484
CD93	-0.944202	6.19223	0.000218292	0.00871049								POT1	-0.650416	2.68511	0.00141674	0.0265024
ACSS1	0.78636	5.54556	0.0028399	0.0399372								MGC27345	-0.941845	2.05892	0.000998354	0.0209521
ID1	-0.641359	4.70917	0.000539651	0.0145083								PODXL	-0.732453	5.66416	0.00428096	0.0499011
CCM2L	-0.985867	2.04604	0.000771366	0.0176793								DENND2A	-0.872796	2.92003	0.000475519	0.0135601
PHF20	0.500461	5.87968	0.000999156	0.0209521								FAM131B	-0.705531	2.68103	0.00260645	0.037944
PPP1R16B	-1.40664	3.50943	2.96253e-07	0.000107574								GIMAP8	-1.02121	3.74251	0.000175183	0.00741719
JPH2	0.759902	8.76932	0.00132334	0.025223								GIMAP7	-0.923481	3.39233	0.00326586	0.043439
ADA	-1.19757	2.43149	3.52673e-05	0.00287662								GIMAP4	-1.06254	3.81223	0.000138068	0.00635514
PCIF1	0.522456	5.35942	0.00103683	0.0215049								GIMAP6	-0.921978	4.80486	0.00017437	0.00741719
FAM65C	-1.17445	3.38697	1.2406e-05	0.00141066								GIMAP1	-0.899642	2.85846	0.00055194	0.0146827
DOK5	0.790868	4.89408	1.1042e-05	0.00130307								RBM33	-0.7035	5.89307	0.000737684	0.0171864
GNAS	0.478977	10.4033	0.00352727	0.0449747								SOX7	-0.797194	3.52155	0.00146906	0.0271153
ATP5E	-0.858694	5.30463	0.000662008	0.0164111								DLC1	-0.850235	4.43956	0.000386164	0.0117755
RPS21	-0.726789	6.53049	0.0014047	0.0263216								CSGALNACT1	-1.12425	3.12707	7.72792e-05	0.00441886
HELZ2	-0.775106	2.8079	0.00315492	0.0424727								LEPROTL1	-0.593263	3.5734	0.00159818	0.0285026
SLC2A4RG	0.711551	7.27307	0.000662776	0.0164111								TACC1	-0.959393	5.9975	0.00048548	0.0137735
JAM2	-0.99816	3.95878	0.000178107	0.00748388								IDO1	-0.821133	2.8913	0.00351156	0.0449293
CYYR1	-0.909872	4.24208	0.000111889	0.00564177								C8orf4	-1.43033	3.53173	5.59593e-11	1.55189e-07
MAP3K7CL	1.44573	4.64888	4.92096e-09	4.19909e-06								SOX17	-0.772269	1.77047	0.00138677	0.0261179
ITSN1	0.579783	5.20019	0.000959066	0.0206581								COPS5	-0.515221	6.14883	0.000936279	0.0203798
MRPS6	0.463388	4.8904	0.00289421	0.0403335								PREX2	-1.22843	2.38718	0.0040903	0.0489996
DOPEY2	0.586015	5.20113	0.00375147	0.0463935								FABP5	-1.16431	3.09987	2.04268e-05	0.00192029
CHAF1B	0.884558	4.24357	0.00128203	0.0246048								FABP4	-0.841182	5.28765	0.00390774	0.0474273
ERG	-1.15111	3.60494	5.01139e-05	0.00340813								LOC101926956	-0.962335	1.90044	0.00279742	0.0397072
MX1	-1.11899	3.17116	0.000309592	0.0101567								PDP1	-0.642761	6.34293	0.00340629	0.0443497
LSS	0.55198	5.45389	0.00168215	0.0293174								UQCRB	-0.724383	8.13862	0.000539094	0.0145083
DGCR14	0.598858	3.32986	0.00427126	0.0498748								NIPAL2	-0.930841	1.79073	0.00353255	0.0449903
CLDN5	-1.02693	4.64994	1.11471e-06	0.000281034								COX6C	-0.66824	7.25472	0.000239644	0.00926262
CRKL	0.451797	6.75822	0.00359481	0.0456738								FZD6	-1.10489	2.5794	0.0041884	0.0497029
TUG1	-0.68182	5.90492	0.000380655	0.011697								FAM91A1	-0.859962	2.68855	0.00333596	0.043742
LARGE	0.776091	5.97374	4.59873e-06	0.000675091								RNF139	-0.421091	4.80005	0.00381097	0.0468682
APOL3	-0.972015	4.12162	7.59185e-05	0.00436354								ASAP1	-0.89125	3.60856	0.000862651	0.0193712
FOXRED2	0.63929	3.24893	0.00402413	0.0485353								DENND3	-0.911338	3.1569	0.00297318	0.0410729
CARD10	-0.695917	3.539	0.00181239	0.0306945								GPIHBP1	-1.09036	4.76325	4.43891e-05	0.00330048
DDX17	-0.896294	7.94627	0.000103359	0.00533291								DMRT2	-1.56014	3.23572	9.98002e-10	1.23009e-06
PDGFB	-0.574354	4.37283	0.00314237	0.0424584								KIAA1432	-0.489048	4.5705	0.00327104	0.0434559
MGAT3	-0.818417	1.84791	0.00176872	0.0302445								RANBP6	-0.498679	4.95867	0.000490479	0.0138445
NDUFA6	-0.488952	6.98094	0.00426805	0.0498748								TEK	-1.05844	4.31131	5.77152e-05	0.00367951
CYB5R3	0.59158	7.04061	0.00012344	0.00587691								TOMM5	-0.550623	4.59564	0.00419313	0.0497029
LDOC1L	0.595263	4.93838	0.00369019	0.0462024								CBWD3	-0.680764	2.92388	0.000383987	0.0117668
KIAA0930	0.842524	5.62911	2.73969e-05	0.00245092								PTAR1	-0.713546	5.19372	9.36986e-05	0.0049732
FAM118A	-0.692569	4.11195	0.00339441	0.0442663								FRMD3	-0.601099	5.53988	0.000570898	0.0148531
PLXNB2	0.745207	3.70132	0.00268976	0.038851								SPTLC1	-0.704249	3.73838	0.000888335	0.0197877
SHANK3	-1.12308	5.18338	6.5157e-05	0.00394965								RP11-342C23.4	-1.49863	3.33718	0.000578679	0.0149634
BHLHE40	0.754491	6.55365	0.00320412	0.0427837								COL15A1	-0.611673	6.71497	0.00404745	0.0486439
LMCD1	0.612711	8.29209	0.000619813	0.0156619								PTBP3	-0.973075	3.52248	0.000261718	0.00960168
SRGAP3	0.921466	2.36677	0.000710266	0.0169312								COL27A1	-1.06203	3.78144	0.00059238	0.0152436
THUMPD3-AS1	-0.757106	2.53608	0.00151262	0.0275074								STOM	-0.84641	6.43544	7.92478e-05	0.00446933
SLC6A1	-1.19686	2.80255	9.25626e-05	0.00493652								ZBTB34	-0.649708	3.18952	0.00260087	0.0379126
MRPS25	-0.541637	5.92707	0.000131359	0.00614837								SH2D3C	-0.938471	4.10194	8.28241e-05	0.00452595
SH3BP5-AS1	-1.17911	3.04905	0.00215598	0.0339888								AIF1L	-0.732168	4.74803	0.000230361	0.00905816
CRTAP	0.482922	6.41115	0.00225848	0.0348952								EGFL7	-0.774689	4.90975	4.51059e-05	0.00330048
NKTR	-1.06897	5.90609	0.000261417	0.00960168								PTGDS	-0.78196	5.33114	0.000653572	0.0162558
KLHL40	0.708245	7.9384	0.00101656	0.0211967								RNR2	-0.484301	14.4201	0.00406233	0.0487699
ALS2CL	-0.860207	4.46454	0.000876357	0.0195602								TRNL1	-0.647921	8.24491	0.00273761	0.0392355
PTPN23	0.557287	4.99034	0.00277521	0.0395192								TRNM	-0.878474	5.2187	0.000110449	0.00559459
SCAP	0.499908	4.75167	0.000646196	0.0161084								TRNA	-1.17725	6.68318	0.00162336	0.0286915
MAP4	0.937647	10.1418	0.000541462	0.0145083								TRNN	-1.16387	7.75	0.000327655	0.0105008
PFKFB4	0.798891	2.53492	0.000623851	0.0156925								TRNC	-1.01612	7.5356	0.000238918	0.00926262
AMT	-0.790645	3.12288	0.00227561	0.0350116								TRNK	-0.763407	2.77853	0.000443185	0.0129716
RBM5-AS1	-1.35709	2.49734	0.000133785	0.00618367								TRNP	-0.556235	6.11546	0.000678445	0.0165761
CISH	1.20437	2.45473	0.000272523	0.00967909								P2RY8	-1.36792	2.26873	0.000151232	0.00681958
SEMA3G	-0.755001	4.32719	0.000715234	0.0169532								PRKX	-0.750765	1.90037	0.003734	0.0463325
CCDC66	-0.712576	2.74939	0.00121218	0.0236737								MOSPD2	-1.01815	1.84726	3.87789e-05	0.0030294
SLMAP	0.478554	7.01463	0.0024522	0.0367103								SCML1	-0.777711	4.51624	8.49527e-05	0.00460702
KCTD6	-0.711799	2.48508	0.00102102	0.02125								MAOA	-1.75449	4.52899	0.00107781	0.022182
SENP7	-0.71756	4.01411	0.000473949	0.0135601								CXorf36	-0.777378	4.33401	0.00171067	0.0295584
TRMT10C	-0.481353	4.50584	0.00176947	0.0302445								CLCN5	-1.00532	2.99647	4.46548e-05	0.00330048
NFKBIZ	-0.908621	2.05532	0.000762573	0.0175867								SHROOM4	-1.3822	3.62505	4.81297e-06	0.00068449
PHLDB2	-0.910846	3.17582	0.00157794	0.0281869								TRO	-1.12121	5.0076	7.55113e-08	3.80749e-05
ARHGAP31	-1.08429	3.78883	0.000116179	0.00569643								PFKFB1	-0.708413	5.74554	0.000124145	0.00588522
COX17	-0.688454	4.77885	0.000945242	0.0205197								MTRNR2L10	-0.526732	6.31951	0.00103715	0.0215049
PARP15	-1.36575	2.29507	0.00093696	0.0203798								KLF8	-1.11151	2.70277	0.000893775	0.0197897
HSPBAP1	-0.761022	3.4186	0.000205536	0.00838239								UQCRBP1	-0.856703	6.28319	0.000308449	0.0101567
LOC100129550	-0.762652	4.89109	0.00043326	0.0127902								ASB12	-0.50863	5.50814	0.0034656	0.0447022
CCDC14	-0.801711	3.16733	0.00330152	0.0435665								OGT	-0.791458	7.10658	0.000614948	0.0156619
KLF15	0.9325	6.03772	0.000173247	0.00741719								COX7B	-0.824511	7.78792	6.69215e-05	0.00398771
PLXNA1	0.751952	5.41777	0.00041711	0.0124253								ITM2A	-0.929809	5.13102	0.000559003	0.0147211
GATA2	-1.06885	2.9559	1.30737e-05	0.00146491								TIMM8A	-0.82577	2.07379	0.000322713	0.0104369
ATP2C1	-0.564005	5.28852	0.00304329	0.0417824								GPRASP1	-0.729009	3.0473	0.00342187	0.0444482
EPHB1	0.936622	2.89549	8.21264e-05	0.00452595								PLS3	-0.751812	5.66367	0.00228525	0.0350627
MRAS	0.542036	5.44191	0.00114316	0.0230147								RPL39	-0.782448	6.07953	0.00119899	0.0235593
SLC25A36	-0.641041	5.85801	0.000949194	0.0205653								ZBTB33	-0.491164	3.78237	0.00284777	0.0399372
RASA2	-0.968654	2.64952	0.00202969	0.0327734								MCTS1	-0.628341	4.03974	0.000706632	0.0168996
PLOD2	-0.845573	2.08388	0.00116644	0.0233363								ZNF449	-0.892798	2.95944	0.000634411	0.0158503
TM4SF1	-0.834146	5.46777	0.00111355	0.0227908								F8	-1.3042	5.43662	3.68683e-09	3.40816e-06
MME	-0.667867	5.99382	0.00177999	0.0303777								DDX3Y	-0.557307	5.33165	0.000268531	0.00960907
TIPARP	-0.680257	3.48017	0.00388955	0.0473958								UTY	-0.699986	3.89759	0.00272153	0.0391062
CCNL1	-0.84127	4.64039	0.0011396	0.0230044								TXLNG2P	-1.1905	2.82151	0.000246493	0.00926899
MLF1	-0.936168	6.60595	0.0016869	0.029322
RP11-3P17.4	-0.739823	5.91465	0.0003143	0.0101945
MECOM	-1.39773	2.99056	9.03313e-06	0.00112589
PLD1	-0.978928	2.06725	0.000378066	0.0116497
TNFSF10	-0.932639	4.34739	0.000313707	0.0101945
TTC14	-0.969068	3.84187	0.00130253	0.0248691
MCCC1	0.540393	4.54067	0.000782848	0.0178319
ABCC5	-1.01581	6.01486	3.3702e-07	0.00011329
CCDC50	-0.488913	5.46195	0.00253577	0.0375692
ATP5I	-0.569176	6.60428	0.00180304	0.0305828
PCGF3	-0.452089	4.76133	0.00337851	0.0441435
NAT8L	1.26417	3.48021	2.82368e-05	0.00250585
HTT	0.588728	5.64862	0.00179599	0.0305099
ABLIM2	0.869609	7.11755	0.000165404	0.00725226
HTRA3	-0.625578	5.66324	0.000510592	0.01416
TAPT1-AS1	-0.636941	5.81489	0.000500976	0.0139631
LDB2	-1.01114	3.85963	0.000377972	0.0116497
SOD3	0.981895	3.24655	0.000700578	0.0168579
SEPSECS	-0.677633	3.20467	0.00317278	0.0425696
ZCCHC4	-0.619993	2.92251	0.000681393	0.0165761
KLHL5	-0.820416	3.85139	0.000267362	0.00960907
RPL9	-0.692707	6.7545	0.00194627	0.0321279
LIMCH1	0.582534	8.71534	0.000298183	0.0101154
DCUN1D4	-0.906967	4.38251	1.08592e-05	0.00129528
LNX1	-0.905298	2.47007	0.00201675	0.0327421
PARM1	0.620879	5.59459	9.88835e-05	0.00517412
NUP54	-0.51616	4.07865	0.00155734	0.0280627
CNOT6L	-0.593151	4.17022	0.00252463	0.037491
SPARCL1	-0.813931	8.03122	0.00139518	0.0262317
GPRIN3	-1.18426	2.30623	4.37271e-05	0.00329976
DNAJB14	-0.789217	3.4748	0.00157247	0.0281346
EMCN	-1.43754	4.90128	5.75403e-08	3.29729e-05
RPL34	-0.753463	6.62388	0.000476737	0.0135601
SYNPO2	0.799134	10.9202	0.000561095	0.0147211
MYOZ2	0.892875	8.11158	0.00201821	0.0327421
NDNF	-1.61234	2.74538	6.72227e-05	0.00398771
ANKRD50	-0.841646	2.71944	9.46843e-05	0.00500159
MFSD8	-0.826942	3.09631	0.000117084	0.00569643
TBC1D9	-0.923982	2.59347	0.00247942	0.0370347
EDNRA	-0.785237	2.66062	0.00320502	0.0427837
ARHGAP10	0.451259	5.08422	0.0012739	0.0245762
RPS3A	-0.590903	7.14295	0.00231218	0.0353292
GUCY1A3	-1.13888	4.55535	4.06399e-05	0.00310909
GUCY1B3	-1.43123	3.04969	2.15644e-06	0.000405448
DDX60L	-0.93399	2.39345	0.00147554	0.0271896
TENM3	1.13917	3.26598	1.32097e-05	0.00146535
CDKN2AIP	-0.574511	3.4523	0.00106901	0.0220418
MYO10	-0.706586	4.08251	0.00199473	0.0326435
GUSBP1	-0.888045	2.47595	0.00192263	0.03188
GDNF	1.71552	2.97996	3.00622e-07	0.000107574
PRKAA1	-0.637863	4.96387	0.000989729	0.0209516
LOC100506548	0.632614	4.64982	0.000436006	0.0128292
RPL37	-0.690096	7.93926	0.000522759	0.0143223
OXCT1	1.2085	4.85006	3.09145e-05	0.0026584
HCN1	1.82031	3.41485	5.94481e-08	3.29729e-05
ITGA1	-1.45548	4.49204	1.80889e-06	0.000370256
ARL15	-0.941488	2.41526	0.00344156	0.0445995
PLK2	-1.0027	3.14802	0.00423462	0.0498748
PPWD1	-0.679773	3.64828	0.00234025	0.035611
SREK1	-0.857264	5.07262	2.01245e-06	0.000384898
MRPS36	-0.56953	4.40424	0.00156087	0.0280627
NSA2	-0.505423	5.27678	0.00393167	0.0476135
HMGCR	-0.699714	3.07823	0.000251621	0.00939808
PAPD4	-0.492213	4.27659	0.00374211	0.046378
MTX3	-0.693515	3.97745	0.000412226	0.012358
THBS4	1.42666	6.70571	0.00120901	0.0236535
ZFYVE16	-0.507719	4.78726	0.0031397	0.0424584
RASGRF2	-1.45709	3.24102	5.50305e-06	0.000772726
RPS23	-0.676561	8.35053	0.00119995	0.0235593
COX7C	-0.848146	8.14789	7.32116e-05	0.00425202
CCNH	-0.553413	3.55764	0.00216334	0.0340397
TMEM161B-AS1	-0.720309	3.01782	0.00049712	0.0138906
MEF2C	0.508759	9.4994	0.00199516	0.0326435
STARD4-AS1	-1.2897	3.47812	6.36602e-05	0.00394515
EPB41L4A	-0.905527	2.80497	0.00423887	0.0498748
YTHDC2	-0.420643	4.78508	0.0034479	0.0446296
SEMA6A	-1.33972	3.20088	1.08892e-06	0.000280915
PRR16	1.15138	4.13764	0.000256504	0.00951639
PPIC	-0.625526	4.5468	2.59624e-05	0.00238017
UQCRQ	-0.543663	7.90799	0.000467517	0.0135056
REEP2	-0.754297	4.10708	0.00126418	0.0244312
SPATA24	-0.717481	2.20241	0.000829441	0.0187525
ARAP3	-0.917179	3.63855	0.000515202	0.0142522
PCDH1	-0.870605	3.61872	3.51181e-05	0.00287662
PCDH12	-1.14969	3.28435	2.39345e-06	0.000442509
ABLIM3	-0.911448	5.78485	1.45417e-05	0.00152615
GRPEL2	-0.552065	3.48325	0.00398015	0.0480957
SLC36A2	-0.611283	6.09746	0.000993469	0.0209516
MFAP3	-0.482685	4.64585	0.002515	0.0374483
NEURL1B	-1.19398	5.09651	3.75054e-07	0.000118853
FLT4	-1.08265	3.04584	0.000132857	0.00616646
BTNL9	-1.2465	4.92711	5.44616e-07	0.000151036
TRIM52	-1.28265	2.13827	4.59673e-06	0.000675091
MYLK4	-1.60223	5.26504	1.39521e-05	0.00150263
FAM50B	0.540869	4.39925	0.00348168	0.0447742
NRN1	-0.92734	3.87736	0.000359334	0.0111969
NEDD9	-1.15982	4.66762	4.93418e-05	0.00339968
KDM1B	0.596652	4.08604	0.00040947	0.0123096
ZKSCAN8	-0.754842	4.53327	0.000992319	0.0209516
ZSCAN26	-0.538719	3.44488	0.00403193	0.0485627
GABBR1	-1.28479	2.91671	0.00426142	0.0498748
HLA-E	-0.728643	7.90487	0.000930734	0.0203642
ABCF1	0.482722	6.30761	0.00404335	0.0486439
DDR1	0.694027	5.12438	0.000491971	0.0138513
VARS	0.608298	5.37857	0.00371998	0.0463139
HSPA1A	0.603973	7.35699	0.00202104	0.0327421
HSPA1B	0.586276	7.21448	0.00329803	0.0435665
NOTCH4	-1.23488	4.65005	3.1186e-06	0.000556653
HLA-DRB5	-0.867264	4.10275	0.00113295	0.022934
HLA-DPA1	-0.976944	5.09164	0.00211235	0.0336128
RPS18	-0.561947	8.08393	0.00078148	0.0178319
UHRF1BP1	0.546428	5.51916	0.00234773	0.035627
ANKS1A	-0.844996	5.11592	7.30548e-05	0.00425202
PPARD	0.52126	4.92498	0.000545474	0.0145806
FANCE	0.875274	3.52534	9.16433e-05	0.00491111
CDKN1A	2.28289	3.43834	1.85295e-09	1.86862e-06
DAAM2	-1.02945	5.78339	4.6702e-05	0.00334324
PRPH2	0.992273	4.22208	1.9315e-05	0.00186314
PEX6	1.34283	4.88133	1.45408e-07	6.20389e-05
CUL7	0.648765	4.94638	0.000720568	0.0169822
VEGFA	-0.52489	6.75411	0.00143815	0.0267675
ENPP4	-0.741969	5.73198	2.92018e-05	0.00255067
GPR116	-1.32298	6.00122	1.22531e-06	0.000289198
RAB23	0.662281	3.83268	0.00028712	0.00993388
KCNQ5	0.963948	5.86427	9.79759e-06	0.00119434
CD109	-1.04192	2.74166	0.00208287	0.0332929
MYO6	-0.974384	2.94778	0.00329772	0.0435665
KIAA1009	-0.824387	1.67074	0.00374603	0.046378
PNISR	-1.01043	6.3168	3.92408e-05	0.00304404
SIM1	0.618935	4.45857	0.0013426	0.0255024
FOXO3	0.835287	6.6068	1.20537e-06	0.000289198
TUBE1	-1.0226	2.64836	0.000525976	0.0143711
FAM229B	-0.748108	2.4985	0.00269801	0.0389194
LAMA4	-0.733609	4.70025	0.00291237	0.0404342
VGLL2	0.743684	6.49879	0.00256938	0.037673
GJA1	-1.08097	3.59156	0.00165727	0.0290887
SMPDL3A	-0.500706	4.54491	0.000910894	0.0201286
EPB41L2	-0.974333	5.39584	0.00070487	0.0168996
MED23	-0.55139	3.93955	0.00184802	0.0310713
SLC18B1	-0.979427	2.2798	0.000279506	0.00978095
AHI1	-0.649781	2.75506	0.00275713	0.0393627
PDE7B	-0.717594	3.21571	0.000581629	0.0150047
HIVEP2	0.553225	6.38865	0.00351046	0.0449293
PHACTR2	-1.10795	4.57589	7.47196e-06	0.000975135
PLAGL1	-1.21368	3.42756	0.000463486	0.013431
STXBP5	0.532231	4.79329	0.000474714	0.0135601
SASH1	-0.900495	5.02311	0.000108337	0.00553817
RPS18P9	-0.544662	4.40015	0.00169221	0.0293308
MYCT1	-1.27174	3.89408	1.31911e-06	0.000304851
IGF2R	0.679002	7.4712	0.000433529	0.0127902
DKFZp451B082	1.55978	2.37147	0.000214166	0.0086294
MLLT4	-1.04735	5.34971	3.95608e-05	0.00304756
ZNF853	0.645904	5.6581	0.00348207	0.0447742
NDUFA4	-0.686008	8.53019	0.000210292	0.00854494
TSPAN13	-1.14308	2.9155	3.28016e-05	0.00275658
RPL23P8	-0.722297	5.29659	0.00244775	0.0366931
RAPGEF5	-0.982036	3.1462	0.000305494	0.0101212
TOMM7	-0.687727	7.26652	0.00271259	0.0390282
FAM126A	-0.813694	5.73112	0.000561347	0.0147211
OSBPL3	-1.85283	2.9043	2.82688e-07	0.000107574
SKAP2	0.887556	3.63708	0.000171516	0.00740322
CPVL	-0.695925	2.92736	0.00411977	0.049195
MTURN	0.706008	6.39597	0.000278464	0.00977531
INMT	-0.724633	3.71084	0.000631399	0.0158224
AQP1	-1.1453	8.03842	1.88794e-06	0.000370256
PKD1L1	-1.13375	2.37842	0.000619569	0.0156619
SEC61G	-0.739923	3.70781	0.00166353	0.029142
ZNF273	-1.23168	2.73253	0.00341767	0.0444457
AUTS2	0.960321	3.85373	0.000161254	0.00709837
STAG3L3	-0.867665	2.95533	5.98254e-05	0.00379204
GTF2IRD1	0.515658	5.07653	0.00362085	0.0458076
STAG3L2	-0.783516	2.90796	0.00119535	0.0235593
STAG3L1	-0.777383	3.11098	0.000328904	0.0105008
HSPB1	0.785689	9.24994	0.000295114	0.0100729
FGL2	-1.01273	4.26237	0.000717966	0.0169817
GSAP	-1.06699	2.55332	0.000262265	0.00960168
GNAI1	-0.881388	3.37715	0.000128795	0.00605393
DMTF1	-0.900625	4.22454	0.000407186	0.0122742
TP53TG1	-0.676324	3.53962	8.51384e-05	0.00460702
GATAD1	-1.14088	3.89837	1.96559e-05	0.00186361
CDK6	-1.03798	2.79537	0.0030745	0.0417958
GNG11	-0.926437	4.85413	0.000231348	0.00905816
SHFM1	-0.705342	4.44811	0.00423212	0.0498748
ZNF655	-0.617867	4.7098	0.00018249	0.00757784
STAG3	-1.11735	3.36453	0.000246125	0.00926899
PVRIG	-1.14612	4.38546	0.0011064	0.0227046
STAG3L5P-PVRIG2P-PILRB	-0.945593	3.24651	0.000770374	0.0176793
LRCH4	0.458377	4.37492	0.00420847	0.0497897
EPHB4	-0.623584	3.84924	0.00417043	0.0495848
CUX1	0.525867	6.25343	0.00409995	0.0490623
TMEM168	-0.635746	3.6011	0.000858359	0.0193139
CAV2	-0.89683	4.94602	0.00144206	0.0267952
CAV1	-0.788183	6.94281	0.0017485	0.0299785
AASS	-0.717256	4.10316	0.00217844	0.0341484
POT1	-0.650416	2.68511	0.00141674	0.0265024
SND1	0.455609	5.21293	0.00202225	0.0327421
MGC27345	-0.941845	2.05892	0.000998354	0.0209521
STRIP2	0.507976	5.60565	0.000302844	0.0101212
PODXL	-0.732453	5.66416	0.00428096	0.0499011
DENND2A	-0.872796	2.92003	0.000475519	0.0135601
TMEM178B	1.05449	3.71207	0.000392731	0.0119358
FAM131B	-0.705531	2.68103	0.00260645	0.037944
ZYX	0.456246	5.389	0.0037032	0.0462088
GIMAP8	-1.02121	3.74251	0.000175183	0.00741719
GIMAP7	-0.923481	3.39233	0.00326586	0.043439
GIMAP4	-1.06254	3.81223	0.000138068	0.00635514
GIMAP6	-0.921978	4.80486	0.00017437	0.00741719
GIMAP1	-0.899642	2.85846	0.00055194	0.0146827
RBM33	-0.7035	5.89307	0.000737684	0.0171864
DNAJB6	0.55522	7.92287	0.00306266	0.0417922
MYOM2	1.2639	9.789	9.34707e-08	4.50813e-05
SOX7	-0.797194	3.52155	0.00146906	0.0271153
CTSB	0.560564	7.36065	0.000403625	0.0122
DLC1	-0.850235	4.43956	0.000386164	0.0117755
PCM1	0.521148	7.86067	0.00155229	0.0280449
CSGALNACT1	-1.12425	3.12707	7.72792e-05	0.00441886
RHOBTB2	0.560513	4.77667	0.000313444	0.0101945
PTK2B	0.651659	2.72468	0.00214651	0.0339192
LEPROTL1	-0.593263	3.5734	0.00159818	0.0285026
TACC1	-0.959393	5.9975	0.00048548	0.0137735
IDO1	-0.821133	2.8913	0.00351156	0.0449293
C8orf4	-1.43033	3.53173	5.59593e-11	1.55189e-07
SOX17	-0.772269	1.77047	0.00138677	0.0261179
COPS5	-0.515221	6.14883	0.000936279	0.0203798
PREX2	-1.22843	2.38718	0.0040903	0.0489996
JPH1	0.526733	8.72664	0.00189018	0.031436
FABP5	-1.16431	3.09987	2.04268e-05	0.00192029
FABP4	-0.841182	5.28765	0.00390774	0.0474273
CA3	0.702472	12.1771	0.000518793	0.0143158
LOC101926956	-0.962335	1.90044	0.00279742	0.0397072
PDP1	-0.642761	6.34293	0.00340629	0.0443497
UQCRB	-0.724383	8.13862	0.000539094	0.0145083
NIPAL2	-0.930841	1.79073	0.00353255	0.0449903
COX6C	-0.66824	7.25472	0.000239644	0.00926262
FZD6	-1.10489	2.5794	0.0041884	0.0497029
DERL1	0.433089	5.64291	0.00296957	0.0410729
FAM91A1	-0.859962	2.68855	0.00333596	0.043742
RNF139	-0.421091	4.80005	0.00381097	0.0468682
FAM49B	0.477343	5.13529	0.00385921	0.0472519
ASAP1	-0.89125	3.60856	0.000862651	0.0193712
KHDRBS3	0.605842	4.33986	0.00227325	0.0350116
DENND3	-0.911338	3.1569	0.00297318	0.0410729
GPIHBP1	-1.09036	4.76325	4.43891e-05	0.00330048
MAFA	0.813061	4.96567	0.000669343	0.016427
ZC3H3	0.741133	4.22188	0.00195109	0.0321597
PARP10	0.989319	4.36231	5.52572e-10	8.75669e-07
GRINA	0.542285	5.84853	0.000273383	0.00967909
SCXB	1.01015	2.55538	0.000125264	0.00591298
DMRT2	-1.56014	3.23572	9.98002e-10	1.23009e-06
KIAA1432	-0.489048	4.5705	0.00327104	0.0434559
RANBP6	-0.498679	4.95867	0.000490479	0.0138445
CDKN2B	0.96316	2.69338	0.00100397	0.0210133
TEK	-1.05844	4.31131	5.77152e-05	0.00367951
UBAP2	0.634704	5.65167	0.000575571	0.0149178
LINC00950	0.698516	1.75956	0.00211804	0.0336128
TOMM5	-0.550623	4.59564	0.00419313	0.0497029
CBWD3	-0.680764	2.92388	0.000383987	0.0117668
PTAR1	-0.713546	5.19372	9.36986e-05	0.0049732
PRUNE2	1.53299	2.63473	0.00203436	0.0328012
TLE1	0.979913	6.09987	4.07141e-07	0.000118853
FRMD3	-0.601099	5.53988	0.000570898	0.0148531
SPTLC1	-0.704249	3.73838	0.000888335	0.0197877
RP11-342C23.4	-1.49863	3.33718	0.000578679	0.0149634
HABP4	0.683352	3.33395	0.000785624	0.0178584
COL15A1	-0.611673	6.71497	0.00404745	0.0486439
PTBP3	-0.973075	3.52248	0.000261718	0.00960168
COL27A1	-1.06203	3.78144	0.00059238	0.0152436
STOM	-0.84641	6.43544	7.92478e-05	0.00446933
MVB12B	0.787734	5.57266	0.000368855	0.0114294
ZBTB34	-0.649708	3.18952	0.00260087	0.0379126
SH2D3C	-0.938471	4.10194	8.28241e-05	0.00452595
LINC00963	0.961574	1.90604	0.000530492	0.0144588
AIF1L	-0.732168	4.74803	0.000230361	0.00905816
RAPGEF1	0.564341	7.77644	0.00332231	0.043742
BRD3	0.522628	4.6171	0.00372442	0.0463172
CAMSAP1	0.580069	6.27542	0.00211631	0.0336128
EGFL7	-0.774689	4.90975	4.51059e-05	0.00330048
PTGDS	-0.78196	5.33114	0.000653572	0.0162558
NELFB	0.472695	5.45831	0.00411991	0.049195
RNR2	-0.484301	14.4201	0.00406233	0.0487699
TRNL1	-0.647921	8.24491	0.00273761	0.0392355
TRNM	-0.878474	5.2187	0.000110449	0.00559459
TRNA	-1.17725	6.68318	0.00162336	0.0286915
TRNN	-1.16387	7.75	0.000327655	0.0105008
TRNC	-1.01612	7.5356	0.000238918	0.00926262
TRNK	-0.763407	2.77853	0.000443185	0.0129716
TRNP	-0.556235	6.11546	0.000678445	0.0165761
P2RY8	-1.36792	2.26873	0.000151232	0.00681958
PRKX	-0.750765	1.90037	0.003734	0.0463325
MOSPD2	-1.01815	1.84726	3.87789e-05	0.0030294
SCML1	-0.777711	4.51624	8.49527e-05	0.00460702
TSPAN7	0.456863	7.46118	0.00256108	0.0376292
MAOA	-1.75449	4.52899	0.00107781	0.022182
CXorf36	-0.777378	4.33401	0.00171067	0.0295584
USP11	0.667808	4.74308	6.0164e-05	0.00379204
PPP1R3F	0.632352	4.84719	0.00151772	0.0275106
CLCN5	-1.00532	2.99647	4.46548e-05	0.00330048
SHROOM4	-1.3822	3.62505	4.81297e-06	0.00068449
MAGED1	0.575761	5.51005	0.00267636	0.038809
MAGED2	0.586183	6.0774	6.1932e-05	0.00385962
TRO	-1.12121	5.0076	7.55113e-08	3.80749e-05
PFKFB1	-0.708413	5.74554	0.000124145	0.00588522
MTRNR2L10	-0.526732	6.31951	0.00103715	0.0215049
KLF8	-1.11151	2.70277	0.000893775	0.0197897
UQCRBP1	-0.856703	6.28319	0.000308449	0.0101567
ASB12	-0.50863	5.50814	0.0034656	0.0447022
OGT	-0.791458	7.10658	0.000614948	0.0156619
COX7B	-0.824511	7.78792	6.69215e-05	0.00398771
ITM2A	-0.929809	5.13102	0.000559003	0.0147211
TIMM8A	-0.82577	2.07379	0.000322713	0.0104369
GPRASP1	-0.729009	3.0473	0.00342187	0.0444482
MUM1L1	0.778687	4.25403	5.10006e-05	0.00340813
CXorf57	1.0147	1.69291	0.00015762	0.0069939
PLS3	-0.751812	5.66367	0.00228525	0.0350627
RPL39	-0.782448	6.07953	0.00119899	0.0235593
ZBTB33	-0.491164	3.78237	0.00284777	0.0399372
ATP1B4	0.464855	6.38097	0.00149052	0.0273131
MCTS1	-0.628341	4.03974	0.000706632	0.0168996
APLN	0.869309	1.90712	0.00164955	0.0289992
ZNF449	-0.892798	2.95944	0.000634411	0.0158503
HTATSF1	0.574279	7.2529	0.00161862	0.0286827
BGN	0.907309	3.57369	0.0011808	0.0234922
SRPK3	0.591409	7.17795	0.000830024	0.0187525
PLXNA3	0.954301	2.76004	0.00426723	0.0498748
F8	-1.3042	5.43662	3.68683e-09	3.40816e-06
DDX3Y	-0.557307	5.33165	0.000268531	0.00960907
UTY	-0.699986	3.89759	0.00272153	0.0391062
TXLNG2P	-1.1905	2.82151	0.000246493	0.00926899

## Sheet: BL.Y vs CON.Y
All differentially expressed genes						Up-regulated genes						Down-regulated genes
	logFC	logCPM	PValue	FDR		Gene	logFC	logCPM	PValue	FDR		Gene	logFC	logCPM	PValue	FDR
PER3	-1.7518	5.59753	1.16154e-11	1.81399e-08		ERRFI1	1.53776	4.3264	1.35318e-05	0.00155715		PER3	-1.7518	5.59753	1.16154e-11	1.81399e-08
ERRFI1	1.53776	4.3264	1.35318e-05	0.00155715		TNFRSF1B	0.962458	4.5119	8.05106e-05	0.00624214		TMEM57	-0.695783	5.42153	0.00112881	0.044072
TNFRSF1B	0.962458	4.5119	8.05106e-05	0.00624214		SRSF10	1.15259	5.9995	0.000968198	0.040709		TESK2	-1.20764	2.8286	0.000107646	0.00769145
SRSF10	1.15259	5.9995	0.000968198	0.040709		ZC3H12A	1.32416	2.56833	0.000883956	0.0383469		FAM46C	-1.85563	4.82933	1.34928e-10	1.34094e-07
TMEM57	-0.695783	5.42153	0.00112881	0.044072		KCNQ4	2.02284	3.69132	1.27405e-06	0.000224644		CA14	-1.25279	3.51302	0.000388091	0.021646
ZC3H12A	1.32416	2.56833	0.000883956	0.0383469		OSBPL9	1.22192	6.66869	0.000228744	0.01397		C1orf51	-2.39892	3.84502	1.19604e-08	4.43855e-06
KCNQ4	2.02284	3.69132	1.27405e-06	0.000224644		COA7	0.81256	4.44436	0.00110602	0.0436802		TMCC2	-1.69728	3.55772	2.13395e-09	9.75559e-07
TESK2	-1.20764	2.8286	0.000107646	0.00769145		IL12RB2	1.58293	2.79964	0.000259602	0.0154237		MPP7	-1.06697	4.84592	8.42933e-05	0.0064894
OSBPL9	1.22192	6.66869	0.000228744	0.01397		GADD45A	2.49985	4.0862	1.21804e-08	4.43855e-06		RHOBTB1	-1.05947	7.78119	0.000252343	0.0151572
COA7	0.81256	4.44436	0.00110602	0.0436802		NEXN	0.805095	9.10523	0.000904493	0.0389288		SGPL1	-0.91018	3.81039	0.000416315	0.0225305
IL12RB2	1.58293	2.79964	0.000259602	0.0154237		DNAJB4	2.15337	8.08131	0.000159527	0.0105694		DDIT4	-1.34812	5.69162	0.000248039	0.014981
GADD45A	2.49985	4.0862	1.21804e-08	4.43855e-06		CYR61	2.1446	5.70752	8.7845e-05	0.00671117		CPEB3	-0.726702	5.50675	0.000846152	0.0371841
NEXN	0.805095	9.10523	0.000904493	0.0389288		LRRC8B	1.57115	3.98008	0.000224187	0.0137686		LBX1	-1.14086	3.71578	0.00106574	0.0429914
DNAJB4	2.15337	8.08131	0.000159527	0.0105694		GPSM2	2.27114	4.22109	3.5892e-06	0.000523162		LBX1-AS1	-1.2954	3.59873	0.00010741	0.00769145
CYR61	2.1446	5.70752	8.7845e-05	0.00671117		SORT1	0.843385	7.41531	0.000122234	0.00841965		PITX3	-1.19891	3.27589	0.00127102	0.0484139
LRRC8B	1.57115	3.98008	0.000224187	0.0137686		KCNC4	1.28435	3.20009	0.00065648	0.0306377		VSIG10	-0.818223	4.76398	0.000396362	0.0216652
GPSM2	2.27114	4.22109	3.5892e-06	0.000523162		RNF115	1.34193	6.57286	4.18046e-05	0.00368554		NFKBIA	-0.801539	5.41528	0.000695626	0.0320869
SORT1	0.843385	7.41531	0.000122234	0.00841965		NUDT4P2	1.55088	6.24647	3.08779e-05	0.00286066		CTAGE5	-0.885053	5.25964	0.000175867	0.0112431
KCNC4	1.28435	3.20009	0.00065648	0.0306377		NUDT4P1	1.54734	6.2506	5.91246e-05	0.00494051		RASL12	-0.714719	4.4963	0.000879835	0.0383201
FAM46C	-1.85563	4.82933	1.34928e-10	1.34094e-07		IL6R	1.60295	5.67857	4.61954e-07	0.000101002		KBTBD13	-0.949445	4.93724	0.000498085	0.0252087
RNF115	1.34193	6.57286	4.18046e-05	0.00368554		PPFIA4	1.43446	6.05411	6.60408e-05	0.00534783		SEC14L5	-1.29636	2.65713	0.000474199	0.0246578
NUDT4P2	1.55088	6.24647	3.08779e-05	0.00286066		MYOG	1.07264	6.39641	0.00052377	0.0261455		AC137932.6	-0.988203	2.16933	0.000532473	0.0263031
NUDT4P1	1.54734	6.2506	5.91246e-05	0.00494051		RASSF5	1.60583	2.81682	3.78898e-06	0.000545015		PER1	-1.65847	6.72867	2.14679e-07	4.99333e-05
CA14	-1.25279	3.51302	0.000388091	0.021646		ATF3	5.01142	7.10883	2.23097e-09	9.75559e-07		HLF	-1.15242	3.75354	2.59257e-05	0.00253053
C1orf51	-2.39892	3.84502	1.19604e-08	4.43855e-06		ESRRG	2.07815	5.15559	8.10733e-08	2.16169e-05		UBALD2	-0.844589	4.71952	0.0011351	0.04416
IL6R	1.60295	5.67857	4.61954e-07	0.000101002		TGFB2	2.14897	5.12275	2.0602e-09	9.75559e-07		AQP4	-1.20642	6.61952	2.65045e-05	0.00254931
PPFIA4	1.43446	6.05411	6.60408e-05	0.00534783		ENAH	3.18366	8.09058	1.51062e-09	8.25707e-07		SERTAD3	-0.76554	3.56057	0.0013124	0.0496494
MYOG	1.07264	6.39641	0.00052377	0.0261455		WNT9A	2.1011	3.13429	8.9601e-05	0.00671117		DBP	-1.63973	3.98768	5.64716e-08	1.58294e-05
TMCC2	-1.69728	3.55772	2.13395e-09	9.75559e-07		IDI1	1.05857	6.32988	0.000174734	0.0112431		LGALSL	-1.06158	5.76731	3.38676e-05	0.00311127
RASSF5	1.60583	2.81682	3.78898e-06	0.000545015		AKR1C1	0.938238	4.9247	0.00132189	0.0498307		NPHP1	-1.45987	5.04616	1.70898e-06	0.000291916
ATF3	5.01142	7.10883	2.23097e-09	9.75559e-07		OTUD1	3.5621	8.29367	7.66194e-07	0.000155112		ITGB6	-0.976354	7.23192	4.54888e-06	0.000637542
ESRRG	2.07815	5.15559	8.10733e-08	2.16169e-05		C10orf10	1.24639	4.76244	0.0002682	0.0156789		MSTN	-1.42549	4.32039	0.000741629	0.033641
TGFB2	2.14897	5.12275	2.0602e-09	9.75559e-07		CHST3	1.62615	4.92244	6.26528e-09	2.53674e-06		NDRG3	-0.809276	3.89765	0.00125928	0.0483032
ENAH	3.18366	8.09058	1.51062e-09	8.25707e-07		P4HA1	0.873266	5.90368	0.00087871	0.0383201		TEF	-1.41299	5.92656	8.53223e-06	0.00105994
WNT9A	2.1011	3.13429	8.9601e-05	0.00671117		USP54	1.01291	7.13124	0.00023512	0.0142796		TOB2	-1.03954	6.67778	0.000181912	0.011562
IDI1	1.05857	6.32988	0.000174734	0.0112431		DLG5	0.818511	5.33326	0.000630249	0.0298247		PLCL2	-0.906978	5.62791	1.17159e-05	0.00137719
AKR1C1	0.938238	4.9247	0.00132189	0.0498307		ZMIZ1	0.755954	5.51454	0.000523108	0.0261455		NR1D2	-1.34612	6.6009	3.73808e-08	1.10445e-05
OTUD1	3.5621	8.29367	7.66194e-07	0.000155112		BMPR1A	0.946147	4.41693	5.81924e-06	0.000766457		ACVR2B	-0.906011	4.11436	0.000735305	0.0334932
MPP7	-1.06697	4.84592	8.42933e-05	0.0064894		ANKRD1	6.33533	10.526	3.4605e-14	7.56603e-11		DUSP7	-0.849618	4.63694	0.000711844	0.0325602
C10orf10	1.24639	4.76244	0.0002682	0.0156789		RRP12	1.45465	5.56141	0.000497224	0.0252087		ASB14	-0.802046	5.64541	7.46682e-05	0.00583052
RHOBTB1	-1.05947	7.78119	0.000252343	0.0151572		ANKRD2	1.50894	7.30417	0.00120147	0.0465762		PDZRN3	-0.772226	6.05258	0.00110699	0.0436802
SGPL1	-0.91018	3.81039	0.000416315	0.0225305		NFKB2	0.859176	3.5222	0.000804058	0.0360244		KY	-2.13145	4.01288	2.08971e-05	0.00215516
CHST3	1.62615	4.92244	6.26528e-09	2.53674e-06		RBM20	1.31719	5.45402	1.18125e-06	0.000218872		P2RY1	-0.88047	3.52654	0.00126848	0.0484139
DDIT4	-1.34812	5.69162	0.000248039	0.014981		PLEKHA1	0.859163	5.31342	0.000122459	0.00841965		SKIL	-0.717008	4.81943	0.000641684	0.0301068
P4HA1	0.873266	5.90368	0.00087871	0.0383201		CHST15	2.18425	4.99623	1.78987e-07	4.25367e-05		GAB1	-1.53184	5.43902	3.24722e-06	0.000483781
USP54	1.01291	7.13124	0.00023512	0.0142796		DUSP8	1.84432	4.10547	0.000400275	0.0217702		NR3C2	-0.921216	4.43769	2.31055e-05	0.00233879
DLG5	0.818511	5.33326	0.000630249	0.0298247		AMPD3	2.28208	5.276	9.6928e-06	0.00116441		GLRB	-0.85885	2.0104	0.00121187	0.0468134
ZMIZ1	0.755954	5.51454	0.000523108	0.0261455		ARNTL	2.34254	3.73356	5.22077e-10	3.56709e-07		RGMB	-0.793219	5.16709	6.82896e-05	0.00547812
BMPR1A	0.946147	4.41693	5.81924e-06	0.000766457		RRAS2	1.10324	4.96504	0.00050429	0.0254051		SLC12A2	-1.40362	5.58242	2.74603e-08	8.8293e-06
ANKRD1	6.33533	10.526	3.4605e-14	7.56603e-11		SLC3A2	0.830192	5.31788	1.99156e-05	0.00209343		CXXC5	-1.0526	5.72647	2.18653e-05	0.00223393
CPEB3	-0.726702	5.50675	0.000846152	0.0371841		PANX1	1.65527	5.69081	9.12437e-05	0.00678555		ARHGEF37	-0.8056	5.01468	0.000531588	0.0263031
RRP12	1.45465	5.56141	0.000497224	0.0252087		ENDOD1	1.0198	7.42476	1.64159e-05	0.00177682		MYLIP	-0.683217	5.469	0.00124273	0.0478362
ANKRD2	1.50894	7.30417	0.00120147	0.0465762		SIK2	1.49391	5.15233	2.9687e-06	0.000463626		CDCA7L	-1.10985	1.81798	0.000846948	0.0371841
LBX1	-1.14086	3.71578	0.00106574	0.0429914		PPP2R1B	0.896106	4.07676	6.1701e-05	0.00508887		HOXA11	-1.1211	2.66503	0.000984745	0.041226
LBX1-AS1	-1.2954	3.59873	0.00010741	0.00769145		USP28	1.51227	7.29653	8.78107e-07	0.000171419		KBTBD2	-0.969934	6.40816	1.37245e-05	0.00156287
PITX3	-1.19891	3.27589	0.00127102	0.0484139		NNMT	2.59598	3.72131	2.0814e-05	0.00215516		FAM131B	-1.08069	2.64486	0.000293031	0.0168601
NFKB2	0.859176	3.5222	0.000804058	0.0360244		SCN3B	1.31761	4.31993	6.86519e-05	0.00547812		PDP1	-1.43882	6.17566	9.50581e-08	2.41669e-05
RBM20	1.31719	5.45402	1.18125e-06	0.000218872		GABARAPL1	1.28412	7.2336	1.68042e-07	4.08231e-05		ANGPT1	-1.02942	5.06366	7.1242e-05	0.005603
PLEKHA1	0.859163	5.31342	0.000122459	0.00841965		DUSP16	0.815474	4.89427	0.000565317	0.0274669		TRIB1	-0.764796	5.80924	0.000367694	0.0206135
CHST15	2.18425	4.99623	1.78987e-07	4.25367e-05		RASSF8	1.01061	5.7753	0.000107303	0.00769145		MOB3B	-1.22522	3.08842	0.000222535	0.0137444
DUSP8	1.84432	4.10547	0.000400275	0.0217702		SLC38A1	1.91521	6.34469	1.61886e-11	2.21217e-08		GADD45G	-2.10585	5.59472	4.28618e-06	0.000608526
AMPD3	2.28208	5.276	9.6928e-06	0.00116441		METTL1	1.06887	2.16096	0.00112058	0.0439076		FAM78A	-1.09263	5.55639	0.000947337	0.0402161
ARNTL	2.34254	3.73356	5.22077e-10	3.56709e-07		OSBPL8	1.65571	5.3835	5.89435e-07	0.000123917		MID1IP1	-1.09007	6.50656	0.000175002	0.0112431
RRAS2	1.10324	4.96504	0.00050429	0.0254051		ATP2B1	0.663465	5.29167	0.000476454	0.0246578
SLC3A2	0.830192	5.31788	1.99156e-05	0.00209343		NUDT4	1.60985	6.73442	4.36499e-05	0.00381745
PANX1	1.65527	5.69081	9.12437e-05	0.00678555		NT5DC3	1.17837	3.81826	0.000221137	0.0137356
ENDOD1	1.0198	7.42476	1.64159e-05	0.00177682		CRY1	1.28723	4.31818	2.77726e-05	0.00264009
SIK2	1.49391	5.15233	2.9687e-06	0.000463626		PPTC7	0.793874	7.222	0.00039476	0.0216652
PPP2R1B	0.896106	4.07676	6.1701e-05	0.00508887		SH2B3	0.979654	4.57369	0.000108645	0.00771235
USP28	1.51227	7.29653	8.78107e-07	0.000171419		HSPB8	1.58824	10.1063	4.74609e-06	0.00065636
NNMT	2.59598	3.72131	2.0814e-05	0.00215516		RNF34	1.0374	5.94642	6.37667e-06	0.000810579
SCN3B	1.31761	4.31993	6.86519e-05	0.00547812		CLIP1	0.971731	8.76151	0.000452822	0.0237993
GABARAPL1	1.28412	7.2336	1.68042e-07	4.08231e-05		SLC15A4	0.875028	5.30871	0.000188099	0.0118178
DUSP16	0.815474	4.89427	0.000565317	0.0274669		SLC7A1	1.49635	2.58493	0.00105425	0.0429914
RASSF8	1.01061	5.7753	0.000107303	0.00769145		KLF5	1.23848	3.3309	0.00111078	0.0436802
SLC38A1	1.91521	6.34469	1.61886e-11	2.21217e-08		LINC00346	1.02766	6.06269	0.000440544	0.023608
METTL1	1.06887	2.16096	0.00112058	0.0439076		LOC101928841	3.07552	8.39865	3.27477e-06	0.000483781
OSBPL8	1.65571	5.3835	5.89435e-07	0.000123917		SPTSSA	1.03154	4.99276	9.35899e-07	0.000179496
ATP2B1	0.663465	5.29167	0.000476454	0.0246578		RALGAPA1	0.611109	4.73285	0.00107346	0.0431436
NUDT4	1.60985	6.73442	4.36499e-05	0.00381745		ERO1L	1.31093	3.69431	4.80322e-06	0.00065636
NT5DC3	1.17837	3.81826	0.000221137	0.0137356		RAB15	2.51009	3.73441	2.44557e-10	2.05654e-07
CRY1	1.28723	4.31818	2.77726e-05	0.00264009		FOS	2.50059	4.29307	0.000395829	0.0216652
PPTC7	0.793874	7.222	0.00039476	0.0216652		C14orf132	1.10103	2.57325	0.000559524	0.0273068
SH2B3	0.979654	4.57369	0.000108645	0.00771235		CEP170B	0.996815	3.05933	0.000254042	0.0151759
VSIG10	-0.818223	4.76398	0.000396362	0.0216652		ACTC1	3.16012	6.28298	2.20714e-08	7.78336e-06
HSPB8	1.58824	10.1063	4.74609e-06	0.00065636		NEDD4	1.04311	7.77925	0.000167272	0.0108847
RNF34	1.0374	5.94642	6.37667e-06	0.000810579		CSPG4	1.08524	4.41331	2.45215e-05	0.00245935
CLIP1	0.971731	8.76151	0.000452822	0.0237993		ALPK3	1.35323	9.87458	0.000288832	0.0167064
SLC15A4	0.875028	5.30871	0.000188099	0.0118178		AEN	2.00804	3.53288	1.10504e-05	0.00131308
SLC7A1	1.49635	2.58493	0.00105425	0.0429914		ABHD2	1.6785	6.46098	1.3052e-07	3.24282e-05
KLF5	1.23848	3.3309	0.00111078	0.0436802		ZNF774	2.13243	2.85684	2.31336e-08	7.90301e-06
LINC00346	1.02766	6.06269	0.000440544	0.023608		GABARAPL3	1.16138	2.57773	0.000988037	0.041226
LOC101928841	3.07552	8.39865	3.27477e-06	0.000483781		RHBDF1	0.788915	4.39191	0.000891486	0.0385207
SPTSSA	1.03154	4.99276	9.35899e-07	0.000179496		TNFRSF12A	4.89285	6.3201	7.74325e-20	4.23246e-16
NFKBIA	-0.801539	5.41528	0.000695626	0.0320869		THOC6	1.12403	3.33247	1.54643e-05	0.00169056
RALGAPA1	0.611109	4.73285	0.00107346	0.0431436		SNN	0.886417	6.10707	0.000571512	0.027645
CTAGE5	-0.885053	5.25964	0.000175867	0.0112431		SMG1	0.785043	7.6112	0.000704343	0.0323524
ERO1L	1.31093	3.69431	4.80322e-06	0.00065636		LOC100271836	1.12319	3.86632	2.54528e-05	0.00252955
RAB15	2.51009	3.73441	2.44557e-10	2.05654e-07		SMG1P1	0.759359	4.20886	0.00105861	0.0429914
FOS	2.50059	4.29307	0.000395829	0.0216652		ARHGAP17	0.75266	4.97435	0.000150764	0.0101114
C14orf132	1.10103	2.57325	0.000559524	0.0273068		CYLD	0.9481	5.969	0.000632942	0.0298247
CEP170B	0.996815	3.05933	0.000254042	0.0151759		CES3	1.43588	5.04303	9.73542e-05	0.00714279
ACTC1	3.16012	6.28298	2.20714e-08	7.78336e-06		CD68	1.28719	2.92206	0.00100864	0.0415246
NEDD4	1.04311	7.77925	0.000167272	0.0108847		PMP22	1.38075	6.31904	1.23884e-06	0.000222557
RASL12	-0.714719	4.4963	0.000879835	0.0383201		SOCS7	1.60938	5.71169	3.02214e-09	1.27069e-06
KBTBD13	-0.949445	4.93724	0.000498085	0.0252087		MAP3K14	1.11404	4.30143	0.000332307	0.0190198
CSPG4	1.08524	4.41331	2.45215e-05	0.00245935		PPP1R27	1.98153	8.75786	1.24186e-06	0.000222557
ALPK3	1.35323	9.87458	0.000288832	0.0167064		SOCS6	0.986303	5.56011	8.89641e-05	0.00671117
AEN	2.00804	3.53288	1.10504e-05	0.00131308		UBA2	0.734658	6.5242	0.000395786	0.0216652
ABHD2	1.6785	6.46098	1.3052e-07	3.24282e-05		PVR	1.241	5.7353	0.00100473	0.0415246
ZNF774	2.13243	2.85684	2.31336e-08	7.90301e-06		KLHL29	1.48228	3.42942	5.98538e-06	0.000772697
GABARAPL3	1.16138	2.57773	0.000988037	0.041226		CRIM1	1.34286	6.72478	8.42593e-10	5.11735e-07
RHBDF1	0.788915	4.39191	0.000891486	0.0385207		CDC42EP3	0.926665	5.41575	0.000797734	0.0358882
TNFRSF12A	4.89285	6.3201	7.74325e-20	4.23246e-16		EIF2AK3	2.04949	4.00237	2.10721e-06	0.000349358
THOC6	1.12403	3.33247	1.54643e-05	0.00169056		ARID5A	1.97648	5.29094	7.26691e-07	0.00014989
SEC14L5	-1.29636	2.65713	0.000474199	0.0246578		IL1R1	1.47261	4.91627	8.96296e-05	0.00671117
SNN	0.886417	6.10707	0.000571512	0.027645		LIMS1	1.14938	6.40248	2.65845e-05	0.00254931
SMG1	0.785043	7.6112	0.000704343	0.0323524		LIMS3	1.29196	2.13462	0.000591279	0.0284751
LOC100271836	1.12319	3.86632	2.54528e-05	0.00252955		LIMS3L	1.35757	3.69715	1.18853e-05	0.00138224
SMG1P1	0.759359	4.20886	0.00105861	0.0429914		RND3	2.48034	4.98997	2.63677e-06	0.000423899
ARHGAP17	0.75266	4.97435	0.000150764	0.0101114		FMNL2	1.32668	5.31648	0.000162239	0.0106687
CYLD	0.9481	5.969	0.000632942	0.0298247		XIRP2	1.48821	12.112	0.000929429	0.0396895
CES3	1.43588	5.04303	9.73542e-05	0.00714279		ZNF385B	1.80874	3.64606	9.4102e-05	0.00695083
AC137932.6	-0.988203	2.16933	0.000532473	0.0263031		MARS2	0.95242	3.60878	0.00108774	0.0433985
CD68	1.28719	2.92206	0.00100864	0.0415246		C2orf69	0.966523	4.31811	4.03874e-05	0.00358956
PER1	-1.65847	6.72867	2.14679e-07	4.99333e-05		ACSL3	1.12955	6.07584	3.14763e-08	9.55832e-06
PMP22	1.38075	6.31904	1.23884e-06	0.000222557		DGKD	1.37735	7.08106	3.03105e-06	0.000466696
SOCS7	1.60938	5.71169	3.02214e-09	1.27069e-06		BOK	1.06764	2.52558	0.00110948	0.0436802
MAP3K14	1.11404	4.30143	0.000332307	0.0190198		RBM12	0.714254	4.85809	0.000486606	0.0248578
HLF	-1.15242	3.75354	2.59257e-05	0.00253053		PKIG	0.799338	5.39042	0.000629884	0.0298247
UBALD2	-0.844589	4.71952	0.0011351	0.04416		SDC4	1.88361	6.35095	3.27011e-06	0.000483781
PPP1R27	1.98153	8.75786	1.24186e-06	0.000222557		LOC102724428	3.641	4.42786	1.03823e-06	0.000195688
AQP4	-1.20642	6.61952	2.65045e-05	0.00254931		BACH1	0.839614	5.15923	0.000810748	0.0361759
SOCS6	0.986303	5.56011	8.89641e-05	0.00671117		RCAN1	0.962687	4.90038	0.000815324	0.0362322
UBA2	0.734658	6.5242	0.000395786	0.0216652		ETS2	0.97262	5.90478	2.59028e-05	0.00253053
SERTAD3	-0.76554	3.56057	0.0013124	0.0496494		SIK1	3.55091	4.48063	2.86602e-06	0.000454078
PVR	1.241	5.7353	0.00100473	0.0415246		PCNT	1.09697	7.90461	1.40505e-05	0.00158351
DBP	-1.63973	3.98768	5.64716e-08	1.58294e-05		PRODH	1.87597	2.91644	1.70444e-05	0.00182676
KLHL29	1.48228	3.42942	5.98538e-06	0.000772697		ARVCF	1.37876	4.8123	8.47478e-07	0.000168448
CRIM1	1.34286	6.72478	8.42593e-10	5.11735e-07		MAFF	4.55641	5.19412	4.16288e-10	3.03391e-07
CDC42EP3	0.926665	5.41575	0.000797734	0.0358882		LOC102724788	1.41302	3.23128	0.000663749	0.0307462
LGALSL	-1.06158	5.76731	3.38676e-05	0.00311127		LMCD1	1.56636	8.98381	0.000598285	0.0286862
EIF2AK3	2.04949	4.00237	2.10721e-06	0.000349358		TMEM43	0.711911	5.59955	0.000840379	0.0371841
ARID5A	1.97648	5.29094	7.26691e-07	0.00014989		SH3BP5	1.22724	2.71726	0.000443179	0.0236333
IL1R1	1.47261	4.91627	8.96296e-05	0.00671117		XIRP1	4.22116	11.513	3.90912e-10	3.03391e-07
LIMS1	1.14938	6.40248	2.65845e-05	0.00254931		KLHL40	3.19595	9.92615	4.43385e-08	1.27555e-05
LIMS3	1.29196	2.13462	0.000591279	0.0284751		HHATL	0.934365	8.05119	0.00108419	0.0433985
NPHP1	-1.45987	5.04616	1.70898e-06	0.000291916		SLMAP	1.03062	7.40976	0.00013963	0.00942243
LIMS3L	1.35757	3.69715	1.18853e-05	0.00138224		KBTBD8	2.88492	3.65777	0.00013856	0.00940828
RND3	2.48034	4.98997	2.63677e-06	0.000423899		KPNA1	0.888204	7.58856	1.93244e-05	0.00205101
FMNL2	1.32668	5.31648	0.000162239	0.0106687		SEC61A1	0.770201	6.47427	0.00010986	0.00774833
ITGB6	-0.976354	7.23192	4.54888e-06	0.000637542		ATP1B3	0.931804	3.87427	0.000534146	0.0263031
XIRP2	1.48821	12.112	0.000929429	0.0396895		FNDC3B	1.44656	5.54085	7.61637e-09	2.97365e-06
ZNF385B	1.80874	3.64606	9.4102e-05	0.00695083		MCF2L2	1.86575	3.25205	3.09683e-08	9.55832e-06
MSTN	-1.42549	4.32039	0.000741629	0.033641		TP63	1.59331	5.6001	4.03744e-07	9.19526e-05
MARS2	0.95242	3.60878	0.00108774	0.0433985		KIAA0226	1.59098	4.58289	1.69466e-10	1.54384e-07
C2orf69	0.966523	4.31811	4.03874e-05	0.00358956		DOK7	1.08785	4.65372	0.000447447	0.0237451
ACSL3	1.12955	6.07584	3.14763e-08	9.55832e-06		PPARGC1A	2.89778	8.21621	8.09534e-08	2.16169e-05
DGKD	1.37735	7.08106	3.03105e-06	0.000466696		AGPAT9	1.29201	5.91551	3.02091e-05	0.00282261
BOK	1.06764	2.52558	0.00110948	0.0436802		EIF4E	2.01461	5.39384	4.6047e-05	0.00396366
RBM12	0.714254	4.85809	0.000486606	0.0248578		SGMS2	1.81217	3.70243	5.87185e-05	0.00494051
NDRG3	-0.809276	3.89765	0.00125928	0.0483032		FNIP2	2.17831	5.99576	2.10919e-06	0.000349358
PKIG	0.799338	5.39042	0.000629884	0.0298247		ASB5	3.14933	10.7473	2.74806e-11	3.33798e-08
SDC4	1.88361	6.35095	3.27011e-06	0.000483781		ANKRD37	1.3424	3.31157	0.000618086	0.0295062
LOC102724428	3.641	4.42786	1.03823e-06	0.000195688		UBE2QL1	1.25215	5.84532	0.000132628	0.0090618
BACH1	0.839614	5.15923	0.000810748	0.0361759		FAM134B	1.10562	8.18804	0.000112212	0.00786347
RCAN1	0.962687	4.90038	0.000815324	0.0362322		GDNF	1.41182	2.76855	0.000486291	0.0248578
ETS2	0.97262	5.90478	2.59028e-05	0.00253053		RICTOR	1.14907	6.36653	3.85457e-05	0.00351151
SIK1	3.55091	4.48063	2.86602e-06	0.000454078		PPAP2A	0.824996	5.38197	9.14031e-06	0.00111024
PCNT	1.09697	7.90461	1.40505e-05	0.00158351		PDE4D	1.11811	7.63339	7.09119e-05	0.005603
PRODH	1.87597	2.91644	1.70444e-05	0.00182676		MAST4	2.07903	5.24411	2.56854e-06	0.000419093
ARVCF	1.37876	4.8123	8.47478e-07	0.000168448		FNIP1	0.652085	5.41115	0.00099329	0.0412876
MAFF	4.55641	5.19412	4.16288e-10	3.03391e-07		SLC22A5	0.948163	4.36488	0.000553437	0.0271308
TEF	-1.41299	5.92656	8.53223e-06	0.00105994		PPP2CA	0.905443	6.74065	0.000208107	0.0130002
TOB2	-1.03954	6.67778	0.000181912	0.011562		EGR1	2.35122	4.21336	0.000114521	0.00797416
LOC102724788	1.41302	3.23128	0.000663749	0.0307462		HBEGF	2.68227	6.38204	2.69167e-08	8.8293e-06
LMCD1	1.56636	8.98381	0.000598285	0.0286862		DIAPH1	1.52699	7.35613	1.27942e-09	7.36137e-07
TMEM43	0.711911	5.59955	0.000840379	0.0371841		CPEB4	1.67462	7.24335	4.51093e-05	0.00391377
SH3BP5	1.22724	2.71726	0.000443179	0.0236333		TRIM38	0.947021	3.61467	0.000338709	0.0192852
PLCL2	-0.906978	5.62791	1.17159e-05	0.00137719		HSPA1A	2.2124	8.56281	3.9901e-05	0.00358956
NR1D2	-1.34612	6.6009	3.73808e-08	1.10445e-05		HSPA1B	2.13228	8.36565	6.23772e-05	0.00508887
ACVR2B	-0.906011	4.11436	0.000735305	0.0334932		CDKN1A	4.23347	5.17315	2.27676e-20	2.48896e-16
XIRP1	4.22116	11.513	3.90912e-10	3.03391e-07		PIM1	1.42923	3.96513	0.0010154	0.0415743
KLHL40	3.19595	9.92615	4.43385e-08	1.27555e-05		VEGFA	0.932818	7.622	0.000450617	0.0237978
HHATL	0.934365	8.05119	0.00108419	0.0433985		AMD1	0.944879	5.64017	0.000912624	0.0391247
DUSP7	-0.849618	4.63694	0.000711844	0.0325602		VGLL2	2.54744	7.89097	2.15433e-15	5.88777e-12
ASB14	-0.802046	5.64541	7.46682e-05	0.00583052		RNF146	0.738237	6.72254	0.000658605	0.0306377
SLMAP	1.03062	7.40976	0.00013963	0.00942243		SGK1	1.25673	6.14558	0.00026153	0.0154543
KBTBD8	2.88492	3.65777	0.00013856	0.00940828		TNFAIP3	1.12142	3.58383	6.00798e-06	0.000772697
PDZRN3	-0.772226	6.05258	0.00110699	0.0436802		SYNE1	0.785337	7.0821	0.00106229	0.0429914
KPNA1	0.888204	7.58856	1.93244e-05	0.00205101		SYNJ2	1.71288	3.5644	8.78155e-06	0.00107865
SEC61A1	0.770201	6.47427	0.00010986	0.00774833		MAFK	1.05788	5.39576	0.00015688	0.0104574
KY	-2.13145	4.01288	2.08971e-05	0.00215516		DFNA5	1.39862	2.36834	6.97226e-06	0.0008761
ATP1B3	0.931804	3.87427	0.000534146	0.0263031		WIPF3	1.4631	5.60965	5.35698e-07	0.000114829
P2RY1	-0.88047	3.52654	0.00126848	0.0484139		AUTS2	1.87486	4.54172	1.98267e-09	9.75559e-07
SKIL	-0.717008	4.81943	0.000641684	0.0301068		ELN	1.22996	3.69736	0.00131254	0.0496494
FNDC3B	1.44656	5.54085	7.61637e-09	2.97365e-06		HSPB1	1.47979	9.76516	5.12046e-05	0.00437319
MCF2L2	1.86575	3.25205	3.09683e-08	9.55832e-06		PEG10	2.1084	3.38396	0.000352243	0.0199519
TP63	1.59331	5.6001	4.03744e-07	9.19526e-05		PDK4	2.24132	10.4862	4.0248e-05	0.00358956
KIAA0226	1.59098	4.58289	1.69466e-10	1.54384e-07		SMURF1	0.807787	4.3554	0.00035558	0.0200371
DOK7	1.08785	4.65372	0.000447447	0.0237451		SRPK2	0.936157	4.41113	0.000439619	0.023608
PPARGC1A	2.89778	8.21621	8.09534e-08	2.16169e-05		PNPLA8	0.950065	5.78518	0.000949119	0.0402161
AGPAT9	1.29201	5.91551	3.02091e-05	0.00282261		IFRD1	2.23982	6.85111	5.55671e-06	0.000745983
EIF4E	2.01461	5.39384	4.6047e-05	0.00396366		STRIP2	1.02048	5.97637	6.21372e-05	0.00508887
SGMS2	1.81217	3.70243	5.87185e-05	0.00494051		TMEM140	0.905248	5.20895	0.000274585	0.0159668
GAB1	-1.53184	5.43902	3.24722e-06	0.000483781		PRKAG2	3.6796	5.8131	3.50093e-12	6.37869e-09
NR3C2	-0.921216	4.43769	2.31055e-05	0.00233879		DUSP4	1.27263	2.21113	0.000785968	0.035505
GLRB	-0.85885	2.0104	0.00121187	0.0468134		FAM110B	1.52674	4.66916	8.55669e-08	2.22718e-05
FNIP2	2.17831	5.99576	2.10919e-06	0.000349358		SDCBP	0.850033	5.88812	0.00101039	0.0415246
ASB5	3.14933	10.7473	2.74806e-11	3.33798e-08		ABRA	2.66098	9.22829	6.95902e-11	7.6076e-08
ANKRD37	1.3424	3.31157	0.000618086	0.0295062		MYC	2.73234	4.11818	1.54447e-06	0.000268002
UBE2QL1	1.25215	5.84532	0.000132628	0.0090618		CDC37L1	1.49087	6.7262	4.21257e-07	9.39832e-05
FAM134B	1.10562	8.18804	0.000112212	0.00786347		DNAJA1	0.84177	5.14615	0.00047818	0.0246578
GDNF	1.41182	2.76855	0.000486291	0.0248578		SMC5	1.10767	5.40691	5.59556e-06	0.000745983
RICTOR	1.14907	6.36653	3.85457e-05	0.00351151		NFIL3	2.4088	4.46045	7.34024e-10	4.72021e-07
PPAP2A	0.824996	5.38197	9.14031e-06	0.00111024		NR4A3	5.86483	7.39585	6.28073e-17	2.2887e-13
PDE4D	1.11811	7.63339	7.09119e-05	0.005603		RALGAPA1P	0.703787	4.42226	0.000468449	0.0245028
MAST4	2.07903	5.24411	2.56854e-06	0.000419093		TMEM38B	0.931078	7.26905	0.000187758	0.0118178
RGMB	-0.793219	5.16709	6.82896e-05	0.00547812		ANGPTL2	1.37933	6.66037	5.92029e-05	0.00494051
SLC12A2	-1.40362	5.58242	2.74603e-08	8.8293e-06		FAM102A	2.361	3.7646	1.54611e-05	0.00169056
FNIP1	0.652085	5.41115	0.00099329	0.0412876		TBL1X	0.93835	3.41628	0.000101799	0.00741908
SLC22A5	0.948163	4.36488	0.000553437	0.0271308		CNKSR2	1.28802	3.54519	1.51193e-05	0.00168657
PPP2CA	0.905443	6.74065	0.000208107	0.0130002		KLHL34	1.50397	5.70335	0.00026777	0.0156789
EGR1	2.35122	4.21336	0.000114521	0.00797416		DYNLT3	0.995794	3.59684	0.000961778	0.0405952
CXXC5	-1.0526	5.72647	2.18653e-05	0.00223393		CLCN5	1.1522	4.18389	0.000162977	0.0106687
HBEGF	2.68227	6.38204	2.69167e-08	8.8293e-06		ARMCX1	0.863419	4.83881	2.89026e-05	0.00272382
DIAPH1	1.52699	7.35613	1.27942e-09	7.36137e-07		LONRF3	2.57023	3.47661	2.14203e-09	9.75559e-07
ARHGEF37	-0.8056	5.01468	0.000531588	0.0263031
CPEB4	1.67462	7.24335	4.51093e-05	0.00391377
MYLIP	-0.683217	5.469	0.00124273	0.0478362
TRIM38	0.947021	3.61467	0.000338709	0.0192852
HSPA1A	2.2124	8.56281	3.9901e-05	0.00358956
HSPA1B	2.13228	8.36565	6.23772e-05	0.00508887
CDKN1A	4.23347	5.17315	2.27676e-20	2.48896e-16
PIM1	1.42923	3.96513	0.0010154	0.0415743
VEGFA	0.932818	7.622	0.000450617	0.0237978
AMD1	0.944879	5.64017	0.000912624	0.0391247
VGLL2	2.54744	7.89097	2.15433e-15	5.88777e-12
RNF146	0.738237	6.72254	0.000658605	0.0306377
SGK1	1.25673	6.14558	0.00026153	0.0154543
TNFAIP3	1.12142	3.58383	6.00798e-06	0.000772697
SYNE1	0.785337	7.0821	0.00106229	0.0429914
SYNJ2	1.71288	3.5644	8.78155e-06	0.00107865
MAFK	1.05788	5.39576	0.00015688	0.0104574
CDCA7L	-1.10985	1.81798	0.000846948	0.0371841
DFNA5	1.39862	2.36834	6.97226e-06	0.0008761
HOXA11	-1.1211	2.66503	0.000984745	0.041226
WIPF3	1.4631	5.60965	5.35698e-07	0.000114829
KBTBD2	-0.969934	6.40816	1.37245e-05	0.00156287
AUTS2	1.87486	4.54172	1.98267e-09	9.75559e-07
ELN	1.22996	3.69736	0.00131254	0.0496494
HSPB1	1.47979	9.76516	5.12046e-05	0.00437319
PEG10	2.1084	3.38396	0.000352243	0.0199519
PDK4	2.24132	10.4862	4.0248e-05	0.00358956
SMURF1	0.807787	4.3554	0.00035558	0.0200371
SRPK2	0.936157	4.41113	0.000439619	0.023608
PNPLA8	0.950065	5.78518	0.000949119	0.0402161
IFRD1	2.23982	6.85111	5.55671e-06	0.000745983
STRIP2	1.02048	5.97637	6.21372e-05	0.00508887
TMEM140	0.905248	5.20895	0.000274585	0.0159668
FAM131B	-1.08069	2.64486	0.000293031	0.0168601
PRKAG2	3.6796	5.8131	3.50093e-12	6.37869e-09
DUSP4	1.27263	2.21113	0.000785968	0.035505
FAM110B	1.52674	4.66916	8.55669e-08	2.22718e-05
SDCBP	0.850033	5.88812	0.00101039	0.0415246
PDP1	-1.43882	6.17566	9.50581e-08	2.41669e-05
ABRA	2.66098	9.22829	6.95902e-11	7.6076e-08
ANGPT1	-1.02942	5.06366	7.1242e-05	0.005603
TRIB1	-0.764796	5.80924	0.000367694	0.0206135
MYC	2.73234	4.11818	1.54447e-06	0.000268002
CDC37L1	1.49087	6.7262	4.21257e-07	9.39832e-05
MOB3B	-1.22522	3.08842	0.000222535	0.0137444
DNAJA1	0.84177	5.14615	0.00047818	0.0246578
SMC5	1.10767	5.40691	5.59556e-06	0.000745983
GADD45G	-2.10585	5.59472	4.28618e-06	0.000608526
NFIL3	2.4088	4.46045	7.34024e-10	4.72021e-07
NR4A3	5.86483	7.39585	6.28073e-17	2.2887e-13
RALGAPA1P	0.703787	4.42226	0.000468449	0.0245028
TMEM38B	0.931078	7.26905	0.000187758	0.0118178
ANGPTL2	1.37933	6.66037	5.92029e-05	0.00494051
FAM102A	2.361	3.7646	1.54611e-05	0.00169056
FAM78A	-1.09263	5.55639	0.000947337	0.0402161
TBL1X	0.93835	3.41628	0.000101799	0.00741908
CNKSR2	1.28802	3.54519	1.51193e-05	0.00168657
KLHL34	1.50397	5.70335	0.00026777	0.0156789
DYNLT3	0.995794	3.59684	0.000961778	0.0405952
MID1IP1	-1.09007	6.50656	0.000175002	0.0112431
CLCN5	1.1522	4.18389	0.000162977	0.0106687
ARMCX1	0.863419	4.83881	2.89026e-05	0.00272382
LONRF3	2.57023	3.47661	2.14203e-09	9.75559e-07

## Sheet: BL.Y vs ECC.Y
All differentially expressed genes						Up-regulated genes						Down-regulated genes
Gene	logFC	logCPM	PValue	FDR		Gene	logFC	logCPM	PValue	FDR		Gene	logFC	logCPM	PValue	FDR
SLC35E2B	-0.543536	5.17543	0.00268334	0.0393096		ERRFI1	3.41059	5.80359	7.9297e-11	1.50609e-08		SLC35E2B	-0.543536	5.17543	0.00268334	0.0393096
SLC35E2	-0.743824	4.68986	0.000814098	0.0164075		ENO1	0.727009	6.39404	0.000473587	0.0104463		SLC35E2	-0.743824	4.68986	0.000814098	0.0164075
PER3	-1.22446	5.65059	5.7006e-05	0.00191067		TNFRSF1B	0.648609	4.22844	0.00146853	0.0255656		PER3	-1.22446	5.65059	5.7006e-05	0.00191067
ERRFI1	3.41059	5.80359	7.9297e-11	1.50609e-08		PRDM2	1.09544	6.19501	6.12768e-05	0.00203492		H6PD	-1.19913	6.79189	2.48019e-07	1.95989e-05
ENO1	0.727009	6.39404	0.000473587	0.0104463		SPEN	1.1032	6.05837	7.68466e-05	0.00246867		C1orf127	-0.889444	3.92229	0.000776026	0.015674
H6PD	-1.19913	6.79189	2.48019e-07	1.95989e-05		HSPB7	1.66716	11.2434	4.17932e-07	3.05712e-05		TMEM57	-0.979881	5.23609	2.26114e-06	0.000129519
C1orf127	-0.889444	3.92229	0.000776026	0.015674		RCC2	0.884876	3.13104	0.000115642	0.00353655		CEP85	-0.756054	6.68236	0.000933324	0.0179152
TNFRSF1B	0.648609	4.22844	0.00146853	0.0255656		PQLC2	0.926945	2.94866	0.000831506	0.0165172		KDM4A	-0.752722	3.59846	0.00209627	0.0327479
PRDM2	1.09544	6.19501	6.12768e-05	0.00203492		SRSF10	0.961512	5.78332	2.73218e-05	0.0010415		IFI44L	-1.55183	3.54475	0.000167867	0.00474837
SPEN	1.1032	6.05837	7.68466e-05	0.00246867		TRIM63	1.02725	8.36406	0.000244576	0.00629137		LRRC8D	-0.760738	2.38775	0.00326106	0.0459093
HSPB7	1.66716	11.2434	4.17932e-07	3.05712e-05		FABP3	0.637278	8.51852	0.00334499	0.0467866		FAM46C	-1.9286	4.73049	4.16712e-08	4.06426e-06
RCC2	0.884876	3.13104	0.000115642	0.00353655		ZC3H12A	1.95469	2.93915	1.50108e-06	9.3395e-05		TXNIP	-1.12244	10.0567	0.00019113	0.00516967
PQLC2	0.926945	2.94866	0.000831506	0.0165172		HEYL	1.04873	3.58074	3.42277e-05	0.00126037		C1orf51	-2.0901	3.81739	2.94307e-07	2.27583e-05
SRSF10	0.961512	5.78332	2.73218e-05	0.0010415		KCNQ4	1.9848	3.57092	1.58577e-06	9.69919e-05		GOLPH3L	-1.10535	3.67013	3.33075e-05	0.00123913
TMEM57	-0.979881	5.23609	2.26114e-06	0.000129519		MAST2	0.832155	7.97186	0.00220171	0.0338095		SOX13	-0.92426	4.44617	1.83747e-05	0.000750657
TRIM63	1.02725	8.36406	0.000244576	0.00629137		OSBPL9	1.54591	6.81514	1.94e-06	0.000114144		RCOR3	-0.557002	6.28655	0.00238088	0.0360495
CEP85	-0.756054	6.68236	0.000933324	0.0179152		COA7	0.800764	4.35166	0.000162771	0.00464949		CNST	-0.752154	5.43364	0.0019108	0.0307587
FABP3	0.637278	8.51852	0.00334499	0.0467866		IL12RB2	1.9746	2.99828	2.5659e-05	0.000987964		PFKFB3	-1.65809	6.84169	0.000520673	0.0112511
ZC3H12A	1.95469	2.93915	1.50108e-06	9.3395e-05		GADD45A	3.92034	5.26656	1.12116e-11	2.69726e-09		PRKCQ-AS1	-0.707813	5.03803	0.00209571	0.0327479
HEYL	1.04873	3.58074	3.42277e-05	0.00126037		NEXN	1.02548	9.16415	5.14546e-05	0.00177404		PTER	-0.644544	3.74323	0.00244097	0.0365021
KCNQ4	1.9848	3.57092	1.58577e-06	9.69919e-05		FUBP1	0.836769	5.15901	6.82472e-05	0.00223111		FAM13C	-1.09235	3.60775	0.000170065	0.00477585
KDM4A	-0.752722	3.59846	0.00209627	0.0327479		DNAJB4	2.66264	8.42236	1.37637e-14	8.76504e-12		RHOBTB1	-0.947589	7.73289	0.000815371	0.0164075
MAST2	0.832155	7.97186	0.00220171	0.0338095		TTLL7	0.820733	3.21222	0.00229145	0.0349397		H2AFY2	-0.851812	2.34696	0.00121703	0.0220697
OSBPL9	1.54591	6.81514	1.94e-06	0.000114144		CYR61	3.33368	6.64749	9.98262e-09	1.1497e-06		SGPL1	-0.826037	3.75857	0.000355517	0.0083308
COA7	0.800764	4.35166	0.000162771	0.00464949		LRRC8B	2.56619	4.68382	4.82994e-10	8.04446e-08		DDIT4	-2.02313	5.45052	1.29064e-06	8.17105e-05
IL12RB2	1.9746	2.99828	2.5659e-05	0.000987964		GPSM2	3.46254	5.1688	2.92609e-14	1.50847e-11		CPEB3	-0.707164	5.43128	0.000662047	0.0137305
GADD45A	3.92034	5.26656	1.12116e-11	2.69726e-09		SORT1	1.07458	7.48433	9.29777e-06	0.000419407		LZTS2	-0.608921	4.71733	0.000402335	0.0091892
NEXN	1.02548	9.16415	5.14546e-05	0.00177404		KCNC4	3.17885	4.63826	6.08269e-12	1.64628e-09		LBX1	-1.14288	3.63526	2.00753e-06	0.000116847
FUBP1	0.836769	5.15901	6.82472e-05	0.00223111		RBM15	0.984013	3.34883	6.29128e-05	0.0020765		LBX1-AS1	-1.25796	3.52784	0.00042413	0.00958587
DNAJB4	2.66264	8.42236	1.37637e-14	8.76504e-12		ATP1A1	1.14515	5.68894	3.81911e-08	3.79318e-06		HPS6	-0.700353	3.14254	0.00285314	0.0413495
IFI44L	-1.55183	3.54475	0.000167867	0.00474837		WDR3	1.067	4.71256	0.000303023	0.00740526		LDB1	-0.784818	5.38208	2.51932e-05	0.000974866
TTLL7	0.820733	3.21222	0.00229145	0.0349397		RNF115	1.94091	6.9399	8.76706e-09	1.03593e-06		PITX3	-1.2334	3.18649	0.00022605	0.00588274
CYR61	3.33368	6.64749	9.98262e-09	1.1497e-06		NUDT4P2	2.73662	7.1248	4.4319e-09	5.71187e-07		WBP1L	-1.2906	5.30495	3.66582e-11	8.09921e-09
LRRC8B	2.56619	4.68382	4.82994e-10	8.04446e-08		BCL9	1.31361	4.54211	0.000132152	0.00393043		CDKN1C	-0.844931	4.59603	0.00145561	0.0254801
LRRC8D	-0.760738	2.38775	0.00326106	0.0459093		NUDT4P1	2.74404	7.13799	2.53193e-09	3.47163e-07		ART1	-0.914717	4.93177	0.00242722	0.036476
GPSM2	3.46254	5.1688	2.92609e-14	1.50847e-11		LOC100996761	0.7834	3.33129	0.00208623	0.0326853		CHRNA10	-0.904296	4.96016	0.00067999	0.0140757
SORT1	1.07458	7.48433	9.29777e-06	0.000419407		PLEKHO1	1.67321	5.9104	1.30495e-08	1.45644e-06		SLC43A1	-1.13401	3.72893	0.000226599	0.00588289
KCNC4	3.17885	4.63826	6.08269e-12	1.64628e-09		PI4KB	0.849821	5.94626	0.000244658	0.00629137		FADD	-0.732891	2.90724	0.00235802	0.0358035
RBM15	0.984013	3.34883	6.29128e-05	0.0020765		S100A6	1.17352	6.54748	0.00204595	0.0322878		PCF11	-0.72348	4.52179	0.00118634	0.0216217
ATP1A1	1.14515	5.68894	3.81911e-08	3.79318e-06		S100A16	0.64345	4.3309	0.00191699	0.0307587		CTSC	-0.860314	3.94726	0.00043286	0.0096821
FAM46C	-1.9286	4.73049	4.16712e-08	4.06426e-06		IL6R	2.6384	6.43122	6.16687e-11	1.30907e-08		DIXDC1	-1.19792	4.87464	1.45533e-07	1.24058e-05
WDR3	1.067	4.71256	0.000303023	0.00740526		UCK2	2.16088	4.71396	1.58684e-07	1.34212e-05		SCN2B	-1.74926	3.19906	9.09704e-08	8.21855e-06
RNF115	1.94091	6.9399	8.76706e-09	1.03593e-06		SLC19A2	0.731223	7.04639	0.000891629	0.0173611		UBE4A	-0.603588	5.6442	0.00354803	0.0488689
TXNIP	-1.12244	10.0567	0.00019113	0.00516967		FAM20B	0.778813	5.84307	0.00212194	0.0330321		ADIPOR2	-0.619909	5.93498	0.00125112	0.0225369
NUDT4P2	2.73662	7.1248	4.4319e-09	5.71187e-07		SOAT1	0.974423	2.94325	0.00335216	0.0468265		DCP1B	-0.993021	2.25321	7.67687e-05	0.00246867
BCL9	1.31361	4.54211	0.000132152	0.00393043		XPR1	0.605067	3.98363	0.00365109	0.0497817		CDKN1B	-0.689078	5.72286	0.000294457	0.00727805
NUDT4P1	2.74404	7.13799	2.53193e-09	3.47163e-07		IER5	1.32362	5.97993	0.000214643	0.00565656		APOLD1	-1.18766	4.18098	0.000368498	0.00861632
LOC100996761	0.7834	3.33129	0.00208623	0.0326853		GLUL	0.808071	9.81371	0.00356125	0.0489887		FGD4	-0.711082	4.99458	0.00207009	0.0325265
PLEKHO1	1.67321	5.9104	1.30495e-08	1.45644e-06		LAMC1	0.643131	7.21176	0.00265338	0.0390292		LRRK2	-0.631517	3.62694	0.00187243	0.0303733
C1orf51	-2.0901	3.81739	2.94307e-07	2.27583e-05		FAM129A	0.796171	7.2672	0.00286013	0.0413954		SLC38A4	-1.7117	3.77832	1.32968e-05	0.000566737
GOLPH3L	-1.10535	3.67013	3.33075e-05	0.00123913		GLRX2	0.910575	3.48437	1.78642e-05	0.00074384		AVIL	-0.791826	3.54455	0.00361984	0.0494635
PI4KB	0.849821	5.94626	0.000244658	0.00629137		IGFN1	2.65329	8.91499	0.00167375	0.0281805		CTDSP2	-0.744189	7.14653	0.000162326	0.00464949
S100A6	1.17352	6.54748	0.00204595	0.0322878		PPFIA4	1.6416	6.12281	2.57349e-05	0.000987964		LGR5	-1.80675	4.79084	1.10125e-06	7.2379e-05
S100A16	0.64345	4.3309	0.00191699	0.0307587		MYOG	1.58319	6.67588	2.70322e-06	0.000150851		APPL2	-0.689646	3.47458	0.00276276	0.0402011
IL6R	2.6384	6.43122	6.16687e-11	1.30907e-08		RASSF5	1.97117	2.99652	2.28733e-07	1.83427e-05		VSIG10	-0.902604	4.65197	1.82962e-05	0.000750282
UCK2	2.16088	4.71396	1.58684e-07	1.34212e-05		PLXNA2	0.654833	4.92714	0.00272738	0.0397397		SETD1B	-0.682879	4.0203	0.00174905	0.0290418
SLC19A2	0.731223	7.04639	0.000891629	0.0173611		LPGAT1	0.603874	5.36114	0.00271593	0.0396262		BCL7A	-0.811873	3.72677	0.000306887	0.00746596
FAM20B	0.778813	5.84307	0.00212194	0.0330321		PPP2R5A	0.887014	6.07367	0.000245891	0.00629317		IL17D	-1.18129	6.29502	0.000412693	0.00936648
SOAT1	0.974423	2.94325	0.00335216	0.0468265		ATF3	5.54135	7.54177	1.31808e-20	2.13374e-17		SLC46A3	-1.02575	3.406	0.000100675	0.00313192
XPR1	0.605067	3.98363	0.00365109	0.0497817		PTPN14	0.731001	6.20365	0.00198154	0.0314548		N4BP2L1	-1.04522	3.10158	0.0017964	0.0295559
IER5	1.32362	5.97993	0.000214643	0.00565656		TGFB2	2.84632	5.62487	1.37392e-16	1.2395e-13		UTP14C	-0.670023	3.85743	0.00290438	0.041886
GLUL	0.808071	9.81371	0.00356125	0.0489887		DUSP10	1.16281	5.06591	0.000220706	0.00579942		RAB2B	-0.966179	2.64845	0.00184943	0.030199
LAMC1	0.643131	7.21176	0.00265338	0.0390292		TP53BP2	1.74169	5.19004	3.77856e-07	2.78277e-05		SLC7A8	-1.10504	3.66605	3.71877e-05	0.00135554
FAM129A	0.796171	7.2672	0.00286013	0.0413954		ENAH	3.74313	8.51676	5.52998e-15	3.74172e-12		DHRS4-AS1	-0.785716	2.70402	0.0015718	0.026882
GLRX2	0.910575	3.48437	1.78642e-05	0.00074384		WNT9A	2.68472	3.52786	4.70259e-09	5.98944e-07		NFKBIA	-1.14816	5.21563	1.32029e-06	8.31016e-05
IGFN1	2.65329	8.91499	0.00167375	0.0281805		EDARADD	0.582322	3.78493	0.00243904	0.0365021		CTAGE5	-0.987569	5.14159	1.80125e-05	0.000747139
PPFIA4	1.6416	6.12281	2.57349e-05	0.000987964		HNRNPU	0.960806	7.55852	0.00018146	0.00501145		C14orf28	-0.931111	2.15726	0.00107072	0.0199794
MYOG	1.58319	6.67588	2.70322e-06	0.000150851		IDI1	0.774468	6.05952	0.000339232	0.00805378		TXNDC16	-1.17447	2.17526	2.97757e-06	0.000162804
SOX13	-0.92426	4.44617	1.83747e-05	0.000750657		KLF6	1.03823	6.22258	0.00157456	0.0268868		SIX1	-1.14269	6.52615	9.90049e-06	0.000441081
RASSF5	1.97117	2.99652	2.28733e-07	1.83427e-05		AKR1C1	1.12874	4.96436	0.000968672	0.0183657		EXD2	-0.658483	4.05618	0.0019178	0.0307587
PLXNA2	0.654833	4.92714	0.00272738	0.0397397		OTUD1	4.35532	8.95395	2.3674e-12	7.53807e-10		SLC12A6	-0.614446	4.86971	0.00176895	0.0292823
RCOR3	-0.557002	6.28655	0.00238088	0.0360495		ABI1	0.656279	4.84653	0.00122475	0.0220985		FAM214A	-0.813696	5.45505	0.000533537	0.0115061
LPGAT1	0.603874	5.36114	0.00271593	0.0396262		MAP3K8	3.14263	4.13022	7.95605e-08	7.36173e-06		RFX7	-0.729841	4.40204	0.00295122	0.0423738
PPP2R5A	0.887014	6.07367	0.000245891	0.00629317		CSGALNACT2	0.74093	4.74024	0.00103626	0.0194766		KBTBD13	-0.751922	4.92493	0.00172885	0.0287602
ATF3	5.54135	7.54177	1.31808e-20	2.13374e-17		RHEBP2	0.614563	4.43108	0.00117807	0.0215073		SIN3A	-0.810301	4.18148	4.68648e-05	0.00163664
PTPN14	0.731001	6.20365	0.00198154	0.0314548		PRKG1	1.47862	7.17287	0.000279751	0.00701061		RAB40C	-0.806809	3.50791	0.000188644	0.0051313
TGFB2	2.84632	5.62487	1.37392e-16	1.2395e-13		IPMK	1.06553	3.01493	0.00216615	0.0335388		UNKL	-0.696205	4.11116	0.00198574	0.0314752
DUSP10	1.16281	5.06591	0.000220706	0.00579942		ARID5B	1.41259	6.33409	0.000370982	0.0086371		ZNF174	-0.789612	2.53862	0.00191265	0.0307587
TP53BP2	1.74169	5.19004	3.77856e-07	2.78277e-05		JMJD1C	1.08819	6.08285	8.1767e-06	0.000371937		MYLK3	-1.46819	5.6413	1.14569e-06	7.42709e-05
ENAH	3.74313	8.51676	5.52998e-15	3.74172e-12		ANXA2P3	1.23253	2.40734	0.000201188	0.00539124		ANKFY1	-0.869856	4.84349	0.000466547	0.0103501
WNT9A	2.68472	3.52786	4.70259e-09	5.98944e-07		SIRT1	0.707605	4.6568	0.00290563	0.041886		ZNF594	-0.978917	2.19368	0.000322608	0.00777851
EDARADD	0.582322	3.78493	0.00243904	0.0365021		DDX21	1.00038	5.90251	1.5687e-05	0.000663389		PER1	-1.82756	6.6059	1.0831e-08	1.23428e-06
HNRNPU	0.960806	7.55852	0.00018146	0.00501145		CHST3	1.53091	4.76488	2.31897e-05	0.000916384		PLEKHH3	-0.951907	4.40732	4.03512e-06	0.000208652
CNST	-0.752154	5.43364	0.0019108	0.0307587		P4HA1	1.11638	5.97996	1.28885e-05	0.000555902		GPATCH8	-0.825866	5.83799	0.000703578	0.0144534
IDI1	0.774468	6.05952	0.000339232	0.00805378		USP54	0.900921	6.97046	0.000354983	0.0083308		HLF	-1.25526	3.64071	2.52136e-05	0.000974866
KLF6	1.03823	6.22258	0.00157456	0.0268868		PLAU	1.19013	3.74778	0.00122019	0.0220899		VEZF1	-0.524306	5.59539	0.00362318	0.0494635
AKR1C1	1.12874	4.96436	0.000968672	0.0183657		VCL	0.75698	7.77556	0.000339195	0.00805378		MTMR4	-0.835526	3.73947	0.00244112	0.0365021
PFKFB3	-1.65809	6.84169	0.000520673	0.0112511		DLG5	1.20049	5.50412	0.00033871	0.00805378		CA4	-1.15521	3.61023	0.00110846	0.0205835
PRKCQ-AS1	-0.707813	5.03803	0.00209571	0.0327479		CCSER2	0.743346	7.57311	0.00268119	0.0393096		SOX9-AS1	-0.758576	3.80308	0.00357132	0.0490648
PTER	-0.644544	3.74323	0.00244097	0.0365021		BMPR1A	0.944916	4.33116	1.82574e-05	0.000750282		C17orf80	-0.703737	4.70891	0.000965264	0.0183332
OTUD1	4.35532	8.95395	2.3674e-12	7.53807e-10		ANKRD1	7.17863	11.2748	3.99763e-22	1.08196e-18		GPRC5C	-0.616459	5.15961	0.00116164	0.0212557
ABI1	0.656279	4.84653	0.00122475	0.0220985		PCGF5	0.841544	6.5363	0.000305749	0.00745505		RECQL5	-0.738227	2.63175	0.00316089	0.0447318
MAP3K8	3.14263	4.13022	7.95605e-08	7.36173e-06		HECTD2	0.955473	3.95002	0.00258165	0.0382863		TRIM65	-0.760515	3.66259	0.000253142	0.00644827
CSGALNACT2	0.74093	4.74024	0.00103626	0.0194766		RRP12	1.84329	5.77291	4.324e-06	0.000220809		UBALD2	-0.739627	4.67623	0.0011581	0.0212502
RHEBP2	0.614563	4.43108	0.00117807	0.0215073		ANKRD2	2.15663	7.72665	2.61192e-06	0.000146511		TNRC6C	-0.689472	4.02683	0.001664	0.02806
PRKG1	1.47862	7.17287	0.000279751	0.00701061		DNMBP	1.60216	4.9944	3.47862e-07	2.63353e-05		COLEC12	-0.928778	3.54831	0.00214192	0.0332689
IPMK	1.06553	3.01493	0.00216615	0.0335388		C10orf2	1.12034	3.62097	0.000105333	0.00326743		CEP192	-0.86252	3.34317	0.00269986	0.0394449
FAM13C	-1.09235	3.60775	0.000170065	0.00477585		PPRC1	1.52612	4.54766	3.10251e-06	0.000167939		AQP4	-1.04013	6.5865	0.000939056	0.0179933
RHOBTB1	-0.947589	7.73289	0.000815371	0.0164075		NFKB2	0.739384	3.36164	0.000956435	0.0182295		TSHZ1	-0.821294	4.01238	0.000845639	0.016706
ARID5B	1.41259	6.33409	0.000370982	0.0086371		RBM20	1.93254	5.82964	5.63556e-10	9.10605e-08		ZNF554	-0.868064	2.1243	0.00165773	0.0279977
JMJD1C	1.08819	6.08285	8.1767e-06	0.000371937		NRAP	1.18475	12.4213	0.000820306	0.016444		ZNF555	-1.05517	2.35261	5.57416e-05	0.00190365
ANXA2P3	1.23253	2.40734	0.000201188	0.00539124		ABLIM1	0.986915	7.04161	0.00101378	0.0190873		KLF2	-0.798449	4.58312	0.0030684	0.043704
SIRT1	0.707605	4.6568	0.00290563	0.041886		BAG3	1.95877	9.06755	7.37702e-06	0.000347233		SLC27A1	-0.979755	4.92731	5.10613e-06	0.000251475
DDX21	1.00038	5.90251	1.5687e-05	0.000663389		CHST15	2.60143	5.2554	1.02895e-13	4.68893e-11		ARRDC2	-1.54841	6.3579	0.000915897	0.0176747
H2AFY2	-0.851812	2.34696	0.00121703	0.0220697		DUSP8	2.02574	4.15986	5.82725e-05	0.00194709		PLEKHF1	-1.81564	4.51596	4.23281e-11	9.16487e-09
SGPL1	-0.826037	3.75857	0.000355517	0.0083308		WEE1	1.23693	4.35591	0.000342261	0.00810791		RGS9BP	-0.897175	2.58854	0.00145688	0.0254801
CHST3	1.53091	4.76488	2.31897e-05	0.000916384		ADM	1.30905	3.06871	0.00135283	0.0241281		FBXO46	-1.10183	2.65226	1.04908e-05	0.000461654
DDIT4	-2.02313	5.45052	1.29064e-06	8.17105e-05		AMPD3	3.17841	5.96491	7.49429e-06	0.000348211		DBP	-1.2612	4.00495	5.48145e-06	0.000266108
P4HA1	1.11638	5.97996	1.28885e-05	0.000555902		EIF4G2	0.727664	9.5807	0.00116233	0.0212557		MAMSTR	-0.753569	5.03651	0.00186478	0.030358
USP54	0.900921	6.97046	0.000354983	0.0083308		ZBED5	0.709815	5.52658	0.000273315	0.00688119		PRR12	-0.912733	3.85697	0.000643246	0.0134177
PLAU	1.19013	3.74778	0.00122019	0.0220899		ARNTL	1.97861	3.35244	4.21931e-07	3.06565e-05		ZNF549	-0.868161	2.15163	0.00137436	0.0244718
VCL	0.75698	7.77556	0.000339195	0.00805378		RRAS2	1.57354	5.2137	3.05382e-07	2.32822e-05		GREB1	-0.880915	2.23668	0.00197068	0.0313392
DLG5	1.20049	5.50412	0.00033871	0.00805378		CSRP3	1.42471	10.0831	5.69188e-05	0.00191067		SOS1	-0.540427	5.20105	0.00347557	0.0481157
CCSER2	0.743346	7.57311	0.00268119	0.0393096		CD44	1.31249	5.02047	0.000186117	0.00508813		LGALSL	-0.911578	5.73268	5.50457e-05	0.00188584
BMPR1A	0.944916	4.33116	1.82574e-05	0.000750282		C11orf96	2.01226	3.26354	8.0786e-08	7.41177e-06		TMEM131	-0.814813	5.70989	0.000133268	0.00394197
ANKRD1	7.17863	11.2748	3.99763e-22	1.08196e-18		CHST1	1.63339	2.57063	9.47992e-05	0.00297477		ZC3H6	-1.06705	4.59839	7.46353e-06	0.000348211
PCGF5	0.841544	6.5363	0.000305749	0.00745505		TNKS1BP1	0.705682	5.49136	0.00207853	0.0326119		PAX8-AS1	-1.07104	2.12089	0.0021733	0.0335388
HECTD2	0.955473	3.95002	0.00258165	0.0382863		DTX4	0.947172	2.48191	0.00172547	0.0287602		RBM43	-1.09703	2.41308	0.00212328	0.0330321
CPEB3	-0.707164	5.43128	0.000662047	0.0137305		STX3	1.18905	4.04774	3.67758e-05	0.00134505		ZDBF2	-0.889464	4.10755	2.49366e-05	0.000971091
RRP12	1.84329	5.77291	4.324e-06	0.000220809		SLC3A2	0.778314	5.20058	0.00010631	0.00328833		PLEKHM3	-0.825386	3.21096	0.00142038	0.0250849
ANKRD2	2.15663	7.72665	2.61192e-06	0.000146511		LRFN4	1.26363	3.35166	0.00046858	0.0103739		IDH1	-0.722124	4.10958	0.000621362	0.0130873
DNMBP	1.60216	4.9944	3.47862e-07	2.63353e-05		CTTN	0.582806	5.77787	0.00339951	0.0474267		IKZF2	-0.822759	3.42542	0.00181031	0.0297396
C10orf2	1.12034	3.62097	0.000105333	0.00326743		RELT	1.72694	5.6669	4.73122e-05	0.00164695		BARD1	-1.36999	2.88306	5.62425e-05	0.00190872
LZTS2	-0.608921	4.71733	0.000402335	0.0091892		SERPINH1	0.963318	4.71323	0.00333743	0.0467413		TCF15	-1.57941	2.97786	1.60612e-05	0.000676572
LBX1	-1.14288	3.63526	2.00753e-06	0.000116847		PANX1	2.33879	6.15267	5.53042e-10	9.07157e-08		ID1	-1.04987	4.57376	0.00347019	0.0481027
LBX1-AS1	-1.25796	3.52784	0.00042413	0.00958587		SRSF8	0.577084	4.90898	0.00224159	0.0343246		NDRG3	-0.857794	3.79902	0.00279748	0.0406517
HPS6	-0.700353	3.14254	0.00285314	0.0413495		ENDOD1	1.39278	7.59988	1.92469e-08	2.04281e-06		RBL1	-0.861915	3.8103	0.00260442	0.0384659
LDB1	-0.784818	5.38208	2.51932e-05	0.000974866		SESN3	0.760181	4.19076	0.00241326	0.0364378		ZMYND8	-0.993315	3.76445	0.00032766	0.00788276
PPRC1	1.52612	4.54766	3.10251e-06	0.000167939		SIK2	1.4771	5.05615	3.20704e-05	0.00119722		CEBPB	-0.970669	6.57597	0.00126042	0.0226667
PITX3	-1.2334	3.18649	0.00022605	0.00588274		PPP2R1B	0.635509	3.82875	0.00329108	0.0462117		FAM217B	-0.809135	4.84413	0.000996584	0.018829
NFKB2	0.739384	3.36164	0.000956435	0.0182295		CRYAB	1.59392	11.1309	1.82319e-07	1.50671e-05		CECR2	-0.889644	5.43459	0.00048725	0.0106354
WBP1L	-1.2906	5.30495	3.66582e-11	8.09921e-09		NCAM1	1.57938	4.22335	0.00197137	0.0313392		PIK3IP1	-1.21886	4.31922	3.1001e-05	0.00116533
RBM20	1.93254	5.82964	5.63556e-10	9.10605e-08		USP28	1.86745	7.483	6.45666e-10	9.98569e-08		TAB1	-0.641562	4.30229	0.00328805	0.0462117
NRAP	1.18475	12.4213	0.000820306	0.016444		NNMT	1.69076	2.91227	1.66882e-06	0.00010037		TNRC6B	-0.646723	4.54095	0.00307212	0.043704
ABLIM1	0.986915	7.04161	0.00101378	0.0190873		SIK3	0.795229	5.14512	0.00189027	0.030589		TEF	-0.933964	5.99017	9.94751e-05	0.00310351
BAG3	1.95877	9.06755	7.37702e-06	0.000347233		USP2	0.930985	7.08549	0.000727244	0.0148171		TOB2	-1.62766	6.42741	1.16319e-09	1.70172e-07
CHST15	2.60143	5.2554	1.02895e-13	4.68893e-11		SCN3B	1.01644	4.02911	0.00170798	0.0285868		SLC6A1	-1.56502	2.73318	1.64243e-05	0.000689185
DUSP8	2.02574	4.15986	5.82725e-05	0.00194709		TNFRSF1A	0.685766	5.65735	0.00141341	0.0250027		NUP210	-0.914073	3.09212	0.000317425	0.00767063
CDKN1C	-0.844931	4.59603	0.00145561	0.0254801		NOP2	0.641153	4.19916	0.00237837	0.0360495		PLCL2	-1.06714	5.49156	2.55019e-06	0.000144472
ART1	-0.914717	4.93177	0.00242722	0.036476		DSTNP2	0.952302	1.93662	0.0035851	0.0490718		NR1D2	-1.03206	6.61287	2.87137e-05	0.00108691
CHRNA10	-0.904296	4.96016	0.00067999	0.0140757		RIMKLB	1.03135	4.56155	0.000770032	0.0156112		ACVR2B	-1.38868	3.88376	2.88444e-08	2.89138e-06
WEE1	1.23693	4.35591	0.000342261	0.00810791		GABARAPL1	1.37807	7.21591	4.71185e-08	4.52358e-06		CX3CR1	-0.850375	2.26302	0.00340831	0.0474272
ADM	1.30905	3.06871	0.00135283	0.0241281		DUSP16	0.915611	4.87344	0.000190128	0.00515872		ZNF619	-0.861415	1.83303	0.00221902	0.034027
AMPD3	3.17841	5.96491	7.49429e-06	0.000348211		RASSF8	1.70176	6.18526	4.76342e-08	4.52358e-06		SLC38A3	-1.34046	4.94183	4.11142e-06	0.000210949
EIF4G2	0.727664	9.5807	0.00116233	0.0212557		KIF21A	0.683692	4.87744	0.00159576	0.0270779		DUSP7	-0.868953	4.5469	5.69632e-05	0.00191067
ZBED5	0.709815	5.52658	0.000273315	0.00688119		SLC38A1	1.84408	6.2033	4.47729e-07	3.23141e-05		ZNF148	-0.705391	4.63944	0.00189625	0.0306399
ARNTL	1.97861	3.35244	4.21931e-07	3.06565e-05		TUBA1B	0.800803	6.02477	0.000566708	0.0120534		GATA2	-0.895595	3.03538	0.00340702	0.0474272
RRAS2	1.57354	5.2137	3.05382e-07	2.32822e-05		TUBA1C	1.29507	5.44131	1.85689e-07	1.52293e-05		P2RY1	-0.94385	3.42402	0.000158646	0.00458001
CSRP3	1.42471	10.0831	5.69188e-05	0.00191067		ATF1	0.691726	5.11492	0.000391057	0.00900762		ABCC5	-0.936753	6.06327	0.00090479	0.0175081
CD44	1.31249	5.02047	0.000186117	0.00508813		NR4A1	1.77045	7.27807	0.00022564	0.00588274		MASP1	-0.729656	4.16832	0.000941233	0.0180032
C11orf96	2.01226	3.26354	8.0786e-08	7.41177e-06		ITGA5	1.0361	4.95852	0.000657738	0.0136673		HES1	-0.981814	3.45758	0.00114012	0.0209944
CHST1	1.63339	2.57063	9.47992e-05	0.00297477		CD63	0.716854	7.74306	0.000719678	0.0147013		TECRL	-0.81856	5.85853	0.0011392	0.0209944
TNKS1BP1	0.705682	5.49136	0.00207853	0.0326119		NAB2	1.4799	3.21147	5.47781e-07	3.9015e-05		PPM1K	-0.872775	4.44544	0.00321518	0.0453815
SLC43A1	-1.13401	3.72893	0.000226599	0.00588289		DDIT3	0.785369	4.15568	0.000550108	0.011793		GAB1	-1.91539	5.2662	1.62613e-10	2.9307e-08
DTX4	0.947172	2.48191	0.00172547	0.0287602		CDK4	0.656849	4.77269	0.0021694	0.0335388		NR3C2	-0.770204	4.40781	0.000295775	0.007294
STX3	1.18905	4.04774	3.67758e-05	0.00134505		METTL1	1.26153	2.19964	0.000630644	0.0131893		GLRB	-0.816822	1.94929	0.00330584	0.0463588
SLC3A2	0.778314	5.20058	0.00010631	0.00328833		RAB21	0.862677	6.13926	0.00204193	0.0322714		IRF2	-0.678783	4.14094	0.00184784	0.030199
LRFN4	1.26363	3.35166	0.00046858	0.0103739		OSBPL8	2.38784	5.87996	6.35249e-11	1.32254e-08		LRRC14B	-0.774584	5.50253	0.00154611	0.0266446
FADD	-0.732891	2.90724	0.00235802	0.0358035		ATP2B1	0.717186	5.24094	0.000312585	0.00758755		SLC1A3	-0.988754	3.90695	0.000958605	0.0182388
CTTN	0.582806	5.77787	0.00339951	0.0474267		EEA1	0.744315	5.96235	0.000425559	0.00959812		SEPP1	-0.916666	5.74589	0.00097821	0.0185142
RELT	1.72694	5.6669	4.73122e-05	0.00164695		NUDT4	2.85076	7.66924	4.29324e-10	7.26228e-08		NNT-AS1	-0.675317	4.78695	0.002676	0.0393086
SERPINH1	0.963318	4.71323	0.00333743	0.0467413		UHRF1BP1L	1.01632	5.18645	2.9726e-06	0.000162804		RGMB	-0.687768	5.12326	0.000115597	0.00353655
PCF11	-0.72348	4.52179	0.00118634	0.0216217		NT5DC3	1.96367	4.31092	7.53637e-11	1.45694e-08		NUDT12	-0.858197	4.47192	0.000262567	0.00664149
CTSC	-0.860314	3.94726	0.00043286	0.0096821		CRY1	1.68402	4.52064	3.4685e-12	1.01487e-09		SLC12A2	-1.11806	5.58264	1.10376e-05	0.000479891
PANX1	2.33879	6.15267	5.53042e-10	9.07157e-08		CORO1C	0.947775	5.16419	0.000331676	0.00794409		REEP2	-0.983772	4.04007	0.000719719	0.0147013
SRSF8	0.577084	4.90898	0.00224159	0.0343246		SSH1	0.824389	5.63526	0.000400003	0.00915526		CXXC5	-1.05724	5.64288	6.23581e-07	4.35541e-05
ENDOD1	1.39278	7.59988	1.92469e-08	2.04281e-06		PPTC7	0.773728	7.12504	0.000427521	0.00960236		FAXDC2	-1.30456	3.79967	3.03823e-07	2.32822e-05
SESN3	0.760181	4.19076	0.00241326	0.0364378		SH2B3	1.92704	5.17313	1.47795e-10	2.75867e-08		NEDD9	-1.06057	4.72539	0.000852	0.0167975
SIK2	1.4771	5.05615	3.20704e-05	0.00119722		TRAFD1	1.74417	4.40579	1.96691e-08	2.06735e-06		ZNF204P	-0.97766	2.67085	0.000129612	0.00386549
PPP2R1B	0.635509	3.82875	0.00329108	0.0462117		TBX3	1.3423	4.02284	0.000214747	0.00565656		ABHD16A	-0.947646	4.76657	1.06167e-05	0.000463452
CRYAB	1.59392	11.1309	1.82319e-07	1.50671e-05		HSPB8	2.40908	10.6771	6.89832e-12	1.82149e-09		EHMT2	-0.796658	3.0395	0.000683444	0.0141202
DIXDC1	-1.19792	4.87464	1.45533e-07	1.24058e-05		TMEM233	1.01546	5.94518	0.000773694	0.0156561		POLH	-0.650657	2.78659	0.00253399	0.0376826
NCAM1	1.57938	4.22335	0.00197137	0.0313392		RNF34	1.3068	6.04733	1.82256e-11	4.11063e-09		ENPP5	-1.3207	3.83023	2.31932e-05	0.000916384
USP28	1.86745	7.483	6.45666e-10	9.98569e-08		CLIP1	1.12856	8.78438	0.000473921	0.0104463		PHF3	-0.591365	5.22849	0.00351293	0.0484471
NNMT	1.69076	2.91227	1.66882e-06	0.00010037		UBC	0.895265	11.3332	0.00139157	0.0246969		MDN1	-0.58307	5.4886	0.0011129	0.0206306
SIK3	0.795229	5.14512	0.00189027	0.030589		SLC15A4	1.05683	5.34343	6.73018e-06	0.00031817		CASP8AP2	-0.807139	3.71868	0.000824158	0.016444
SCN2B	-1.74926	3.19906	9.09704e-08	8.21855e-06		LATS2	0.845368	4.73701	0.000154417	0.00446983		SESN1	-0.685996	7.55874	0.00153538	0.0265103
UBE4A	-0.603588	5.6442	0.00354803	0.0488689		USP12	0.819365	4.68501	3.87987e-05	0.00139546		C1GALT1	-0.619971	4.16089	0.000830031	0.0165172
USP2	0.930985	7.08549	0.000727244	0.0148171		SLC7A1	2.26541	3.07521	2.08914e-06	0.000120947		CDCA7L	-0.933082	1.79876	0.0030397	0.0434139
SCN3B	1.01644	4.02911	0.00170798	0.0285868		HSPH1	1.1367	5.6131	0.00023417	0.0060649		HOXA11	-1.49481	2.48341	2.72991e-08	2.76206e-06
ADIPOR2	-0.619909	5.93498	0.00125112	0.0225369		CSNK1A1L	1.08612	2.14934	0.00011205	0.00345598		KBTBD2	-0.77961	6.39061	0.000694564	0.0142953
DCP1B	-0.993021	2.25321	7.67687e-05	0.00246867		KLF5	3.17589	4.79957	7.20455e-11	1.41812e-08		ZNF273	-1.63265	2.66063	8.61613e-05	0.00271158
TNFRSF1A	0.685766	5.65735	0.00141341	0.0250027		IRS2	2.15183	5.74457	5.08521e-05	0.00175887		SLC25A40	-0.686918	3.56429	0.000631081	0.0131893
NOP2	0.641153	4.19916	0.00237837	0.0360495		LINC00346	1.77859	6.52355	1.17684e-06	7.58363e-05		AP1S1	-0.808631	2.19085	0.00261646	0.038591
DSTNP2	0.952302	1.93662	0.0035851	0.0490718		LOC101928841	4.80446	9.93437	1.28943e-09	1.86125e-07		SMO	-0.969729	2.29696	0.000369548	0.00862225
RIMKLB	1.03135	4.56155	0.000770032	0.0156112		TEP1	0.998006	4.68044	0.000920425	0.0177305		FAM131B	-1.03467	2.57968	0.000316276	0.00765996
GABARAPL1	1.37807	7.21591	4.71185e-08	4.52358e-06		OSGEP	0.70555	4.3606	0.000899426	0.0174502		BAG4	-0.81721	2.87011	0.00358543	0.0490718
DUSP16	0.915611	4.87344	0.000190128	0.00515872		EGLN3	2.22499	4.01026	3.69124e-06	0.000193987		ZFHX4	-0.985259	3.63087	8.54578e-06	0.000387099
CDKN1B	-0.689078	5.72286	0.000294457	0.00727805		SPTSSA	1.16257	4.99612	2.51496e-09	3.47163e-07		ANGPT1	-0.879646	5.03182	0.000256738	0.00650924
APOLD1	-1.18766	4.18098	0.000368498	0.00861632		RALGAPA1	0.727321	4.71794	0.000823822	0.016444		MOB3B	-1.2879	2.99067	5.04611e-07	3.61783e-05
RASSF8	1.70176	6.18526	4.76342e-08	4.52358e-06		FRMD6	0.850578	5.07157	0.00148504	0.0258059		RMI1	-0.913055	2.14962	0.00187096	0.0303733
FGD4	-0.711082	4.99458	0.00207009	0.0325265		ERO1L	1.59246	3.80933	8.80337e-09	1.03593e-06		GADD45G	-2.437	5.45677	7.1731e-07	4.91493e-05
KIF21A	0.683692	4.87744	0.00159576	0.0270779		SAMD4A	1.17306	7.99631	5.61788e-05	0.00190872		ABCA1	-0.956526	4.81582	0.000294131	0.00727805
LRRK2	-0.631517	3.62694	0.00187243	0.0303733		FBXO34	0.80825	5.87233	0.000172078	0.00481374		RGS3	-1.02868	5.48108	0.000429827	0.00963417
SLC38A1	1.84408	6.2033	4.47729e-07	3.23141e-05		ATG14	0.942937	5.6759	0.000540823	0.0116278		ZNF618	-0.810237	2.46882	0.00227148	0.0347332
SLC38A4	-1.7117	3.77832	1.32968e-05	0.000566737		HIF1A	0.842126	3.91691	0.00182219	0.0298442		TRIM32	-0.749989	4.09193	0.00212363	0.0330321
TUBA1B	0.800803	6.02477	0.000566708	0.0120534		RAB15	3.87132	4.85545	1.74599e-14	9.94845e-12		TSC1	-0.625934	5.51196	0.00178275	0.0294207
TUBA1C	1.29507	5.44131	1.85689e-07	1.52293e-05		ACTN1	0.818114	4.04992	0.00241049	0.0364378		MID1IP1	-0.717857	6.55224	0.00269301	0.039398
ATF1	0.691726	5.11492	0.000391057	0.00900762		KIAA0247	1.02212	4.94076	0.000222344	0.00581424		ZXDA	-0.720304	2.96831	0.00263232	0.0387721
NR4A1	1.77045	7.27807	0.00022564	0.00588274		FOS	3.34399	4.94108	6.96759e-08	6.50268e-06		AMER1	-1.01777	3.26106	5.11034e-06	0.000251475
ITGA5	1.0361	4.95852	0.000657738	0.0136673		TMEM251	0.936112	3.83329	0.000692881	0.0142879		ZMYM3	-0.966508	3.5084	7.62545e-05	0.00246427
CD63	0.716854	7.74306	0.000719678	0.0147013		UBR7	0.928472	5.11319	0.000112413	0.00345735		TSC22D3	-0.836209	6.99012	0.000381533	0.0088258
NAB2	1.4799	3.21147	5.47781e-07	3.9015e-05		C14orf132	1.50852	2.75874	0.000116233	0.00354461		ATP1B4	-0.680349	5.79792	0.00162087	0.027418
DDIT3	0.785369	4.15568	0.000550108	0.011793		HSP90AA1	1.03428	9.05777	0.000390459	0.00900762		TMEM187	-0.845078	1.88119	0.00241735	0.0364488
CDK4	0.656849	4.77269	0.0021694	0.0335388		EIF5	0.677916	8.39143	0.00292821	0.0421553
METTL1	1.26153	2.19964	0.000630644	0.0131893		CEP170B	1.07998	3.02512	0.000162738	0.00464949
AVIL	-0.791826	3.54455	0.00361984	0.0494635		ACTC1	5.20759	8.13111	1.03948e-13	4.68893e-11
CTDSP2	-0.744189	7.14653	0.000162326	0.00464949		GANC	0.693918	4.77724	0.000211466	0.00559738
LGR5	-1.80675	4.79084	1.10125e-06	7.2379e-05		MAP1A	1.97256	3.81349	0.000126114	0.00381372
RAB21	0.862677	6.13926	0.00204193	0.0322714		BLOC1S6	0.808204	5.59901	0.0003539	0.00832896
OSBPL8	2.38784	5.87996	6.35249e-11	1.32254e-08		GABPB1	0.726678	2.94142	0.00288835	0.041748
ATP2B1	0.717186	5.24094	0.000312585	0.00758755		MAPK6	0.777918	6.40527	0.00349231	0.0482857
EEA1	0.744315	5.96235	0.000425559	0.00959812		MYO5A	0.769133	4.62197	0.000427516	0.00960236
NUDT4	2.85076	7.66924	4.29324e-10	7.26228e-08		ARPP19	0.87514	7.92964	0.000334405	0.00799176
UHRF1BP1L	1.01632	5.18645	2.9726e-06	0.000162804		NEDD4	1.41547	7.95504	1.77936e-07	1.4818e-05
NT5DC3	1.96367	4.31092	7.53637e-11	1.45694e-08		ANXA2	1.29816	5.89283	6.01767e-06	0.000288262
APPL2	-0.689646	3.47458	0.00276276	0.0402011		MAP2K1	0.841187	5.80881	0.000197073	0.00529406
CRY1	1.68402	4.52064	3.4685e-12	1.01487e-09		SMAD3	1.01377	6.75828	7.42138e-05	0.0024055
CORO1C	0.947775	5.16419	0.000331676	0.00794409		AAGAB	0.781949	5.09253	0.00082478	0.016444
SSH1	0.824389	5.63526	0.000400003	0.00915526		CD276	0.871646	3.36247	0.000492613	0.0107304
PPTC7	0.773728	7.12504	0.000427521	0.00960236		CSPG4	1.80697	4.84888	6.76472e-07	4.66464e-05
SH2B3	1.92704	5.17313	1.47795e-10	2.75867e-08		DNAJA4	2.1197	8.42909	4.42239e-06	0.000224393
TRAFD1	1.74417	4.40579	1.96691e-08	2.06735e-06		HOMER2	0.905524	6.93119	0.000613217	0.0129409
TBX3	1.3423	4.02284	0.000214747	0.00565656		ALPK3	1.42108	9.8421	0.000122876	0.00373667
VSIG10	-0.902604	4.65197	1.82962e-05	0.000750282		AEN	3.04944	4.31987	6.78188e-11	1.3853e-08
HSPB8	2.40908	10.6771	6.89832e-12	1.82149e-09		ABHD2	2.81648	7.30962	3.95425e-16	3.29298e-13
TMEM233	1.01546	5.94518	0.000773694	0.0156561		ZNF774	3.15975	3.63034	2.99386e-12	9.00319e-10
RNF34	1.3068	6.04733	1.82256e-11	4.11063e-09		GABARAPL3	1.27081	2.56281	0.000176969	0.00491248
SETD1B	-0.682879	4.0203	0.00174905	0.0290418		CHD2	0.918263	6.92039	0.000895214	0.0173996
BCL7A	-0.811873	3.72677	0.000306887	0.00746596		ARRDC4	1.98727	4.99322	9.55901e-09	1.11275e-06
CLIP1	1.12856	8.78438	0.000473921	0.0104463		ALDH1A3	1.07723	3.07557	3.78762e-05	0.001376
UBC	0.895265	11.3332	0.00139157	0.0246969		TNFRSF12A	5.71466	7.03265	3.29042e-27	1.1874e-23
SLC15A4	1.05683	5.34343	6.73018e-06	0.00031817		THOC6	1.53174	3.53023	4.34234e-09	5.66387e-07
IL17D	-1.18129	6.29502	0.000412693	0.00936648		GLIS2	1.06935	2.57677	0.00146886	0.0255656
LATS2	0.845368	4.73701	0.000154417	0.00446983		SNN	1.83235	6.70009	5.53241e-09	6.88435e-07
USP12	0.819365	4.68501	3.87987e-05	0.00139546		TXNDC11	0.659667	4.73678	0.00093097	0.0179017
SLC46A3	-1.02575	3.406	0.000100675	0.00313192		SMG1	0.771129	7.51719	0.000854278	0.0167975
SLC7A1	2.26541	3.07521	2.08914e-06	0.000120947		LOC100271836	1.05678	3.73451	0.000588794	0.0124986
HSPH1	1.1367	5.6131	0.00023417	0.0060649		SMG1P1	0.875733	4.19637	0.000265104	0.00669001
N4BP2L1	-1.04522	3.10158	0.0017964	0.0295559		ARHGAP17	1.12511	5.13119	2.46581e-05	0.000963713
CSNK1A1L	1.08612	2.14934	0.00011205	0.00345598		CYLD	1.5082	6.27515	2.24408e-07	1.81301e-05
UTP14C	-0.670023	3.85743	0.00290438	0.041886		RRAD	2.52083	8.96315	3.62385e-06	0.000191375
KLF5	3.17589	4.79957	7.20455e-11	1.41812e-08		CBFB	0.775648	4.40582	0.000184125	0.00504642
IRS2	2.15183	5.74457	5.08521e-05	0.00175887		GFOD2	0.874555	3.50922	0.000284911	0.00707442
LINC00346	1.77859	6.52355	1.17684e-06	7.58363e-05		PLA2G15	1.09168	5.10697	5.46634e-06	0.000266108
LOC101928841	4.80446	9.93437	1.28943e-09	1.86125e-07		NOB1	0.722412	3.69603	0.00119713	0.0217817
TEP1	0.998006	4.68044	0.000920425	0.0177305		BCAR1	0.869418	5.92562	0.00311259	0.0441637
OSGEP	0.70555	4.3606	0.000899426	0.0174502		CENPN	1.67035	2.58263	2.27008e-05	0.00090686
RAB2B	-0.966179	2.64845	0.00184943	0.030199		KIAA0513	1.42999	4.32482	1.30121e-07	1.12695e-05
SLC7A8	-1.10504	3.66605	3.71877e-05	0.00135554		DHX33	0.722489	3.9249	0.00187413	0.0303733
DHRS4-AS1	-0.785716	2.70402	0.0015718	0.026882		CD68	2.05505	3.39448	6.27493e-09	7.71959e-07
EGLN3	2.22499	4.01026	3.69124e-06	0.000193987		TP53	0.811595	2.91037	0.000857536	0.0168183
SPTSSA	1.16257	4.99612	2.51496e-09	3.47163e-07		PMP22	1.45936	6.2874	1.01467e-05	0.000450199
NFKBIA	-1.14816	5.21563	1.32029e-06	8.31016e-05		MIEF2	1.14347	6.11773	4.5899e-05	0.0016081
RALGAPA1	0.727321	4.71794	0.000823822	0.016444		MAP2K3	1.86128	7.57791	1.76953e-07	1.4818e-05
CTAGE5	-0.987569	5.14159	1.80125e-05	0.000747139		ZNF207	0.621645	5.96991	0.000728126	0.0148171
C14orf28	-0.931111	2.15726	0.00107072	0.0199794		DUSP14	2.45603	4.18431	4.63061e-13	1.79039e-10
FRMD6	0.850578	5.07157	0.00148504	0.0258059		SOCS7	1.58116	5.60646	1.10131e-08	1.24196e-06
TXNDC16	-1.17447	2.17526	2.97757e-06	0.000162804		RARA	1.6581	4.89787	1.39055e-05	0.000590358
ERO1L	1.59246	3.80933	8.80337e-09	1.03593e-06		MAP3K14	2.02458	4.89162	1.40583e-09	2.00257e-07
SAMD4A	1.17306	7.99631	5.61788e-05	0.00190872		PLEKHM1	0.991014	3.96404	0.000474744	0.0104463
FBXO34	0.80825	5.87233	0.000172078	0.00481374		COL1A1	1.15665	5.69091	0.000562525	0.011988
ATG14	0.942937	5.6759	0.000540823	0.0116278		LRRC59	0.642701	4.03764	0.00156473	0.026882
SIX1	-1.14269	6.52615	9.90049e-06	0.000441081		SPAG9	0.709231	7.21729	0.00179134	0.0295175
HIF1A	0.842126	3.91691	0.00182219	0.0298442		PPM1D	0.781941	3.24245	0.000505401	0.0109649
RAB15	3.87132	4.85545	1.74599e-14	9.94845e-12		GNA13	0.857523	6.0504	5.38856e-05	0.00185195
ACTN1	0.818114	4.04992	0.00241049	0.0364378		PSMD12	0.589013	5.14793	0.00144887	0.0254221
EXD2	-0.658483	4.05618	0.0019178	0.0307587		KPNA2	1.15819	2.78314	4.04738e-06	0.000208652
KIAA0247	1.02212	4.94076	0.000222344	0.00581424		SOX9	1.92213	2.74253	0.000127508	0.00384512
FOS	3.34399	4.94108	6.96759e-08	6.50268e-06		PPP1R27	2.53405	9.13062	6.74255e-13	2.43316e-10
TMEM251	0.936112	3.83329	0.000692881	0.0142879		PYCR1	1.04697	2.21646	0.00244842	0.0365608
UBR7	0.928472	5.11319	0.000112413	0.00345735		METRNL	0.862759	2.09056	0.00358332	0.0490718
C14orf132	1.50852	2.75874	0.000116233	0.00354461		TUBB6	0.922531	3.96764	0.000843121	0.0166867
HSP90AA1	1.03428	9.05777	0.000390459	0.00900762		NPC1	1.09695	3.73846	8.43177e-05	0.00266129
EIF5	0.677916	8.39143	0.00292821	0.0421553		GAREM	1.39716	3.71568	0.000145617	0.00423778
CEP170B	1.07998	3.02512	0.000162738	0.00464949		C18orf25	0.708392	5.55458	0.000551418	0.0117977
SLC12A6	-0.614446	4.86971	0.00176895	0.0292823		ZCCHC2	1.12644	5.05475	2.68134e-05	0.00102573
ACTC1	5.20759	8.13111	1.03948e-13	4.68893e-11		SOCS6	1.65052	5.94698	5.8976e-10	9.38933e-08
GANC	0.693918	4.77724	0.000211466	0.00559738		FSTL3	1.12009	2.55373	0.000861418	0.0168638
MAP1A	1.97256	3.81349	0.000126114	0.00381372		MIDN	1.92188	6.95982	6.2505e-05	0.00206935
BLOC1S6	0.808204	5.59901	0.0003539	0.00832896		DOT1L	1.74406	5.29933	1.18704e-07	1.04479e-05
GABPB1	0.726678	2.94142	0.00288835	0.041748		GADD45B	2.22141	3.58348	1.32842e-05	0.000566737
MAPK6	0.777918	6.40527	0.00349231	0.0482857		MFSD12	1.15665	2.93011	0.000129544	0.00386549
MYO5A	0.769133	4.62197	0.000427516	0.00960236		NMRK2	1.08582	7.23953	0.00122407	0.0220985
ARPP19	0.87514	7.92964	0.000334405	0.00799176		DAPK3	1.20485	5.66108	7.97553e-06	0.000364317
FAM214A	-0.813696	5.45505	0.000533537	0.0115061		SH3GL1	0.792823	3.7272	0.00260191	0.0384659
NEDD4	1.41547	7.95504	1.77936e-07	1.4818e-05		JUNB	1.31306	4.03696	8.35746e-05	0.00265331
RFX7	-0.729841	4.40204	0.00295122	0.0423738		LOC284454	1.29542	3.93795	0.000345627	0.00816977
ANXA2	1.29816	5.89283	6.01767e-06	0.000288262		CD97	1.19263	5.05195	3.17594e-05	0.00118971
KBTBD13	-0.751922	4.92493	0.00172885	0.0287602		DNAJB1	1.27896	5.87661	0.00190707	0.0307587
MAP2K1	0.841187	5.80881	0.000197073	0.00529406		TPM4	0.906586	5.68127	0.00143777	0.0253095
SMAD3	1.01377	6.75828	7.42138e-05	0.0024055		PLVAP	1.02125	3.84312	0.000869394	0.0169893
AAGAB	0.781949	5.09253	0.00082478	0.016444		JUND	1.48961	6.66229	1.51331e-06	9.36177e-05
CD276	0.871646	3.36247	0.000492613	0.0107304		GATAD2A	0.905443	4.5708	0.000409598	0.0093354
SIN3A	-0.810301	4.18148	4.68648e-05	0.00163664		ZNF507	0.749874	4.7145	0.000240365	0.00621048
CSPG4	1.80697	4.84888	6.76472e-07	4.66464e-05		UBA2	0.687892	6.4103	0.00105874	0.0198304
DNAJA4	2.1197	8.42909	4.42239e-06	0.000224393		ZNF529	0.738135	3.59131	0.0015026	0.0260275
HOMER2	0.905524	6.93119	0.000613217	0.0129409		SERTAD1	1.52283	4.06445	4.7513e-06	0.000238137
ALPK3	1.42108	9.8421	0.000122876	0.00373667		PVR	1.8239	6.07764	2.14864e-06	0.00012373
AEN	3.04944	4.31987	6.78188e-11	1.3853e-08		PLEKHA4	1.08976	3.73239	4.02813e-05	0.00143449
ABHD2	2.81648	7.30962	3.95425e-16	3.29298e-13		PPP1R15A	1.52168	6.08255	3.55982e-06	0.000188915
ZNF774	3.15975	3.63034	2.99386e-12	9.00319e-10		ADAM17	0.674838	3.59361	0.00293511	0.0421986
GABARAPL3	1.27081	2.56281	0.000176969	0.00491248		YWHAQ	0.671178	5.41925	0.000707795	0.0145125
CHD2	0.918263	6.92039	0.000895214	0.0173996		ODC1	0.886463	6.8208	0.000167987	0.00474837
ARRDC4	1.98727	4.99322	9.55901e-09	1.11275e-06		FAM49A	1.06095	4.6357	7.7422e-06	0.000355157
ALDH1A3	1.07723	3.07557	3.78762e-05	0.001376		KLHL29	1.65868	3.47072	7.41444e-06	0.000347484
RAB40C	-0.806809	3.50791	0.000188644	0.0051313		EPT1	0.824455	4.25916	0.000418374	0.00947557
UNKL	-0.696205	4.11116	0.00198574	0.0314752		TRIM54	1.03212	8.80871	6.74862e-05	0.00222068
TNFRSF12A	5.71466	7.03265	3.29042e-27	1.1874e-23		WDR43	1.21562	5.02132	2.9547e-06	0.000162804
THOC6	1.53174	3.53023	4.34234e-09	5.66387e-07		CRIM1	0.977337	6.38658	0.000170283	0.00477585
ZNF174	-0.789612	2.53862	0.00191265	0.0307587		STRN	1.16143	5.49324	1.05546e-07	9.44336e-06
GLIS2	1.06935	2.57677	0.00146886	0.0255656		CDC42EP3	0.901002	5.31426	0.000145182	0.00423778
SNN	1.83235	6.70009	5.53241e-09	6.88435e-07		PNO1	0.836052	3.91258	3.84433e-05	0.00139193
TXNDC11	0.659667	4.73678	0.00093097	0.0179017		AAK1	0.59803	4.26446	0.00195514	0.0311728
SMG1	0.771129	7.51719	0.000854278	0.0167975		MXD1	1.52581	4.24944	2.1625e-05	0.000873554
LOC100271836	1.05678	3.73451	0.000588794	0.0124986		MAT2A	0.972181	7.56491	0.000508891	0.0110185
SMG1P1	0.875733	4.19637	0.000265104	0.00669001		RGPD1	0.929171	2.90182	0.000150831	0.00437774
ARHGAP17	1.12511	5.13119	2.46581e-05	0.000963713		RGPD2	1.08257	2.85079	3.54399e-05	0.00130058
MYLK3	-1.46819	5.6413	1.14569e-06	7.42709e-05		EIF2AK3	2.20324	4.03596	9.16362e-10	1.39726e-07
CYLD	1.5082	6.27515	2.24408e-07	1.81301e-05		ARID5A	2.82393	5.91306	2.60775e-15	2.01654e-12
RRAD	2.52083	8.96315	3.62385e-06	0.000191375		RNF149	1.68812	4.31362	1.10313e-06	7.2379e-05
CBFB	0.775648	4.40582	0.000184125	0.00504642		IL1R1	2.12681	5.32995	3.87744e-08	3.8161e-06
GFOD2	0.874555	3.50922	0.000284911	0.00707442		RGPD3	1.00064	3.36583	3.73779e-06	0.000195484
PLA2G15	1.09168	5.10697	5.46634e-06	0.000266108		RGPD4	0.822326	3.43326	0.000282816	0.00707105
NOB1	0.722412	3.69603	0.00119713	0.0217817		LIMS1	1.71308	6.72842	9.10979e-08	8.21855e-06
BCAR1	0.869418	5.92562	0.00311259	0.0441637		RANBP2	0.866025	6.81648	8.42564e-05	0.00266129
CENPN	1.67035	2.58263	2.27008e-05	0.00090686		RGPD5	0.983636	4.33397	5.1983e-06	0.000254646
KIAA0513	1.42999	4.32482	1.30121e-07	1.12695e-05		LIMS3	1.95033	2.51711	1.00129e-06	6.69135e-05
ANKFY1	-0.869856	4.84349	0.000466547	0.0103501		LIMS3L	2.00894	4.09837	1.53133e-08	1.67456e-06
ZNF594	-0.978917	2.19368	0.000322608	0.00777851		RGPD6	0.87634	4.25516	3.86799e-05	0.00139546
DHX33	0.722489	3.9249	0.00187413	0.0303733		RGPD8	0.986102	4.12054	1.18933e-06	7.61872e-05
CD68	2.05505	3.39448	6.27493e-09	7.71959e-07		SLC20A1	0.86142	3.9033	0.000440729	0.00983779
TP53	0.811595	2.91037	0.000857536	0.0168183		RND3	3.3023	5.62075	1.30383e-11	3.06853e-09
PER1	-1.82756	6.6059	1.0831e-08	1.23428e-06		XIRP2	2.31592	12.6819	3.50975e-07	2.63865e-05
PMP22	1.45936	6.2874	1.01467e-05	0.000450199		CERS6	0.877655	3.08306	0.000127867	0.00384525
MIEF2	1.14347	6.11773	4.5899e-05	0.0016081		ZNF385B	1.87694	3.61269	0.000284026	0.00707229
MAP2K3	1.86128	7.57791	1.76953e-07	1.4818e-05		ITGAV	0.733217	5.87792	0.000169821	0.00477585
ZNF207	0.621645	5.96991	0.000728126	0.0148171		TFPI	0.945927	4.61628	0.00206262	0.0324562
DUSP14	2.45603	4.18431	4.63061e-13	1.79039e-10		NABP1	1.57166	2.01265	9.76421e-07	6.56567e-05
SOCS7	1.58116	5.60646	1.10131e-08	1.24196e-06		STK17B	1.5888	2.77883	1.81168e-06	0.00010836
RARA	1.6581	4.89787	1.39055e-05	0.000590358		COQ10B	0.804643	3.7648	0.00317554	0.0448805
PLEKHH3	-0.951907	4.40732	4.03512e-06	0.000208652		MARS2	0.708589	3.36996	0.00342823	0.0475962
GPATCH8	-0.825866	5.83799	0.000703578	0.0144534		C2orf69	1.18113	4.37574	2.53334e-09	3.47163e-07
MAP3K14	2.02458	4.89162	1.40583e-09	2.00257e-07		BZW1	0.984551	5.45502	1.81543e-05	0.000750146
PLEKHM1	0.991014	3.96404	0.000474744	0.0104463		NOP58	0.861761	4.79202	0.000164163	0.00466661
COL1A1	1.15665	5.69091	0.000562525	0.011988		RAPH1	1.39308	4.9978	2.56223e-06	0.000144472
LRRC59	0.642701	4.03764	0.00156473	0.026882		TUBA4A	0.944648	8.13556	0.00194695	0.0311206
SPAG9	0.709231	7.21729	0.00179134	0.0295175		ACSL3	1.19716	6.03785	6.5398e-09	7.95504e-07
HLF	-1.25526	3.64071	2.52136e-05	0.000974866		WDFY1	0.862682	5.05898	0.000837397	0.0166038
VEZF1	-0.524306	5.59539	0.00362318	0.0494635		CHRND	1.72745	4.51329	2.17445e-05	0.000875116
MTMR4	-0.835526	3.73947	0.00244112	0.0365021		DGKD	2.40233	7.80056	7.09105e-11	1.41812e-08
CA4	-1.15521	3.61023	0.00110846	0.0205835		BOK	0.995932	2.39149	0.00109135	0.0203007
PPM1D	0.781941	3.24245	0.000505401	0.0109649		SRXN1	1.84565	5.01917	2.77962e-06	0.000154319
GNA13	0.857523	6.0504	5.38856e-05	0.00185195		PRNP	0.900899	5.67401	0.000205084	0.00548207
PSMD12	0.589013	5.14793	0.00144887	0.0254221		THBD	2.3614	5.83352	4.73334e-08	4.52358e-06
KPNA2	1.15819	2.78314	4.04738e-06	0.000208652		NANP	0.794121	2.44829	0.000905647	0.0175081
SOX9-AS1	-0.758576	3.80308	0.00357132	0.0490648		MAPRE1	0.579081	5.03218	0.00157996	0.0268941
SOX9	1.92213	2.74253	0.000127508	0.00384512		TP53INP2	1.12387	6.81318	0.00284349	0.0412649
C17orf80	-0.703737	4.70891	0.000965264	0.0183332		RBM12	1.09806	5.02172	1.46114e-06	9.14351e-05
GPRC5C	-0.616459	5.15961	0.00116164	0.0212557		PKIG	0.929739	5.38676	0.000192058	0.00517219
RECQL5	-0.738227	2.63175	0.00316089	0.0447318		SDC4	2.32126	6.61858	1.87928e-13	7.82503e-11
TRIM65	-0.760515	3.66259	0.000253142	0.00644827		KCNB1	1.42594	4.34987	0.00113016	0.0209147
UBALD2	-0.739627	4.67623	0.0011581	0.0212502		PTPN1	1.27784	5.47446	4.50917e-05	0.00159011
TNRC6C	-0.689472	4.02683	0.001664	0.02806		ADAMTS1	1.49553	5.2923	9.67203e-06	0.000434479
PPP1R27	2.53405	9.13062	6.74255e-13	2.43316e-10		MAP3K7CL	1.10733	4.34424	0.000145409	0.00423778
PYCR1	1.04697	2.21646	0.00244842	0.0365608		BACH1	1.09747	5.24248	1.08276e-06	7.19139e-05
METRNL	0.862759	2.09056	0.00358332	0.0490718		URB1	0.861694	4.22991	0.00217479	0.0335388
COLEC12	-0.928778	3.54831	0.00214192	0.0332689		RCAN1	2.33951	5.84914	3.18646e-09	4.2069e-07
TUBB6	0.922531	3.96764	0.000843121	0.0166867		DYRK1A	0.689426	6.54267	0.00194676	0.0311206
CEP192	-0.86252	3.34317	0.00269986	0.0394449		ETS2	0.749315	5.67442	0.00061011	0.0129005
NPC1	1.09695	3.73846	8.43177e-05	0.00266129		ZBTB21	1.14216	3.35212	0.000221278	0.00580038
AQP4	-1.04013	6.5865	0.000939056	0.0179933		PKNOX1	0.730768	4.31084	0.00313594	0.0444367
GAREM	1.39716	3.71568	0.000145617	0.00423778		SIK1	4.35889	5.14977	6.01836e-10	9.44273e-08
C18orf25	0.708392	5.55458	0.000551418	0.0117977		PCNT	0.839758	7.65097	0.000952036	0.0181777
ZCCHC2	1.12644	5.05475	2.68134e-05	0.00102573		ARVCF	1.21072	4.60681	2.43779e-05	0.000959691
SOCS6	1.65052	5.94698	5.8976e-10	9.38933e-08		KIAA1671	1.45355	6.46184	2.449e-05	0.000960611
TSHZ1	-0.821294	4.01238	0.000845639	0.016706		LOC100128531	1.31841	3.5619	0.00119996	0.0217965
FSTL3	1.12009	2.55373	0.000861418	0.0168638		MYH9	1.57119	8.14629	1.55309e-06	9.55329e-05
MIDN	1.92188	6.95982	6.2505e-05	0.00206935		MAFF	4.89896	5.43286	1.32263e-13	5.72752e-11
DOT1L	1.74406	5.29933	1.18704e-07	1.04479e-05		LDOC1L	0.948096	5.12045	0.00140032	0.0248115
GADD45B	2.22141	3.58348	1.32842e-05	0.000566737		KIAA0930	0.901358	5.61943	0.000245724	0.00629317
ZNF554	-0.868064	2.1243	0.00165773	0.0279977		LMCD1	2.54288	9.68438	2.30811e-08	2.37978e-06
ZNF555	-1.05517	2.35261	5.57416e-05	0.00190365		LINC00312	1.67272	4.77138	0.000394488	0.00906737
MFSD12	1.15665	2.93011	0.000129544	0.00386549		TMEM43	0.931622	5.65277	1.312e-05	0.00056364
NMRK2	1.08582	7.23953	0.00122407	0.0220985		SH3BP5	1.81547	3.04572	1.92145e-06	0.00011367
DAPK3	1.20485	5.66108	7.97553e-06	0.000364317		EAF1	0.829583	3.82516	0.000275028	0.00690825
SH3GL1	0.792823	3.7272	0.00260191	0.0384659		COLQ	1.29278	4.20277	0.000482478	0.0105949
JUNB	1.31306	4.03696	8.35746e-05	0.00265331		ANKRD28	0.682082	6.45496	0.00305309	0.0435477
LOC284454	1.29542	3.93795	0.000345627	0.00816977		CSRNP1	2.13819	5.21638	4.77815e-06	0.000238379
CD97	1.19263	5.05195	3.17594e-05	0.00118971		XIRP1	5.4446	12.6114	5.51956e-13	2.06051e-10
DNAJB1	1.27896	5.87661	0.00190707	0.0307587		KLHL40	4.26518	10.8355	3.99574e-12	1.13837e-09
TPM4	0.906586	5.68127	0.00143777	0.0253095		HHATL	1.57519	8.41777	3.13717e-09	4.19297e-07
KLF2	-0.798449	4.58312	0.0030684	0.043704		MAPKAPK3	0.661902	7.53007	0.0024286	0.036476
PLVAP	1.02125	3.84312	0.000869394	0.0169893		GNL3	0.570493	5.5129	0.0030933	0.0439475
SLC27A1	-0.979755	4.92731	5.10613e-06	0.000251475		ITIH4	1.04425	7.20733	0.00218727	0.0336354
ARRDC2	-1.54841	6.3579	0.000915897	0.0176747		MUSTN1	1.80922	5.24913	6.92642e-05	0.00225181
JUND	1.48961	6.66229	1.51331e-06	9.36177e-05		SFMBT1	0.760965	4.53729	0.000352706	0.00831894
GATAD2A	0.905443	4.5708	0.000409598	0.0093354		SLMAP	1.1893	7.43405	8.94004e-07	6.04905e-05
PLEKHF1	-1.81564	4.51596	4.23281e-11	9.16487e-09		KBTBD8	3.22479	3.86966	2.28082e-08	2.37425e-06
ZNF507	0.749874	4.7145	0.000240365	0.00621048		RYBP	0.890307	3.97802	0.00172546	0.0287602
RGS9BP	-0.897175	2.58854	0.00145688	0.0254801		CBLB	0.820712	3.53005	0.000412645	0.00936648
UBA2	0.687892	6.4103	0.00105874	0.0198304		KPNA1	1.07013	7.62426	2.77978e-07	2.16503e-05
ZNF529	0.738135	3.59131	0.0015026	0.0260275		SEC61A1	0.9584	6.50978	1.88164e-06	0.000111926
SERTAD1	1.52283	4.06445	4.7513e-06	0.000238137		SRPRB	0.688791	4.24701	0.00104713	0.0196468
PVR	1.8239	6.07764	2.14864e-06	0.00012373		MRAS	0.639595	5.46362	0.00259559	0.0384402
FBXO46	-1.10183	2.65226	1.04908e-05	0.000461654		ATP1B3	0.926469	3.78467	2.20174e-05	0.000882818
DBP	-1.2612	4.00495	5.48145e-06	0.000266108		CHST2	0.882446	1.78022	0.00302507	0.0432621
MAMSTR	-0.753569	5.03651	0.00186478	0.030358		LOC646903	1.23426	4.90788	0.00218265	0.0336122
PLEKHA4	1.08976	3.73239	4.02813e-05	0.00143449		TSC22D2	1.70624	5.01565	1.12752e-07	1.00054e-05
PPP1R15A	1.52168	6.08255	3.55982e-06	0.000188915		FNDC3B	1.5537	5.53151	1.7847e-08	1.91298e-06
PRR12	-0.912733	3.85697	0.000643246	0.0134177		ATP11B	0.664923	5.00727	0.0013836	0.0245958
ZNF549	-0.868161	2.15163	0.00137436	0.0244718		MCF2L2	2.43163	3.61346	2.02423e-14	1.09571e-11
ADAM17	0.674838	3.59361	0.00293511	0.0421986		B3GNT5	0.944009	3.75717	0.00298783	0.0428427
YWHAQ	0.671178	5.41925	0.000707795	0.0145125		FAM131A	0.738636	3.55332	0.00177961	0.0294139
ODC1	0.886463	6.8208	0.000167987	0.00474837		ETV5	1.02037	2.34579	0.00168714	0.0283617
GREB1	-0.880915	2.23668	0.00197068	0.0313392		ATP13A3	1.23036	5.18848	1.6072e-06	9.72042e-05
FAM49A	1.06095	4.6357	7.7422e-06	0.000355157		KIAA0226	1.97311	4.78806	1.16315e-12	3.93508e-10
KLHL29	1.65868	3.47072	7.41444e-06	0.000347484		FYTTD1	1.00769	7.77549	2.2835e-05	0.000908865
EPT1	0.824455	4.25916	0.000418374	0.00947557		DOK7	1.28084	4.70201	2.97421e-05	0.00112191
TRIM54	1.03212	8.80871	6.74862e-05	0.00222068		ZBTB49	1.03513	2.10404	0.00114222	0.0209944
WDR43	1.21562	5.02132	2.9547e-06	0.000162804		WDR1	1.44941	7.20004	1.21084e-06	7.71093e-05
CRIM1	0.977337	6.38658	0.000170283	0.00477585		PPARGC1A	2.78641	8.03393	2.61906e-20	3.54425e-17
STRN	1.16143	5.49324	1.05546e-07	9.44336e-06		RELL1	1.02439	3.28557	3.84709e-06	0.000200233
CDC42EP3	0.901002	5.31426	0.000145182	0.00423778		UGDH	0.881469	2.41738	0.00227582	0.0347503
SOS1	-0.540427	5.20105	0.00347557	0.0481157		BMP2K	1.19187	3.27563	0.00018345	0.00504642
LGALSL	-0.911578	5.73268	5.50457e-05	0.00188584		RASGEF1B	1.5847	2.86168	0.00176859	0.0292823
PNO1	0.836052	3.91258	3.84433e-05	0.00139193		AGPAT9	1.62631	6.07698	4.87509e-08	4.58937e-06
AAK1	0.59803	4.26446	0.00195514	0.0311728		TSPAN5	1.86894	3.60106	0.00161387	0.0273423
MXD1	1.52581	4.24944	2.1625e-05	0.000873554		EIF4E	2.77279	5.9412	1.61919e-11	3.72966e-09
MAT2A	0.972181	7.56491	0.000508891	0.0110185		LOC285556	1.84409	8.86072	5.64588e-05	0.00191007
RGPD1	0.929171	2.90182	0.000150831	0.00437774		SGMS2	2.89877	4.50959	7.3783e-12	1.90184e-09
RGPD2	1.08257	2.85079	3.54399e-05	0.00130058		SYNPO2	1.23955	11.1682	0.000487266	0.0106354
EIF2AK3	2.20324	4.03596	9.16362e-10	1.39726e-07		CCRN4L	1.84386	3.56045	3.47399e-06	0.000186185
ARID5A	2.82393	5.91306	2.60775e-15	2.01654e-12		NAA15	0.591385	5.44493	0.00242927	0.036476
TMEM131	-0.814813	5.70989	0.000133268	0.00394197		ABCE1	0.94039	4.87902	3.4988e-06	0.000186591
RNF149	1.68812	4.31362	1.10313e-06	7.2379e-05		FBXW7	0.840431	5.8422	0.00131823	0.0236277
IL1R1	2.12681	5.32995	3.87744e-08	3.8161e-06		ANXA2P1	1.17978	2.52386	0.000183917	0.00504642
RGPD3	1.00064	3.36583	3.73779e-06	0.000195484		FNIP2	3.22745	6.81398	1.1026e-17	1.08516e-14
RGPD4	0.822326	3.43326	0.000282816	0.00707105		RAPGEF2	0.55438	5.30611	0.00205051	0.0323128
LIMS1	1.71308	6.72842	9.10979e-08	8.21855e-06		ASB5	3.29401	10.7936	5.84243e-22	1.265e-18
RANBP2	0.866025	6.81648	8.42564e-05	0.00266129		ANKRD37	2.06484	3.76767	9.29229e-12	2.28633e-09
RGPD5	0.983636	4.33397	5.1983e-06	0.000254646		UBE2QL1	1.38598	5.85805	6.837e-05	0.00223111
LIMS3	1.95033	2.51711	1.00129e-06	6.69135e-05		FAM134B	1.08457	8.08701	0.000191487	0.00516967
LIMS3L	2.00894	4.09837	1.53133e-08	1.67456e-06		GDNF	1.96357	3.08713	5.67738e-07	3.99113e-05
RGPD6	0.87634	4.25516	3.86799e-05	0.00139546		OSMR	1.0871	3.27518	0.000377388	0.00874861
ZC3H6	-1.06705	4.59839	7.46353e-06	0.000348211		RICTOR	1.15691	6.28535	3.01068e-06	0.000163787
RGPD8	0.986102	4.12054	1.18933e-06	7.61872e-05		PELO	0.754217	4.60636	0.000396324	0.00909027
SLC20A1	0.86142	3.9033	0.000440729	0.00983779		PPAP2A	0.69086	5.21397	0.000160293	0.00461524
PAX8-AS1	-1.07104	2.12089	0.0021733	0.0335388		PLK2	1.26865	4.32201	0.00300618	0.0430487
RND3	3.3023	5.62075	1.30383e-11	3.06853e-09		PDE4D	1.32957	7.69677	7.52756e-06	0.000348262
RBM43	-1.09703	2.41308	0.00212328	0.0330321		DIMT1	0.665523	3.77603	0.00255357	0.0379217
XIRP2	2.31592	12.6819	3.50975e-07	2.63865e-05		MAST4	2.98917	5.92663	1.82256e-12	5.9791e-10
CERS6	0.877655	3.08306	0.000127867	0.00384525		UTP15	0.649825	3.46495	0.00181622	0.0297914
ZNF385B	1.87694	3.61269	0.000284026	0.00707229		HOMER1	1.0529	6.15409	3.41397e-05	0.00126037
ITGAV	0.733217	5.87792	0.000169821	0.00477585		ELL2	0.919181	3.93456	0.00156899	0.026882
TFPI	0.945927	4.61628	0.00206262	0.0324562		CAST	1.08842	8.33876	4.12493e-05	0.00146415
NABP1	1.57166	2.01265	9.76421e-07	6.56567e-05		LNPEP	0.9945	4.26641	9.81974e-06	0.000439291
STK17B	1.5888	2.77883	1.81168e-06	0.00010836		37681	1.59475	3.83332	1.59768e-06	9.71713e-05
COQ10B	0.804643	3.7648	0.00317554	0.0448805		FNIP1	0.662412	5.33246	0.000463959	0.0103138
MARS2	0.708589	3.36996	0.00342823	0.0475962		SLC22A5	0.774503	4.16862	0.00132829	0.0237295
C2orf69	1.18113	4.37574	2.53334e-09	3.47163e-07		PPP2CA	1.02618	6.73525	1.1148e-06	7.27036e-05
BZW1	0.984551	5.45502	1.81543e-05	0.000750146		SPOCK1	0.948894	3.30264	0.00158594	0.0269535
NOP58	0.861761	4.79202	0.000164163	0.00466661		FAM13B	0.677197	3.81954	0.00150107	0.0260275
RAPH1	1.39308	4.9978	2.56223e-06	0.000144472		EGR1	3.45879	5.09074	1.74491e-08	1.88904e-06
ZDBF2	-0.889464	4.10755	2.49366e-05	0.000971091		ETF1	0.703635	6.46133	0.000554666	0.0118438
PLEKHM3	-0.825386	3.21096	0.00142038	0.0250849		CYSTM1	0.785811	6.90751	0.000207472	0.00551866
IDH1	-0.722124	4.10958	0.000621362	0.0130873		HBEGF	3.56733	7.08742	1.37966e-20	2.13374e-17
IKZF2	-0.822759	3.42542	0.00181031	0.0297396		DIAPH1	1.75863	7.44732	1.09425e-09	1.64532e-07
BARD1	-1.36999	2.88306	5.62425e-05	0.00190872		CSNK1A1	0.896745	6.62177	0.000173614	0.00484418
TUBA4A	0.944648	8.13556	0.00194695	0.0311206		GPX3	0.91844	7.00651	0.000136027	0.0040126
ACSL3	1.19716	6.03785	6.5398e-09	7.95504e-07		SLC36A1	0.991511	3.11801	0.00154807	0.0266446
WDFY1	0.862682	5.05898	0.000837397	0.0166038		CPEB4	2.4553	7.78816	1.49153e-14	8.9707e-12
CHRND	1.72745	4.51329	2.17445e-05	0.000875116		NOP16	0.755879	4.46712	0.000854924	0.0167975
DGKD	2.40233	7.80056	7.09105e-11	1.41812e-08		HNRNPAB	0.793392	5.44846	0.000254255	0.00646142
BOK	0.995932	2.39149	0.00109135	0.0203007		RNF144B	1.1887	7.45737	3.39677e-06	0.000182952
TCF15	-1.57941	2.97786	1.60612e-05	0.000676572		E2F3	0.711588	3.45567	0.00144228	0.0253476
SRXN1	1.84565	5.01917	2.77962e-06	0.000154319		SOX4	1.4935	3.57688	5.91619e-05	0.00197073
PRNP	0.900899	5.67401	0.000205084	0.00548207		TRIM38	0.918412	3.50736	0.000888314	0.0173277
THBD	2.3614	5.83352	4.73334e-08	4.52358e-06		IER3	1.40402	2.68814	0.000123237	0.00373715
NANP	0.794121	2.44829	0.000905647	0.0175081		HSPA1L	2.41649	4.14403	6.53199e-07	4.53304e-05
ID1	-1.04987	4.57376	0.00347019	0.0481027		HSPA1A	3.70536	9.79489	1.65133e-10	2.9307e-08
MAPRE1	0.579081	5.03218	0.00157996	0.0268941		HSPA1B	3.69754	9.65621	4.16811e-10	7.16254e-08
TP53INP2	1.12387	6.81318	0.00284349	0.0412649		PPARD	0.87063	5.10388	0.00201603	0.0319087
RBM12	1.09806	5.02172	1.46114e-06	9.14351e-05		SRSF3	0.707852	6.1181	0.000374208	0.00869351
NDRG3	-0.857794	3.79902	0.00279748	0.0406517		CDKN1A	4.48619	5.32413	6.4214e-18	6.95181e-15
RBL1	-0.861915	3.8103	0.00260442	0.0384659		PIM1	1.56255	3.97028	0.000331017	0.00794409
PKIG	0.929739	5.38676	0.000192058	0.00517219		BYSL	1.12891	3.55683	2.14292e-05	0.000868886
SDC4	2.32126	6.61858	1.87928e-13	7.82503e-11		POLR1C	0.761308	2.70948	0.00230115	0.0350384
ZMYND8	-0.993315	3.76445	0.00032766	0.00788276		VEGFA	0.825755	7.46651	0.000164232	0.00466661
KCNB1	1.42594	4.34987	0.00113016	0.0209147		SLC17A5	0.820226	3.19176	0.00114029	0.0209944
CEBPB	-0.970669	6.57597	0.00126042	0.0226667		AKIRIN2	1.28244	5.83547	7.29426e-07	4.96652e-05
PTPN1	1.27784	5.47446	4.50917e-05	0.00159011		BACH2	1.02756	3.74042	0.000299713	0.00734094
FAM217B	-0.809135	4.84413	0.000996584	0.018829		AMD1	1.25154	5.76197	2.63474e-08	2.69091e-06
ADAMTS1	1.49553	5.2923	9.67203e-06	0.000434479		SLC16A10	0.901156	5.05402	0.00131318	0.0235763
MAP3K7CL	1.10733	4.34424	0.000145409	0.00423778		VGLL2	2.89017	8.10521	5.39669e-20	6.49162e-17
BACH1	1.09747	5.24248	1.08276e-06	7.19139e-05		SMPDL3A	0.83109	5.24456	0.000748311	0.0151993
URB1	0.861694	4.22991	0.00217479	0.0335388		SGK1	1.50557	6.23865	1.11305e-09	1.65066e-07
RCAN1	2.33951	5.84914	3.18646e-09	4.2069e-07		TNFAIP3	1.37372	3.67128	1.42585e-07	1.2251e-05
DYRK1A	0.689426	6.54267	0.00194676	0.0311206		CITED2	1.5774	6.05685	5.66711e-06	0.000273893
ETS2	0.749315	5.67442	0.00061011	0.0129005		KATNA1	0.685086	3.85903	0.00194899	0.0311206
ZBTB21	1.14216	3.35212	0.000221278	0.00580038		SYNE1	0.723181	6.95735	0.00157937	0.0268941
PKNOX1	0.730768	4.31084	0.00313594	0.0444367		SYNJ2	2.52352	4.12191	2.72199e-09	3.68353e-07
SIK1	4.35889	5.14977	6.01836e-10	9.44273e-08		TULP4	0.899541	4.87981	0.00172944	0.0287602
PCNT	0.839758	7.65097	0.000952036	0.0181777		DYNLT1	0.878339	4.90358	4.57674e-05	0.0016081
CECR2	-0.889644	5.43459	0.00048725	0.0106354		MAFK	1.50211	5.62376	2.43934e-06	0.000138991
ARVCF	1.21072	4.60681	2.43779e-05	0.000959691		HDAC9	1.29652	5.53738	0.000210366	0.00558191
KIAA1671	1.45355	6.46184	2.449e-05	0.000960611		DFNA5	1.26218	2.18458	0.0001812	0.00501145
LOC100128531	1.31841	3.5619	0.00119996	0.0217965		WIPF3	1.63241	5.65081	1.04154e-05	0.000460232
PIK3IP1	-1.21886	4.31922	3.1001e-05	0.00116533		STK17A	1.1718	3.79403	1.72669e-05	0.000721743
MYH9	1.57119	8.14629	1.55309e-06	9.55329e-05		UPP1	0.885479	2.59805	0.00170845	0.0285868
MAFF	4.89896	5.43286	1.32263e-13	5.72752e-11		AUTS2	2.64002	5.08334	9.89837e-13	3.45676e-10
TAB1	-0.641562	4.30229	0.00328805	0.0462117		TBL2	0.998254	3.29284	0.000284172	0.00707229
TNRC6B	-0.646723	4.54095	0.00307212	0.043704		HSPB1	1.93625	10.0295	5.40043e-09	6.79826e-07
TEF	-0.933964	5.99017	9.94751e-05	0.00310351		SEMA3C	1.17734	6.04718	2.55252e-07	2.00243e-05
TOB2	-1.62766	6.42741	1.16319e-09	1.70172e-07		CLDN12	0.667279	5.0871	0.00157093	0.026882
LDOC1L	0.948096	5.12045	0.00140032	0.0248115		PEG10	2.17443	3.35282	1.26287e-07	1.10257e-05
KIAA0930	0.901358	5.61943	0.000245724	0.00629317		SMURF1	0.935518	4.35054	0.000143011	0.00419577
LMCD1	2.54288	9.68438	2.30811e-08	2.37978e-06		ORAI2	1.08356	1.8646	0.000188474	0.0051313
LINC00312	1.67272	4.77138	0.000394488	0.00906737		SRPK2	2.13997	5.20791	1.34882e-08	1.49003e-06
SLC6A1	-1.56502	2.73318	1.64243e-05	0.000689185		PNPLA8	1.36407	5.98421	3.5608e-07	2.65857e-05
NUP210	-0.914073	3.09212	0.000317425	0.00767063		IFRD1	3.05157	7.46175	4.79662e-12	1.33149e-09
TMEM43	0.931622	5.65277	1.312e-05	0.00056364		LMOD2	0.892862	10.2133	0.00100961	0.0190418
SH3BP5	1.81547	3.04572	1.92145e-06	0.00011367		CALU	0.963944	6.68567	7.75924e-05	0.00248525
EAF1	0.829583	3.82516	0.000275028	0.00690825		CCDC136	2.11304	2.83788	2.37463e-07	1.89027e-05
COLQ	1.29278	4.20277	0.000482478	0.0105949		FLNC	2.60601	12.9153	5.74641e-06	0.000276492
ANKRD28	0.682082	6.45496	0.00305309	0.0435477		STRIP2	1.22267	6.02917	1.96848e-06	0.000115193
PLCL2	-1.06714	5.49156	2.55019e-06	0.000144472		PRKAG2	2.95448	5.06993	2.56106e-13	1.02689e-10
NR1D2	-1.03206	6.61287	2.87137e-05	0.00108691		ANGPT2	1.50812	2.34305	0.00107224	0.0199794
ACVR2B	-1.38868	3.88376	2.88444e-08	2.89138e-06		MFHAS1	1.13293	2.41225	0.00132786	0.0237295
CSRNP1	2.13819	5.21638	4.77815e-06	0.000238379		CTSB	0.751151	7.43932	0.00106377	0.0198902
XIRP1	5.4446	12.6114	5.51956e-13	2.06051e-10		VPS37A	0.654597	5.11739	0.00250121	0.0372977
CX3CR1	-0.850375	2.26302	0.00340831	0.0474272		LZTS1	1.05661	2.10816	0.000298516	0.00734094
ZNF619	-0.861415	1.83303	0.00221902	0.034027		LOXL2	1.00112	2.69526	0.000602483	0.0127642
KLHL40	4.26518	10.8355	3.99574e-12	1.13837e-09		NKX3-1	0.89927	2.49275	0.000627825	0.0131722
HHATL	1.57519	8.41777	3.13717e-09	4.19297e-07		PPP2CB	1.05604	6.26604	4.44992e-06	0.000224393
SLC38A3	-1.34046	4.94183	4.11142e-06	0.000210949		FGFR1	0.909309	5.73564	0.000441838	0.00984225
MAPKAPK3	0.661902	7.53007	0.0024286	0.036476		FAM110B	2.25169	5.15128	5.13182e-15	3.70381e-12
DUSP7	-0.868953	4.5469	5.69632e-05	0.00191067		SDCBP	0.663869	5.685	0.000624563	0.0131292
GNL3	0.570493	5.5129	0.0030933	0.0439475		TRIM55	1.46121	5.65299	1.23829e-05	0.000536231
ITIH4	1.04425	7.20733	0.00218727	0.0336354		SLCO5A1	1.38308	4.6029	2.82219e-05	0.00107204
MUSTN1	1.80922	5.24913	6.92642e-05	0.00225181		HEY1	1.04947	3.80271	0.00351122	0.0484471
SFMBT1	0.760965	4.53729	0.000352706	0.00831894		ZBTB10	0.633935	4.63287	0.00168998	0.0283654
SLMAP	1.1893	7.43405	8.94004e-07	6.04905e-05		AZIN1	0.819708	6.32436	0.000655464	0.0136463
KBTBD8	3.22479	3.86966	2.28082e-08	2.37425e-06		ABRA	3.26187	9.67495	7.41264e-32	8.02493e-28
RYBP	0.890307	3.97802	0.00172546	0.0287602		MYC	3.74122	4.93173	8.45923e-12	2.12976e-09
CBLB	0.820712	3.53005	0.000412645	0.00936648		AGO2	1.11763	4.40949	0.000133185	0.00394197
KPNA1	1.07013	7.62426	2.77978e-07	2.16503e-05		MAFA	1.20226	5.17707	8.08931e-05	0.00257573
ZNF148	-0.705391	4.63944	0.00189625	0.0306399		SCXB	1.04553	2.52375	0.000175046	0.00487158
SEC61A1	0.9584	6.50978	1.88164e-06	0.000111926		VLDLR	0.702283	5.91862	0.00152535	0.0263793
GATA2	-0.895595	3.03538	0.00340702	0.0474272		KIAA0020	0.774827	2.6455	0.00215379	0.0334053
SRPRB	0.688791	4.24701	0.00104713	0.0196468		CDC37L1	1.55547	6.68895	3.68741e-10	6.43869e-08
MRAS	0.639595	5.46362	0.00259559	0.0384402		RCL1	0.717096	4.34637	0.00253362	0.0376826
ATP1B3	0.926469	3.78467	2.20174e-05	0.000882818		JAK2	0.987483	5.72747	7.92716e-05	0.00253155
CHST2	0.882446	1.78022	0.00302507	0.0432621		DNAJA1	0.990296	5.15712	2.02171e-07	1.64564e-05
LOC646903	1.23426	4.90788	0.00218265	0.0336122		ANXA2P2	1.29318	5.81782	4.45636e-06	0.000224393
TSC22D2	1.70624	5.01565	1.12752e-07	1.00054e-05		DNAJB5	1.23363	7.84252	0.000128739	0.00386074
P2RY1	-0.94385	3.42402	0.000158646	0.00458001		FAM214B	0.989189	3.72123	0.000824327	0.016444
FNDC3B	1.5537	5.53151	1.7847e-08	1.91298e-06		RUSC2	0.949473	6.24467	0.000205689	0.00548469
ATP11B	0.664923	5.00727	0.0013836	0.0245958		SHB	1.57947	3.07574	3.40367e-05	0.00126037
MCF2L2	2.43163	3.61346	2.02423e-14	1.09571e-11		SMC5	1.23058	5.40564	5.52905e-07	3.91225e-05
B3GNT5	0.944009	3.75717	0.00298783	0.0428427		TMEM2	1.16913	4.13748	7.63418e-06	0.000351692
ABCC5	-0.936753	6.06327	0.00090479	0.0175081		TLE4	0.929036	5.36633	1.91334e-05	0.000778714
FAM131A	0.738636	3.55332	0.00177961	0.0294139		FRMD3	1.97441	7.11099	3.75009e-07	2.78072e-05
ETV5	1.02037	2.34579	0.00168714	0.0283617		UBQLN1	0.694901	7.02162	0.00185403	0.0302286
MASP1	-0.729656	4.16832	0.000941233	0.0180032		NFIL3	2.55814	4.49727	2.86481e-12	8.86126e-10
HES1	-0.981814	3.45758	0.00114012	0.0209944		NR4A3	6.03267	7.47303	1.92968e-28	1.04453e-24
ATP13A3	1.23036	5.18848	1.6072e-06	9.72042e-05		RALGAPA1P	0.760838	4.37133	0.000299175	0.00734094
KIAA0226	1.97311	4.78806	1.16315e-12	3.93508e-10		TMEM38B	0.742692	7.06352	0.000251271	0.00641569
FYTTD1	1.00769	7.77549	2.2835e-05	0.000908865		ZNF462	1.21079	4.60376	4.45726e-05	0.00157694
DOK7	1.28084	4.70201	2.97421e-05	0.00112191		CTNNAL1	0.862142	5.0626	0.000484165	0.0106105
ZBTB49	1.03513	2.10404	0.00114222	0.0209944		UGCG	1.4141	3.60065	3.97519e-05	0.00142031
WDR1	1.44941	7.20004	1.21084e-06	7.71093e-05		SLC31A2	0.613847	3.78106	0.00342925	0.0475962
PPARGC1A	2.78641	8.03393	2.61906e-20	3.54425e-17		HSPA5	0.799091	6.61079	9.54048e-05	0.00298512
RELL1	1.02439	3.28557	3.84709e-06	0.000200233		ZBTB43	1.50016	6.37249	7.11238e-09	8.5554e-07
UGDH	0.881469	2.41738	0.00227582	0.0347503		ANGPTL2	1.3049	6.51985	1.05328e-05	0.000461654
TECRL	-0.81856	5.85853	0.0011392	0.0209944		FAM102A	4.15004	5.27608	1.54656e-10	2.83781e-08
BMP2K	1.19187	3.27563	0.00018345	0.00504642		TUBB4B	0.992077	6.36345	6.84213e-05	0.00223111
RASGEF1B	1.5847	2.86168	0.00176859	0.0292823		KLHL34	1.42484	5.5638	0.000502258	0.0109186
AGPAT9	1.62631	6.07698	4.87509e-08	4.58937e-06		ACOT9	0.753618	4.3713	0.000541329	0.0116278
PPM1K	-0.872775	4.44544	0.00321518	0.0453815		SAT1	0.853026	4.08617	0.0032277	0.0454988
TSPAN5	1.86894	3.60106	0.00161387	0.0273423		DYNLT3	1.08189	3.56702	6.15687e-06	0.000293631
EIF4E	2.77279	5.9412	1.61919e-11	3.72966e-09		TIMP1	1.19158	3.56377	4.88477e-05	0.00169495
LOC285556	1.84409	8.86072	5.64588e-05	0.00191007		CLCN5	0.978598	3.981	0.00233088	0.0354411
SGMS2	2.89877	4.50959	7.3783e-12	1.90184e-09		MSN	1.15813	6.69851	4.91564e-06	0.000244113
SYNPO2	1.23955	11.1682	0.000487266	0.0106354		STARD8	1.28135	4.82362	0.000140778	0.00414146
CCRN4L	1.84386	3.56045	3.47399e-06	0.000186185		PBDC1	0.733539	3.50428	0.00146229	0.0255335
NAA15	0.591385	5.44493	0.00242927	0.036476		ARMCX1	0.986998	4.83467	6.4664e-06	0.00030704
GAB1	-1.91539	5.2662	1.62613e-10	2.9307e-08		LONRF3	3.06162	3.80796	4.07985e-14	2.00766e-11
ABCE1	0.94039	4.87902	3.4988e-06	0.000186591		SLC25A5	0.688726	4.34622	0.00142589	0.0251411
NR3C2	-0.770204	4.40781	0.000295775	0.007294		APLN	1.4863	2.2652	3.93352e-05	0.00141008
FBXW7	0.840431	5.8422	0.00131823	0.0236277
ANXA2P1	1.17978	2.52386	0.000183917	0.00504642
GLRB	-0.816822	1.94929	0.00330584	0.0463588
FNIP2	3.22745	6.81398	1.1026e-17	1.08516e-14
RAPGEF2	0.55438	5.30611	0.00205051	0.0323128
ASB5	3.29401	10.7936	5.84243e-22	1.265e-18
IRF2	-0.678783	4.14094	0.00184784	0.030199
ANKRD37	2.06484	3.76767	9.29229e-12	2.28633e-09
LRRC14B	-0.774584	5.50253	0.00154611	0.0266446
UBE2QL1	1.38598	5.85805	6.837e-05	0.00223111
FAM134B	1.08457	8.08701	0.000191487	0.00516967
SLC1A3	-0.988754	3.90695	0.000958605	0.0182388
GDNF	1.96357	3.08713	5.67738e-07	3.99113e-05
OSMR	1.0871	3.27518	0.000377388	0.00874861
RICTOR	1.15691	6.28535	3.01068e-06	0.000163787
SEPP1	-0.916666	5.74589	0.00097821	0.0185142
NNT-AS1	-0.675317	4.78695	0.002676	0.0393086
PELO	0.754217	4.60636	0.000396324	0.00909027
PPAP2A	0.69086	5.21397	0.000160293	0.00461524
PLK2	1.26865	4.32201	0.00300618	0.0430487
PDE4D	1.32957	7.69677	7.52756e-06	0.000348262
DIMT1	0.665523	3.77603	0.00255357	0.0379217
MAST4	2.98917	5.92663	1.82256e-12	5.9791e-10
UTP15	0.649825	3.46495	0.00181622	0.0297914
HOMER1	1.0529	6.15409	3.41397e-05	0.00126037
ELL2	0.919181	3.93456	0.00156899	0.026882
CAST	1.08842	8.33876	4.12493e-05	0.00146415
LNPEP	0.9945	4.26641	9.81974e-06	0.000439291
RGMB	-0.687768	5.12326	0.000115597	0.00353655
NUDT12	-0.858197	4.47192	0.000262567	0.00664149
37681	1.59475	3.83332	1.59768e-06	9.71713e-05
SLC12A2	-1.11806	5.58264	1.10376e-05	0.000479891
FNIP1	0.662412	5.33246	0.000463959	0.0103138
SLC22A5	0.774503	4.16862	0.00132829	0.0237295
PPP2CA	1.02618	6.73525	1.1148e-06	7.27036e-05
SPOCK1	0.948894	3.30264	0.00158594	0.0269535
FAM13B	0.677197	3.81954	0.00150107	0.0260275
REEP2	-0.983772	4.04007	0.000719719	0.0147013
EGR1	3.45879	5.09074	1.74491e-08	1.88904e-06
ETF1	0.703635	6.46133	0.000554666	0.0118438
CXXC5	-1.05724	5.64288	6.23581e-07	4.35541e-05
CYSTM1	0.785811	6.90751	0.000207472	0.00551866
HBEGF	3.56733	7.08742	1.37966e-20	2.13374e-17
DIAPH1	1.75863	7.44732	1.09425e-09	1.64532e-07
CSNK1A1	0.896745	6.62177	0.000173614	0.00484418
GPX3	0.91844	7.00651	0.000136027	0.0040126
SLC36A1	0.991511	3.11801	0.00154807	0.0266446
FAXDC2	-1.30456	3.79967	3.03823e-07	2.32822e-05
CPEB4	2.4553	7.78816	1.49153e-14	8.9707e-12
NOP16	0.755879	4.46712	0.000854924	0.0167975
HNRNPAB	0.793392	5.44846	0.000254255	0.00646142
NEDD9	-1.06057	4.72539	0.000852	0.0167975
RNF144B	1.1887	7.45737	3.39677e-06	0.000182952
E2F3	0.711588	3.45567	0.00144228	0.0253476
SOX4	1.4935	3.57688	5.91619e-05	0.00197073
TRIM38	0.918412	3.50736	0.000888314	0.0173277
ZNF204P	-0.97766	2.67085	0.000129612	0.00386549
IER3	1.40402	2.68814	0.000123237	0.00373715
ABHD16A	-0.947646	4.76657	1.06167e-05	0.000463452
HSPA1L	2.41649	4.14403	6.53199e-07	4.53304e-05
HSPA1A	3.70536	9.79489	1.65133e-10	2.9307e-08
HSPA1B	3.69754	9.65621	4.16811e-10	7.16254e-08
EHMT2	-0.796658	3.0395	0.000683444	0.0141202
PPARD	0.87063	5.10388	0.00201603	0.0319087
SRSF3	0.707852	6.1181	0.000374208	0.00869351
CDKN1A	4.48619	5.32413	6.4214e-18	6.95181e-15
PIM1	1.56255	3.97028	0.000331017	0.00794409
BYSL	1.12891	3.55683	2.14292e-05	0.000868886
POLR1C	0.761308	2.70948	0.00230115	0.0350384
POLH	-0.650657	2.78659	0.00253399	0.0376826
VEGFA	0.825755	7.46651	0.000164232	0.00466661
ENPP5	-1.3207	3.83023	2.31932e-05	0.000916384
PHF3	-0.591365	5.22849	0.00351293	0.0484471
SLC17A5	0.820226	3.19176	0.00114029	0.0209944
AKIRIN2	1.28244	5.83547	7.29426e-07	4.96652e-05
MDN1	-0.58307	5.4886	0.0011129	0.0206306
CASP8AP2	-0.807139	3.71868	0.000824158	0.016444
BACH2	1.02756	3.74042	0.000299713	0.00734094
SESN1	-0.685996	7.55874	0.00153538	0.0265103
AMD1	1.25154	5.76197	2.63474e-08	2.69091e-06
SLC16A10	0.901156	5.05402	0.00131318	0.0235763
VGLL2	2.89017	8.10521	5.39669e-20	6.49162e-17
SMPDL3A	0.83109	5.24456	0.000748311	0.0151993
SGK1	1.50557	6.23865	1.11305e-09	1.65066e-07
TNFAIP3	1.37372	3.67128	1.42585e-07	1.2251e-05
CITED2	1.5774	6.05685	5.66711e-06	0.000273893
KATNA1	0.685086	3.85903	0.00194899	0.0311206
SYNE1	0.723181	6.95735	0.00157937	0.0268941
SYNJ2	2.52352	4.12191	2.72199e-09	3.68353e-07
TULP4	0.899541	4.87981	0.00172944	0.0287602
DYNLT1	0.878339	4.90358	4.57674e-05	0.0016081
MAFK	1.50211	5.62376	2.43934e-06	0.000138991
C1GALT1	-0.619971	4.16089	0.000830031	0.0165172
HDAC9	1.29652	5.53738	0.000210366	0.00558191
CDCA7L	-0.933082	1.79876	0.0030397	0.0434139
DFNA5	1.26218	2.18458	0.0001812	0.00501145
HOXA11	-1.49481	2.48341	2.72991e-08	2.76206e-06
WIPF3	1.63241	5.65081	1.04154e-05	0.000460232
KBTBD2	-0.77961	6.39061	0.000694564	0.0142953
STK17A	1.1718	3.79403	1.72669e-05	0.000721743
UPP1	0.885479	2.59805	0.00170845	0.0285868
ZNF273	-1.63265	2.66063	8.61613e-05	0.00271158
AUTS2	2.64002	5.08334	9.89837e-13	3.45676e-10
TBL2	0.998254	3.29284	0.000284172	0.00707229
HSPB1	1.93625	10.0295	5.40043e-09	6.79826e-07
SEMA3C	1.17734	6.04718	2.55252e-07	2.00243e-05
SLC25A40	-0.686918	3.56429	0.000631081	0.0131893
CLDN12	0.667279	5.0871	0.00157093	0.026882
PEG10	2.17443	3.35282	1.26287e-07	1.10257e-05
SMURF1	0.935518	4.35054	0.000143011	0.00419577
AP1S1	-0.808631	2.19085	0.00261646	0.038591
ORAI2	1.08356	1.8646	0.000188474	0.0051313
SRPK2	2.13997	5.20791	1.34882e-08	1.49003e-06
PNPLA8	1.36407	5.98421	3.5608e-07	2.65857e-05
IFRD1	3.05157	7.46175	4.79662e-12	1.33149e-09
LMOD2	0.892862	10.2133	0.00100961	0.0190418
CALU	0.963944	6.68567	7.75924e-05	0.00248525
CCDC136	2.11304	2.83788	2.37463e-07	1.89027e-05
FLNC	2.60601	12.9153	5.74641e-06	0.000276492
SMO	-0.969729	2.29696	0.000369548	0.00862225
STRIP2	1.22267	6.02917	1.96848e-06	0.000115193
FAM131B	-1.03467	2.57968	0.000316276	0.00765996
PRKAG2	2.95448	5.06993	2.56106e-13	1.02689e-10
ANGPT2	1.50812	2.34305	0.00107224	0.0199794
MFHAS1	1.13293	2.41225	0.00132786	0.0237295
CTSB	0.751151	7.43932	0.00106377	0.0198902
VPS37A	0.654597	5.11739	0.00250121	0.0372977
LZTS1	1.05661	2.10816	0.000298516	0.00734094
LOXL2	1.00112	2.69526	0.000602483	0.0127642
NKX3-1	0.89927	2.49275	0.000627825	0.0131722
PPP2CB	1.05604	6.26604	4.44992e-06	0.000224393
BAG4	-0.81721	2.87011	0.00358543	0.0490718
FGFR1	0.909309	5.73564	0.000441838	0.00984225
FAM110B	2.25169	5.15128	5.13182e-15	3.70381e-12
SDCBP	0.663869	5.685	0.000624563	0.0131292
TRIM55	1.46121	5.65299	1.23829e-05	0.000536231
SLCO5A1	1.38308	4.6029	2.82219e-05	0.00107204
ZFHX4	-0.985259	3.63087	8.54578e-06	0.000387099
HEY1	1.04947	3.80271	0.00351122	0.0484471
ZBTB10	0.633935	4.63287	0.00168998	0.0283654
AZIN1	0.819708	6.32436	0.000655464	0.0136463
ABRA	3.26187	9.67495	7.41264e-32	8.02493e-28
ANGPT1	-0.879646	5.03182	0.000256738	0.00650924
MYC	3.74122	4.93173	8.45923e-12	2.12976e-09
AGO2	1.11763	4.40949	0.000133185	0.00394197
MAFA	1.20226	5.17707	8.08931e-05	0.00257573
SCXB	1.04553	2.52375	0.000175046	0.00487158
VLDLR	0.702283	5.91862	0.00152535	0.0263793
KIAA0020	0.774827	2.6455	0.00215379	0.0334053
CDC37L1	1.55547	6.68895	3.68741e-10	6.43869e-08
RCL1	0.717096	4.34637	0.00253362	0.0376826
JAK2	0.987483	5.72747	7.92716e-05	0.00253155
MOB3B	-1.2879	2.99067	5.04611e-07	3.61783e-05
DNAJA1	0.990296	5.15712	2.02171e-07	1.64564e-05
ANXA2P2	1.29318	5.81782	4.45636e-06	0.000224393
DNAJB5	1.23363	7.84252	0.000128739	0.00386074
FAM214B	0.989189	3.72123	0.000824327	0.016444
RUSC2	0.949473	6.24467	0.000205689	0.00548469
SHB	1.57947	3.07574	3.40367e-05	0.00126037
SMC5	1.23058	5.40564	5.52905e-07	3.91225e-05
TMEM2	1.16913	4.13748	7.63418e-06	0.000351692
TLE4	0.929036	5.36633	1.91334e-05	0.000778714
FRMD3	1.97441	7.11099	3.75009e-07	2.78072e-05
UBQLN1	0.694901	7.02162	0.00185403	0.0302286
RMI1	-0.913055	2.14962	0.00187096	0.0303733
GADD45G	-2.437	5.45677	7.1731e-07	4.91493e-05
NFIL3	2.55814	4.49727	2.86481e-12	8.86126e-10
NR4A3	6.03267	7.47303	1.92968e-28	1.04453e-24
ABCA1	-0.956526	4.81582	0.000294131	0.00727805
RALGAPA1P	0.760838	4.37133	0.000299175	0.00734094
TMEM38B	0.742692	7.06352	0.000251271	0.00641569
ZNF462	1.21079	4.60376	4.45726e-05	0.00157694
CTNNAL1	0.862142	5.0626	0.000484165	0.0106105
UGCG	1.4141	3.60065	3.97519e-05	0.00142031
SLC31A2	0.613847	3.78106	0.00342925	0.0475962
RGS3	-1.02868	5.48108	0.000429827	0.00963417
ZNF618	-0.810237	2.46882	0.00227148	0.0347332
TRIM32	-0.749989	4.09193	0.00212363	0.0330321
HSPA5	0.799091	6.61079	9.54048e-05	0.00298512
ZBTB43	1.50016	6.37249	7.11238e-09	8.5554e-07
ANGPTL2	1.3049	6.51985	1.05328e-05	0.000461654
FAM102A	4.15004	5.27608	1.54656e-10	2.83781e-08
TSC1	-0.625934	5.51196	0.00178275	0.0294207
TUBB4B	0.992077	6.36345	6.84213e-05	0.00223111
KLHL34	1.42484	5.5638	0.000502258	0.0109186
ACOT9	0.753618	4.3713	0.000541329	0.0116278
SAT1	0.853026	4.08617	0.0032277	0.0454988
DYNLT3	1.08189	3.56702	6.15687e-06	0.000293631
MID1IP1	-0.717857	6.55224	0.00269301	0.039398
TIMP1	1.19158	3.56377	4.88477e-05	0.00169495
CLCN5	0.978598	3.981	0.00233088	0.0354411
ZXDA	-0.720304	2.96831	0.00263232	0.0387721
AMER1	-1.01777	3.26106	5.11034e-06	0.000251475
MSN	1.15813	6.69851	4.91564e-06	0.000244113
STARD8	1.28135	4.82362	0.000140778	0.00414146
ZMYM3	-0.966508	3.5084	7.62545e-05	0.00246427
PBDC1	0.733539	3.50428	0.00146229	0.0255335
ARMCX1	0.986998	4.83467	6.4664e-06	0.00030704
TSC22D3	-0.836209	6.99012	0.000381533	0.0088258
LONRF3	3.06162	3.80796	4.07985e-14	2.00766e-11
SLC25A5	0.688726	4.34622	0.00142589	0.0251411
ATP1B4	-0.680349	5.79792	0.00162087	0.027418
APLN	1.4863	2.2652	3.93352e-05	0.00141008
TMEM187	-0.845078	1.88119	0.00241735	0.0364488

## Sheet: BL.O vs CON.O
All differentially expressed genes						Up-regulated genes						Down-regulated genes
Gene	logFC	logCPM	PValue	FDR		Gene	logFC	logCPM	PValue	FDR		Gene	logFC	logCPM	PValue	FDR
GLTPD1	-0.780588	5.75241	0.000640347	0.0146321		TNFRSF14	0.816663	3.09396	0.000390787	0.0106191		GLTPD1	-0.780588	5.75241	0.000640347	0.0146321
TNFRSF14	0.816663	3.09396	0.000390787	0.0106191		ENO1	0.631914	6.43733	0.00218892	0.0321767		PER3	-1.19833	5.5702	3.26471e-11	3.071e-08
PER3	-1.19833	5.5702	3.26471e-11	3.071e-08		CLCN6	0.634194	3.98673	0.00132874	0.023341		SPSB1	-1.00893	4.16484	0.000379042	0.0105839
ENO1	0.631914	6.43733	0.00218892	0.0321767		TNFRSF1B	1.27996	4.39126	8.50348e-10	3.69182e-07		MFN2	-0.584691	8.82424	0.00262261	0.0360585
SPSB1	-1.00893	4.16484	0.000379042	0.0105839		FBLIM1	1.12437	1.80809	5.0669e-05	0.00253076		SDHB	-0.610721	7.38331	0.00133975	0.0234466
CLCN6	0.634194	3.98673	0.00132874	0.023341		SPEN	0.570966	5.89672	0.00273591	0.0366717		ALDH4A1	-0.726924	6.96464	0.00041873	0.0111218
MFN2	-0.584691	8.82424	0.00262261	0.0360585		RCC2	0.910806	3.01786	2.46128e-05	0.00149371		MTFR1L	-0.529205	6.85725	0.0027027	0.0365366
TNFRSF1B	1.27996	4.39126	8.50348e-10	3.69182e-07		PQLC2	0.713588	2.91625	0.000543548	0.0131948		EXTL1	-1.51334	4.67651	5.08363e-07	7.08445e-05
FBLIM1	1.12437	1.80809	5.0669e-05	0.00253076		SRSF10	0.849497	5.2667	2.24773e-05	0.00137893		CEP85	-0.599017	6.91174	0.000234119	0.00776329
SPEN	0.570966	5.89672	0.00273591	0.0366717		CLIC4	0.744263	5.79056	2.7233e-05	0.00163179		TESK2	-0.806834	3.12313	0.000386157	0.0106191
SDHB	-0.610721	7.38331	0.00133975	0.0234466		SEPN1	0.594066	5.85477	0.00399631	0.0469645		CYP4B1	-1.18201	2.7048	0.000137709	0.00513022
RCC2	0.910806	3.01786	2.46128e-05	0.00149371		SH3BGRL3	0.88073	3.87375	0.0013203	0.0232532		BEND5	-0.958057	1.60759	0.000381614	0.0105839
ALDH4A1	-0.726924	6.96464	0.00041873	0.0111218		WASF2	0.590847	5.15552	0.00105623	0.0203863		CPT2	-0.620057	4.83977	0.00191428	0.0294703
PQLC2	0.713588	2.91625	0.000543548	0.0131948		TINAGL1	0.597532	5.28464	0.000938699	0.01918		ACADM	-0.857941	7.85843	9.66994e-05	0.00401303
SRSF10	0.849497	5.2667	2.24773e-05	0.00137893		TXLNA	0.616363	4.99535	0.000121584	0.00468409		CASQ2	-0.744015	7.4696	0.00079829	0.0172472
CLIC4	0.744263	5.79056	2.7233e-05	0.00163179		PHC2	0.528324	6.13808	0.00199312	0.0303212		FAM46C	-1.5707	5.19347	1.17699e-14	2.65717e-11
SEPN1	0.594066	5.85477	0.00399631	0.0469645		SFPQ	0.569412	6.50591	0.000956847	0.0192675		C1orf51	-2.98208	3.93959	3.86633e-33	4.36431e-29
MTFR1L	-0.529205	6.85725	0.0027027	0.0365366		INPP5B	0.986296	3.3943	5.81536e-05	0.00277485		LYSMD1	-0.533271	3.43494	0.00412506	0.0479544
EXTL1	-1.51334	4.67651	5.08363e-07	7.08445e-05		KCNQ4	2.45079	4.36255	1.10917e-14	2.65717e-11		PMF1	-0.454037	4.04246	0.00399831	0.0469645
CEP85	-0.599017	6.91174	0.000234119	0.00776329		LEPRE1	0.914383	2.84358	0.0025378	0.0353227		NDUFS2	-0.533401	8.09385	0.00374019	0.0452026
SH3BGRL3	0.88073	3.87375	0.0013203	0.0232532		MAST2	0.620854	8.22885	0.000986761	0.0196059		TOMM40L	-0.564038	4.77699	0.00183901	0.0287818
WASF2	0.590847	5.15552	0.00105623	0.0203863		COA7	0.740072	4.1863	0.000540125	0.0131683		RCSD1	-0.508395	7.62032	0.00231019	0.0333482
TINAGL1	0.597532	5.28464	0.000938699	0.01918		CACHD1	0.834539	2.81798	0.00156105	0.0258907		CEP350	-0.541368	6.3493	0.00280311	0.0373131
TXLNA	0.616363	4.99535	0.000121584	0.00468409		IL12RB2	0.980199	2.26296	0.00375307	0.0453098		COLGALT2	-0.767729	4.04589	0.00398692	0.0469645
PHC2	0.528324	6.13808	0.00199312	0.0303212		GADD45A	1.49195	3.80609	1.09637e-06	0.000130272		DENND1B	-0.521835	4.39297	0.000967863	0.019371
SFPQ	0.569412	6.50591	0.000956847	0.0192675		SRSF11	0.517441	6.00825	0.00350108	0.0431443		BTG2	-1.70378	7.03123	3.94185e-08	8.76703e-06
INPP5B	0.986296	3.3943	5.81536e-05	0.00277485		FUBP1	0.636088	4.91178	0.000656029	0.0148402		SOX13	-0.646624	4.24327	0.000229434	0.0076623
KCNQ4	2.45079	4.36255	1.10917e-14	2.65717e-11		PTGFR	1.42497	2.48351	0.000379149	0.0105839		CDK18	-1.02497	2.16427	0.00379771	0.0457508
LEPRE1	0.914383	2.84358	0.0025378	0.0353227		ELTD1	0.95276	4.14786	5.16873e-06	0.000445793		SLC45A3	-1.83787	3.00056	0.000207164	0.00702244
TESK2	-0.806834	3.12313	0.000386157	0.0106191		CYR61	1.7257	5.4084	0.00270021	0.0365366		SLC41A1	-1.18103	6.46215	9.06974e-11	6.82528e-08
MAST2	0.620854	8.22885	0.000986761	0.0196059		LRRC8B	1.20568	3.1896	0.000143523	0.00522607		RHOU	-0.997002	4.36585	4.19642e-06	0.000382009
CYP4B1	-1.18201	2.7048	0.000137709	0.00513022		PALMD	1.1829	6.93636	1.26072e-07	2.06246e-05		DESI2	-0.531855	4.92279	0.000546043	0.0132269
BEND5	-0.958057	1.60759	0.000381614	0.0105839		VCAM1	1.0554	1.6286	6.80747e-05	0.00307371		CNST	-0.652534	5.46334	0.000139514	0.0051465
COA7	0.740072	4.1863	0.000540125	0.0131683		GPSM2	1.69263	3.74856	0.000471288	0.0120596		PRKCQ	-0.873676	7.31326	5.70104e-08	1.14917e-05
CPT2	-0.620057	4.83977	0.00191428	0.0294703		SORT1	0.867457	7.59942	9.11196e-06	0.000684462		LOC102723721	-1.05828	3.02559	0.00108567	0.0207356
CACHD1	0.834539	2.81798	0.00156105	0.0258907		CSF1	0.72953	3.89872	0.00115302	0.0213365		ATP5C1	-0.588187	7.45199	0.000755263	0.0167246
IL12RB2	0.980199	2.26296	0.00375307	0.0453098		RBM15	0.861431	3.14969	0.000394529	0.0106288		DHTKD1	-0.70128	5.22427	0.00337323	0.042074
GADD45A	1.49195	3.80609	1.09637e-06	0.000130272		CAPZA1	0.614298	4.02273	0.00206513	0.0309167		CDNF	-0.561688	4.04537	0.00203536	0.030661
SRSF11	0.517441	6.00825	0.00350108	0.0431443		NRAS	0.526963	3.52268	0.00222652	0.0326402		PTER	-0.57446	3.57542	0.000878226	0.0183664
ACADM	-0.857941	7.85843	9.66994e-05	0.00401303		ATP1A1	0.707063	5.77949	0.00236773	0.0338744		THNSL1	-0.711709	2.58877	0.00167308	0.0270181
FUBP1	0.636088	4.91178	0.000656029	0.0148402		NBPF8	0.727595	2.9118	0.00255274	0.0353997		MPP7	-0.687782	4.70478	8.7892e-05	0.00374387
PTGFR	1.42497	2.48351	0.000379149	0.0105839		NBPF26	0.68608	3.24144	0.00188286	0.0291947		RET	-0.772919	3.08519	0.00291107	0.0381436
ELTD1	0.95276	4.14786	5.16873e-06	0.000445793		NBPF20	0.68874	3.43209	0.00385245	0.0459678		CSTF2T	-0.544081	5.07484	0.000387348	0.0106191
CYR61	1.7257	5.4084	0.00270021	0.0365366		NBPF10	0.802212	2.91411	0.00277781	0.03702		DNAJC12	-0.872222	1.60999	0.00242633	0.0341927
LRRC8B	1.20568	3.1896	0.000143523	0.00522607		NBPF14	0.717088	3.20215	0.00227347	0.0330708		SGPL1	-0.951922	3.74928	2.2484e-07	3.384e-05
PALMD	1.1829	6.93636	1.26072e-07	2.06246e-05		NBPF9	0.879522	2.22525	0.000489316	0.012329		CPEB3	-0.729953	5.20955	8.96144e-05	0.00378864
VCAM1	1.0554	1.6286	6.80747e-05	0.00307371		NBPF19	0.693849	4.15534	0.00222617	0.0326402		EXOC6	-0.68541	5.46098	9.94873e-05	0.00408368
GPSM2	1.69263	3.74856	0.000471288	0.0120596		PLEKHO1	1.03043	5.67509	0.000388117	0.0106191		PDLIM1	-0.816657	6.85086	0.00163193	0.0266012
SORT1	0.867457	7.59942	9.11196e-06	0.000684462		ECM1	1.19327	3.20905	0.000451881	0.0117531		ANKRD2	-1.65687	7.60924	0.00108086	0.0207143
CSF1	0.72953	3.89872	0.00115302	0.0213365		S100A10	0.914679	5.08673	0.00198549	0.0302459		LDB1	-0.505439	5.55052	0.00225291	0.032814
RBM15	0.861431	3.14969	0.000394529	0.0106288		IL6R	1.59632	5.68066	1.2894e-06	0.000151612		PITX3	-1.72389	3.46582	8.72012e-09	2.98281e-06
CAPZA1	0.614298	4.02273	0.00206513	0.0309167		SHE	0.746019	3.30391	0.00326074	0.0412175		WBP1L	-0.750105	5.486	3.53685e-05	0.00195706
NRAS	0.526963	3.52268	0.00222652	0.0326402		KCNN3	0.941931	4.7667	0.000117597	0.00460916		ZNF511	-0.478723	4.55443	0.00386266	0.0459678
CASQ2	-0.744015	7.4696	0.00079829	0.0172472		ADAM15	0.685327	5.55981	7.98584e-05	0.00350756		SIRT3	-0.525885	4.89835	0.00185913	0.0288664
ATP1A1	0.707063	5.77949	0.00236773	0.0338744		ARHGEF2	0.585875	4.28278	0.00308438	0.0395391		LOC102724536	-0.742943	5.3439	4.26504e-05	0.00227254
FAM46C	-1.5707	5.19347	1.17699e-14	2.65717e-11		LMNA	0.617745	7.36879	0.000704768	0.0157846		ART1	-0.858377	5.3268	0.000419955	0.0111278
NBPF8	0.727595	2.9118	0.00255274	0.0353997		C1orf85	0.721189	2.71912	0.00326831	0.0412209		CHRNA10	-0.734003	5.37787	0.00130605	0.0230715
NBPF26	0.68608	3.24144	0.00188286	0.0291947		IFI16	0.853229	3.85228	0.000496442	0.012453		NAV2	-0.930918	2.88887	0.000263664	0.00830476
NBPF20	0.68874	3.43209	0.00385245	0.0459678		DARC	1.07731	3.40742	0.000988286	0.0196059		SLC43A1	-0.734429	3.68462	0.000606825	0.0141003
NBPF10	0.802212	2.91411	0.00277781	0.03702		TAGLN2	0.684548	5.40899	0.00138033	0.0237519		SAC3D1	-0.580708	3.37522	0.00240887	0.0340893
NBPF14	0.717088	3.20215	0.00227347	0.0330708		UCK2	0.986446	3.63753	4.74512e-05	0.00244579		SLC29A2	-0.515231	6.28194	0.00105652	0.0203863
NBPF9	0.879522	2.22525	0.000489316	0.012329		XPR1	0.593197	3.67273	0.00145358	0.024563		NDUFS8	-0.647067	6.89546	0.00262091	0.0360585
NBPF19	0.693849	4.15534	0.00222617	0.0326402		LAMC1	0.655166	7.01842	0.000513346	0.0127688		ALKBH8	-0.514972	3.34971	0.00330604	0.0415112
PLEKHO1	1.03043	5.67509	0.000388117	0.0106191		HMCN1	0.901418	3.97013	0.00273276	0.0366717		DIXDC1	-1.1419	4.9594	4.92024e-05	0.00247945
C1orf51	-2.98208	3.93959	3.86633e-33	4.36431e-29		CSRP1	0.77648	5.39756	0.000301067	0.00896688		ACAD8	-0.446397	5.21648	0.00204108	0.0306787
ECM1	1.19327	3.20905	0.000451881	0.0117531		TRAF5	0.972154	1.80125	0.00150847	0.0252636		ADIPOR2	-0.52708	6.0401	0.0025047	0.034905
LYSMD1	-0.533271	3.43494	0.00412506	0.0479544		PPP2R5A	0.606701	6.06416	0.000524608	0.0129579		NDUFA9	-0.571957	6.70613	0.00216184	0.0319409
S100A10	0.914679	5.08673	0.00198549	0.0302459		TGFB2	1.51388	4.80451	1.63337e-06	0.00018076		LDHB	-1.09064	6.21123	0.000873152	0.01832
IL6R	1.59632	5.68066	1.2894e-06	0.000151612		MARK1	0.908304	2.11905	0.00184312	0.0287818		MRPS35	-0.484005	5.87833	0.000941565	0.01918
SHE	0.746019	3.30391	0.00326074	0.0412175		ENAH	1.34375	6.7799	2.56456e-06	0.000256184		SLC38A2	-1.32649	7.56081	6.87319e-10	3.38292e-07
KCNN3	0.941931	4.7667	0.000117597	0.00460916		MAP10	0.848771	2.44489	0.00195044	0.0298732		ASB8	-0.533966	7.5083	0.00126039	0.0224979
ADAM15	0.685327	5.55981	7.98584e-05	0.00350756		EDARADD	0.824666	3.90398	0.000253328	0.00814692		MYL6B	-1.28229	8.02224	0.0029837	0.0387396
ARHGEF2	0.585875	4.28278	0.00308438	0.0395391		ADSS	0.768094	2.7341	0.000202413	0.00694478		ATP5B	-0.692328	10.334	0.000263468	0.00830476
LMNA	0.617745	7.36879	0.000704768	0.0157846		HNRNPU-AS1	0.974246	3.82057	0.000170107	0.00607647		LGR5	-1.67082	4.84398	9.08909e-05	0.00382827
PMF1	-0.454037	4.04246	0.00399831	0.0469645		HNRNPU	0.647402	7.52679	0.000342584	0.0097901		C12orf75	-1.62431	3.95768	0.00110645	0.0209206
C1orf85	0.721189	2.71912	0.00326831	0.0412209		PFKP	0.734229	3.18526	0.000559205	0.0134454		MYL2	-1.42599	12.5479	0.00429183	0.0491341
IFI16	0.853229	3.85228	0.000496442	0.012453		FRMD4A	0.683973	3.17373	0.00385694	0.0459678		LOC100131138	-1.90972	5.29906	0.000535844	0.0130922
DARC	1.07731	3.40742	0.000988286	0.0196059		MAP3K8	0.957972	1.92273	0.00150235	0.0251984		VSIG10	-0.823421	4.87023	1.9239e-05	0.00122006
TAGLN2	0.684548	5.40899	0.00138033	0.0237519		NRP1	0.950863	6.15504	1.94217e-05	0.00122476		COQ5	-0.637551	5.23273	4.85637e-05	0.00246931
NDUFS2	-0.533401	8.09385	0.00374019	0.0452026		RHEBP2	0.657866	4.51332	0.00389187	0.0461465		MLEC	-0.733176	7.1718	1.2364e-05	0.000861509
TOMM40L	-0.564038	4.77699	0.00183901	0.0287818		AGAP6	0.782992	2.58009	0.00107446	0.0206268		PXMP2	-0.756388	4.07452	0.00135518	0.0235543
UCK2	0.986446	3.63753	4.74512e-05	0.00244579		ANXA2P3	1.18236	2.35779	4.32292e-05	0.00227254		TSC22D1	-0.611398	7.68011	0.00135952	0.0235543
RCSD1	-0.508395	7.62032	0.00231019	0.0333482		TSPAN15	1.01668	3.85437	5.97462e-06	0.000495894		SUCLA2	-0.614364	7.01978	0.00261092	0.0360294
CEP350	-0.541368	6.3493	0.00280311	0.0373131		GLUD1P3	0.788495	2.17789	0.00281172	0.0373836		KLF12	-0.618523	4.42374	0.00152189	0.0254504
XPR1	0.593197	3.67273	0.00145358	0.024563		PLAU	1.28592	3.20061	3.15731e-05	0.00182997		KLHL33	-0.902635	6.25999	4.73403e-06	0.000420769
LAMC1	0.655166	7.01842	0.000513346	0.0127688		SAMD8	0.638415	5.75323	0.000404192	0.0108116		FITM1	-0.725963	7.37134	0.00133323	0.0233687
COLGALT2	-0.767729	4.04589	0.00398692	0.0469645		ZMIZ1	0.95323	5.63344	3.26334e-05	0.00186043		NFKBIA	-1.2565	5.39518	5.62712e-10	3.02471e-07
HMCN1	0.901418	3.97013	0.00273276	0.0366717		ACTA2	1.02531	6.13124	0.00118697	0.0218216		CTAGE5	-0.802201	5.11595	2.92081e-06	0.000281795
DENND1B	-0.521835	4.39297	0.000967863	0.019371		ANKRD1	3.96418	9.37963	3.63683e-06	0.000340421		FANCM	-0.813622	1.88899	0.00391399	0.0463114
CSRP1	0.77648	5.39756	0.000301067	0.00896688		HECTD2	0.919528	3.71212	0.000815764	0.0174731		SIX1	-0.572132	7.02894	0.00298921	0.0387396
BTG2	-1.70378	7.03123	3.94185e-08	8.76703e-06		BTAF1	0.614867	4.76062	0.00129316	0.0228826		ARG2	-1.3691	4.0943	0.000201503	0.00693466
SOX13	-0.646624	4.24327	0.000229434	0.0076623		MYOF	1.68215	3.84695	5.59085e-06	0.000470966		DPF3	-0.508358	5.10314	0.00329035	0.0413856
CDK18	-1.02497	2.16427	0.00379771	0.0457508		PLCE1	1.2364	3.89309	0.000249323	0.00804104		FAM161B	-0.564805	3.44121	0.0015881	0.02617
SLC45A3	-1.83787	3.00056	0.000207164	0.00702244		TM9SF3	0.42089	5.89773	0.00283077	0.0374604		COQ6	-0.612256	4.87475	0.00163956	0.0266676
SLC41A1	-1.18103	6.46215	9.06974e-11	6.82528e-08		RRP12	0.90417	5.46502	0.00312881	0.0399977		ALDH6A1	-1.03498	5.29445	0.000118262	0.00461917
TRAF5	0.972154	1.80125	0.00150847	0.0252636		LOXL4	1.28501	3.59437	8.63588e-06	0.000663141		STON2	-0.655869	4.09803	0.00356956	0.0436093
PPP2R5A	0.606701	6.06416	0.000524608	0.0129579		PPRC1	0.955394	4.32508	0.00082791	0.0176329		C14orf159	-0.609536	7.09131	0.00163166	0.0266012
TGFB2	1.51388	4.80451	1.63337e-06	0.00018076		NFKB2	0.695302	4.03082	0.000572959	0.0136264		KLF13	-0.944471	6.5425	6.94254e-08	1.35116e-05
MARK1	0.908304	2.11905	0.00184312	0.0287818		ITPRIP	0.611519	3.24166	0.00294929	0.0384873		C15orf41	-0.569017	3.17742	0.0038308	0.0458691
ENAH	1.34375	6.7799	2.56456e-06	0.000256184		RBM20	0.816882	5.41664	7.02205e-05	0.00314543		ADAL	-0.613091	4.577	0.000228549	0.00765539
RHOU	-0.997002	4.36585	4.19642e-06	0.000382009		PDCD4	0.61371	3.53521	0.00121806	0.0221559		RASL12	-0.785766	4.50625	8.89481e-06	0.000673856
MAP10	0.848771	2.44489	0.00195044	0.0298732		NSMCE4A	1.02817	3.33464	1.36237e-08	3.94318e-06		ZNF710	-0.659546	5.20184	0.000513557	0.0127688
EDARADD	0.824666	3.90398	0.000253328	0.00814692		CHST15	1.72544	5.2053	1.22861e-05	0.000861398		HBA2	-1.85599	8.1403	0.00437253	0.0497051
ADSS	0.768094	2.7341	0.000202413	0.00694478		IFITM2	0.72633	4.5842	0.000153285	0.00552806		TMEM204	-0.600712	3.61862	0.00340665	0.0423195
DESI2	-0.531855	4.92279	0.000546043	0.0132269		IFITM3	0.826333	5.52404	5.87443e-05	0.00277485		NDUFB10	-0.552598	7.65437	0.0024175	0.0341475
HNRNPU-AS1	0.974246	3.82057	0.000170107	0.00607647		PDDC1	0.454766	4.36503	0.00341316	0.0423195		SLC9A3R2	-0.585283	5.9584	0.00308593	0.0395391
HNRNPU	0.647402	7.52679	0.000342584	0.0097901		CD151	0.507329	5.95709	0.00399565	0.0469645		ECI1	-0.626558	6.29195	0.00140984	0.0240761
CNST	-0.652534	5.46334	0.000139514	0.0051465		DUSP8	0.994071	4.13927	0.00249755	0.0348916		FLYWCH2	-0.539498	3.60453	0.00191099	0.029469
PFKP	0.734229	3.18526	0.000559205	0.0134454		AMPD3	1.50973	5.01515	2.22544e-06	0.000226949		PAQR4	-0.883473	3.97003	0.000379641	0.0105839
PRKCQ	-0.873676	7.31326	5.70104e-08	1.14917e-05		PARVA	0.832279	4.27773	0.000954609	0.0192675		HCFC1R1	-0.691832	7.20875	0.00304485	0.0392355
LOC102723721	-1.05828	3.02559	0.00108567	0.0207356		ARNTL	1.62589	3.18944	1.50507e-08	4.04504e-06		TMEM159	-0.803364	6.66289	0.00126594	0.0225394
ATP5C1	-0.588187	7.45199	0.000755263	0.0167246		CD44	0.923237	5.03978	0.00137088	0.0236408		UQCRC2	-0.607429	8.67835	0.00119878	0.0219749
DHTKD1	-0.70128	5.22427	0.00337323	0.042074		PAMR1	1.12405	2.15961	0.00406405	0.0473916		SBK1	-0.788218	5.6815	2.81635e-05	0.00166445
FRMD4A	0.683973	3.17373	0.00385694	0.0459678		ACCS	1.13353	1.98517	0.0019163	0.0294703		GPT2	-1.28082	7.89299	9.27725e-05	0.00387858
CDNF	-0.561688	4.04537	0.00203536	0.030661		DGKZ	0.838665	6.56634	4.30733e-05	0.00227254		CNEP1R1	-0.508056	3.63667	0.00238953	0.033971
PTER	-0.57446	3.57542	0.000878226	0.0183664		ARHGAP1	0.52006	4.66658	0.00195895	0.0299394		MT1X	-1.15384	6.50439	0.000282555	0.00864359
THNSL1	-0.711709	2.58877	0.00167308	0.0270181		ACP2	0.513323	3.59475	0.00311129	0.0398189		NFATC3	-0.507478	5.40273	0.00128832	0.0228656
MPP7	-0.687782	4.70478	8.7892e-05	0.00374387		APLNR	1.34672	4.91598	2.78204e-08	6.68162e-06		ABR	-0.637155	4.97454	0.000553273	0.0133733
MAP3K8	0.957972	1.92273	0.00150235	0.0251984		TNKS1BP1	0.591627	5.52492	0.000463789	0.0118983		SLC25A11	-0.563987	7.70042	0.00297192	0.0387379
NRP1	0.950863	6.15504	1.94217e-05	0.00122476		STX3	0.98075	3.2021	4.86365e-06	0.000428913		PER1	-2.72962	6.89586	3.12206e-30	1.76209e-26
RET	-0.772919	3.08519	0.00291107	0.0381436		FADS3	0.955665	4.09254	5.89976e-05	0.00277485		COX10	-0.495883	5.53946	0.00272582	0.0366298
RHEBP2	0.657866	4.51332	0.00389187	0.0461465		EML3	0.893252	3.24464	9.9171e-05	0.00408368		UBB	-0.525426	9.33134	0.00266441	0.036318
AGAP6	0.782992	2.58009	0.00107446	0.0206268		SLC3A2	0.791135	5.12723	5.68916e-06	0.000475698		FOXO3B	-1.36003	4.89813	4.91718e-10	2.92132e-07
CSTF2T	-0.544081	5.07484	0.000387348	0.0106191		ATL3	0.764625	4.08007	0.000863302	0.0181809		C17orf75	-0.648851	3.74309	0.000150084	0.00544742
ANXA2P3	1.18236	2.35779	4.32292e-05	0.00227254		FRMD8	0.88362	3.02686	0.000240477	0.00783417		RASL10B	-1.09789	5.1203	5.99618e-05	0.0028085
DNAJC12	-0.872222	1.60999	0.00242633	0.0341927		NEAT1	0.9958	8.96846	0.00181489	0.0286925		TCAP	-0.729659	12.0132	0.00116117	0.0214172
TSPAN15	1.01668	3.85437	5.97462e-06	0.000495894		MALAT1	1.02346	7.37015	0.00018047	0.00636606		THRA	-0.504254	6.09512	0.000950669	0.0192675
SGPL1	-0.951922	3.74928	2.2484e-07	3.384e-05		CD248	1.27415	4.63967	0.000879233	0.0183664		NR1D1	-1.13256	5.02931	1.44775e-06	0.000163422
GLUD1P3	0.788495	2.17789	0.00281172	0.0373836		CPT1A	0.901594	3.76116	5.80544e-05	0.00277485		MLX	-0.42628	5.58777	0.00341833	0.0423195
PLAU	1.28592	3.20061	3.15731e-05	0.00182997		CTTN	0.615514	5.69027	0.000189459	0.00658036		PNPO	-0.452627	4.80659	0.00283841	0.0375175
SAMD8	0.638415	5.75323	0.000404192	0.0108116		UCP3	0.852102	8.53041	9.88422e-05	0.00408368		ATP5G1	-0.594437	6.11526	0.00355232	0.0434909
ZMIZ1	0.95323	5.63344	3.26334e-05	0.00186043		SERPINH1	0.949343	4.39264	0.00180751	0.0286441		SPOP	-0.424183	5.29756	0.00177721	0.028295
ACTA2	1.02531	6.13124	0.00118697	0.0218216		PRCP	0.655375	4.07251	0.00193526	0.029681		HLF	-1.18063	3.79358	1.54557e-09	6.01598e-07
ANKRD1	3.96418	9.37963	3.63683e-06	0.000340421		CREBZF	0.574777	5.00761	0.00156655	0.0259285		DYNLL2	-0.541482	7.06491	0.000410364	0.0109508
HECTD2	0.919528	3.71212	0.000815764	0.0174731		SYTL2	1.04562	3.23741	9.20665e-05	0.00386337		CA4	-0.962389	2.48573	0.00343347	0.0424501
BTAF1	0.614867	4.76062	0.00129316	0.0228826		TAF1D	0.645266	3.35681	0.00414158	0.0479981		MAP2K6	-0.712178	4.28557	0.000280415	0.00863268
CPEB3	-0.729953	5.20955	8.96144e-05	0.00378864		PANX1	1.26736	6.10753	1.8788e-05	0.00120499		UBALD2	-0.627827	4.6217	0.000259286	0.00827685
EXOC6	-0.68541	5.46098	9.94873e-05	0.00408368		ENDOD1	0.937221	7.4463	2.73995e-06	0.000271303		NOTUM	-1.25769	2.39826	3.71804e-05	0.0020275
MYOF	1.68215	3.84695	5.59085e-06	0.000470966		SESN3	0.703739	4.43508	0.000573398	0.0136264		DCXR	-0.618073	5.39781	0.00416175	0.0481331
PLCE1	1.2364	3.89309	0.000249323	0.00804104		SIK2	1.4079	5.20038	8.25213e-08	1.47857e-05		MYL12A	-1.15188	9.52036	2.12077e-05	0.00132261
PDLIM1	-0.816657	6.85086	0.00163193	0.0266012		PPP2R1B	1.01455	3.81726	3.20761e-05	0.00184366		GNAL	-0.717225	4.22913	0.000488243	0.012329
TM9SF3	0.42089	5.89773	0.00283077	0.0374604		USP28	1.10341	6.95471	0.000757616	0.0167246		AQP4	-1.11029	6.39769	9.95174e-08	1.70205e-05
RRP12	0.90417	5.46502	0.00312881	0.0399977		NNMT	2.22008	4.86407	8.2288e-05	0.00358636		SLC14A1	-1.02256	2.23135	0.000902997	0.0186344
ANKRD2	-1.65687	7.60924	0.00108086	0.0207143		SIK3	0.602378	5.50312	0.000187283	0.00653314		ATP5A1	-0.56426	9.5129	0.00170034	0.02738
LOXL4	1.28501	3.59437	8.63588e-06	0.000663141		PCSK7	0.497492	4.52407	0.00269516	0.0365222		SMAD7	-0.727086	3.57612	0.00108937	0.0207356
LDB1	-0.505439	5.55052	0.00225291	0.032814		CBL	0.72686	2.88995	0.00105217	0.020372		FECH	-0.445834	5.6458	0.00185839	0.0288664
PPRC1	0.955394	4.32508	0.00082791	0.0176329		MCAM	1.00087	5.88664	0.000127777	0.00487281		ALPK2	-0.907778	6.19669	0.00161646	0.0264581
PITX3	-1.72389	3.46582	8.72012e-09	2.98281e-06		THY1	2.03928	4.08058	4.25637e-05	0.00227254		ZADH2	-0.447172	5.91349	0.00365612	0.0444244
NFKB2	0.695302	4.03082	0.000572959	0.0136264		ARHGEF12	0.603354	7.04708	0.000240418	0.00783417		NDUFS7	-0.697208	7.35913	0.00112845	0.0210893
WBP1L	-0.750105	5.486	3.53685e-05	0.00195706		GRAMD1B	0.871753	2.99562	0.00401479	0.0470809		GNG7	-1.08241	2.41624	0.0026614	0.036318
ITPRIP	0.611519	3.24166	0.00294929	0.0384873		ROBO4	0.649656	4.4983	0.00246569	0.0344892		PDE4A	-1.03836	5.27501	5.22407e-06	0.000445793
RBM20	0.816882	5.41664	7.02205e-05	0.00314543		FLI1	0.704051	3.332	0.00240275	0.0340893		PRDX2	-0.504534	7.43487	0.00388259	0.0460848
PDCD4	0.61371	3.53521	0.00121806	0.0221559		VWF	0.640433	7.22924	0.00125749	0.0224953		ARRDC2	-0.967475	6.52124	0.00228796	0.0331879
NSMCE4A	1.02817	3.33464	1.36237e-08	3.94318e-06		VAMP1	1.07818	2.48146	1.95341e-06	0.000206076		PLEKHF1	-1.43166	5.33723	3.42447e-07	4.89309e-05
CHST15	1.72544	5.2053	1.22861e-05	0.000861398		IFFO1	0.894803	4.71308	0.00079984	0.0172472		NUDT19	-0.785737	5.01478	4.44781e-05	0.00230307
ZNF511	-0.478723	4.55443	0.00386266	0.0459678		PTMS	0.638474	5.36105	0.000636261	0.0146321		CEBPG	-0.456166	6.02695	0.00429879	0.0491639
SIRT3	-0.525885	4.89835	0.00185913	0.0288664		C1S	0.707237	6.42207	0.00381155	0.0458198		WDR62	-0.910353	6.60155	0.000914346	0.0187999
IFITM2	0.72633	4.5842	0.000153285	0.00552806		C1R	1.21515	4.85223	3.51908e-05	0.00195682		EIF3K	-0.481411	7.30515	0.00435687	0.0496152
IFITM3	0.826333	5.52404	5.87443e-05	0.00277485		C1R-2	0.967135	5.14087	0.00100648	0.019793		ECH1	-0.630242	8.37966	0.00114668	0.021254
PDDC1	0.454766	4.36503	0.00341316	0.0423195		C1RL	1.05179	2.83996	0.000120907	0.00467486		ZFP36	-1.44812	4.9398	7.75469e-08	1.435e-05
CD151	0.507329	5.95709	0.00399565	0.0469645		CLSTN3	1.16628	2.59972	0.001384	0.0237786		DBP	-1.77233	4.26976	5.20356e-13	8.39112e-10
DUSP8	0.994071	4.13927	0.00249755	0.0348916		RIMKLB	1.05192	4.25703	6.23505e-07	8.37871e-05		BCAT2	-0.479195	4.77526	0.00298752	0.0387396
LOC102724536	-0.742943	5.3439	4.26504e-05	0.00227254		A2M	0.891101	8.08845	0.000671768	0.0151054		NTF4	-0.886321	2.59104	0.000588931	0.0139077
ART1	-0.858377	5.3268	0.000419955	0.0111278		PZP	0.863186	2.81108	0.00352116	0.0433381		KCNA7	-0.813619	6.28124	6.73065e-07	8.73282e-05
CHRNA10	-0.734003	5.37787	0.00130605	0.0230715		CLEC2B	0.843437	3.27846	0.000826982	0.0176329		ETFB	-0.615467	6.11367	0.00050702	0.012662
AMPD3	1.50973	5.01515	2.22544e-06	0.000226949		GABARAPL1	0.688549	6.57371	0.00409022	0.0475984		EFR3B	-0.855705	3.08299	0.000125767	0.00482876
PARVA	0.832279	4.27773	0.000954609	0.0192675		CPNE8	0.941941	1.74901	0.00111826	0.0210032		GALM	-0.611804	3.45084	0.000559828	0.0134454
ARNTL	1.62589	3.18944	1.50507e-08	4.04504e-06		DDN	1.99336	9.10145	0.000541753	0.0131795		SOS1	-0.508439	5.44546	0.00262605	0.0360619
NAV2	-0.930918	2.88887	0.000263664	0.00830476		LIMA1	0.779069	5.18377	0.00077401	0.0169322		MDH1	-0.813505	8.24518	0.000306546	0.0090347
CD44	0.923237	5.03978	0.00137088	0.0236408		SLC11A2	0.61089	4.88447	0.00381861	0.0458454		LGALSL	-1.10265	5.96646	9.71616e-06	0.000716837
PAMR1	1.12405	2.15961	0.00406405	0.0473916		ZNF385A	1.1123	3.44425	0.000861901	0.0181809		FBXO48	-0.809272	1.53751	0.00287043	0.037808
ACCS	1.13353	1.98517	0.0019163	0.0294703		METTL7B	2.01012	2.53939	1.12339e-05	0.000802587		PAIP2B	-0.91582	6.63473	1.21191e-05	0.000855002
DGKZ	0.838665	6.56634	4.30733e-05	0.00227254		CD63	0.81066	7.91385	0.000113061	0.00449378		BOLA3	-0.555003	3.82153	0.00132045	0.0232532
ARHGAP1	0.52006	4.66658	0.00195895	0.0299394		ESYT1	0.821805	6.72592	0.00012093	0.00467486		VAMP5	-0.545301	5.37563	0.00407574	0.0474788
ACP2	0.513323	3.59475	0.00311129	0.0398189		NAB2	1.07193	3.23285	0.00113691	0.0211772		TMEM150A	-0.579013	4.54679	0.00180675	0.0286441
APLNR	1.34672	4.91598	2.78204e-08	6.68162e-06		METTL1	0.821972	1.95716	0.00155438	0.0258788		IMMT	-0.534054	7.2316	0.0017573	0.0280572
TNKS1BP1	0.591627	5.52492	0.000463789	0.0118983		LRIG3	0.685974	2.81935	0.00243577	0.0342027		SMYD1	-0.513022	9.40286	0.00405834	0.0473916
SLC43A1	-0.734429	3.68462	0.000606825	0.0141003		MDM2	0.665982	5.70646	0.000819628	0.0175226		LMAN2L	-0.475021	4.09188	0.00306431	0.0394022
STX3	0.98075	3.2021	4.86365e-06	0.000428913		PHLDA1	1.28458	2.46526	0.000781797	0.0170695		TMEM131	-0.5072	5.98926	0.00203373	0.030661
FADS3	0.955665	4.09254	5.89976e-05	0.00277485		OSBPL8	1.49691	4.87183	2.92511e-14	5.5031e-11		TMEM182	-0.490275	7.23647	0.00356972	0.0436093
EML3	0.893252	3.24464	9.9171e-05	0.00408368		ATP2B1	0.558203	5.24999	0.000500508	0.0125271		NPHP1	-0.542274	4.20314	0.00386039	0.0459678
SLC3A2	0.791135	5.12723	5.68916e-06	0.000475698		LUM	1.07008	5.62943	0.00322274	0.0407829		ZC3H6	-0.468166	4.68156	0.00364682	0.0443591
ATL3	0.764625	4.08007	0.000863302	0.0181809		ELK3	0.671263	3.84978	0.000598024	0.0140189		PTPN4	-0.531509	5.27281	0.000380001	0.0105839
SAC3D1	-0.580708	3.37522	0.00240887	0.0340893		NT5DC3	1.03471	4.01821	6.64735e-05	0.00302562		LRP1B	-1.23471	4.34735	0.00395895	0.0467944
FRMD8	0.88362	3.02686	0.000240477	0.00783417		CRY1	0.881039	3.94792	0.000267963	0.00837886		ITGB6	-0.831052	6.86818	0.000749956	0.0166644
NEAT1	0.9958	8.96846	0.00181489	0.0286925		CORO1C	0.947471	4.89318	9.69899e-06	0.000716837		CCDC141	-1.16155	4.09522	1.17543e-05	0.000834479
MALAT1	1.02346	7.37015	0.00018047	0.00636606		PPTC7	0.843413	7.01902	0.00297838	0.0387396		PPP1R1C	-1.73079	1.66454	0.000517118	0.0128291
CD248	1.27415	4.63967	0.000879233	0.0183664		SH2B3	1.02179	4.40361	6.62399e-07	8.69437e-05		MSTN	-1.02391	3.19897	0.000671319	0.0151054
SLC29A2	-0.515231	6.28194	0.00105652	0.0203863		DDX55	0.705186	2.28879	0.00132958	0.023341		BOLL	-0.72039	1.91428	0.00318963	0.0405914
NDUFS8	-0.647067	6.89546	0.00262091	0.0360585		SLC15A4	0.842244	5.56709	0.00029031	0.00883292		NDUFB3	-0.625223	5.5082	0.000392346	0.0106191
CPT1A	0.901594	3.76116	5.80544e-05	0.00277485		POLE	0.614986	4.55393	0.00217571	0.0320619		NDUFS1	-0.66565	8.10989	0.00156197	0.0258907
CTTN	0.615514	5.69027	0.000189459	0.00658036		SLC7A1	1.01888	2.70862	0.00135912	0.0235543		IKZF2	-1.12473	3.38194	6.33234e-07	8.40934e-05
UCP3	0.852102	8.53041	9.88422e-05	0.00408368		DCLK1	0.964315	3.4887	0.00274787	0.0367077		ASB18	-1.10963	1.54547	0.00373289	0.0451628
SERPINH1	0.949343	4.39264	0.00180751	0.0286441		DACH1	1.60801	2.17158	7.68999e-07	9.86416e-05		NDUFA10	-0.519954	6.91254	0.00201253	0.0305342
PRCP	0.655375	4.07251	0.00193526	0.029681		ABCC4	0.761187	3.47282	0.000759004	0.0167246		DUSP28	-0.579169	4.06005	0.000885822	0.0183875
CREBZF	0.574777	5.00761	0.00156655	0.0259285		UGGT2	1.00629	1.90963	7.48166e-05	0.00331298		FLRT3	-1.02759	2.84453	0.00110632	0.0209206
SYTL2	1.04562	3.23741	9.20665e-05	0.00386337		COL4A1	1.38909	6.71036	7.80156e-10	3.52256e-07		MGME1	-0.539535	3.72769	0.00289755	0.0380763
TAF1D	0.645266	3.35681	0.00414158	0.0479981		COL4A2	1.36776	6.6086	9.99703e-09	3.22419e-06		ACSS1	-0.852039	5.47515	0.000991804	0.0196412
PANX1	1.26736	6.10753	1.8788e-05	0.00120499		LOC101928841	1.94732	7.9187	0.00114604	0.021254		ID1	-1.03382	3.9428	1.43717e-09	5.79384e-07
ENDOD1	0.937221	7.4463	2.73995e-06	0.000271303		TEP1	0.761226	4.49115	0.000391263	0.0106191		ZNF341	-1.02261	2.08397	2.78083e-05	0.00165211
SESN3	0.703739	4.43508	0.000573398	0.0136264		ABHD4	0.580931	4.40537	0.00121889	0.0221559		UQCC1	-0.61379	6.49099	0.000111242	0.00445282
ALKBH8	-0.514972	3.34971	0.00330604	0.0415112		MMP14	1.12327	4.0018	0.00042316	0.0111865		RBL1	-0.760359	4.12071	0.000155768	0.00558193
SIK2	1.4079	5.20038	8.25213e-08	1.47857e-05		ADCY4	0.777103	3.4716	0.00159979	0.0262859		MAFB	-0.768148	4.7421	0.00318441	0.0405707
PPP2R1B	1.01455	3.81726	3.20761e-05	0.00184366		SPTSSA	0.811971	4.38271	0.00014328	0.00522607		JPH2	-0.489979	8.83126	0.00380303	0.0457661
DIXDC1	-1.1419	4.9594	4.92024e-05	0.00247945		BAZ1A	0.631897	3.28559	0.000562948	0.0134916		ZMYND8	-0.658054	3.6742	0.00231322	0.0333482
USP28	1.10341	6.95471	0.000757616	0.0167246		RALGAPA1	0.511454	4.58603	0.00361516	0.0441167		KCNB1	-0.927959	2.78242	0.00341915	0.0423195
NNMT	2.22008	4.86407	8.2288e-05	0.00358636		NID2	0.951511	3.37207	0.000116007	0.00457861		CEBPB	-1.54524	7.04805	6.7613e-12	7.63216e-09
SIK3	0.602378	5.50312	0.000187283	0.00653314		ERO1L	0.823345	3.29024	0.00039323	0.0106191		RBM38	-0.650773	7.95416	0.00145676	0.0245798
PCSK7	0.497492	4.52407	0.00269516	0.0365222		LGALS3	0.576862	5.23752	0.00164719	0.0267207		LOC102724023	-0.625181	6.44369	0.0016173	0.0264581
CBL	0.72686	2.88995	0.00105217	0.020372		RAB15	1.21392	3.76482	0.000153787	0.00552851		ATP5J	-0.536995	6.76167	0.00413851	0.0479981
MCAM	1.00087	5.88664	0.000127777	0.00487281		ACTN1	0.971097	4.42135	1.04893e-05	0.000768851		C21orf33	-0.685858	6.4469	0.000638853	0.0146321
THY1	2.03928	4.08058	4.25637e-05	0.00227254		SRSF5	0.654303	6.23125	0.000534025	0.0130761		DGCR6	-0.63164	5.62969	0.000598609	0.0140189
ARHGEF12	0.603354	7.04708	0.000240418	0.00783417		VASH1	0.810116	3.47467	0.000922037	0.0189235		UQCR10	-0.719461	7.01224	0.000271643	0.00842391
GRAMD1B	0.871753	2.99562	0.00401479	0.0470809		IRF2BPL	0.787514	4.73374	0.000243037	0.00788332		MTMR3	-0.478016	6.35979	0.00213904	0.0316455
ROBO4	0.649656	4.4983	0.00246569	0.0344892		CCDC88C	1.0386	1.74674	0.000184215	0.00647794		IFT27	-0.599378	2.8038	0.0029128	0.0381436
FLI1	0.704051	3.332	0.00240275	0.0340893		INF2	0.88571	4.68632	0.000263092	0.00830476		TST	-0.668192	4.34371	0.0033665	0.0420464
ACAD8	-0.446397	5.21648	0.00204108	0.0306787		CEP170B	0.792564	3.31966	0.00058567	0.0138887		TEF	-1.41304	6.21844	5.47234e-10	3.02471e-07
ADIPOR2	-0.52708	6.0401	0.0025047	0.034905		CYFIP1	0.649536	4.91052	0.000180441	0.00636606		TOB2	-0.96372	6.61998	2.65906e-08	6.52509e-06
NDUFA9	-0.571957	6.70613	0.00216184	0.0319409		GOLGA8A	0.754027	4.27444	0.00320319	0.0406628		ACO2	-0.651912	8.2088	0.00242009	0.0341475
VWF	0.640433	7.22924	0.00125749	0.0224953		TRPM7	1.00465	4.86033	3.11392e-10	2.06764e-07		PPARA	-0.546699	6.59986	0.00197439	0.0301174
VAMP1	1.07818	2.48146	1.95341e-06	0.000206076		MYO5A	0.715595	4.54002	0.00049366	0.0124108		LOC102724770	-0.626254	5.66713	0.000970386	0.0193871
IFFO1	0.894803	4.71308	0.00079984	0.0172472		CCPG1	0.903167	2.30992	0.000104949	0.0042461		LRRN1	-1.39788	3.52736	0.000304663	0.00902633
PTMS	0.638474	5.36105	0.000636261	0.0146321		NEDD4	0.814377	7.72269	0.00232682	0.0335014		PLCL2	-0.593181	5.86669	5.88636e-05	0.00277485
C1S	0.707237	6.42207	0.00381155	0.0458198		MYO1E	0.72388	3.53615	0.000393158	0.0106191		NR1D2	-1.31445	6.67036	2.3832e-15	8.96718e-12
C1R	1.21515	4.85223	3.51908e-05	0.00195682		ANXA2	1.04799	5.70621	1.7657e-05	0.00113893		GPD1L	-0.99843	7.97609	1.04321e-08	3.27103e-06
C1R-2	0.967135	5.14087	0.00100648	0.019793		PPIB	0.848817	3.27442	0.00250137	0.0349017		ACVR2B-AS1	-0.660928	3.12755	0.00160941	0.0264055
C1RL	1.05179	2.83996	0.000120907	0.00467486		PTPLAD1	0.630047	3.1311	0.00129333	0.0228826		ACVR2B	-0.861578	3.82544	6.49096e-06	0.000519645
CLSTN3	1.16628	2.59972	0.001384	0.0237786		CD276	1.23104	3.75553	4.67068e-06	0.000418433		EXOSC7	-0.508755	4.24986	0.00436023	0.0496152
RIMKLB	1.05192	4.25703	6.23505e-07	8.37871e-05		CSPG4	1.67119	5.67815	3.21759e-05	0.00184366		PFKFB4	-0.829073	2.47823	0.000644515	0.0146679
A2M	0.891101	8.08845	0.000671768	0.0151054		DNAJA4	0.900814	7.64658	0.00224265	0.032749		SLC38A3	-1.30733	4.84554	6.26381e-06	0.000512361
PZP	0.863186	2.81108	0.00352116	0.0433381		TMED3	1.31921	2.26925	0.00171273	0.0275011		C3orf18	-0.599161	5.13702	0.000898261	0.0185706
CLEC2B	0.843437	3.27846	0.000826982	0.0176329		ALPK3	1.13493	10.0776	1.37287e-06	0.000159762		DUSP7	-0.918579	4.56759	3.0412e-07	4.45831e-05
GABARAPL1	0.688549	6.57371	0.00409022	0.0475984		PDE8A	0.646254	3.22666	0.00370637	0.0449382		SMIM4	-0.654014	3.32072	0.00301925	0.0389946
LDHB	-1.09064	6.21123	0.000873152	0.01832		LOC102724554	1.04546	4.19952	6.20501e-05	0.00287267		CPOX	-0.547097	3.59059	0.00238721	0.033971
MRPS35	-0.484005	5.87833	0.000941565	0.01918		ABHD2	1.50153	6.07116	2.21599e-07	3.38028e-05		FILIP1L	-0.684763	7.27385	0.0024325	0.0342027
CPNE8	0.941941	1.74901	0.00111826	0.0210032		IQGAP1	0.651113	5.57619	0.000557986	0.0134454		KLF15	-1.55435	5.80126	5.2844e-07	7.27443e-05
SLC38A2	-1.32649	7.56081	6.87319e-10	3.38292e-07		CHD2	0.669483	6.70163	0.00420433	0.048427		EPHB1	-0.657057	2.94543	0.00282914	0.0374604
ASB8	-0.533966	7.5083	0.00126039	0.0224979		RHBDF1	0.629475	4.31191	0.000262762	0.00830476		SKIL	-0.646917	4.63824	0.00145157	0.024563
DDN	1.99336	9.10145	0.000541753	0.0131795		RAB11FIP3	0.521799	6.45534	0.000957569	0.0192675		MCCC1	-0.609603	4.47758	0.00059066	0.0139193
LIMA1	0.779069	5.18377	0.00077401	0.0169322		CAPN15	0.542935	4.44148	0.000444801	0.0116495		LINC00888	-0.683911	3.49634	0.000380884	0.0105839
SLC11A2	0.61089	4.88447	0.00381861	0.0458454		CLCN7	0.522139	5.37762	0.00184188	0.0287818		MAP6D1	-0.84426	4.45781	4.31709e-05	0.00227254
ZNF385A	1.1123	3.44425	0.000861901	0.0181809		MAPK8IP3	0.62068	5.05241	0.00112014	0.0210036		BDH1	-1.08979	4.40417	0.00229081	0.0331879
METTL7B	2.01012	2.53939	1.12339e-05	0.000802587		AMDHD2	0.911661	2.67269	5.55945e-05	0.00270496		GPR125	-0.504676	5.0329	0.00431976	0.0493536
CD63	0.81066	7.91385	0.000113061	0.00449378		TNFRSF12A	3.18761	5.56527	5.21564e-09	1.89917e-06		USP46	-0.667134	4.74383	1.71213e-05	0.00111072
ESYT1	0.821805	6.72592	0.00012093	0.00467486		THOC6	1.18247	3.4091	4.91553e-05	0.00247945		ENAM	-0.68038	2.84169	0.00336729	0.0420464
MYL6B	-1.28229	8.02224	0.0029837	0.0387396		TFAP4	0.903742	2.1825	0.000570427	0.0136217		PLA2G12A	-0.455036	5.40398	0.00352625	0.0433381
ATP5B	-0.692328	10.334	0.000263468	0.00830476		SNN	0.749398	6.2499	6.76471e-05	0.00306667		PITX2	-0.796157	5.45103	0.000604829	0.0141003
NAB2	1.07193	3.23285	0.00113691	0.0211772		NPIPB3	0.928285	4.44363	5.25252e-06	0.000445793		NDUFC1	-0.691389	6.5329	0.000530789	0.0130251
METTL1	0.821972	1.95716	0.00155438	0.0258788		LOC100271836	0.766352	3.62933	0.00369317	0.0448264		GAB1	-1.30473	5.07083	5.34428e-08	1.11715e-05
LRIG3	0.685974	2.81935	0.00243577	0.0342027		NPIPB4	0.909563	4.44952	1.71214e-05	0.00111072		NR3C2	-0.845727	4.71226	1.01266e-07	1.7061e-05
MDM2	0.665982	5.70646	0.000819628	0.0175226		SMG1P1	0.697519	4.0526	0.0042707	0.0490414		ETFDH	-0.585102	6.42545	0.00114653	0.021254
LGR5	-1.67082	4.84398	9.08909e-05	0.00382827		NPIPB5	1.01206	4.69829	1.78208e-06	0.000191582		TENM3	-0.766047	3.33471	0.000332387	0.00957578
PHLDA1	1.28458	2.46526	0.000781797	0.0170695		USP31	0.6597	4.28975	0.00031352	0.00919224		ING2	-0.82109	2.82895	0.000238125	0.00783417
OSBPL8	1.49691	4.87183	2.92511e-14	5.5031e-11		ARHGAP17	0.691787	4.9402	5.02971e-05	0.00252335		SLC25A4	-0.618656	10.1689	0.00234032	0.0336529
ATP2B1	0.558203	5.24999	0.000500508	0.0125271		NPIPB11	0.912832	3.83659	9.15607e-06	0.000684462		SDHA	-0.522088	8.1763	0.00271491	0.0365946
LUM	1.07008	5.62943	0.00322274	0.0407829		MVP	1.13083	5.37032	0.000418744	0.0111218		NNT-AS1	-0.648871	4.83068	0.000743098	0.0165446
ELK3	0.671263	3.84978	0.000598024	0.0140189		LOC613037	0.956066	4.23366	7.68978e-06	0.000608533		NNT	-0.623596	8.67221	0.00184337	0.0287818
NT5DC3	1.03471	4.01821	6.64735e-05	0.00302562		ZNF629	0.539637	4.68181	0.00262109	0.0360585		NDUFS4	-0.554993	6.03417	0.00209769	0.0312385
C12orf75	-1.62431	3.95768	0.00110645	0.0209206		HSD3B7	1.15006	3.44293	8.82694e-05	0.00374581		NLN	-0.4671	5.26862	0.0035415	0.0434054
CRY1	0.881039	3.94792	0.000267963	0.00837886		KIFC3	1.091	3.08398	1.27964e-05	0.000886171		ERBB2IP	-0.43779	6.02663	0.00240897	0.0340893
CORO1C	0.947471	4.89318	9.69899e-06	0.000716837		SLC38A7	0.643705	3.62064	0.000955785	0.0192675		MRPS27	-0.439724	6.14618	0.00153501	0.0255941
PPTC7	0.843413	7.01902	0.00297838	0.0387396		CDH5	0.570037	5.73462	0.00223931	0.0327427		PTCD2	-0.612922	3.55154	0.00203109	0.030661
MYL2	-1.42599	12.5479	0.00429183	0.0491341		RRAD	1.76315	8.0771	0.000151703	0.00548855		GFM2	-0.61624	5.10037	0.000799646	0.0172472
LOC100131138	-1.90972	5.29906	0.000535844	0.0130922		CES2	0.892792	5.8449	0.000908409	0.0187119		CETN3	-0.720522	2.16593	0.00383597	0.0458691
SH2B3	1.02179	4.40361	6.62399e-07	8.69437e-05		CES3	1.55311	4.43793	7.1926e-10	3.38292e-07		NREP	-0.807062	5.99623	0.00125255	0.0224425
VSIG10	-0.823421	4.87023	1.9239e-05	0.00122006		CBFB	0.668768	4.38115	0.000477658	0.0121164		CTXN3	-0.928991	3.00974	0.00165985	0.0268814
COQ5	-0.637551	5.23273	4.85637e-05	0.00246931		PLA2G15	0.767862	5.24933	0.000246754	0.00798097		SLC12A2	-1.01157	5.12451	1.49922e-08	4.04504e-06
MLEC	-0.733176	7.1718	1.2364e-05	0.000861509		SLC7A6	0.996452	5.5732	1.65674e-05	0.00110007		PCBD2	-0.484761	5.20217	0.00209107	0.0311809
DDX55	0.705186	2.28879	0.00132958	0.023341		NFAT5	0.561105	4.76813	0.00106877	0.0205849		NPY6R	-0.934276	3.83165	0.000847768	0.0179542
SLC15A4	0.842244	5.56709	0.00029031	0.00883292		BCAR1	0.665371	5.94937	0.0028156	0.0373911		MYOZ3	-0.576391	8.08851	0.000995549	0.0196464
POLE	0.614986	4.55393	0.00217571	0.0320619		CMIP	1.14432	2.33493	7.95521e-06	0.0006236		ECI2	-0.601752	6.02789	0.00155681	0.0258812
PXMP2	-0.756388	4.07452	0.00135518	0.0235543		PIEZO1	0.858011	3.66731	0.000614612	0.0141876		ALDH5A1	-0.834875	6.43779	5.51522e-05	0.00269506
SLC7A1	1.01888	2.70862	0.00135912	0.0235543		LOC101927793	1.2645	3.53814	0.000834719	0.0177445		MRPS18B	-0.536526	6.68902	0.00113095	0.021101
DCLK1	0.964315	3.4887	0.00274787	0.0367077		FAM101B	0.665368	4.14298	0.000187521	0.00653314		FKBP5	-0.904552	7.65909	0.000326106	0.00948734
TSC22D1	-0.611398	7.68011	0.00135952	0.0235543		WDR81	0.479123	4.69541	0.00302649	0.0390434		TFEB	-0.677408	5.86594	0.000294123	0.00884856
SUCLA2	-0.614364	7.01978	0.00261092	0.0360294		SGSM2	0.550168	5.51697	0.000880248	0.0183664		KLHDC3	-0.666339	8.07276	0.000269452	0.00840214
DACH1	1.60801	2.17158	7.68999e-07	9.86416e-05		MNT	0.799317	3.14298	3.4327e-05	0.00191823		FBXO9	-0.481056	5.64702	0.00319508	0.0406149
KLF12	-0.618523	4.42374	0.00152189	0.0254504		CD68	1.73569	3.39139	4.07851e-06	0.000374295		C6orf203	-0.513975	3.85094	0.00382181	0.0458454
ABCC4	0.761187	3.47282	0.000759004	0.0167246		TP53	0.919961	3.02657	0.000281196	0.00863268		FOXO3	-1.44042	6.37274	4.83772e-12	6.26103e-09
UGGT2	1.00629	1.90963	7.48166e-05	0.00331298		PMP22	0.991347	6.06898	0.00234377	0.0336596		SESN1	-1.09109	7.70124	1.06585e-06	0.000129369
COL4A1	1.38909	6.71036	7.80156e-10	3.52256e-07		FLCN	0.74959	5.21567	7.48414e-05	0.00331298		CEP85L	-0.780338	4.15551	5.76197e-05	0.00277485
COL4A2	1.36776	6.6086	9.99703e-09	3.22419e-06		MAP2K3	0.914195	7.43768	0.00164755	0.0267207		ARHGAP18	-0.94752	3.87581	6.19048e-07	8.37871e-05
LOC101928841	1.94732	7.9187	0.00114604	0.021254		LOC100996792	1.03311	2.21589	0.00121548	0.0221559		C6orf211	-0.443472	4.43264	0.00341248	0.0423195
TEP1	0.761226	4.49115	0.000391263	0.0106191		WSB1	0.85185	5.78261	3.60885e-05	0.00197751		DKFZp451B082	-1.2283	2.39042	0.00111757	0.0210032
KLHL33	-0.902635	6.25999	4.73403e-06	0.000420769		KSR1	0.627968	6.14669	0.00204592	0.0307041		MPC1	-0.591557	6.46509	0.00284493	0.0375598
ABHD4	0.580931	4.40537	0.00121889	0.0221559		LGALS9	1.12512	2.03471	0.000138472	0.00514169		LOC100507642	-1.03679	1.84176	0.00101021	0.0198223
MMP14	1.12327	4.0018	0.00042316	0.0111865		SOCS7	1.45273	5.90156	3.96101e-08	8.76703e-06		ANKMY2	-0.568419	4.332	0.00103121	0.0201042
FITM1	-0.725963	7.37134	0.00133323	0.0233687		RARA	1.1974	4.67731	7.27679e-09	2.56689e-06		CDCA7L	-1.03577	1.79134	5.36469e-05	0.00263289
ADCY4	0.777103	3.4716	0.00159979	0.0262859		IGFBP4	0.975998	5.3061	4.3421e-05	0.00227254		GBAS	-0.543464	9.05717	0.00433327	0.0494579
SPTSSA	0.811971	4.38271	0.00014328	0.00522607		STAT3	0.55434	7.49953	0.00238069	0.033971		WBSCR16	-0.51527	6.62561	0.00300078	0.0388449
BAZ1A	0.631897	3.28559	0.000562948	0.0134916		MAP3K14	1.11918	4.73524	1.05618e-06	0.000129369		TMEM120A	-0.741027	5.27172	0.00111794	0.0210032
NFKBIA	-1.2565	5.39518	5.62712e-10	3.02471e-07		ARHGAP27	0.778123	2.48751	0.00134402	0.0234552		ASB4	-0.617188	5.48903	0.000472213	0.0120596
RALGAPA1	0.511454	4.58603	0.00361516	0.0441167		ITGA3	0.737181	3.55434	0.00135678	0.0235543		ACHE	-0.766114	7.19631	0.000304045	0.00902633
CTAGE5	-0.802201	5.11595	2.92081e-06	0.000281795		COL1A1	3.78095	8.08848	2.22203e-06	0.000226949		DLD	-0.574244	7.72899	0.00315943	0.0403435
FANCM	-0.813622	1.88899	0.00391399	0.0463114		LUC7L3	0.70117	6.09323	0.000477375	0.0121164		NDUFA5	-0.493936	6.90283	0.00288051	0.0378964
NID2	0.951511	3.37207	0.000116007	0.00457861		SPAG9	0.513665	7.18677	0.00353485	0.0433711		LOC102724567	-0.909473	1.69842	0.000333567	0.00957578
ERO1L	0.823345	3.29024	0.00039323	0.0106191		TRIM25	1.00941	4.8644	1.90402e-05	0.00121427		CHCHD3	-0.550277	6.86709	0.00142996	0.0242728
LGALS3	0.576862	5.23752	0.00164719	0.0267207		PECAM1	0.939403	6.48785	2.29406e-06	0.000231209		ANK1	-0.594147	8.87506	0.0029055	0.0381364
SIX1	-0.572132	7.02894	0.00298921	0.0387396		DDX5	0.687234	7.51703	0.000130672	0.00491675		VDAC3	-0.566272	8.24569	0.00184479	0.0287818
RAB15	1.21392	3.76482	0.000153787	0.00552851		LOC146880	0.732161	2.80305	0.00271671	0.0365946		CEBPD	-1.50346	4.4287	1.09768e-08	3.34882e-06
ARG2	-1.3691	4.0943	0.000201503	0.00693466		PLEKHM1P	0.680766	2.34103	0.00292273	0.0381849		C8orf22	-1.27464	7.92047	0.00372673	0.0451366
ACTN1	0.971097	4.42135	1.04893e-05	0.000768851		ABCA5	0.769885	6.49258	0.000942941	0.01918		LOC102724330	-0.681669	2.18883	0.00139062	0.0238562
SRSF5	0.654303	6.23125	0.000534025	0.0130761		MYO15B	0.832799	4.30204	0.000255211	0.00818415		MRPS28	-0.526141	5.10554	0.000608331	0.0141003
DPF3	-0.508358	5.10314	0.00329035	0.0413856		SGSH	0.892568	3.24896	4.38143e-05	0.00227915		DECR1	-0.585986	5.76693	0.00231215	0.0333482
FAM161B	-0.564805	3.44121	0.0015881	0.02617		PPP1R27	1.14026	8.3043	0.000271137	0.00842391		PDP1	-0.859042	5.63406	0.000106908	0.00430993
COQ6	-0.612256	4.87475	0.00163956	0.0266676		ARHGDIA	0.493147	5.74444	0.00363628	0.0442787		ANGPT1	-1.15559	5.04308	1.5824e-06	0.000176852
ALDH6A1	-1.03498	5.29445	0.000118262	0.00461917		FASN	1.22653	4.98838	0.00180929	0.0286441		TRIB1	-0.657163	5.84994	0.00147282	0.0248137
VASH1	0.810116	3.47467	0.000922037	0.0189235		EPB41L3	0.974405	4.17698	0.00112638	0.0210856		ZNF252P	-0.524612	4.93534	0.000606348	0.0141003
IRF2BPL	0.787514	4.73374	0.000243037	0.00788332		LRRC30	0.716246	3.3413	0.00352832	0.0433381		MOB3B	-1.15729	2.94898	0.000104932	0.0042461
STON2	-0.655869	4.09803	0.00356956	0.0436093		CHMP1B	0.767005	6.29069	0.00196006	0.0299394		HINT2	-0.54136	4.33328	0.00244693	0.0343117
C14orf159	-0.609536	7.09131	0.00163166	0.0266012		ESCO1	0.659168	4.29371	7.75403e-05	0.00341904		KLF9	-0.919912	7.31537	1.34091e-07	2.16231e-05
CCDC88C	1.0386	1.74674	0.000184215	0.00647794		ABHD3	0.902525	2.87796	0.0015746	0.0260235		ALDH1A1	-1.05836	5.75924	8.8467e-06	0.000673856
INF2	0.88571	4.68632	0.000263092	0.00830476		RNF125	1.21503	2.46558	3.32537e-05	0.00188627		TLE1	-0.951094	6.05724	9.14003e-09	3.03449e-06
CEP170B	0.792564	3.31966	0.00058567	0.0138887		DSEL	0.98075	2.16059	8.72634e-05	0.00373117		GADD45G	-2.17601	4.74157	1.19787e-07	1.98846e-05
CYFIP1	0.649536	4.91052	0.000180441	0.00636606		SOCS6	0.733797	5.57299	0.00124506	0.02236		TMEM245	-0.470059	6.93759	0.00406228	0.0473916
KLF13	-0.944471	6.5425	6.94254e-08	1.35116e-05		PTBP1	0.55495	4.66146	0.00184572	0.0287818		RGS3	-1.07247	5.17408	0.000205472	0.00700716
GOLGA8A	0.754027	4.27444	0.00320319	0.0406628		DOT1L	0.884929	4.68562	0.00141616	0.0241475		MEGF9	-0.496075	4.19189	0.00327744	0.0412899
C15orf41	-0.569017	3.17742	0.0038308	0.0458691		MFSD12	0.753856	2.94019	0.00329237	0.0413856		MVB12B	-0.739265	5.5457	1.9479e-06	0.000206076
ADAL	-0.613091	4.577	0.000228549	0.00765539		DAPK3	0.603301	5.60177	0.000175053	0.00623342		SLC25A25	-1.23713	5.26277	0.000638517	0.0146321
TRPM7	1.00465	4.86033	3.11392e-10	2.06764e-07		SEMA6B	0.812247	2.95341	0.00080063	0.0172472		FAM78A	-0.85326	6.011	7.84615e-07	9.95139e-05
MYO5A	0.715595	4.54002	0.00049366	0.0124108		C3	0.835789	6.55025	0.00256519	0.0355287		DCAF8L1	-0.698539	1.59095	0.00258582	0.0357706
CCPG1	0.903167	2.30992	0.000104949	0.0042461		ANGPTL4	2.76996	3.43008	2.9705e-07	4.41198e-05		MID1IP1	-1.05663	6.64475	9.03918e-08	1.56976e-05
NEDD4	0.814377	7.72269	0.00232682	0.0335014		ADAMTS10	0.873069	2.41117	0.00282711	0.0374604		MAOB	-0.646764	6.43515	0.00401656	0.0470809
MYO1E	0.72388	3.53615	0.000393158	0.0106191		COL5A3	0.983913	4.54432	6.43517e-06	0.000518859		AMER1	-0.731042	2.91012	0.000784015	0.0170849
ANXA2	1.04799	5.70621	1.7657e-05	0.00113893		CNN1	1.33903	3.42452	0.000425695	0.0112272		MUM1L1	-0.598782	4.2767	0.00340202	0.0423195
PPIB	0.848817	3.27442	0.00250137	0.0349017		LOC284454	0.94576	3.50311	0.000885147	0.0183875		TSC22D3	-0.958833	6.72168	7.35285e-08	1.39424e-05
RASL12	-0.785766	4.50625	8.89481e-06	0.000673856		CD97	0.623074	5.18888	0.000669354	0.0151054		TMEM164	-0.601866	4.85158	0.000998959	0.0196793
PTPLAD1	0.630047	3.1311	0.00129333	0.0228826		TPM4	1.04089	5.40508	1.61742e-05	0.00108032		SLITRK4	-1.40885	3.45733	0.00199619	0.030327
CD276	1.23104	3.75553	4.67068e-06	0.000418433		PLVAP	1.41211	4.46599	1.68676e-05	0.00111072
CSPG4	1.67119	5.67815	3.21759e-05	0.00184366		COLGALT1	0.575999	4.49543	0.0023878	0.033971
DNAJA4	0.900814	7.64658	0.00224265	0.032749		GATAD2A	0.561347	4.39327	0.000185263	0.00649458
TMED3	1.31921	2.26925	0.00171273	0.0275011		ATP13A1	0.552059	3.79614	0.00153238	0.0255881
ALPK3	1.13493	10.0776	1.37287e-06	0.000159762		FXYD5	0.832247	2.66479	0.00115693	0.0213738
PDE8A	0.646254	3.22666	0.00370637	0.0449382		ACTN4	0.67356	5.775	0.000239326	0.00783417
LOC102724554	1.04546	4.19952	6.20501e-05	0.00287267		PLEKHG2	0.825502	2.7147	0.000963693	0.0193218
ABHD2	1.50153	6.07116	2.21599e-07	3.38028e-05		CIC	0.493351	5.42651	0.00184458	0.0287818
ZNF710	-0.659546	5.20184	0.000513557	0.0127688		PVR	1.19454	4.96173	0.00012962	0.0049061
IQGAP1	0.651113	5.57619	0.000557986	0.0134454		BCL3	0.760666	2.61289	0.00267451	0.036318
CHD2	0.669483	6.70163	0.00420433	0.048427		RELB	1.28264	3.01985	8.09611e-06	0.000630268
RHBDF1	0.629475	4.31191	0.000262762	0.00830476		PPP1R13L	0.915957	1.82021	0.00291921	0.0381831
HBA2	-1.85599	8.1403	0.00437253	0.0497051		BBC3	1.12543	2.99387	0.000891211	0.0184587
RAB11FIP3	0.521799	6.45534	0.000957569	0.0192675		EHD2	0.563685	5.65411	0.00344204	0.0425095
CAPN15	0.542935	4.44148	0.000444801	0.0116495		EMP3	1.03193	3.12469	0.00286973	0.037808
CLCN7	0.522139	5.37762	0.00184188	0.0287818		BAX	0.756629	2.36882	0.00212095	0.0314604
TMEM204	-0.600712	3.61862	0.00340665	0.0423195		FTL	0.688636	8.14942	0.000593549	0.0139583
MAPK8IP3	0.62068	5.05241	0.00112014	0.0210036		LENG8	0.668968	6.05434	0.00108305	0.0207212
NDUFB10	-0.552598	7.65437	0.0024175	0.0341475		ZNF274	0.535317	4.03976	0.00243612	0.0342027
SLC9A3R2	-0.585283	5.9584	0.00308593	0.0395391		MZF1	0.625365	3.04498	0.00204821	0.0307041
ECI1	-0.626558	6.29195	0.00140984	0.0240761		PXDN	0.898318	4.1812	0.000942473	0.01918
AMDHD2	0.911661	2.67269	5.55945e-05	0.00270496		YWHAQ	0.596859	5.28451	0.000718617	0.0160629
FLYWCH2	-0.539498	3.60453	0.00191099	0.029469		KLHL29	1.87626	3.42978	5.06883e-09	1.89917e-06
PAQR4	-0.883473	3.97003	0.000379641	0.0105839		ITSN2	0.55591	4.22093	0.00168904	0.0272369
TNFRSF12A	3.18761	5.56527	5.21564e-09	1.89917e-06		TMEM214	0.589749	4.673	0.00139943	0.0239708
HCFC1R1	-0.691832	7.20875	0.00304485	0.0392355		SLC5A6	0.660124	3.32206	0.00185213	0.028837
THOC6	1.18247	3.4091	4.91553e-05	0.00247945		CRIM1	0.900348	6.85292	4.02269e-05	0.00218308
TFAP4	0.903742	2.1825	0.000570427	0.0136217		CYP1B1	1.3139	3.03427	4.34859e-05	0.00227254
SNN	0.749398	6.2499	6.76471e-05	0.00306667		PREPL	0.932196	5.86926	0.000236537	0.0078071
TMEM159	-0.803364	6.66289	0.00126594	0.0225394		EFEMP1	1.22005	5.07123	0.0010482	0.02037
NPIPB3	0.928285	4.44363	5.25252e-06	0.000445793		CNRIP1	0.761595	2.86493	0.0037824	0.0456151
LOC100271836	0.766352	3.62933	0.00369317	0.0448264		AAK1	1.26358	4.38158	1.4405e-06	0.000163422
NPIPB4	0.909563	4.44952	1.71214e-05	0.00111072		CYP26B1	1.60095	2.68403	0.00136876	0.0236408
UQCRC2	-0.607429	8.67835	0.00119878	0.0219749		ACTG2	0.949832	2.32472	0.00254206	0.0353384
SMG1P1	0.697519	4.0526	0.0042707	0.0490414		TMSB10	0.763384	5.41877	0.0011992	0.0219749
NPIPB5	1.01206	4.69829	1.78208e-06	0.000191582		ATOH8	0.767817	4.48908	5.27168e-05	0.00259888
USP31	0.6597	4.28975	0.00031352	0.00919224		EIF2AK3	1.93952	3.3136	3.16127e-05	0.00182997
ARHGAP17	0.691787	4.9402	5.02971e-05	0.00252335		ARID5A	1.30967	5.32903	2.11607e-07	3.27208e-05
SBK1	-0.788218	5.6815	2.81635e-05	0.00166445		IL1R1	1.36288	4.2974	4.99196e-12	6.26103e-09
NPIPB11	0.912832	3.83659	9.15607e-06	0.000684462		LIMS1	0.70794	6.12771	0.000359286	0.0101645
MVP	1.13083	5.37032	0.000418744	0.0111218		LIMS3	0.80611	1.79587	0.00386459	0.0459678
LOC613037	0.956066	4.23366	7.68978e-06	0.000608533		TMEM87B	0.664447	2.46211	0.00320605	0.0406628
ZNF629	0.539637	4.68181	0.00262109	0.0360585		MAP3K2	0.628101	5.17958	2.14448e-05	0.00133005
HSD3B7	1.15006	3.44293	8.82694e-05	0.00374581		RND3	2.09614	4.12932	0.000197427	0.00681516
GPT2	-1.28082	7.89299	9.27725e-05	0.00387858		LOC101929336	1.79696	2.72943	8.96999e-07	0.000112504
CNEP1R1	-0.508056	3.63667	0.00238953	0.033971		FMNL2	0.874378	4.34666	0.000139261	0.0051465
MT1X	-1.15384	6.50439	0.000282555	0.00864359		PKP4	0.588822	4.29466	0.000760075	0.0167246
KIFC3	1.091	3.08398	1.27964e-05	0.000886171		TANC1	1.03231	3.37215	3.39891e-06	0.000325143
SLC38A7	0.643705	3.62064	0.000955785	0.0192675		COBLL1	1.09493	3.11771	2.88819e-05	0.00169802
CDH5	0.570037	5.73462	0.00223931	0.0327427		CHRNA1	1.21784	4.99069	0.00124558	0.02236
RRAD	1.76315	8.0771	0.000151703	0.00548855		COL3A1	2.47511	8.33609	2.21611e-05	0.00136697
CES2	0.892792	5.8449	0.000908409	0.0187119		COL5A2	1.19101	4.8635	0.00123791	0.02236
CES3	1.55311	4.43793	7.1926e-10	3.38292e-07		MYO1B	0.757773	3.81134	0.000457996	0.0118575
CBFB	0.668768	4.38115	0.000477658	0.0121164		NABP1	1.02572	1.63839	0.00170593	0.027431
NFATC3	-0.507478	5.40273	0.00128832	0.0228656		SLC39A10	0.869518	1.95362	0.000993685	0.019644
PLA2G15	0.767862	5.24933	0.000246754	0.00798097		BZW1	0.48611	4.99517	0.00333081	0.0417757
SLC7A6	0.996452	5.5732	1.65674e-05	0.00110007		NOP58	0.733178	4.50866	0.000392988	0.0106191
NFAT5	0.561105	4.76813	0.00106877	0.0205849		IGFBP2	0.86469	3.09705	0.000259568	0.00827685
BCAR1	0.665371	5.94937	0.0028156	0.0373911		RQCD1	0.487852	4.64986	0.00211226	0.031414
CMIP	1.14432	2.33493	7.95521e-06	0.0006236		ACSL3	0.843742	5.92229	6.16146e-05	0.00287267
PIEZO1	0.858011	3.66731	0.000614612	0.0141876		WDFY1	0.696977	4.56138	0.000462524	0.0118929
LOC101927793	1.2645	3.53814	0.000834719	0.0177445		COL4A3	0.995242	5.39674	7.43985e-05	0.00331298
FAM101B	0.665368	4.14298	0.000187521	0.00653314		CHRND	1.57981	6.65493	0.000725775	0.0161908
ABR	-0.637155	4.97454	0.000553273	0.0133733		DGKD	1.49226	7.26903	5.36815e-11	4.32826e-08
WDR81	0.479123	4.69541	0.00302649	0.0390434		SNED1	0.628763	4.81282	0.00398792	0.0469645
SGSM2	0.550168	5.51697	0.000880248	0.0183664		SRXN1	0.805095	4.38142	0.000696248	0.0156247
MNT	0.799317	3.14298	3.4327e-05	0.00191823		PRNP	0.544295	5.84806	0.00383501	0.0458691
SLC25A11	-0.563987	7.70042	0.00297192	0.0387379		CDS2	0.754611	5.23634	5.7326e-05	0.00277485
CD68	1.73569	3.39139	4.07851e-06	0.000374295		RRBP1	0.779898	4.39518	0.00109115	0.0207356
TP53	0.919961	3.02657	0.000281196	0.00863268		NANP	0.861678	1.96234	0.00208918	0.0311809
PER1	-2.72962	6.89586	3.12206e-30	1.76209e-26		DLGAP4	0.741312	7.19888	0.000398709	0.0106903
COX10	-0.495883	5.53946	0.00272582	0.0366298		PPP1R16B	1.17646	3.38439	7.41092e-08	1.39424e-05
PMP22	0.991347	6.06898	0.00234377	0.0336596		SRSF6	0.562313	5.64359	0.00267688	0.036318
UBB	-0.525426	9.33134	0.00266441	0.036318		SDC4	1.08537	6.09943	0.0029869	0.0387396
FLCN	0.74959	5.21567	7.48414e-05	0.00331298		PLTP	0.991615	3.69908	6.57785e-05	0.00301138
FOXO3B	-1.36003	4.89813	4.91718e-10	2.92132e-07		LAMA5	1.05078	5.01724	1.4027e-06	0.000161568
MAP2K3	0.914195	7.43768	0.00164755	0.0267207		LOC102724428	2.72791	3.43134	3.64909e-06	0.000340421
LOC100996792	1.03311	2.21589	0.00121548	0.0221559		RUNX1	2.97116	3.94148	4.98389e-11	4.32755e-08
WSB1	0.85185	5.78261	3.60885e-05	0.00197751		ETS2	0.920026	5.91285	0.000204141	0.00698286
KSR1	0.627968	6.14669	0.00204592	0.0307041		SLC37A1	0.840555	3.49531	0.000126713	0.00484859
LGALS9	1.12512	2.03471	0.000138472	0.00514169		SIK1	2.83462	3.29819	4.5828e-06	0.000413845
C17orf75	-0.648851	3.74309	0.000150084	0.00544742		COL18A1	0.780307	5.83163	0.000234522	0.00776329
RASL10B	-1.09789	5.1203	5.99618e-05	0.0028085		COL6A1	0.774475	7.49252	0.00307562	0.0394967
SOCS7	1.45273	5.90156	3.96101e-08	8.76703e-06		PCNT	0.990014	8.16997	4.8152e-05	0.00245946
TCAP	-0.729659	12.0132	0.00116117	0.0214172		SLC25A1	0.977473	2.63394	0.000120526	0.00467486
THRA	-0.504254	6.09512	0.000950669	0.0192675		CLDN5	0.894587	4.58733	0.00028736	0.00876682
NR1D1	-1.13256	5.02931	1.44775e-06	0.000163422		ARVCF	0.810524	4.93866	0.000793173	0.017218
RARA	1.1974	4.67731	7.27679e-09	2.56689e-06		TANGO2	0.730675	4.36203	0.000886144	0.0183875
IGFBP4	0.975998	5.3061	4.3421e-05	0.00227254		GGT5	1.04335	2.96744	8.64758e-05	0.00372572
STAT3	0.55434	7.49953	0.00238069	0.033971		KIAA1671	0.746367	6.19041	0.00184602	0.0287818
MLX	-0.42628	5.58777	0.00341833	0.0423195		HPS4	0.565975	3.73906	0.0012425	0.02236
MAP3K14	1.11918	4.73524	1.05618e-06	0.000129369		TCN2	0.902616	2.34565	0.00105014	0.02037
ARHGAP27	0.778123	2.48751	0.00134402	0.0234552		HMOX1	1.82543	4.35311	0.000178869	0.00634928
PNPO	-0.452627	4.80659	0.00283841	0.0375175		RBFOX2	0.457935	7.04701	0.00415758	0.0481331
ATP5G1	-0.594437	6.11526	0.00355232	0.0434909		MYH9	0.810927	7.32564	6.55657e-05	0.00301138
SPOP	-0.424183	5.29756	0.00177721	0.028295		MAFF	3.47766	4.3168	1.0062e-06	0.000124813
ITGA3	0.737181	3.55434	0.00135678	0.0235543		TMEM184B	0.519685	5.03932	0.00111231	0.0209963
COL1A1	3.78095	8.08848	2.22203e-06	0.000226949		DDX17	0.625219	7.79882	0.00105026	0.02037
LUC7L3	0.70117	6.09323	0.000477375	0.0121164		RPL3	0.82122	6.95261	0.000807116	0.0173538
SPAG9	0.513665	7.18677	0.00353485	0.0433711		MGAT3	1.00262	1.98048	0.00121391	0.0221559
HLF	-1.18063	3.79358	1.54557e-09	6.01598e-07		FAM118A	0.607068	4.07169	0.0021892	0.0321767
TRIM25	1.00941	4.8644	1.90402e-05	0.00121427		GRAMD4	0.658901	4.31454	5.27235e-05	0.00259888
DYNLL2	-0.541482	7.06491	0.000410364	0.0109508		CERK	0.707214	4.64495	1.55513e-05	0.00105116
CA4	-0.962389	2.48573	0.00343347	0.0424501		PLXNB2	0.820619	4.44649	0.00118328	0.0217894
PECAM1	0.939403	6.48785	2.29406e-06	0.000231209		TYMP	0.912377	2.89172	0.00254785	0.0353753
DDX5	0.687234	7.51703	0.000130672	0.00491675		ARSA	0.646453	3.07382	0.00417185	0.0482005
LOC146880	0.732161	2.80305	0.00271671	0.0365946		TMEM43	0.769514	5.79654	0.00044859	0.0116944
PLEKHM1P	0.680766	2.34103	0.00292273	0.0381849		FGD5	0.761902	3.93158	0.000297077	0.00887676
ABCA5	0.769885	6.49258	0.000942941	0.01918		SH3BP5	1.92719	3.57425	7.89973e-08	1.43826e-05
MAP2K6	-0.712178	4.28557	0.000280415	0.00863268		ANKRD28	0.631794	6.40914	0.00245761	0.0344188
MYO15B	0.832799	4.30204	0.000255211	0.00818415		TGFBR2	0.677435	6.08882	0.00225261	0.032814
UBALD2	-0.627827	4.6217	0.000259286	0.00827685		XIRP1	3.34343	11.2076	4.9077e-08	1.06535e-05
SGSH	0.892568	3.24896	4.38143e-05	0.00227915		KLHL40	2.03188	9.55483	4.78068e-05	0.00245292
PPP1R27	1.14026	8.3043	0.000271137	0.00842391		KIF9	1.03618	1.8285	0.00301281	0.038956
ARHGDIA	0.493147	5.74444	0.00363628	0.0442787		STAB1	1.31698	4.62374	6.58939e-05	0.00301138
NOTUM	-1.25769	2.39826	3.71804e-05	0.0020275		ITIH4	0.955692	6.59818	6.92073e-05	0.0031124
DCXR	-0.618073	5.39781	0.00416175	0.0481331		TKT	1.13047	3.50259	8.70702e-05	0.00373117
FASN	1.22653	4.98838	0.00180929	0.0286441		FLNB	1.28797	5.44743	6.11806e-08	1.21159e-05
MYL12A	-1.15188	9.52036	2.12077e-05	0.00132261		PTPRG	0.572116	4.59782	0.00110381	0.0209206
EPB41L3	0.974405	4.17698	0.00112638	0.0210856		EOGT	0.651149	4.05817	0.00081282	0.0174432
LRRC30	0.716246	3.3413	0.00352832	0.0433381		VGLL3	1.0969	3.04761	0.00211893	0.0314604
GNAL	-0.717225	4.22913	0.000488243	0.012329		PHLDB2	1.00025	3.25558	5.87182e-05	0.00277485
CHMP1B	0.767005	6.29069	0.00196006	0.0299394		LOC100506621	1.50338	3.83707	1.44288e-05	0.000987108
ESCO1	0.659168	4.29371	7.75403e-05	0.00341904		CCDC80	1.47942	5.20863	3.39657e-05	0.00190748
ABHD3	0.902525	2.87796	0.0015746	0.0260235		FSTL1	1.21965	7.03137	0.00334855	0.0419051
AQP4	-1.11029	6.39769	9.95174e-08	1.70205e-05		KPNA1	0.585586	7.47987	0.00126162	0.0224979
RNF125	1.21503	2.46558	3.32537e-05	0.00188627		CCDC14	0.815052	3.19357	0.00094303	0.01918
SLC14A1	-1.02256	2.23135	0.000902997	0.0186344		SEC61A1	0.71175	6.3342	0.000131595	0.00493503
ATP5A1	-0.56426	9.5129	0.00170034	0.02738		PLXND1	0.623718	5.12167	0.00363036	0.0442543
SMAD7	-0.727086	3.57612	0.00108937	0.0207356		SRPRB	0.552744	4.02813	0.000790695	0.0171972
FECH	-0.445834	5.6458	0.00185839	0.0288664		PIK3CB	0.825383	5.63607	8.50563e-05	0.0036786
ALPK2	-0.907778	6.19669	0.00161646	0.0264581		ATP1B3	0.648461	3.7717	0.000281434	0.00863268
DSEL	0.98075	2.16059	8.72634e-05	0.00373117		PLSCR4	0.878059	3.23034	0.00124527	0.02236
SOCS6	0.733797	5.57299	0.00124506	0.02236		HPS3	0.732685	2.10265	0.00180704	0.0286441
ZADH2	-0.447172	5.91349	0.00365612	0.0444244		TM4SF18	0.874293	3.03169	0.000475754	0.0121164
PTBP1	0.55495	4.66146	0.00184572	0.0287818		TM4SF1	0.627216	5.35844	0.000957553	0.0192675
NDUFS7	-0.697208	7.35913	0.00112845	0.0210893		MECOM	0.722848	2.58233	0.00274193	0.0366717
DOT1L	0.884929	4.68562	0.00141616	0.0241475		FNDC3B	1.08054	5.37536	7.70909e-06	0.000608533
GNG7	-1.08241	2.41624	0.0026614	0.036318		ATP11B	0.49127	4.58296	0.00120941	0.0221262
MFSD12	0.753856	2.94019	0.00329237	0.0413856		MCF2L2	1.40891	3.37976	9.51025e-05	0.00396132
DAPK3	0.603301	5.60177	0.000175053	0.00623342		CHRD	0.716203	2.86837	0.00137178	0.0236408
SEMA6B	0.812247	2.95341	0.00080063	0.0172472		ETV5	0.971689	2.74279	0.00260257	0.0359581
C3	0.835789	6.55025	0.00256519	0.0355287		LPP	0.531183	5.66844	0.00424509	0.0487974
ANGPTL4	2.76996	3.43008	2.9705e-07	4.41198e-05		TP63	0.899242	5.31401	0.000293881	0.00884856
ADAMTS10	0.873069	2.41117	0.00282711	0.0374604		ATP13A3	0.516301	4.56814	0.00420395	0.048427
COL5A3	0.983913	4.54432	6.43517e-06	0.000518859		KIAA0226	0.920102	4.13589	1.7574e-06	0.00019133
PDE4A	-1.03836	5.27501	5.22407e-06	0.000445793		GAK	0.520163	4.35787	0.00213745	0.0316455
CNN1	1.33903	3.42452	0.000425695	0.0112272		DOK7	0.673169	4.56707	0.00163312	0.0266012
PRDX2	-0.504534	7.43487	0.00388259	0.0460848		AFAP1	0.824806	2.70817	0.0040362	0.0472131
LOC284454	0.94576	3.50311	0.000885147	0.0183875		WDR1	0.55036	6.96676	0.00334448	0.0419007
CD97	0.623074	5.18888	0.000669354	0.0151054		PPARGC1A	3.00937	7.96273	3.45051e-08	8.11444e-06
TPM4	1.04089	5.40508	1.61742e-05	0.00108032		PI4K2B	0.930524	2.04523	0.000117357	0.00460916
PLVAP	1.41211	4.46599	1.68676e-05	0.00111072		KDR	0.937886	3.85711	0.00184603	0.0287818
COLGALT1	0.575999	4.49543	0.0023878	0.033971		TMEM165	0.683753	3.56001	0.000980367	0.0195519
ARRDC2	-0.967475	6.52124	0.00228796	0.0331879		IGFBP7	0.763716	7.02358	0.000294743	0.00884856
GATAD2A	0.561347	4.39327	0.000185263	0.00649458		RUFY3	0.555162	5.01473	0.00413313	0.0479981
ATP13A1	0.552059	3.79614	0.00153238	0.0255881		FAM175A	0.62394	3.78088	0.00235747	0.0337705
PLEKHF1	-1.43166	5.33723	3.42447e-07	4.89309e-05		AGPAT9	1.01534	5.49642	0.000527186	0.0129649
NUDT19	-0.785737	5.01478	4.44781e-05	0.00230307		NAP1L5	0.834027	1.56785	0.00176864	0.0281983
CEBPG	-0.456166	6.02695	0.00429879	0.0491639		EMCN	0.685471	4.43463	0.000588029	0.0139077
FXYD5	0.832247	2.66479	0.00115693	0.0213738		SGMS2	1.44267	3.20229	2.73217e-05	0.00163179
WDR62	-0.910353	6.60155	0.000914346	0.0187999		C4orf32	0.657232	3.87989	0.00229328	0.0331879
EIF3K	-0.481411	7.30515	0.00435687	0.0496152		ANKRD50	0.605914	2.59436	0.00277306	0.0370003
ACTN4	0.67356	5.775	0.000239326	0.00783417		ANXA2P1	1.059	2.45291	0.000447075	0.0116819
ECH1	-0.630242	8.37966	0.00114668	0.021254		GUCY1B3	0.781728	2.65258	0.000442132	0.0116065
ZFP36	-1.44812	4.9398	7.75469e-08	1.435e-05		FNIP2	1.94164	5.87358	1.52632e-05	0.0010379
PLEKHG2	0.825502	2.7147	0.000963693	0.0193218		ASB5	2.34715	9.99052	1.24964e-08	3.7121e-06
CIC	0.493351	5.42651	0.00184458	0.0287818		STOX2	1.03486	2.47348	0.000206918	0.00702244
PVR	1.19454	4.96173	0.00012962	0.0049061		FAM134B	0.913242	8.03873	0.000327003	0.00948898
BCL3	0.760666	2.61289	0.00267451	0.036318		MYO10	0.62983	4.0501	0.00428527	0.0491341
RELB	1.28264	3.01985	8.09611e-06	0.000630268		OSMR	1.28044	3.15804	4.05978e-05	0.00219267
PPP1R13L	0.915957	1.82021	0.00291921	0.0381831		RICTOR	0.890651	5.63281	6.20953e-05	0.00287267
BBC3	1.12543	2.99387	0.000891211	0.0184587		DAB2	0.87456	4.1574	0.00182702	0.0287818
EHD2	0.563685	5.65411	0.00344204	0.0425095		ITGA1	0.748271	4.05448	0.00173522	0.0277833
EMP3	1.03193	3.12469	0.00286973	0.037808		FST	1.25903	2.5286	0.00263761	0.0360889
DBP	-1.77233	4.26976	5.20356e-13	8.39112e-10		PPAP2A	0.806316	5.41404	3.20091e-07	4.63229e-05
BCAT2	-0.479195	4.77526	0.00298752	0.0387396		PDE4D	1.40358	7.62188	1.64708e-07	2.58225e-05
BAX	0.756629	2.36882	0.00212095	0.0314604		SREK1	0.560112	4.90967	0.00143685	0.0243531
FTL	0.688636	8.14942	0.000593549	0.0139583		MAST4	1.86781	5.03597	1.42141e-10	1.0028e-07
NTF4	-0.886321	2.59104	0.000588931	0.0139077		LHFPL2	0.927864	2.8552	0.00267002	0.036318
KCNA7	-0.813619	6.28124	6.73065e-07	8.73282e-05		VCAN	1.64809	4.74566	0.000228351	0.00765539
ETFB	-0.615467	6.11367	0.00050702	0.012662		MCTP1	1.08379	1.84992	0.00038565	0.0106191
LENG8	0.668968	6.05434	0.00108305	0.0207212		CAST	0.595439	8.15431	0.00263047	0.0360786
ZNF274	0.535317	4.03976	0.00243612	0.0342027		LOX	2.08685	2.72206	0.000525831	0.0129598
MZF1	0.625365	3.04498	0.00204821	0.0307041		ZNF608	1.16515	2.72759	1.08459e-06	0.000130243
PXDN	0.898318	4.1812	0.000942473	0.01918		SEC24A	0.725712	3.90051	0.000293733	0.00884856
YWHAQ	0.596859	5.28451	0.000718617	0.0160629		EGR1	1.29647	3.70466	0.000770457	0.0169201
KLHL29	1.87626	3.42978	5.06883e-09	1.89917e-06		ECSCR	0.931697	1.84339	0.000759027	0.0167246
ITSN2	0.55591	4.22093	0.00168904	0.0272369		TMEM173	0.791805	3.50131	0.000570787	0.0136217
EFR3B	-0.855705	3.08299	0.000125767	0.00482876		HBEGF	1.41593	5.70384	0.00348459	0.042988
TMEM214	0.589749	4.673	0.00139943	0.0239708		DIAPH1	1.18625	6.87051	5.00621e-07	7.06376e-05
SLC5A6	0.660124	3.32206	0.00185213	0.028837		PPARGC1B	1.29544	3.99957	1.63988e-08	4.30489e-06
CRIM1	0.900348	6.85292	4.02269e-05	0.00218308		GPX3	0.70614	7.33196	0.0023507	0.0337163
CYP1B1	1.3139	3.03427	4.34859e-05	0.00227254		SLC36A1	1.53434	3.306	3.38012e-10	2.11971e-07
GALM	-0.611804	3.45084	0.000559828	0.0134454		SPARC	1.15215	8.33263	0.000214212	0.00721798
SOS1	-0.508439	5.44546	0.00262605	0.0360619		SH3PXD2B	1.13203	2.63938	0.000646844	0.0146913
PREPL	0.932196	5.86926	0.000236537	0.0078071		NEURL1B	0.672375	4.78875	0.000328753	0.00951528
EFEMP1	1.22005	5.07123	0.0010482	0.02037		CPEB4	1.15374	7.1714	0.000461123	0.0118929
MDH1	-0.813505	8.24518	0.000306546	0.0090347		PHYKPL	0.633415	4.43069	0.000240827	0.00783417
LGALSL	-1.10265	5.96646	9.71616e-06	0.000716837		ADAMTS2	2.19988	3.25768	3.56628e-05	0.00196371
CNRIP1	0.761595	2.86493	0.0037824	0.0456151		TRIM52	0.868154	1.90007	0.00108952	0.0207356
FBXO48	-0.809272	1.53751	0.00287043	0.037808		SOX4	1.37351	3.24021	7.15327e-10	3.38292e-07
AAK1	1.26358	4.38158	1.4405e-06	0.000163422		CMAHP	1.27462	1.74398	1.69833e-05	0.00111072
PAIP2B	-0.91582	6.63473	1.21191e-05	0.000855002		TRIM38	1.13835	3.48549	8.27849e-06	0.000640052
CYP26B1	1.60095	2.68403	0.00136876	0.0236408		PPP1R18	0.943638	3.38917	0.000101216	0.0041396
ACTG2	0.949832	2.32472	0.00254206	0.0353384		CLIC1	0.846507	3.93376	0.00123496	0.02236
BOLA3	-0.555003	3.82153	0.00132045	0.0232532		CFB	1.18289	2.11522	0.00142778	0.0242723
TMSB10	0.763384	5.41877	0.0011992	0.0219749		ZBTB9	0.975402	1.8539	0.00175583	0.0280572
VAMP5	-0.545301	5.37563	0.00407574	0.0474788		CDKN1A	3.0538	6.27498	5.523e-08	1.13352e-05
TMEM150A	-0.579013	4.54679	0.00180675	0.0286441		TMEM63B	0.482786	5.21855	0.00429052	0.0491341
ATOH8	0.767817	4.48908	5.27168e-05	0.00259888		TRAM2	0.966264	3.41073	5.19469e-05	0.00258316
IMMT	-0.534054	7.2316	0.0017573	0.0280572		SLC17A5	0.736339	2.83677	0.000351938	0.0099816
SMYD1	-0.513022	9.40286	0.00405834	0.0473916		CD109	1.17899	2.85728	0.00029204	0.00884856
EIF2AK3	1.93952	3.3136	3.16127e-05	0.00182997		UBE2J1	0.499902	4.37303	0.0015007	0.0251984
ARID5A	1.30967	5.32903	2.11607e-07	3.27208e-05		BACH2	0.952577	3.6247	3.81473e-06	0.000352956
LMAN2L	-0.475021	4.09188	0.00306431	0.0394022		LAMA4	1.04818	4.92053	0.000129954	0.0049061
TMEM131	-0.5072	5.98926	0.00203373	0.030661		FAM26E	0.686338	2.5351	0.00142696	0.0242723
IL1R1	1.36288	4.2974	4.99196e-12	6.26103e-09		VGLL2	1.94108	8.05677	3.24527e-11	3.071e-08
TMEM182	-0.490275	7.23647	0.00356972	0.0436093		GJA1	0.850343	3.46877	0.000611302	0.0141401
LIMS1	0.70794	6.12771	0.000359286	0.0101645		NCOA7	1.13784	3.06225	2.20565e-08	5.53276e-06
LIMS3	0.80611	1.79587	0.00386459	0.0459678		SGK1	1.47518	5.83522	2.23169e-06	0.000226949
NPHP1	-0.542274	4.20314	0.00386039	0.0459678		PDE7B	0.566547	3.13983	0.00388073	0.0460848
TMEM87B	0.664447	2.46211	0.00320605	0.0406628		TNFAIP3	1.1418	3.59906	2.18389e-06	0.000226949
ZC3H6	-0.468166	4.68156	0.00364682	0.0443591		CITED2	0.902811	6.01212	0.000264122	0.00830476
PTPN4	-0.531509	5.27281	0.000380001	0.0105839		SYNE1	0.879492	7.1443	0.000109507	0.004399
MAP3K2	0.628101	5.17958	2.14448e-05	0.00133005		TIAM2	2.51237	2.89158	5.06977e-08	1.07977e-05
LRP1B	-1.23471	4.34735	0.00395895	0.0467944		SYNJ2	1.36079	3.75745	2.36821e-05	0.00144499
RND3	2.09614	4.12932	0.000197427	0.00681516		TULP4	0.801176	5.199	0.000641886	0.0146376
LOC101929336	1.79696	2.72943	8.96999e-07	0.000112504		DYNLT1	0.659638	4.30527	0.00306477	0.0394022
FMNL2	0.874378	4.34666	0.000139261	0.0051465		MAFK	0.721708	5.49118	0.00148357	0.0249576
PKP4	0.588822	4.29466	0.000760075	0.0167246		AP5Z1	0.590796	3.35876	0.00171754	0.0275391
TANC1	1.03231	3.37215	3.39891e-06	0.000325143		TSPAN13	0.919299	2.79277	0.000113847	0.00450913
ITGB6	-0.831052	6.86818	0.000749956	0.0166644		JAZF1	0.650331	2.69705	0.00435296	0.0496152
COBLL1	1.09493	3.11771	2.88819e-05	0.00169802		WIPF3	0.902679	5.53158	0.00101148	0.0198223
CHRNA1	1.21784	4.99069	0.00124558	0.02236		STK17A	0.810044	3.39413	0.000322287	0.00940175
CCDC141	-1.16155	4.09522	1.17543e-05	0.000834479		PPIA	0.688419	4.81007	0.000277185	0.00857224
PPP1R1C	-1.73079	1.66454	0.000517118	0.0128291		LOC102723559	0.812175	1.72868	0.000839169	0.0178055
COL3A1	2.47511	8.33609	2.21611e-05	0.00136697		AUTS2	1.47504	5.11541	1.40306e-07	2.23067e-05
COL5A2	1.19101	4.8635	0.00123791	0.02236		ELN	2.27778	4.68283	3.4557e-06	0.000327798
MSTN	-1.02391	3.19897	0.000671319	0.0151054		POR	0.547332	3.96574	0.00237725	0.0339675
MYO1B	0.757773	3.81134	0.000457996	0.0118575		CYP51A1	0.738265	3.10743	0.0016686	0.0269844
NABP1	1.02572	1.63839	0.00170593	0.027431		GATAD1	0.656597	3.61708	0.00203719	0.030661
SLC39A10	0.869518	1.95362	0.000993685	0.019644		CDK6	0.85885	2.70439	0.0019194	0.0294779
BOLL	-0.72039	1.91428	0.00318963	0.0405914		GNG11	0.67571	4.71616	0.0015906	0.0261731
BZW1	0.48611	4.99517	0.00333081	0.0417757		COL1A2	1.96981	8.05788	0.000141141	0.00517274
NDUFB3	-0.625223	5.5082	0.000392346	0.0106191		PDK4	1.5384	10.0418	0.0027388	0.0366717
NOP58	0.733178	4.50866	0.000392988	0.0106191		PCOLCE	1.07339	4.42147	0.00127026	0.0225807
NDUFS1	-0.66565	8.10989	0.00156197	0.0258907		PLOD3	0.716524	3.43619	0.00267054	0.036318
IKZF2	-1.12473	3.38194	6.33234e-07	8.40934e-05		ORAI2	1.00075	1.91712	0.000104411	0.0042461
IGFBP2	0.86469	3.09705	0.000259568	0.00827685		IFRD1	1.28819	6.02812	0.000306056	0.0090347
RQCD1	0.487852	4.64986	0.00211226	0.031414		CAV1	0.720167	6.91782	0.000334236	0.00957578
ACSL3	0.843742	5.92229	6.16146e-05	0.00287267		FLNC	1.17613	12.5298	0.000429355	0.0112973
WDFY1	0.696977	4.56138	0.000462524	0.0118929		STRIP2	0.703154	6.19688	0.000322331	0.00940175
COL4A3	0.995242	5.39674	7.43985e-05	0.00331298		SLC35B4	0.744474	2.66494	0.000487302	0.012329
CHRND	1.57981	6.65493	0.000725775	0.0161908		CALD1	0.67233	5.94449	0.00240993	0.0340893
DGKD	1.49226	7.26903	5.36815e-11	4.32826e-08		TMEM140	0.788554	5.01674	0.000522009	0.012922
ASB18	-1.10963	1.54547	0.00373289	0.0451628		CREB3L2	0.654147	4.3759	0.000959288	0.0192677
NDUFA10	-0.519954	6.91254	0.00201253	0.0305342		GIMAP8	0.680886	3.55153	0.00123186	0.0223556
DUSP28	-0.579169	4.06005	0.000885822	0.0183875		GIMAP6	0.559862	4.59963	0.00157931	0.0260632
SNED1	0.628763	4.81282	0.00398792	0.0469645		TMEM176A	1.26963	1.78016	0.000655505	0.0148402
SRXN1	0.805095	4.38142	0.000696248	0.0156247		RHEB	0.742192	5.09422	0.00036441	0.0102837
PRNP	0.544295	5.84806	0.00383501	0.0458691		PRKAG2	3.18344	5.19237	1.44363e-08	4.04504e-06
CDS2	0.754611	5.23634	5.7326e-05	0.00277485		ESYT2	0.51938	6.63824	0.00216753	0.0319831
FLRT3	-1.02759	2.84453	0.00110632	0.0209206		ANGPT2	1.16486	2.20026	0.000334214	0.00957578
RRBP1	0.779898	4.39518	0.00109115	0.0207356		SGK223	0.63637	3.89508	0.000348738	0.00991576
MGME1	-0.539535	3.72769	0.00289755	0.0380763		ASAH1	0.532453	7.01043	0.00086311	0.0181809
ACSS1	-0.852039	5.47515	0.000991804	0.0196412		PSD3	0.945309	1.80593	0.00322268	0.0407829
NANP	0.861678	1.96234	0.00208918	0.0311809		BMP1	1.20481	3.25662	0.000232012	0.00772553
ID1	-1.03382	3.9428	1.43717e-09	5.79384e-07		RHOBTB2	0.641709	5.34666	8.26355e-05	0.00358765
ZNF341	-1.02261	2.08397	2.78083e-05	0.00165211		TNFRSF10B	0.900157	3.34615	1.07173e-05	0.000780496
UQCC1	-0.61379	6.49099	0.000111242	0.00445282		LOXL2	1.8477	2.93753	4.92367e-06	0.000430841
DLGAP4	0.741312	7.19888	0.000398709	0.0106903		EBF2	0.755683	3.28811	0.00266518	0.036318
RBL1	-0.760359	4.12071	0.000155768	0.00558193		KIF13B	0.541372	3.4944	0.00317803	0.0405351
PPP1R16B	1.17646	3.38439	7.41092e-08	1.39424e-05		RBPMS	0.999574	3.24389	0.000457452	0.0118575
MAFB	-0.768148	4.7421	0.00318441	0.0405707		FAM110B	1.00227	4.5504	0.000310595	0.00913021
SRSF6	0.562313	5.64359	0.00267688	0.036318		SDCBP	0.475868	5.47001	0.0041837	0.0482879
JPH2	-0.489979	8.83126	0.00380303	0.0457661		CHD7	0.9881	4.52422	0.000607331	0.0141003
SDC4	1.08537	6.09943	0.0029869	0.0387396		RRS1	0.714087	4.11363	0.00389955	0.046189
PLTP	0.991615	3.69908	6.57785e-05	0.00301138		FABP4	1.5356	5.78907	0.000197136	0.00681516
ZMYND8	-0.658054	3.6742	0.00231322	0.0333482		UBR5	0.722386	6.43895	0.000140188	0.00515455
KCNB1	-0.927959	2.78242	0.00341915	0.0423195		FZD6	0.888735	2.46471	0.000983796	0.0195857
CEBPB	-1.54524	7.04805	6.7613e-12	7.63216e-09		ZHX2	0.4953	5.47488	0.00339053	0.0422432
RBM38	-0.650773	7.95416	0.00145676	0.0245798		FAM91A1	0.73296	2.6294	0.00271339	0.0365946
LAMA5	1.05078	5.01724	1.4027e-06	0.000161568		FAM84B	0.826681	2.68944	0.000297255	0.00887676
LOC102724023	-0.625181	6.44369	0.0016173	0.0264581		MYC	1.43565	3.38951	0.000396619	0.0106596
LOC102724428	2.72791	3.43134	3.64909e-06	0.000340421		ASAP1	0.938774	3.66085	1.57018e-05	0.00105501
ATP5J	-0.536995	6.76167	0.00413851	0.0479981		TIGD5	0.766034	2.93908	0.00272184	0.03662
RUNX1	2.97116	3.94148	4.98389e-11	4.32755e-08		NRBP2	0.77762	3.66972	0.000383364	0.0106064
ETS2	0.920026	5.91285	0.000204141	0.00698286		RFX3	0.863494	2.94643	0.00124597	0.02236
SLC37A1	0.840555	3.49531	0.000126713	0.00484859		CDC37L1	0.817013	5.85005	0.0010269	0.0200547
SIK1	2.83462	3.29819	4.5828e-06	0.000413845		IL33	0.969638	3.73183	0.000265013	0.00830964
C21orf33	-0.685858	6.4469	0.000638853	0.0146321		TEK	0.538058	4.01036	0.00396594	0.046828
COL18A1	0.780307	5.83163	0.000234522	0.00776329		ANXA2P2	1.08764	5.75346	2.87414e-06	0.000279684
COL6A1	0.774475	7.49252	0.00307562	0.0394967		FBXO10	0.913832	5.02737	1.0891e-05	0.000783042
PCNT	0.990014	8.16997	4.8152e-05	0.00245946		SMC5	0.66832	5.18705	0.0014025	0.023987
DGCR6	-0.63164	5.62969	0.000598609	0.0140189		ZFAND5	0.610957	8.38302	0.00402587	0.0471411
SLC25A1	0.977473	2.63394	0.000120526	0.00467486		ANXA1	0.958302	5.40997	0.00136051	0.0235543
CLDN5	0.894587	4.58733	0.00028736	0.00876682		S1PR3	1.25517	2.32075	6.09565e-06	0.000502246
ARVCF	0.810524	4.93866	0.000793173	0.017218		NFIL3	1.70225	4.46872	3.63027e-08	8.36296e-06
TANGO2	0.730675	4.36203	0.000886144	0.0183875		CDC14B	0.835219	2.13959	0.00203349	0.030661
GGT5	1.04335	2.96744	8.64758e-05	0.00372572		AAED1	0.836223	3.03772	0.00188951	0.0292221
KIAA1671	0.746367	6.19041	0.00184602	0.0287818		NR4A3	4.47394	7.29154	8.65272e-08	1.52612e-05
HPS4	0.565975	3.73906	0.0012425	0.02236		ABCA1	0.884127	5.14537	0.00107046	0.0205849
UQCR10	-0.719461	7.01224	0.000271643	0.00842391		RALGAPA1P	0.57565	4.3094	0.000868234	0.0182507
MTMR3	-0.478016	6.35979	0.00213904	0.0316455		ZNF462	0.918604	4.74153	8.08084e-05	0.00353552
TCN2	0.902616	2.34565	0.00105014	0.02037		PTBP3	0.660398	3.34894	0.000640305	0.0146321
HMOX1	1.82543	4.35311	0.000178869	0.00634928		TNC	1.92514	3.86215	2.69955e-05	0.00162955
RBFOX2	0.457935	7.04701	0.00415758	0.0481331		STOM	0.784986	6.41595	3.02001e-05	0.00176631
MYH9	0.810927	7.32564	6.55657e-05	0.00301138		ANGPTL2	1.40487	6.93455	1.16203e-09	4.85814e-07
IFT27	-0.599378	2.8038	0.0029128	0.0381436		FAM102A	1.96374	3.49161	6.38902e-06	0.000518844
TST	-0.668192	4.34371	0.0033665	0.0420464		SPTAN1	0.564154	5.76887	0.00424513	0.0487974
MAFF	3.47766	4.3168	1.0062e-06	0.000124813		LINC00963	1.15669	2.9155	0.000213326	0.00720966
TMEM184B	0.519685	5.03932	0.00111231	0.0209963		NCS1	1.21186	2.00364	0.000461885	0.0118929
DDX17	0.625219	7.79882	0.00105026	0.02037		COL5A1	1.68791	5.29861	0.000345909	0.00986016
RPL3	0.82122	6.95261	0.000807116	0.0173538		UAP1L1	0.824508	1.82376	0.00223088	0.0326617
MGAT3	1.00262	1.98048	0.00121391	0.0221559		TMSB4X	0.653547	5.6722	0.00203274	0.030661
TEF	-1.41304	6.21844	5.47234e-10	3.02471e-07		MOSPD2	0.80875	1.73852	0.000773115	0.0169322
TOB2	-0.96372	6.61998	2.65906e-08	6.52509e-06		SCML1	0.577364	4.41011	0.00227644	0.0330714
ACO2	-0.651912	8.2088	0.00242009	0.0341475		CDKL5	0.76161	2.36875	0.00102414	0.0200356
FAM118A	0.607068	4.07169	0.0021892	0.0321767		CNKSR2	0.594584	3.25964	0.0018924	0.0292221
PPARA	-0.546699	6.59986	0.00197439	0.0301174		KLHL34	0.619327	5.42349	0.00326444	0.0412181
GRAMD4	0.658901	4.31454	5.27235e-05	0.00259888		ACOT9	0.463922	4.16938	0.0026367	0.0360889
CERK	0.707214	4.64495	1.55513e-05	0.00105116		SAT1	1.07006	3.84668	3.35565e-05	0.00189393
PLXNB2	0.820619	4.44649	0.00118328	0.0217894		SRPX	1.35657	2.70029	2.07153e-05	0.00129908
TYMP	0.912377	2.89172	0.00254785	0.0353753		TIMP1	1.29827	4.303	0.000135234	0.00505472
ARSA	0.646453	3.07382	0.00417185	0.0482005		PLP2	1.08849	5.5072	0.000128609	0.00488802
LOC102724770	-0.626254	5.66713	0.000970386	0.0193871		CLCN5	1.28976	3.21063	1.98278e-08	5.08673e-06
LRRN1	-1.39788	3.52736	0.000304663	0.00902633		SHROOM4	0.74828	3.23984	0.000378856	0.0105839
TMEM43	0.769514	5.79654	0.00044859	0.0116944		MSN	0.825683	6.25156	1.08501e-05	0.000783042
FGD5	0.761902	3.93158	0.000297077	0.00887676		OGT	0.577001	6.99249	0.00207956	0.0310915
SH3BP5	1.92719	3.57425	7.89973e-08	1.43826e-05		ARMCX4	1.08215	3.1335	5.21945e-06	0.000445793
ANKRD28	0.631794	6.40914	0.00245761	0.0344188		ARMCX1	0.546629	4.86735	0.00134439	0.0234552
PLCL2	-0.593181	5.86669	5.88636e-05	0.00277485		PLS3	0.753131	5.68148	0.000112836	0.00449378
NR1D2	-1.31445	6.67036	2.3832e-15	8.96718e-12		LONRF3	2.11657	3.59996	1.76279e-06	0.00019133
TGFBR2	0.677435	6.08882	0.00225261	0.032814		SLC25A5	0.965955	4.24295	2.76658e-06	0.000271558
GPD1L	-0.99843	7.97609	1.04321e-08	3.27103e-06		BGN	1.65055	4.94769	1.32953e-05	0.000915105
ACVR2B-AS1	-0.660928	3.12755	0.00160941	0.0264055		FLNA	0.775956	7.20899	0.00189021	0.0292221
ACVR2B	-0.861578	3.82544	6.49096e-06	0.000519645
XIRP1	3.34343	11.2076	4.9077e-08	1.06535e-05
KLHL40	2.03188	9.55483	4.78068e-05	0.00245292
EXOSC7	-0.508755	4.24986	0.00436023	0.0496152
KIF9	1.03618	1.8285	0.00301281	0.038956
PFKFB4	-0.829073	2.47823	0.000644515	0.0146679
SLC38A3	-1.30733	4.84554	6.26381e-06	0.000512361
C3orf18	-0.599161	5.13702	0.000898261	0.0185706
DUSP7	-0.918579	4.56759	3.0412e-07	4.45831e-05
STAB1	1.31698	4.62374	6.58939e-05	0.00301138
SMIM4	-0.654014	3.32072	0.00301925	0.0389946
ITIH4	0.955692	6.59818	6.92073e-05	0.0031124
TKT	1.13047	3.50259	8.70702e-05	0.00373117
FLNB	1.28797	5.44743	6.11806e-08	1.21159e-05
PTPRG	0.572116	4.59782	0.00110381	0.0209206
EOGT	0.651149	4.05817	0.00081282	0.0174432
VGLL3	1.0969	3.04761	0.00211893	0.0314604
CPOX	-0.547097	3.59059	0.00238721	0.033971
FILIP1L	-0.684763	7.27385	0.0024325	0.0342027
PHLDB2	1.00025	3.25558	5.87182e-05	0.00277485
LOC100506621	1.50338	3.83707	1.44288e-05	0.000987108
CCDC80	1.47942	5.20863	3.39657e-05	0.00190748
FSTL1	1.21965	7.03137	0.00334855	0.0419051
KPNA1	0.585586	7.47987	0.00126162	0.0224979
CCDC14	0.815052	3.19357	0.00094303	0.01918
KLF15	-1.55435	5.80126	5.2844e-07	7.27443e-05
SEC61A1	0.71175	6.3342	0.000131595	0.00493503
PLXND1	0.623718	5.12167	0.00363036	0.0442543
SRPRB	0.552744	4.02813	0.000790695	0.0171972
EPHB1	-0.657057	2.94543	0.00282914	0.0374604
PIK3CB	0.825383	5.63607	8.50563e-05	0.0036786
ATP1B3	0.648461	3.7717	0.000281434	0.00863268
PLSCR4	0.878059	3.23034	0.00124527	0.02236
HPS3	0.732685	2.10265	0.00180704	0.0286441
TM4SF18	0.874293	3.03169	0.000475754	0.0121164
TM4SF1	0.627216	5.35844	0.000957553	0.0192675
MECOM	0.722848	2.58233	0.00274193	0.0366717
SKIL	-0.646917	4.63824	0.00145157	0.024563
FNDC3B	1.08054	5.37536	7.70909e-06	0.000608533
ATP11B	0.49127	4.58296	0.00120941	0.0221262
MCCC1	-0.609603	4.47758	0.00059066	0.0139193
MCF2L2	1.40891	3.37976	9.51025e-05	0.00396132
LINC00888	-0.683911	3.49634	0.000380884	0.0105839
MAP6D1	-0.84426	4.45781	4.31709e-05	0.00227254
CHRD	0.716203	2.86837	0.00137178	0.0236408
ETV5	0.971689	2.74279	0.00260257	0.0359581
LPP	0.531183	5.66844	0.00424509	0.0487974
TP63	0.899242	5.31401	0.000293881	0.00884856
ATP13A3	0.516301	4.56814	0.00420395	0.048427
BDH1	-1.08979	4.40417	0.00229081	0.0331879
KIAA0226	0.920102	4.13589	1.7574e-06	0.00019133
GAK	0.520163	4.35787	0.00213745	0.0316455
DOK7	0.673169	4.56707	0.00163312	0.0266012
AFAP1	0.824806	2.70817	0.0040362	0.0472131
WDR1	0.55036	6.96676	0.00334448	0.0419007
GPR125	-0.504676	5.0329	0.00431976	0.0493536
PPARGC1A	3.00937	7.96273	3.45051e-08	8.11444e-06
PI4K2B	0.930524	2.04523	0.000117357	0.00460916
USP46	-0.667134	4.74383	1.71213e-05	0.00111072
KDR	0.937886	3.85711	0.00184603	0.0287818
TMEM165	0.683753	3.56001	0.000980367	0.0195519
IGFBP7	0.763716	7.02358	0.000294743	0.00884856
ENAM	-0.68038	2.84169	0.00336729	0.0420464
RUFY3	0.555162	5.01473	0.00413313	0.0479981
FAM175A	0.62394	3.78088	0.00235747	0.0337705
AGPAT9	1.01534	5.49642	0.000527186	0.0129649
NAP1L5	0.834027	1.56785	0.00176864	0.0281983
EMCN	0.685471	4.43463	0.000588029	0.0139077
SGMS2	1.44267	3.20229	2.73217e-05	0.00163179
PLA2G12A	-0.455036	5.40398	0.00352625	0.0433381
PITX2	-0.796157	5.45103	0.000604829	0.0141003
C4orf32	0.657232	3.87989	0.00229328	0.0331879
ANKRD50	0.605914	2.59436	0.00277306	0.0370003
NDUFC1	-0.691389	6.5329	0.000530789	0.0130251
GAB1	-1.30473	5.07083	5.34428e-08	1.11715e-05
NR3C2	-0.845727	4.71226	1.01266e-07	1.7061e-05
ANXA2P1	1.059	2.45291	0.000447075	0.0116819
GUCY1B3	0.781728	2.65258	0.000442132	0.0116065
ETFDH	-0.585102	6.42545	0.00114653	0.021254
FNIP2	1.94164	5.87358	1.52632e-05	0.0010379
ASB5	2.34715	9.99052	1.24964e-08	3.7121e-06
TENM3	-0.766047	3.33471	0.000332387	0.00957578
ING2	-0.82109	2.82895	0.000238125	0.00783417
STOX2	1.03486	2.47348	0.000206918	0.00702244
SLC25A4	-0.618656	10.1689	0.00234032	0.0336529
SDHA	-0.522088	8.1763	0.00271491	0.0365946
FAM134B	0.913242	8.03873	0.000327003	0.00948898
MYO10	0.62983	4.0501	0.00428527	0.0491341
OSMR	1.28044	3.15804	4.05978e-05	0.00219267
RICTOR	0.890651	5.63281	6.20953e-05	0.00287267
DAB2	0.87456	4.1574	0.00182702	0.0287818
NNT-AS1	-0.648871	4.83068	0.000743098	0.0165446
NNT	-0.623596	8.67221	0.00184337	0.0287818
ITGA1	0.748271	4.05448	0.00173522	0.0277833
FST	1.25903	2.5286	0.00263761	0.0360889
NDUFS4	-0.554993	6.03417	0.00209769	0.0312385
PPAP2A	0.806316	5.41404	3.20091e-07	4.63229e-05
PDE4D	1.40358	7.62188	1.64708e-07	2.58225e-05
NLN	-0.4671	5.26862	0.0035415	0.0434054
ERBB2IP	-0.43779	6.02663	0.00240897	0.0340893
SREK1	0.560112	4.90967	0.00143685	0.0243531
MAST4	1.86781	5.03597	1.42141e-10	1.0028e-07
MRPS27	-0.439724	6.14618	0.00153501	0.0255941
PTCD2	-0.612922	3.55154	0.00203109	0.030661
GFM2	-0.61624	5.10037	0.000799646	0.0172472
LHFPL2	0.927864	2.8552	0.00267002	0.036318
VCAN	1.64809	4.74566	0.000228351	0.00765539
CETN3	-0.720522	2.16593	0.00383597	0.0458691
MCTP1	1.08379	1.84992	0.00038565	0.0106191
CAST	0.595439	8.15431	0.00263047	0.0360786
NREP	-0.807062	5.99623	0.00125255	0.0224425
LOX	2.08685	2.72206	0.000525831	0.0129598
ZNF608	1.16515	2.72759	1.08459e-06	0.000130243
CTXN3	-0.928991	3.00974	0.00165985	0.0268814
SLC12A2	-1.01157	5.12451	1.49922e-08	4.04504e-06
SEC24A	0.725712	3.90051	0.000293733	0.00884856
PCBD2	-0.484761	5.20217	0.00209107	0.0311809
NPY6R	-0.934276	3.83165	0.000847768	0.0179542
EGR1	1.29647	3.70466	0.000770457	0.0169201
ECSCR	0.931697	1.84339	0.000759027	0.0167246
TMEM173	0.791805	3.50131	0.000570787	0.0136217
HBEGF	1.41593	5.70384	0.00348459	0.042988
DIAPH1	1.18625	6.87051	5.00621e-07	7.06376e-05
PPARGC1B	1.29544	3.99957	1.63988e-08	4.30489e-06
MYOZ3	-0.576391	8.08851	0.000995549	0.0196464
GPX3	0.70614	7.33196	0.0023507	0.0337163
SLC36A1	1.53434	3.306	3.38012e-10	2.11971e-07
SPARC	1.15215	8.33263	0.000214212	0.00721798
SH3PXD2B	1.13203	2.63938	0.000646844	0.0146913
NEURL1B	0.672375	4.78875	0.000328753	0.00951528
CPEB4	1.15374	7.1714	0.000461123	0.0118929
PHYKPL	0.633415	4.43069	0.000240827	0.00783417
ADAMTS2	2.19988	3.25768	3.56628e-05	0.00196371
TRIM52	0.868154	1.90007	0.00108952	0.0207356
ECI2	-0.601752	6.02789	0.00155681	0.0258812
SOX4	1.37351	3.24021	7.15327e-10	3.38292e-07
ALDH5A1	-0.834875	6.43779	5.51522e-05	0.00269506
CMAHP	1.27462	1.74398	1.69833e-05	0.00111072
TRIM38	1.13835	3.48549	8.27849e-06	0.000640052
MRPS18B	-0.536526	6.68902	0.00113095	0.021101
PPP1R18	0.943638	3.38917	0.000101216	0.0041396
CLIC1	0.846507	3.93376	0.00123496	0.02236
CFB	1.18289	2.11522	0.00142778	0.0242723
ZBTB9	0.975402	1.8539	0.00175583	0.0280572
FKBP5	-0.904552	7.65909	0.000326106	0.00948734
CDKN1A	3.0538	6.27498	5.523e-08	1.13352e-05
TFEB	-0.677408	5.86594	0.000294123	0.00884856
KLHDC3	-0.666339	8.07276	0.000269452	0.00840214
TMEM63B	0.482786	5.21855	0.00429052	0.0491341
TRAM2	0.966264	3.41073	5.19469e-05	0.00258316
FBXO9	-0.481056	5.64702	0.00319508	0.0406149
SLC17A5	0.736339	2.83677	0.000351938	0.0099816
CD109	1.17899	2.85728	0.00029204	0.00884856
UBE2J1	0.499902	4.37303	0.0015007	0.0251984
BACH2	0.952577	3.6247	3.81473e-06	0.000352956
C6orf203	-0.513975	3.85094	0.00382181	0.0458454
FOXO3	-1.44042	6.37274	4.83772e-12	6.26103e-09
SESN1	-1.09109	7.70124	1.06585e-06	0.000129369
LAMA4	1.04818	4.92053	0.000129954	0.0049061
FAM26E	0.686338	2.5351	0.00142696	0.0242723
VGLL2	1.94108	8.05677	3.24527e-11	3.071e-08
CEP85L	-0.780338	4.15551	5.76197e-05	0.00277485
GJA1	0.850343	3.46877	0.000611302	0.0141401
NCOA7	1.13784	3.06225	2.20565e-08	5.53276e-06
ARHGAP18	-0.94752	3.87581	6.19048e-07	8.37871e-05
SGK1	1.47518	5.83522	2.23169e-06	0.000226949
PDE7B	0.566547	3.13983	0.00388073	0.0460848
TNFAIP3	1.1418	3.59906	2.18389e-06	0.000226949
CITED2	0.902811	6.01212	0.000264122	0.00830476
C6orf211	-0.443472	4.43264	0.00341248	0.0423195
SYNE1	0.879492	7.1443	0.000109507	0.004399
TIAM2	2.51237	2.89158	5.06977e-08	1.07977e-05
SYNJ2	1.36079	3.75745	2.36821e-05	0.00144499
TULP4	0.801176	5.199	0.000641886	0.0146376
DYNLT1	0.659638	4.30527	0.00306477	0.0394022
DKFZp451B082	-1.2283	2.39042	0.00111757	0.0210032
MPC1	-0.591557	6.46509	0.00284493	0.0375598
LOC100507642	-1.03679	1.84176	0.00101021	0.0198223
MAFK	0.721708	5.49118	0.00148357	0.0249576
AP5Z1	0.590796	3.35876	0.00171754	0.0275391
ANKMY2	-0.568419	4.332	0.00103121	0.0201042
TSPAN13	0.919299	2.79277	0.000113847	0.00450913
CDCA7L	-1.03577	1.79134	5.36469e-05	0.00263289
JAZF1	0.650331	2.69705	0.00435296	0.0496152
WIPF3	0.902679	5.53158	0.00101148	0.0198223
STK17A	0.810044	3.39413	0.000322287	0.00940175
PPIA	0.688419	4.81007	0.000277185	0.00857224
LOC102723559	0.812175	1.72868	0.000839169	0.0178055
GBAS	-0.543464	9.05717	0.00433327	0.0494579
AUTS2	1.47504	5.11541	1.40306e-07	2.23067e-05
ELN	2.27778	4.68283	3.4557e-06	0.000327798
WBSCR16	-0.51527	6.62561	0.00300078	0.0388449
POR	0.547332	3.96574	0.00237725	0.0339675
TMEM120A	-0.741027	5.27172	0.00111794	0.0210032
CYP51A1	0.738265	3.10743	0.0016686	0.0269844
GATAD1	0.656597	3.61708	0.00203719	0.030661
CDK6	0.85885	2.70439	0.0019194	0.0294779
GNG11	0.67571	4.71616	0.0015906	0.0261731
COL1A2	1.96981	8.05788	0.000141141	0.00517274
ASB4	-0.617188	5.48903	0.000472213	0.0120596
PDK4	1.5384	10.0418	0.0027388	0.0366717
PCOLCE	1.07339	4.42147	0.00127026	0.0225807
ACHE	-0.766114	7.19631	0.000304045	0.00902633
PLOD3	0.716524	3.43619	0.00267054	0.036318
ORAI2	1.00075	1.91712	0.000104411	0.0042461
DLD	-0.574244	7.72899	0.00315943	0.0403435
IFRD1	1.28819	6.02812	0.000306056	0.0090347
CAV1	0.720167	6.91782	0.000334236	0.00957578
NDUFA5	-0.493936	6.90283	0.00288051	0.0378964
LOC102724567	-0.909473	1.69842	0.000333567	0.00957578
FLNC	1.17613	12.5298	0.000429355	0.0112973
STRIP2	0.703154	6.19688	0.000322331	0.00940175
CHCHD3	-0.550277	6.86709	0.00142996	0.0242728
SLC35B4	0.744474	2.66494	0.000487302	0.012329
CALD1	0.67233	5.94449	0.00240993	0.0340893
TMEM140	0.788554	5.01674	0.000522009	0.012922
CREB3L2	0.654147	4.3759	0.000959288	0.0192677
GIMAP8	0.680886	3.55153	0.00123186	0.0223556
GIMAP6	0.559862	4.59963	0.00157931	0.0260632
TMEM176A	1.26963	1.78016	0.000655505	0.0148402
RHEB	0.742192	5.09422	0.00036441	0.0102837
PRKAG2	3.18344	5.19237	1.44363e-08	4.04504e-06
ESYT2	0.51938	6.63824	0.00216753	0.0319831
ANGPT2	1.16486	2.20026	0.000334214	0.00957578
SGK223	0.63637	3.89508	0.000348738	0.00991576
ASAH1	0.532453	7.01043	0.00086311	0.0181809
PSD3	0.945309	1.80593	0.00322268	0.0407829
BMP1	1.20481	3.25662	0.000232012	0.00772553
RHOBTB2	0.641709	5.34666	8.26355e-05	0.00358765
TNFRSF10B	0.900157	3.34615	1.07173e-05	0.000780496
LOXL2	1.8477	2.93753	4.92367e-06	0.000430841
EBF2	0.755683	3.28811	0.00266518	0.036318
KIF13B	0.541372	3.4944	0.00317803	0.0405351
RBPMS	0.999574	3.24389	0.000457452	0.0118575
ANK1	-0.594147	8.87506	0.0029055	0.0381364
VDAC3	-0.566272	8.24569	0.00184479	0.0287818
CEBPD	-1.50346	4.4287	1.09768e-08	3.34882e-06
C8orf22	-1.27464	7.92047	0.00372673	0.0451366
LOC102724330	-0.681669	2.18883	0.00139062	0.0238562
FAM110B	1.00227	4.5504	0.000310595	0.00913021
SDCBP	0.475868	5.47001	0.0041837	0.0482879
CHD7	0.9881	4.52422	0.000607331	0.0141003
RRS1	0.714087	4.11363	0.00389955	0.046189
MRPS28	-0.526141	5.10554	0.000608331	0.0141003
FABP4	1.5356	5.78907	0.000197136	0.00681516
DECR1	-0.585986	5.76693	0.00231215	0.0333482
PDP1	-0.859042	5.63406	0.000106908	0.00430993
UBR5	0.722386	6.43895	0.000140188	0.00515455
FZD6	0.888735	2.46471	0.000983796	0.0195857
ANGPT1	-1.15559	5.04308	1.5824e-06	0.000176852
ZHX2	0.4953	5.47488	0.00339053	0.0422432
FAM91A1	0.73296	2.6294	0.00271339	0.0365946
TRIB1	-0.657163	5.84994	0.00147282	0.0248137
FAM84B	0.826681	2.68944	0.000297255	0.00887676
MYC	1.43565	3.38951	0.000396619	0.0106596
ASAP1	0.938774	3.66085	1.57018e-05	0.00105501
TIGD5	0.766034	2.93908	0.00272184	0.03662
NRBP2	0.77762	3.66972	0.000383364	0.0106064
ZNF252P	-0.524612	4.93534	0.000606348	0.0141003
RFX3	0.863494	2.94643	0.00124597	0.02236
CDC37L1	0.817013	5.85005	0.0010269	0.0200547
IL33	0.969638	3.73183	0.000265013	0.00830964
TEK	0.538058	4.01036	0.00396594	0.046828
MOB3B	-1.15729	2.94898	0.000104932	0.0042461
ANXA2P2	1.08764	5.75346	2.87414e-06	0.000279684
HINT2	-0.54136	4.33328	0.00244693	0.0343117
FBXO10	0.913832	5.02737	1.0891e-05	0.000783042
SMC5	0.66832	5.18705	0.0014025	0.023987
KLF9	-0.919912	7.31537	1.34091e-07	2.16231e-05
ZFAND5	0.610957	8.38302	0.00402587	0.0471411
ALDH1A1	-1.05836	5.75924	8.8467e-06	0.000673856
ANXA1	0.958302	5.40997	0.00136051	0.0235543
TLE1	-0.951094	6.05724	9.14003e-09	3.03449e-06
S1PR3	1.25517	2.32075	6.09565e-06	0.000502246
GADD45G	-2.17601	4.74157	1.19787e-07	1.98846e-05
NFIL3	1.70225	4.46872	3.63027e-08	8.36296e-06
CDC14B	0.835219	2.13959	0.00203349	0.030661
AAED1	0.836223	3.03772	0.00188951	0.0292221
NR4A3	4.47394	7.29154	8.65272e-08	1.52612e-05
ABCA1	0.884127	5.14537	0.00107046	0.0205849
RALGAPA1P	0.57565	4.3094	0.000868234	0.0182507
ZNF462	0.918604	4.74153	8.08084e-05	0.00353552
TMEM245	-0.470059	6.93759	0.00406228	0.0473916
PTBP3	0.660398	3.34894	0.000640305	0.0146321
RGS3	-1.07247	5.17408	0.000205472	0.00700716
TNC	1.92514	3.86215	2.69955e-05	0.00162955
MEGF9	-0.496075	4.19189	0.00327744	0.0412899
STOM	0.784986	6.41595	3.02001e-05	0.00176631
MVB12B	-0.739265	5.5457	1.9479e-06	0.000206076
ANGPTL2	1.40487	6.93455	1.16203e-09	4.85814e-07
FAM102A	1.96374	3.49161	6.38902e-06	0.000518844
SLC25A25	-1.23713	5.26277	0.000638517	0.0146321
SPTAN1	0.564154	5.76887	0.00424513	0.0487974
LINC00963	1.15669	2.9155	0.000213326	0.00720966
NCS1	1.21186	2.00364	0.000461885	0.0118929
FAM78A	-0.85326	6.011	7.84615e-07	9.95139e-05
COL5A1	1.68791	5.29861	0.000345909	0.00986016
UAP1L1	0.824508	1.82376	0.00223088	0.0326617
TMSB4X	0.653547	5.6722	0.00203274	0.030661
MOSPD2	0.80875	1.73852	0.000773115	0.0169322
SCML1	0.577364	4.41011	0.00227644	0.0330714
CDKL5	0.76161	2.36875	0.00102414	0.0200356
CNKSR2	0.594584	3.25964	0.0018924	0.0292221
KLHL34	0.619327	5.42349	0.00326444	0.0412181
ACOT9	0.463922	4.16938	0.0026367	0.0360889
SAT1	1.07006	3.84668	3.35565e-05	0.00189393
DCAF8L1	-0.698539	1.59095	0.00258582	0.0357706
SRPX	1.35657	2.70029	2.07153e-05	0.00129908
MID1IP1	-1.05663	6.64475	9.03918e-08	1.56976e-05
MAOB	-0.646764	6.43515	0.00401656	0.0470809
TIMP1	1.29827	4.303	0.000135234	0.00505472
PLP2	1.08849	5.5072	0.000128609	0.00488802
CLCN5	1.28976	3.21063	1.98278e-08	5.08673e-06
SHROOM4	0.74828	3.23984	0.000378856	0.0105839
AMER1	-0.731042	2.91012	0.000784015	0.0170849
MSN	0.825683	6.25156	1.08501e-05	0.000783042
OGT	0.577001	6.99249	0.00207956	0.0310915
ARMCX4	1.08215	3.1335	5.21945e-06	0.000445793
ARMCX1	0.546629	4.86735	0.00134439	0.0234552
MUM1L1	-0.598782	4.2767	0.00340202	0.0423195
TSC22D3	-0.958833	6.72168	7.35285e-08	1.39424e-05
TMEM164	-0.601866	4.85158	0.000998959	0.0196793
PLS3	0.753131	5.68148	0.000112836	0.00449378
LONRF3	2.11657	3.59996	1.76279e-06	0.00019133
SLC25A5	0.965955	4.24295	2.76658e-06	0.000271558
SLITRK4	-1.40885	3.45733	0.00199619	0.030327
BGN	1.65055	4.94769	1.32953e-05	0.000915105
FLNA	0.775956	7.20899	0.00189021	0.0292221

## Sheet: BL.O vs ECC.O
All differentially expressed genes						Up-regulated genes						Down-regulated genes
Gene	logFC	logCPM	PValue	FDR		Gene	logFC	logCPM	PValue	FDR		Gene	logFC	logCPM	PValue	FDR
GLTPD1	-1.0729	5.63703	1.46652e-06	7.2427e-05		ERRFI1	2.39888	4.96508	8.71006e-08	6.30714e-06		GLTPD1	-1.0729	5.63703	1.46652e-06	7.2427e-05
PER3	-1.36857	5.52613	3.79263e-13	1.31115e-10		TNFRSF1B	1.21008	4.14478	3.16925e-07	1.88694e-05		PER3	-1.36857	5.52613	3.79263e-13	1.31115e-10
ERRFI1	2.39888	4.96508	8.71006e-08	6.30714e-06		PRDM2	1.07337	6.02074	0.00031024	0.00643102		H6PD	-0.796092	6.87829	0.000100618	0.00251358
H6PD	-0.796092	6.87829	0.000100618	0.00251358		SPEN	1.01767	5.99635	9.05057e-09	8.36163e-07		C1orf127	-1.03138	4.70075	0.00055357	0.0100383
C1orf127	-1.03138	4.70075	0.00055357	0.0100383		HSPB7	1.15103	11.2201	1.78015e-06	8.51691e-05		TMEM57	-0.790517	5.02703	2.22849e-06	0.00010521
TNFRSF1B	1.21008	4.14478	3.16925e-07	1.88694e-05		RCC2	1.29345	3.06853	3.46755e-06	0.000156801		EXTL1	-1.06919	4.7902	2.98566e-05	0.000911606
PRDM2	1.07337	6.02074	0.00031024	0.00643102		PQLC2	0.935369	2.87807	3.60773e-05	0.00106807		CEP85	-0.779157	6.80628	0.000638602	0.0111102
SPEN	1.01767	5.99635	9.05057e-09	8.36163e-07		SRSF10	1.14003	5.26718	1.44152e-07	9.83995e-06		FHL3	-0.637861	10.1326	0.00203727	0.0283744
HSPB7	1.15103	11.2201	1.78015e-06	8.51691e-05		CLIC4	0.789948	5.65647	0.00109112	0.0168568		TESK2	-1.11086	3.01534	0.000178258	0.00401342
RCC2	1.29345	3.06853	3.46755e-06	0.000156801		ZDHHC18	0.727545	3.24615	0.00119252	0.0181023		AMIGO1	-0.909926	3.67771	1.91711e-05	0.000638065
PQLC2	0.935369	2.87807	3.60773e-05	0.00106807		SLC9A1	0.999493	3.3575	0.000407764	0.00793933		FAM46C	-1.4805	5.22856	1.45753e-05	0.000497462
SRSF10	1.14003	5.26718	1.44152e-07	9.83995e-06		STX12	0.59872	4.12886	0.00179635	0.025465		C1orf51	-3.19153	4.00728	6.9397e-32	7.43728e-28
CLIC4	0.789948	5.65647	0.00109112	0.0168568		PHC2	0.575727	6.0189	0.00126974	0.0190585		TOMM40L	-0.791641	4.65576	0.000276857	0.00584071
TMEM57	-0.790517	5.02703	2.22849e-06	0.00010521		SFPQ	0.972319	6.58112	9.56713e-06	0.000347325		RCSD1	-0.812651	7.4683	0.000249347	0.00533383
EXTL1	-1.06919	4.7902	2.98566e-05	0.000911606		EVA1B	0.951814	1.7338	0.003599	0.0431437		DENND1B	-0.642435	4.30052	0.000442987	0.00838779
CEP85	-0.779157	6.80628	0.000638602	0.0111102		ZC3H12A	1.12209	2.28	0.00152791	0.0221578		SLC45A3	-2.32654	2.97218	1.67939e-06	8.18094e-05
ZDHHC18	0.727545	3.24615	0.00119252	0.0181023		HEYL	1.23849	3.13455	7.81306e-06	0.000294833		CNST	-0.716055	5.39888	2.47508e-05	0.000791806
SLC9A1	0.999493	3.3575	0.000407764	0.00793933		KCNQ4	1.31057	3.27707	1.86826e-08	1.62781e-06		PRKCQ	-0.828802	7.29543	5.31694e-05	0.00147621
STX12	0.59872	4.12886	0.00179635	0.025465		MAST2	0.638391	8.0873	0.000809813	0.0135183		LOC102723721	-1.49388	2.91877	0.000163751	0.00372499
PHC2	0.575727	6.0189	0.00126974	0.0190585		OSBPL9	1.23289	6.28254	7.54796e-09	7.22246e-07		CDNF	-0.697245	3.95232	0.000857581	0.0141395
SFPQ	0.972319	6.58112	9.56713e-06	0.000347325		COA7	0.614673	3.95972	0.00304811	0.0386587		PTER	-0.69782	3.48944	0.00127821	0.0191054
EVA1B	0.951814	1.7338	0.003599	0.0431437		CACHD1	1.16225	2.83857	5.59947e-06	0.000232595		THNSL1	-0.84901	2.51583	0.00122138	0.0185142
ZC3H12A	1.12209	2.28	0.00152791	0.0221578		IL12RB2	2.42203	3.04271	1.11628e-08	1.01383e-06		MPP7	-0.700626	4.65939	0.000114005	0.00276423
FHL3	-0.637861	10.1326	0.00203727	0.0283744		GADD45A	3.36673	5.0436	7.59682e-13	2.39456e-10		SGPL1	-0.800947	3.7716	0.000115485	0.0027875
HEYL	1.23849	3.13455	7.81306e-06	0.000294833		GNG12	0.639123	4.6812	0.0029333	0.0376031		LGI1	-0.881894	2.36964	0.00193838	0.0271906
KCNQ4	1.31057	3.27707	1.86826e-08	1.62781e-06		NEXN	0.802353	9.29324	0.000124292	0.00295385		FAM178A	-0.631998	5.34178	0.00030866	0.00641068
TESK2	-1.11086	3.01534	0.000178258	0.00401342		FUBP1	0.972688	4.94457	7.95539e-07	4.30595e-05		LDB1	-0.65545	5.44596	0.000717049	0.0122954
MAST2	0.638391	8.0873	0.000809813	0.0135183		DNAJB4	2.48642	7.97842	8.47228e-10	1.08092e-07		PITX3	-1.40087	3.55681	9.17094e-06	0.000335444
OSBPL9	1.23289	6.28254	7.54796e-09	7.22246e-07		ELTD1	1.21286	4.12477	1.77714e-07	1.19035e-05		SUFU	-0.788273	3.46307	0.00129203	0.0192851
COA7	0.614673	3.95972	0.00304811	0.0386587		DDAH1	0.737013	5.89904	0.00257597	0.0340823		WBP1L	-0.789232	5.43627	0.000264143	0.00562751
CACHD1	1.16225	2.83857	5.59947e-06	0.000232595		CYR61	3.72593	6.80793	1.06789e-09	1.28591e-07		LOC102724536	-0.83341	5.27872	7.24886e-05	0.00189017
IL12RB2	2.42203	3.04271	1.11628e-08	1.01383e-06		GBP2	1.30025	5.53903	1.53486e-06	7.54546e-05		ART1	-0.788552	5.31565	0.00137731	0.0203595
GADD45A	3.36673	5.0436	7.59682e-13	2.39456e-10		LRRC8B	3.07961	4.3768	2.97833e-10	4.43317e-08		CHRNA10	-0.768974	5.32735	0.00308745	0.0388333
GNG12	0.639123	4.6812	0.0029333	0.0376031		ZNF326	0.707556	2.91812	0.00323086	0.0399367		B3GNT1	-0.667156	4.35017	0.000774581	0.0130317
NEXN	0.802353	9.29324	0.000124292	0.00295385		TMED5	0.626424	6.36285	0.000662908	0.0114587		SLC29A2	-0.747165	6.1525	7.67059e-05	0.00198565
FUBP1	0.972688	4.94457	7.95539e-07	4.30595e-05		DNTTIP2	0.689955	5.17248	0.00281045	0.0364203		PELI3	-0.816744	3.54724	0.00019487	0.00432385
DNAJB4	2.48642	7.97842	8.47228e-10	1.08092e-07		GCLM	1.18308	4.87579	0.00101457	0.0160608		DIXDC1	-1.11906	4.95521	3.97283e-07	2.31396e-05
ELTD1	1.21286	4.12477	1.77714e-07	1.19035e-05		PALMD	0.941477	6.59567	2.48363e-07	1.56571e-05		NCAM1	-1.16434	4.25435	0.00275378	0.0358158
DDAH1	0.737013	5.89904	0.00257597	0.0340823		SLC30A7	0.821107	2.4711	0.00251161	0.0335205		SCN2B	-1.41414	3.67669	0.000206579	0.004546
CYR61	3.72593	6.80793	1.06789e-09	1.28591e-07		GPSM2	2.65043	4.23514	4.30795e-07	2.48216e-05		BHLHE41	-0.949846	6.54677	9.57461e-05	0.00240307
GBP2	1.30025	5.53903	1.53486e-06	7.54546e-05		SORT1	0.850855	7.41909	4.71924e-06	0.000200699		LGR5	-1.10622	4.9881	4.63733e-06	0.000198793
LRRC8B	3.07961	4.3768	2.97833e-10	4.43317e-08		AMPD2	0.988043	2.27788	0.000563172	0.0101437		TPCN1	-0.533256	5.59364	0.00176177	0.0250742
ZNF326	0.707556	2.91812	0.00323086	0.0399367		CSF1	1.44325	4.16306	4.29116e-06	0.000185437		VSIG10	-1.14935	4.75201	8.01024e-08	5.87984e-06
TMED5	0.626424	6.36285	0.000662908	0.0114587		RBM15	0.994413	3.05227	0.00021218	0.00465017		MLEC	-0.608086	7.1709	0.000931743	0.0149483
DNTTIP2	0.689955	5.17248	0.00281045	0.0364203		ATP1A1	0.832737	5.69086	0.000542027	0.00984561		SGCG	-0.599362	6.49191	0.00348575	0.0421635
GCLM	1.18308	4.87579	0.00101457	0.0160608		CD58	0.791998	1.81444	0.00235226	0.0317096		TSC22D1	-0.605432	7.6325	0.00309086	0.0388333
PALMD	0.941477	6.59567	2.48363e-07	1.56571e-05		WDR3	0.83731	4.35018	0.00177532	0.0252336		KLHL33	-1.02878	6.19859	7.51915e-06	0.000288827
SLC30A7	0.821107	2.4711	0.00251161	0.0335205		ZNF697	0.719007	2.45781	0.00354051	0.0426421		SLC7A8	-0.875025	3.63176	0.000758473	0.012882
GPSM2	2.65043	4.23514	4.30795e-07	2.48216e-05		RNF115	1.87036	7.14288	2.18167e-11	4.10192e-09		NFKBIA	-1.24895	5.39604	5.14166e-06	0.000216942
SORT1	0.850855	7.41909	4.71924e-06	0.000200699		NUDT4P2	2.64771	7.18538	3.00502e-09	3.15733e-07		CTAGE5	-0.906445	5.05236	6.27942e-06	0.000252995
AMIGO1	-0.909926	3.67771	1.91711e-05	0.000638065		BCL9	0.855963	4.08513	0.00183141	0.0259276		SIX1	-0.882806	6.88286	0.000489148	0.00910104
AMPD2	0.988043	2.27788	0.000563172	0.0101437		NUDT4P1	2.71677	7.19552	1.16721e-09	1.37028e-07		ARG2	-1.30391	4.11558	0.000877746	0.0143644
CSF1	1.44325	4.16306	4.29116e-06	0.000185437		HIST2H2BE	0.607237	5.88609	0.000313677	0.00647721		EXD2	-0.633375	3.96361	0.00347373	0.0421608
RBM15	0.994413	3.05227	0.00021218	0.00465017		OTUD7B	0.857737	5.92613	3.51674e-06	0.000158357		SMOC1	-0.822864	4.09595	0.00200484	0.0280129
ATP1A1	0.832737	5.69086	0.000542027	0.00984561		PLEKHO1	1.26866	5.63596	5.93043e-05	0.00160496		JDP2	-0.745611	3.68603	0.00330288	0.040733
CD58	0.791998	1.81444	0.00235226	0.0317096		PI4KB	0.618386	6.0077	0.00251735	0.0335465		STON2	-0.904533	3.98389	0.00126724	0.0190477
FAM46C	-1.4805	5.22856	1.45753e-05	0.000497462		IL6R	2.76921	6.34536	5.01794e-12	1.12036e-09		KLF13	-1.00208	6.50225	8.76828e-07	4.69848e-05
WDR3	0.83731	4.35018	0.00177532	0.0252336		ARHGEF2	0.784337	4.24185	0.00352331	0.0425217		RASL12	-0.807307	4.46551	2.65721e-05	0.000835111
ZNF697	0.719007	2.45781	0.00354051	0.0426421		IFI16	1.38652	4.0018	2.71609e-05	0.000846174		KBTBD13	-0.875055	4.94355	0.00255316	0.03389
RNF115	1.87036	7.14288	2.18167e-11	4.10192e-09		DARC	1.39445	3.42245	0.000983485	0.0156612		NEO1	-0.500146	5.98417	0.00416599	0.048635
NUDT4P2	2.64771	7.18538	3.00502e-09	3.15733e-07		UCK2	2.11002	4.19931	1.20808e-08	1.08798e-06		NRG4	-0.939312	2.49705	0.00359441	0.0431437
BCL9	0.855963	4.08513	0.00183141	0.0259276		DUSP27	0.619241	7.53784	0.00205211	0.028497		RPUSD1	-0.678204	3.06228	0.00310706	0.0389
NUDT4P1	2.71677	7.19552	1.16721e-09	1.37028e-07		POU2F1	0.682582	3.36952	0.0027918	0.0362224		PAQR4	-0.745087	3.98409	0.000281675	0.00593068
HIST2H2BE	0.607237	5.88609	0.000313677	0.00647721		RASAL2	1.87076	5.26357	4.57837e-08	3.66167e-06		SEC14L5	-1.39711	3.48889	0.00125313	0.0189153
OTUD7B	0.857737	5.92613	3.51674e-06	0.000158357		XPR1	0.826005	3.64755	0.000236377	0.00513845		IQCK	-0.638104	3.52612	0.00147628	0.0216434
PLEKHO1	1.26866	5.63596	5.93043e-05	0.00160496		LAMC1	0.759944	6.92189	0.000394979	0.00776695		SBK1	-1.13156	5.55446	2.95402e-11	5.27636e-09
C1orf51	-3.19153	4.00728	6.9397e-32	7.43728e-28		CAMSAP2	0.797381	4.40227	4.75376e-05	0.00133717		PAGR1	-0.554169	4.75683	0.00170741	0.0243977
PI4KB	0.618386	6.0077	0.00251735	0.0335465		KDM5B	0.760218	3.2234	0.000987724	0.0157054		CNEP1R1	-0.692382	3.52399	0.00191185	0.0268888
IL6R	2.76921	6.34536	5.01794e-12	1.12036e-09		MYOG	1.47831	6.2556	2.64565e-07	1.6295e-05		MT1X	-0.928431	6.5511	0.00266802	0.0350406
ARHGEF2	0.784337	4.24185	0.00352331	0.0425217		ATP2B4	0.940406	5.63113	0.000165005	0.00373859		NFATC3	-0.532783	5.33833	0.00165589	0.0236932
IFI16	1.38652	4.0018	2.71609e-05	0.000846174		RASSF5	1.98298	2.94044	4.87211e-07	2.76267e-05		OSGIN1	-1.16127	3.42138	0.000721472	0.0123515
DARC	1.39445	3.42245	0.000983485	0.0156612		DIEXF	0.901626	3.09943	0.000527369	0.00962831		ABR	-0.691245	4.91216	0.001075	0.016721
TOMM40L	-0.791641	4.65576	0.000276857	0.00584071		LPGAT1	0.870929	5.15709	1.57137e-05	0.000532925		WSCD1	-0.913855	4.68499	0.000413475	0.00801308
UCK2	2.11002	4.19931	1.20808e-08	1.08798e-06		PPP2R5A	0.961925	6.10925	9.39927e-07	4.98673e-05		SLC2A4	-0.633965	8.12809	0.00154935	0.0224384
DUSP27	0.619241	7.53784	0.00205211	0.028497		ATF3	4.42101	6.13556	9.82656e-11	1.62017e-08		PER1	-2.70546	6.96863	4.64477e-18	4.14817e-15
POU2F1	0.682582	3.36952	0.0027918	0.0362224		ESRRG	1.13388	4.54825	0.00252761	0.0336084		FOXO3B	-1.52222	4.87098	2.29379e-10	3.51179e-08
RCSD1	-0.812651	7.4683	0.000249347	0.00533383		TGFB2	2.85466	5.59864	2.11915e-11	4.05552e-09		THRA	-0.711775	5.97205	1.72488e-05	0.000581308
RASAL2	1.87076	5.26357	4.57837e-08	3.66167e-06		LYPLAL1	0.611401	4.23672	0.00108932	0.0168568		NSF	-0.718928	4.26467	0.00162016	0.0232439
XPR1	0.826005	3.64755	0.000236377	0.00513845		DUSP10	1.92589	5.31668	3.25576e-09	3.355e-07		OSBPL7	-0.832695	3.77017	0.00395473	0.0466258
LAMC1	0.759944	6.92189	0.000394979	0.00776695		TP53BP2	1.62742	5.07306	9.80751e-06	0.000352709		CHAD	-1.78384	2.62171	2.52905e-05	0.000799523
DENND1B	-0.642435	4.30052	0.000442987	0.00838779		ENAH	4.03737	8.7488	1.45985e-24	7.82262e-21		HLF	-1.26675	3.77067	3.96982e-09	4.05186e-07
CAMSAP2	0.797381	4.40227	4.75376e-05	0.00133717		LOC102723834	2.06383	3.98551	2.80003e-05	0.00086728		AKAP1	-0.560859	7.96413	0.00346683	0.0421608
KDM5B	0.760218	3.2234	0.000987724	0.0157054		ITPKB	0.953267	4.31684	5.17658e-05	0.00144472		CA4	-1.33236	2.38479	4.01015e-05	0.00116561
MYOG	1.47831	6.2556	2.64565e-07	1.6295e-05		URB2	0.984084	3.41039	0.000158519	0.00362228		CACNG1	-0.808021	7.17807	9.15288e-05	0.00230803
ATP2B4	0.940406	5.63113	0.000165005	0.00373859		EGLN1	0.698732	8.71532	0.000373613	0.00742859		GPRC5C	-0.884648	5.30889	5.49132e-05	0.0015134
SLC45A3	-2.32654	2.97218	1.67939e-06	8.18094e-05		TSNAX	0.673358	5.06462	0.000323239	0.00659838		GNAL	-1.05845	4.09702	7.43029e-06	0.000288516
RASSF5	1.98298	2.94044	4.87211e-07	2.76267e-05		ERO1LB	0.890124	2.25276	0.000512094	0.00942974		AQP4	-0.990109	6.41534	1.07959e-05	0.000384383
DIEXF	0.901626	3.09943	0.000527369	0.00962831		EDARADD	0.690605	3.66393	0.00151146	0.0219787		BCL2	-0.590001	5.82862	0.00273583	0.0356689
LPGAT1	0.870929	5.15709	1.57137e-05	0.000532925		ACTN2	0.70152	12.8075	0.000608392	0.0107239		PDE4A	-0.871815	5.30361	3.6526e-06	0.000163104
PPP2R5A	0.961925	6.10925	9.39927e-07	4.98673e-05		HNRNPU	0.924391	7.5266	9.44923e-07	4.98854e-05		ANO8	-0.586944	3.92243	0.00250117	0.0334227
ATF3	4.42101	6.13556	9.82656e-11	1.62017e-08		GTPBP4	0.604845	4.98745	0.00211009	0.0291792		SLC27A1	-0.907877	5.22757	5.8206e-06	0.000239001
ESRRG	1.13388	4.54825	0.00252761	0.0336084		IDI1	0.64356	5.5993	0.0010916	0.0168568		PLEKHF1	-2.06642	5.23604	2.914e-10	4.3985e-08
TGFB2	2.85466	5.59864	2.11915e-11	4.05552e-09		KLF6	1.54595	6.04156	4.01377e-06	0.000176293		NUDT19	-0.848664	4.96048	3.3558e-05	0.00100459
LYPLAL1	0.611401	4.23672	0.00108932	0.0168568		IL15RA	0.843952	2.23841	0.000593455	0.0105474		WDR62	-0.866443	6.58562	0.00187125	0.0263525
DUSP10	1.92589	5.31668	3.25576e-09	3.355e-07		NMT2	0.580546	3.3322	0.00389874	0.0460671		DBP	-2.17581	4.24001	1.70758e-16	1.07648e-13
TP53BP2	1.62742	5.07306	9.80751e-06	0.000352709		ARL5B	0.790415	3.46197	0.00141599	0.0208737		KCNA7	-0.834291	6.24141	0.000122166	0.00291593
ENAH	4.03737	8.7488	1.45985e-24	7.82262e-21		OTUD1	3.1642	8.35674	1.73119e-06	8.35726e-05		PRR12	-0.843578	4.48721	0.000334721	0.00678112
LOC102723834	2.06383	3.98551	2.80003e-05	0.00086728		KIAA1217	1.01995	6.61686	7.48802e-06	0.000288666		GALM	-0.665633	3.38961	0.00271876	0.0355329
ITPKB	0.953267	4.31684	5.17658e-05	0.00144472		ABI1	0.710338	4.74442	0.000574765	0.0102834		SOS1	-0.702295	5.32724	8.7305e-05	0.00220672
URB2	0.984084	3.41039	0.000158519	0.00362228		NRP1	0.662682	5.81864	0.001141	0.0174937		LGALSL	-1.27778	5.9144	3.00847e-08	2.51888e-06
EGLN1	0.698732	8.71532	0.000373613	0.00742859		RHEBP2	0.732687	4.39985	0.000157831	0.00361426		PCYOX1	-0.841117	7.06467	5.93072e-06	0.000242097
TSNAX	0.673358	5.06462	0.000323239	0.00659838		PRKG1	1.1838	6.79827	0.000334636	0.00678112		FAM136A	-0.691851	3.73665	0.00114843	0.0175573
ERO1LB	0.890124	2.25276	0.000512094	0.00942974		IPMK	1.20397	2.55162	0.0010378	0.0162843		STARD7	-0.604481	7.4705	0.000781392	0.0131051
EDARADD	0.690605	3.66393	0.00151146	0.0219787		ARID5B	1.40071	6.24681	2.39569e-05	0.00077802		TMEM131	-0.55505	5.91641	0.00319496	0.039676
ACTN2	0.70152	12.8075	0.000608392	0.0107239		JMJD1C	0.783812	5.5049	0.00088803	0.0144856		NPHP1	-0.815827	4.06893	0.00159842	0.0230866
HNRNPU	0.924391	7.5266	9.44923e-07	4.98854e-05		ANXA2P3	1.18525	2.16431	0.00111036	0.0170729		STEAP3	-0.699945	5.16386	0.000211431	0.00464324
CNST	-0.716055	5.39888	2.47508e-05	0.000791806		SIRT1	1.01829	4.81535	3.64444e-05	0.00107596		ITGB6	-0.708782	6.87142	0.00037975	0.0075269
GTPBP4	0.604845	4.98745	0.00211009	0.0291792		DDX21	1.15101	5.95136	9.36619e-06	0.00034142		FASTKD1	-0.641514	3.55152	0.00349907	0.0422769
IDI1	0.64356	5.5993	0.0010916	0.0168568		TSPAN15	0.699428	3.4951	0.00267708	0.0350736		OSGEPL1	-1.03537	2.8849	0.000150639	0.00349182
KLF6	1.54595	6.04156	4.01377e-06	0.000176293		CHST3	0.929401	4.42369	0.0040162	0.0472465		C2orf88	-0.717689	3.84881	0.00311166	0.038912
IL15RA	0.843952	2.23841	0.000593455	0.0105474		P4HA1	0.93708	5.8771	0.000190484	0.00423531		MSTN	-1.45983	3.08818	7.24217e-05	0.00189017
PRKCQ	-0.828802	7.29543	5.31694e-05	0.00147621		USP54	1.11877	6.97335	9.04873e-06	0.000332107		FZD7	-0.948219	5.13426	0.000266442	0.00564321
LOC102723721	-1.49388	2.91877	0.000163751	0.00372499		PLAU	2.56314	3.90092	1.4027e-07	9.74981e-06		ZDBF2	-0.614478	4.05492	0.0037511	0.0444696
CDNF	-0.697245	3.95232	0.000857581	0.0141395		DLG5	0.787534	5.42853	0.000617207	0.0108614		IKZF2	-0.933622	3.42419	6.15687e-05	0.00165371
NMT2	0.580546	3.3322	0.00389874	0.0460671		ZMIZ1	0.733192	5.33361	0.000381255	0.00753857		SMARCAL1	-0.761604	3.24505	0.000944715	0.0151338
PTER	-0.69782	3.48944	0.00127821	0.0191054		CCSER2	0.615632	7.61542	0.000736978	0.0125567		TCF15	-0.932184	2.15411	0.00203865	0.0283744
ARL5B	0.790415	3.46197	0.00141599	0.0208737		BMPR1A	0.758062	4.363	0.000137527	0.00323218		CSRP2BP	-0.55544	4.52142	0.00347063	0.0421608
OTUD1	3.1642	8.35674	1.73119e-06	8.35726e-05		ANKRD1	5.27711	10.2977	7.07555e-13	2.29784e-10		MYLK2	-0.719964	9.3988	0.00306151	0.0387099
KIAA1217	1.01995	6.61686	7.48802e-06	0.000288666		PCGF5	0.735621	6.1256	0.00112168	0.0172222		PXMP4	-0.67565	3.54338	0.000979195	0.0156161
THNSL1	-0.84901	2.51583	0.00122138	0.0185142		38412	0.652797	4.95551	0.000860038	0.0141583		NDRG3	-1.18343	3.77664	8.8933e-09	8.36048e-07
ABI1	0.710338	4.74442	0.000574765	0.0102834		SORBS1	0.843487	8.89793	4.93398e-06	0.000209002		RBL1	-0.897658	4.04545	4.01336e-05	0.00116561
MPP7	-0.700626	4.65939	0.000114005	0.00276423		RRP12	1.42005	5.60715	9.14618e-08	6.53464e-06		ZMYND8	-0.877922	3.56954	0.000491669	0.00911876
NRP1	0.662682	5.81864	0.001141	0.0174937		DNMBP	1.22538	4.67694	5.24271e-05	0.00145938		CEBPB	-1.44973	7.08121	3.25055e-09	3.355e-07
RHEBP2	0.732687	4.39985	0.000157831	0.00361426		SCD	3.40811	6.18374	0.000644626	0.0111968		RBM38	-0.63876	7.91058	0.00198106	0.027753
PRKG1	1.1838	6.79827	0.000334636	0.00678112		C10orf2	0.994721	3.80122	0.000829313	0.0137369		ZNF74	-0.9982	2.7454	1.14986e-05	0.000405365
IPMK	1.20397	2.55162	0.0010378	0.0162843		PPRC1	1.84504	4.72032	8.11542e-08	5.91653e-06		TEF	-1.88703	6.13777	3.952e-17	3.02526e-14
ARID5B	1.40071	6.24681	2.39569e-05	0.00077802		NFKB2	0.620796	3.83609	0.00144351	0.021221		TOB2	-0.994689	6.58852	0.000680131	0.011681
JMJD1C	0.783812	5.5049	0.00088803	0.0144856		NT5C2	0.566844	6.84284	0.00348294	0.0421635		IQSEC1	-0.581779	6.29216	0.00063829	0.0111102
ANXA2P3	1.18525	2.16431	0.00111036	0.0170729		PDCD11	0.613865	4.52889	0.00102022	0.0161027		PLCL2	-1.00421	5.6974	7.83788e-08	5.79301e-06
SIRT1	1.01829	4.81535	3.64444e-05	0.00107596		ITPRIP	1.3099	3.48638	7.10593e-05	0.00186652		NR1D2	-1.49953	6.63151	4.59538e-14	1.69823e-11
DDX21	1.15101	5.95136	9.36619e-06	0.00034142		RBM20	1.28843	5.53018	3.71826e-10	5.38495e-08		ACVR2B	-0.780076	3.82249	0.000877922	0.0143644
TSPAN15	0.699428	3.4951	0.00267708	0.0350736		NRAP	1.09444	12.5061	1.64333e-06	8.0418e-05		POMGNT2	-0.579836	4.18356	0.00264474	0.0347775
SGPL1	-0.800947	3.7716	0.000115485	0.0027875		HSPA12A	0.886471	3.07739	0.000813493	0.0135586		PFKFB4	-0.956425	2.41987	0.000167079	0.0037776
CHST3	0.929401	4.42369	0.0040162	0.0472465		BAG3	1.37223	8.82598	0.000195658	0.00433237		SLC38A3	-1.82363	4.74751	8.67423e-11	1.45253e-08
P4HA1	0.93708	5.8771	0.000190484	0.00423531		NSMCE4A	0.867407	3.06043	0.000470294	0.00881144		DUSP7	-0.867823	4.55694	0.000102758	0.00255603
USP54	1.11877	6.97335	9.04873e-06	0.000332107		PLEKHA1	0.971607	5.0938	5.54067e-05	0.00152255		ASB14	-0.814939	5.24146	0.000890328	0.014501
PLAU	2.56314	3.90092	1.4027e-07	9.74981e-06		CHST15	1.17883	4.61147	0.000592087	0.0105405		PDZRN3	-0.999834	6.26145	0.000237811	0.00514873
DLG5	0.787534	5.42853	0.000617207	0.0108614		IFITM3	0.603397	5.23759	0.00392559	0.0463331		POPDC2	-0.760113	5.17417	0.000913975	0.0147739
ZMIZ1	0.733192	5.33361	0.000381255	0.00753857		DUSP8	1.45306	4.24339	3.16803e-10	4.65093e-08		OSBPL11	-0.548627	6.04257	0.00218759	0.0299801
CCSER2	0.615632	7.61542	0.000736978	0.0125567		WEE1	1.91759	4.54449	2.40613e-05	0.000779049		KLF15	-1.63505	5.80254	3.80078e-15	2.14384e-12
BMPR1A	0.758062	4.363	0.000137527	0.00323218		ADM	1.05573	2.67441	0.000674207	0.0116288		KY	-1.65727	4.64443	0.000238893	0.00516172
ANKRD1	5.27711	10.2977	7.07555e-13	2.29784e-10		AMPD3	2.75974	5.73364	2.27358e-14	9.61316e-12		EPHB1	-1.56748	2.68822	6.64431e-10	8.90088e-08
PCGF5	0.735621	6.1256	0.00112168	0.0172222		CTR9	0.666143	4.95325	0.000759824	0.0128845		RNF13	-0.605441	4.82699	0.000762567	0.0128903
38412	0.652797	4.95551	0.000860038	0.0141583		EIF4G2	0.630466	9.56454	0.00231255	0.0313734		SKIL	-0.69442	4.57835	0.00256472	0.0339754
LGI1	-0.881894	2.36964	0.00193838	0.0271906		ZBED5	0.660712	5.16347	0.000653105	0.0113258		MAP6D1	-0.756137	4.45476	0.000894308	0.0145437
SORBS1	0.843487	8.89793	4.93398e-06	0.000209002		ARNTL	2.27192	3.42582	3.69601e-14	1.41465e-11		USP46	-0.578208	4.72897	0.00301943	0.0383858
RRP12	1.42005	5.60715	9.14618e-08	6.53464e-06		RRAS2	1.79175	5.20594	4.57859e-11	7.91431e-09		PITX2	-0.783895	5.4193	0.000273026	0.00577125
DNMBP	1.22538	4.67694	5.24271e-05	0.00145938		CSRP3	1.53252	10.4365	2.46016e-05	0.000791757		RNF150	-0.756743	4.38038	0.0028318	0.0366277
SCD	3.40811	6.18374	0.000644626	0.0111968		FBXO3	0.866159	6.78341	0.000124582	0.00295385		GAB1	-1.39864	5.05218	7.39633e-08	5.62174e-06
FAM178A	-0.631998	5.34178	0.00030866	0.00641068		CD44	1.13987	4.99312	0.000838543	0.0138481		NR3C2	-0.777901	4.70212	2.9221e-05	0.000899891
C10orf2	0.994721	3.80122	0.000829313	0.0137369		C11orf96	2.27861	3.76889	4.72082e-07	2.70551e-05		ING2	-1.08708	2.73203	6.55674e-05	0.00174797
LDB1	-0.65545	5.44596	0.000717049	0.0122954		TNKS1BP1	0.747863	5.4601	0.000373481	0.00742859		LRRC14B	-1.03593	5.92108	2.1329e-05	0.000701175
PPRC1	1.84504	4.72032	8.11542e-08	5.91653e-06		STX3	0.863296	2.95639	0.000579454	0.01035		NNT-AS1	-0.744686	4.75645	0.000242171	0.00521153
PITX3	-1.40087	3.55681	9.17094e-06	0.000335444		FADS3	1.19938	4.05967	1.42377e-07	9.78112e-06		NREP	-0.545014	6.04321	0.00365607	0.0436326
NFKB2	0.620796	3.83609	0.00144351	0.021221		SLC3A2	0.533305	4.8274	0.00287924	0.0371322		AC010226.4	-0.842872	1.94132	0.00174232	0.0248303
SUFU	-0.788273	3.46307	0.00129203	0.0192851		FRMD8	0.933044	2.88243	0.00031845	0.00651304		CTXN3	-1.22606	2.91671	0.00307318	0.038793
WBP1L	-0.789232	5.43627	0.000264143	0.00562751		MALAT1	1.11168	7.24196	0.000124863	0.00295398		SLC12A2	-1.20891	5.05883	4.22094e-12	9.62465e-10
NT5C2	0.566844	6.84284	0.00348294	0.0421635		CD248	1.34305	4.4864	0.0023435	0.0316313		AFAP1L1	-0.651583	5.41964	0.00306013	0.0387099
PDCD11	0.613865	4.52889	0.00102022	0.0161027		CPT1A	0.895701	3.58617	0.00132722	0.0196734		ARHGEF37	-1.03979	5.21341	4.59347e-05	0.00130234
ITPRIP	1.3099	3.48638	7.10593e-05	0.00186652		RELT	1.17926	4.46776	0.00040819	0.00793933		TRIM7	-0.70904	7.20692	0.000140526	0.00328824
RBM20	1.28843	5.53018	3.71826e-10	5.38495e-08		LRRC32	0.873243	4.38984	0.0013323	0.0197214		DTNBP1	-0.61945	3.2245	0.00407057	0.047729
NRAP	1.09444	12.5061	1.64333e-06	8.0418e-05		PICALM	0.621402	6.40868	0.000448474	0.0084618		FANCE	-0.75326	3.48449	0.00104439	0.0163636
HSPA12A	0.886471	3.07739	0.000813493	0.0135586		PANX1	1.55886	6.09595	1.10616e-05	0.000391246		FKBP5	-0.87563	7.63904	0.0031537	0.0392091
BAG3	1.37223	8.82598	0.000195658	0.00433237		AMOTL1	0.838242	7.77003	6.71562e-05	0.00177707		TFEB	-0.67656	5.82197	0.000286386	0.00601804
NSMCE4A	0.867407	3.06043	0.000470294	0.00881144		SRSF8	0.6859	4.93425	2.66659e-05	0.00083561		PRPH2	-1.12158	4.11873	0.00044111	0.00838187
PLEKHA1	0.971607	5.0938	5.54067e-05	0.00152255		ENDOD1	1.16839	7.40737	3.20041e-11	5.62275e-09		ENPP5	-1.1938	3.44887	0.00015316	0.00352993
CHST15	1.17883	4.61147	0.000592087	0.0105405		SIK2	1.30598	4.92186	1.4554e-09	1.64184e-07		C6orf203	-0.688749	3.74116	0.000871742	0.0143289
IFITM3	0.603397	5.23759	0.00392559	0.0463331		PPP2R1B	1.25117	3.77971	2.87747e-05	0.000888698		FOXO3	-1.55016	6.3601	1.93818e-12	4.97089e-10
DUSP8	1.45306	4.24339	3.16803e-10	4.65093e-08		CRYAB	1.38479	11.2043	3.6071e-06	0.000161746		SESN1	-1.07836	7.6899	8.93041e-06	0.000330025
LOC102724536	-0.83341	5.27872	7.24886e-05	0.00189017		IL18	2.01307	2.77368	4.31886e-05	0.00124089		CEP85L	-0.592965	4.17916	0.00344273	0.0420225
ART1	-0.788552	5.31565	0.00137731	0.0203595		USP28	1.65396	7.12196	1.5173e-12	4.2792e-10		ARHGAP18	-0.774266	3.9029	0.000369388	0.0073857
CHRNA10	-0.768974	5.32735	0.00308745	0.0388333		NNMT	1.93503	4.38447	2.41678e-05	0.000780139		FAM220A	-0.784937	6.24972	7.19361e-06	0.000284462
WEE1	1.91759	4.54449	2.40613e-05	0.000779049		SIK3	0.658599	5.38289	8.35366e-05	0.00213666		HOXA11	-0.964032	2.51799	0.00335271	0.041064
ADM	1.05573	2.67441	0.000674207	0.0116288		OAF	0.841884	3.94917	0.00334395	0.0410035		ASB4	-0.670295	5.42332	0.00240221	0.0322755
AMPD3	2.75974	5.73364	2.27358e-14	9.61316e-12		ARHGEF12	1.43127	7.38566	2.52234e-14	1.00118e-11		ACHE	-0.791396	7.15152	0.000422637	0.00811721
CTR9	0.666143	4.95325	0.000759824	0.0128845		SCN3B	1.32222	4.26135	3.76185e-06	0.000166594		ASB10	-0.590091	6.01475	0.00347291	0.0421608
EIF4G2	0.630466	9.56454	0.00231255	0.0313734		ROBO4	0.653325	4.3478	0.00262931	0.0346172		ANK1	-0.627925	8.81374	0.00230839	0.0313734
ZBED5	0.660712	5.16347	0.000653105	0.0113258		NOP2	0.688582	4.14956	0.00036443	0.00730017		PDP1	-1.15268	5.52901	1.00298e-05	0.000359496
ARNTL	2.27192	3.42582	3.69601e-14	1.41465e-11		LPCAT3	0.736679	5.14387	0.000189759	0.00422795		ANGPT1	-1.50155	4.95903	7.43615e-10	9.83867e-08
RRAS2	1.79175	5.20594	4.57859e-11	7.91431e-09		RIMKLB	1.16022	4.13492	4.08928e-06	0.000178877		KLHL38	-0.926232	7.31212	0.000778594	0.0130787
CSRP3	1.53252	10.4365	2.46016e-05	0.000791757		CLEC2B	1.30295	3.37879	2.95816e-05	0.00090752		THEM6	-0.640298	3.80498	0.00342069	0.0418487
FBXO3	0.866159	6.78341	0.000124582	0.00295385		GABARAPL1	1.37071	6.821	5.40904e-09	5.31823e-07		ZNF252P	-0.793176	4.79798	4.28415e-06	0.000185437
CD44	1.13987	4.99312	0.000838543	0.0138481		DUSP16	0.641248	4.96947	0.00115346	0.0175708		ERMP1	-0.622033	4.10002	0.00104878	0.0163846
C11orf96	2.27861	3.76889	4.72082e-07	2.70551e-05		RASSF8	1.38833	6.11696	1.43792e-06	7.16753e-05		MOB3B	-1.02912	2.97482	0.000499195	0.00922393
TNKS1BP1	0.747863	5.4601	0.000373481	0.00742859		KIF21A	0.724286	4.74455	0.00331493	0.0407877		APBA1	-1.17616	2.54064	1.80215e-05	0.000603551
STX3	0.863296	2.95639	0.000579454	0.01035		TUBA1C	1.15937	5.35955	0.000605849	0.0106967		KLF9	-0.865026	7.30396	2.53541e-06	0.000118139
FADS3	1.19938	4.05967	1.42377e-07	9.78112e-06		LARP4	0.644338	5.59935	0.00107338	0.01672		TLE1	-0.77058	6.08382	0.00198401	0.0277579
SLC3A2	0.533305	4.8274	0.00287924	0.0371322		ATF1	1.13531	5.03653	4.51637e-08	3.63925e-06		RMI1	-0.753016	2.11231	0.00283329	0.0366277
FRMD8	0.933044	2.88243	0.00031845	0.00651304		CSRNP2	0.742413	4.63568	0.000290811	0.00608715		MVB12B	-0.728602	5.51053	6.97955e-05	0.00183783
MALAT1	1.11168	7.24196	0.000124863	0.00295398		CDK4	0.620015	4.49883	0.00429557	0.0499302		SLC25A25	-1.19867	5.27031	0.000234653	0.00511134
CD248	1.34305	4.4864	0.0023435	0.0316313		METTL1	1.69457	2.31138	4.91708e-08	3.87473e-06		FAM78A	-1.18356	5.89485	7.34752e-09	7.09399e-07
B3GNT1	-0.667156	4.35017	0.000774581	0.0130317		RAP1B	0.6	4.00254	0.00277436	0.0360398		PPAPDC3	-0.842663	7.36333	0.000202104	0.00446586
SLC29A2	-0.747165	6.1525	7.67059e-05	0.00198565		MDM2	0.857573	5.65682	1.37925e-06	6.93965e-05		REXO4	-0.542475	4.60451	0.00251982	0.0335465
PELI3	-0.816744	3.54724	0.00019487	0.00432385		ZFC3H1	0.765597	4.18443	0.00205515	0.028497		AMER1	-0.85252	2.84068	0.00163533	0.0234303
CPT1A	0.895701	3.58617	0.00132722	0.0196734		RAB21	0.830263	6.28174	0.000244428	0.00524956		AR	-0.554655	5.27054	0.00232472	0.0314572
RELT	1.17926	4.46776	0.00040819	0.00793933		TBC1D15	0.82604	4.8558	4.49534e-06	0.00019348		TSC22D3	-1.13016	6.65418	2.38201e-07	1.53484e-05
LRRC32	0.873243	4.38984	0.0013323	0.0197214		PHLDA1	3.96633	4.35976	1.21303e-14	5.41668e-12		TMEM164	-0.96633	4.69826	9.83835e-07	5.1433e-05
PICALM	0.621402	6.40868	0.000448474	0.0084618		OSBPL8	2.67151	5.52666	2.32666e-20	3.11685e-17		TMEM187	-1.0799	1.97498	0.000265176	0.00562751
PANX1	1.55886	6.09595	1.10616e-05	0.000391246		ZDHHC17	0.595743	4.60751	0.000920251	0.0148306
AMOTL1	0.838242	7.77003	6.71562e-05	0.00177707		MYF6	0.999753	8.20203	1.30036e-05	0.000452464
SRSF8	0.6859	4.93425	2.66659e-05	0.00083561		ACSS3	0.966605	3.21886	0.000116753	0.00281178
ENDOD1	1.16839	7.40737	3.20041e-11	5.62275e-09		DUSP6	1.18416	3.49782	0.000379962	0.0075269
SIK2	1.30598	4.92186	1.4554e-09	1.64184e-07		ATP2B1	0.856977	5.26479	4.70991e-06	0.000200699
PPP2R1B	1.25117	3.77971	2.87747e-05	0.000888698		BTG1	0.798691	4.63229	0.000315237	0.00648788
CRYAB	1.38479	11.2043	3.6071e-06	0.000161746		NUDT4	2.65583	7.73331	2.37412e-09	2.54435e-07
DIXDC1	-1.11906	4.95521	3.97283e-07	2.31396e-05		CDK17	0.6409	3.60474	0.00160251	0.0231146
IL18	2.01307	2.77368	4.31886e-05	0.00124089		NT5DC3	1.46644	4.09908	1.42245e-06	7.12357e-05
NCAM1	-1.16434	4.25435	0.00275378	0.0358158		C12orf23	0.646743	4.00496	0.00326168	0.0402713
USP28	1.65396	7.12196	1.5173e-12	4.2792e-10		MTERFD3	0.680051	3.10217	0.00332183	0.0408257
NNMT	1.93503	4.38447	2.41678e-05	0.000780139		CRY1	1.73793	4.31396	7.69545e-10	9.9364e-08
SIK3	0.658599	5.38289	8.35366e-05	0.00213666		CORO1C	1.55046	5.09165	5.43288e-06	0.000226553
SCN2B	-1.41414	3.67669	0.000206579	0.004546		ANKRD13A	0.845159	3.82915	0.00361642	0.0433041
OAF	0.841884	3.94917	0.00334395	0.0410035		PPTC7	0.940308	6.90602	2.08731e-05	0.000690422
ARHGEF12	1.43127	7.38566	2.52234e-14	1.00118e-11		SH2B3	1.16284	4.30495	7.80045e-07	4.26517e-05
SCN3B	1.32222	4.26135	3.76185e-06	0.000166594		NAA25	0.696942	5.08944	0.000478608	0.00892043
ROBO4	0.653325	4.3478	0.00262931	0.0346172		TRAFD1	1.84794	4.33013	1.44876e-06	7.18812e-05
NOP2	0.688582	4.14956	0.00036443	0.00730017		TBX3	1.24958	4.23054	2.96382e-05	0.00090752
LPCAT3	0.736679	5.14387	0.000189759	0.00422795		HSPB8	1.88276	10.4654	2.57676e-07	1.60553e-05
RIMKLB	1.16022	4.13492	4.08928e-06	0.000178877		RNF34	1.23097	5.9585	1.51917e-10	2.39425e-08
CLEC2B	1.30295	3.37879	2.95816e-05	0.00090752		CLIP1	1.1044	8.88281	1.7523e-06	8.42128e-05
GABARAPL1	1.37071	6.821	5.40904e-09	5.31823e-07		USP12	1.03528	4.54965	0.000454392	0.00855838
DUSP16	0.641248	4.96947	0.00115346	0.0175708		SLC7A1	1.37081	2.72503	0.0019199	0.0269667
RASSF8	1.38833	6.11696	1.43792e-06	7.16753e-05		STARD13	1.45321	3.37706	4.51037e-08	3.63925e-06
BHLHE41	-0.949846	6.54677	9.57461e-05	0.00240307		ELF1	0.983179	4.25395	2.78607e-07	1.70619e-05
KIF21A	0.724286	4.74455	0.00331493	0.0407877		KLF5	2.08791	5.11769	2.52499e-05	0.000799523
TUBA1C	1.15937	5.35955	0.000605849	0.0106967		LIG4	0.948166	3.86417	0.00260122	0.0343316
LARP4	0.644338	5.59935	0.00107338	0.01672		IRS2	1.64977	6.16985	0.000223353	0.00487511
ATF1	1.13531	5.03653	4.51637e-08	3.63925e-06		COL4A1	0.992526	6.25528	1.85414e-05	0.00061903
CSRNP2	0.742413	4.63568	0.000290811	0.00608715		COL4A2	0.946104	6.14164	5.91289e-05	0.00160496
CDK4	0.620015	4.49883	0.00429557	0.0499302		LINC00346	1.62296	6.67303	6.23804e-09	6.07755e-07
METTL1	1.69457	2.31138	4.91708e-08	3.87473e-06		LOC101928841	4.5985	9.95537	1.4558e-11	3.00034e-09
RAP1B	0.6	4.00254	0.00277436	0.0360398		G2E3	1.01369	2.54322	8.47781e-05	0.0021536
MDM2	0.857573	5.65682	1.37925e-06	6.93965e-05		EGLN3	1.84659	4.27922	1.78595e-09	1.99376e-07
LGR5	-1.10622	4.9881	4.63733e-06	0.000198793		SPTSSA	1.18567	4.43339	3.68108e-07	2.16759e-05
ZFC3H1	0.765597	4.18443	0.00205515	0.028497		BAZ1A	1.4698	3.62233	7.79318e-09	7.3911e-07
RAB21	0.830263	6.28174	0.000244428	0.00524956		FAM177A1	0.622814	4.26825	0.000732109	0.0124937
TBC1D15	0.82604	4.8558	4.49534e-06	0.00019348		RALGAPA1	0.761621	4.57472	5.49327e-05	0.0015134
PHLDA1	3.96633	4.35976	1.21303e-14	5.41668e-12		NID2	0.801801	3.11025	0.00043692	0.0083318
OSBPL8	2.67151	5.52666	2.32666e-20	3.11685e-17		ERO1L	1.41842	3.47431	4.1039e-07	2.37738e-05
ZDHHC17	0.595743	4.60751	0.000920251	0.0148306		SAMD4A	0.873071	7.94367	6.36413e-05	0.00170511
MYF6	0.999753	8.20203	1.30036e-05	0.000452464		MAPK1IP1L	0.588044	4.91111	0.000245701	0.00526635
ACSS3	0.966605	3.21886	0.000116753	0.00281178		ATG14	0.792299	5.20705	0.000108927	0.00267281
DUSP6	1.18416	3.49782	0.000379962	0.0075269		RAB15	3.17543	5.03612	1.17632e-09	1.37028e-07
ATP2B1	0.856977	5.26479	4.70991e-06	0.000200699		ZFP36L1	0.67655	5.76136	0.000969075	0.0155009
BTG1	0.798691	4.63229	0.000315237	0.00648788		ACTN1	0.976953	4.24771	0.000443932	0.00839087
NUDT4	2.65583	7.73331	2.37412e-09	2.54435e-07		KIAA0247	1.16323	4.53348	4.09268e-05	0.00118544
CDK17	0.6409	3.60474	0.00160251	0.0231146		SRSF5	0.792441	6.15304	0.000108787	0.00267281
NT5DC3	1.46644	4.09908	1.42245e-06	7.12357e-05		MAP3K9	0.784602	1.92459	0.00301187	0.0383351
C12orf23	0.646743	4.00496	0.00326168	0.0402713		FOS	3.60252	5.91889	1.71282e-06	8.30601e-05
MTERFD3	0.680051	3.10217	0.00332183	0.0408257		IRF2BPL	0.821332	4.58703	0.000420812	0.00809667
CRY1	1.73793	4.31396	7.69545e-10	9.9364e-08		FLRT2	0.683706	5.29423	0.00354124	0.0426421
CORO1C	1.55046	5.09165	5.43288e-06	0.000226553		UBR7	0.713711	4.84658	0.00115422	0.0175708
ANKRD13A	0.845159	3.82915	0.00361642	0.0433041		C14orf132	1.16762	2.82056	0.000975001	0.0155724
PPTC7	0.940308	6.90602	2.08731e-05	0.000690422		WARS	0.606927	6.29406	0.000764502	0.0128938
SH2B3	1.16284	4.30495	7.80045e-07	4.26517e-05		CEP170B	1.05474	3.30187	9.66009e-06	0.000348577
NAA25	0.696942	5.08944	0.000478608	0.00892043		CYFIP1	0.544257	4.70405	0.0031434	0.039187
TRAFD1	1.84794	4.33013	1.44876e-06	7.18812e-05		TJP1	0.674661	5.2446	7.60983e-05	0.00197469
TPCN1	-0.533256	5.59364	0.00176177	0.0250742		ACTC1	2.94927	8.29895	6.35449e-08	4.89936e-06
TBX3	1.24958	4.23054	2.96382e-05	0.00090752		SPRED1	0.79754	3.18851	0.00306299	0.0387099
VSIG10	-1.14935	4.75201	8.01024e-08	5.87984e-06		THBS1	3.49702	5.33969	8.41333e-06	0.000313075
HSPB8	1.88276	10.4654	2.57676e-07	1.60553e-05		BLOC1S6	0.847133	5.43803	0.000818229	0.0136164
MLEC	-0.608086	7.1709	0.000931743	0.0149483		SEMA6D	1.5072	4.89852	0.000601677	0.0106406
RNF34	1.23097	5.9585	1.51917e-10	2.39425e-08		GABPB1	1.34565	2.72811	2.02364e-06	9.59616e-05
CLIP1	1.1044	8.88281	1.7523e-06	8.42128e-05		TRPM7	0.748492	4.53456	3.20848e-05	0.000968598
SGCG	-0.599362	6.49191	0.00348575	0.0421635		SPPL2A	0.722626	5.57015	0.000171834	0.00387694
USP12	1.03528	4.54965	0.000454392	0.00855838		ARPP19	0.891124	7.67752	0.000922032	0.014837
SLC7A1	1.37081	2.72503	0.0019199	0.0269667		NEDD4	1.13549	7.74193	8.98693e-07	4.79169e-05
STARD13	1.45321	3.37706	4.51037e-08	3.63925e-06		MYO1E	0.655163	3.34129	0.00292073	0.0375318
ELF1	0.983179	4.25395	2.78607e-07	1.70619e-05		ANXA2	1.13046	5.57229	0.0001357	0.00320329
TSC22D1	-0.605432	7.6325	0.00309086	0.0388333		PLEKHO2	0.966029	3.02573	0.00215389	0.0296319
KLF5	2.08791	5.11769	2.52499e-05	0.000799523		FEM1B	0.738424	5.91819	0.000472469	0.00883674
LIG4	0.948166	3.86417	0.00260122	0.0343316		CSPG4	1.11753	5.08907	3.694e-05	0.0010876
IRS2	1.64977	6.16985	0.000223353	0.00487511		DNAJA4	2.26898	8.40081	2.10755e-09	2.32852e-07
COL4A1	0.992526	6.25528	1.85414e-05	0.00061903		HOMER2	0.587253	7.00393	0.00384371	0.045467
COL4A2	0.946104	6.14164	5.91289e-05	0.00160496		ALPK3	1.38356	10.0415	3.2267e-12	7.8592e-10
LINC00346	1.62296	6.67303	6.23804e-09	6.07755e-07		AEN	2.41604	4.15414	9.85005e-09	9.02247e-07
LOC101928841	4.5985	9.95537	1.4558e-11	3.00034e-09		MFGE8	0.688819	6.75777	0.00148228	0.0217017
KLHL33	-1.02878	6.19859	7.51915e-06	0.000288827		LOC102724554	1.12807	4.06427	4.83121e-05	0.0013554
SLC7A8	-0.875025	3.63176	0.000758473	0.012882		ABHD2	2.5503	6.62908	3.64706e-19	3.94683e-16
G2E3	1.01369	2.54322	8.47781e-05	0.0021536		ZNF774	2.41111	3.187	7.63687e-10	9.9364e-08
EGLN3	1.84659	4.27922	1.78595e-09	1.99376e-07		GABARAPL3	1.58866	2.28582	4.85148e-07	2.76267e-05
SPTSSA	1.18567	4.43339	3.68108e-07	2.16759e-05		IQGAP1	0.79892	5.50372	8.48015e-05	0.0021536
BAZ1A	1.4698	3.62233	7.79318e-09	7.3911e-07		CHD2	0.797469	6.61662	0.000491802	0.00911876
FAM177A1	0.622814	4.26825	0.000732109	0.0124937		ARRDC4	2.07766	4.94895	2.7025e-06	0.000125379
NFKBIA	-1.24895	5.39604	5.14166e-06	0.000216942		ALDH1A3	1.53486	3.76945	1.81962e-06	8.66705e-05
RALGAPA1	0.761621	4.57472	5.49327e-05	0.0015134		CHSY1	1.16372	3.03816	9.85527e-05	0.00246773
CTAGE5	-0.906445	5.05236	6.27942e-06	0.000252995		TNFRSF12A	4.3609	6.3182	2.99283e-22	8.01855e-19
NID2	0.801801	3.11025	0.00043692	0.0083318		THOC6	1.56673	3.45857	9.00238e-09	8.36163e-07
ERO1L	1.41842	3.47431	4.1039e-07	2.37738e-05		VASN	1.45224	2.67931	2.14089e-05	0.00070165
SAMD4A	0.873071	7.94367	6.36413e-05	0.00170511		LITAF	0.764393	4.70734	0.0012737	0.0190912
MAPK1IP1L	0.588044	4.91111	0.000245701	0.00526635		SNN	1.05571	6.26279	3.81288e-05	0.00111646
ATG14	0.792299	5.20705	0.000108927	0.00267281		ABCC1	0.627287	5.19798	0.00149796	0.0218417
SIX1	-0.882806	6.88286	0.000489148	0.00910104		SMG1	0.687256	7.46368	0.00131735	0.0195812
RAB15	3.17543	5.03612	1.17632e-09	1.37028e-07		NPIPB3	0.897705	4.25212	5.88474e-05	0.00160475
ARG2	-1.30391	4.11558	0.000877746	0.0143644		LOC100271836	0.940586	3.56201	0.000180725	0.00405194
ZFP36L1	0.67655	5.76136	0.000969075	0.0155009		NPIPB4	0.806577	4.22019	0.000875185	0.0143635
ACTN1	0.976953	4.24771	0.000443932	0.00839087		CDR2	0.890645	1.88371	0.00299614	0.0382322
EXD2	-0.633375	3.96361	0.00347373	0.0421608		RRN3P3	0.839743	1.71019	0.00108686	0.0168566
KIAA0247	1.16323	4.53348	4.09268e-05	0.00118544		SMG1P1	0.872736	3.9904	0.000824193	0.0136944
SRSF5	0.792441	6.15304	0.000108787	0.00267281		NPIPB5	0.925367	4.46691	5.67988e-06	0.000235024
SMOC1	-0.822864	4.09595	0.00200484	0.0280129		ARHGAP17	1.24332	5.10208	1.29561e-12	3.85695e-10
MAP3K9	0.784602	1.92459	0.00301187	0.0383351		NPIPB11	0.7772	3.58855	0.00124218	0.0187764
FOS	3.60252	5.91889	1.71282e-06	8.30601e-05		LOC613037	0.876631	4.01256	0.000357205	0.00716884
JDP2	-0.745611	3.68603	0.00330288	0.040733		FUS	0.489345	6.08869	0.00364414	0.0435387
IRF2BPL	0.821332	4.58703	0.000420812	0.00809667		CYLD	1.19651	6.16418	1.79844e-05	0.000603551
STON2	-0.904533	3.98389	0.00126724	0.0190477		KIFC3	1.09333	2.9003	0.000332198	0.00675553
FLRT2	0.683706	5.29423	0.00354124	0.0426421		RRAD	2.72328	8.57926	2.96431e-08	2.50146e-06
UBR7	0.713711	4.84658	0.00115422	0.0175708		CES3	0.954516	3.84626	0.000404866	0.00790336
C14orf132	1.16762	2.82056	0.000975001	0.0155724		NFAT5	1.32763	5.06263	4.43244e-09	4.43948e-07
WARS	0.606927	6.29406	0.000764502	0.0128938		NOB1	0.606217	3.66311	0.00359515	0.0431437
CEP170B	1.05474	3.30187	9.66009e-06	0.000348577		PHLPP2	1.16822	2.3228	3.47116e-05	0.00103334
CYFIP1	0.544257	4.70405	0.0031434	0.039187		BCAR1	0.702989	5.81391	0.000205924	0.00454092
TJP1	0.674661	5.2446	7.60983e-05	0.00197469		CENPN	1.64428	2.62728	1.15504e-06	5.98e-05
KLF13	-1.00208	6.50225	8.76828e-07	4.69848e-05		CMIP	1.25913	2.21708	0.00062318	0.010918
ACTC1	2.94927	8.29895	6.35449e-08	4.89936e-06		FAM101B	0.850249	4.08873	8.29692e-05	0.00212723
SPRED1	0.79754	3.18851	0.00306299	0.0387099		DHX33	0.819482	3.78452	0.000117882	0.00282626
THBS1	3.49702	5.33969	8.41333e-06	0.000313075		POLR2A	0.890124	6.26144	2.78166e-06	0.000127398
BLOC1S6	0.847133	5.43803	0.000818229	0.0136164		CD68	1.09814	2.75756	0.00217213	0.0298063
SEMA6D	1.5072	4.89852	0.000601677	0.0106406		TP53	0.991414	2.8928	0.000146394	0.00341065
GABPB1	1.34565	2.72811	2.02364e-06	9.59616e-05		ARHGEF15	0.833473	3.73724	0.00102325	0.0161267
TRPM7	0.748492	4.53456	3.20848e-05	0.000968598		MIEF2	0.588405	5.83	0.00397169	0.0467742
SPPL2A	0.722626	5.57015	0.000171834	0.00387694		C17orf103	0.528686	6.85283	0.0040458	0.047505
ARPP19	0.891124	7.67752	0.000922032	0.014837		MAP2K3	0.946835	7.28199	0.00059139	0.0105405
NEDD4	1.13549	7.74193	8.98693e-07	4.79169e-05		LOC100996792	0.984687	2.00633	0.00214784	0.0295866
MYO1E	0.655163	3.34129	0.00292073	0.0375318		ZNF207	0.509483	5.69962	0.00287743	0.0371322
ANXA2	1.13046	5.57229	0.0001357	0.00320329		DUSP14	1.57806	3.4632	2.39757e-06	0.000112204
PLEKHO2	0.966029	3.02573	0.00215389	0.0296319		SOCS7	1.1957	5.5229	6.51105e-12	1.39558e-09
RASL12	-0.807307	4.46551	2.65721e-05	0.000835111		ARHGAP23	0.749297	4.08548	0.00238992	0.0321768
KBTBD13	-0.875055	4.94355	0.00255316	0.03389		RARA	1.29136	4.53724	6.4522e-06	0.000258982
FEM1B	0.738424	5.91819	0.000472469	0.00883674		MAP3K14	1.84883	5.02504	3.68277e-19	3.94683e-16
NEO1	-0.500146	5.98417	0.00416599	0.048635		SPAG9	0.566577	7.07155	0.00255511	0.03389
CSPG4	1.11753	5.08907	3.694e-05	0.0010876		RNFT1	0.699078	2.78946	0.00303784	0.038574
NRG4	-0.939312	2.49705	0.00359441	0.0431437		DDX5	1.00631	7.54104	5.98812e-06	0.000243086
DNAJA4	2.26898	8.40081	2.10755e-09	2.32852e-07		SMURF2	0.763846	3.93172	0.00184479	0.0260691
HOMER2	0.587253	7.00393	0.00384371	0.045467		PSMD12	0.763203	4.77181	0.000315404	0.00648788
ALPK3	1.38356	10.0415	3.2267e-12	7.8592e-10		KPNA2	1.72337	2.85731	0.00011766	0.00282626
AEN	2.41604	4.15414	9.85005e-09	9.02247e-07		ABCA5	0.735586	6.31165	0.00270792	0.0354344
MFGE8	0.688819	6.75777	0.00148228	0.0217017		PPP1R27	2.24512	8.88121	6.19355e-11	1.05359e-08
LOC102724554	1.12807	4.06427	4.83121e-05	0.0013554		FASN	1.92818	5.26885	0.0005576	0.0100943
ABHD2	2.5503	6.62908	3.64706e-19	3.94683e-16		METRNL	1.21974	2.45101	0.000599201	0.0106143
ZNF774	2.41111	3.187	7.63687e-10	9.9364e-08		YES1	0.740808	4.0609	0.000904077	0.0146581
GABARAPL3	1.58866	2.28582	4.85148e-07	2.76267e-05		MYL12A	0.83932	10.2956	0.00220458	0.0301744
IQGAP1	0.79892	5.50372	8.48015e-05	0.0021536		TGIF1	0.989059	2.49967	0.000903557	0.0146581
CHD2	0.797469	6.61662	0.000491802	0.00911876		SEH1L	0.71126	4.479	0.00224628	0.0306667
ARRDC4	2.07766	4.94895	2.7025e-06	0.000125379		ABHD3	1.10946	2.8261	0.000425157	0.00815099
ALDH1A3	1.53486	3.76945	1.81962e-06	8.66705e-05		MIB1	0.741193	4.55166	0.000524899	0.00959956
CHSY1	1.16372	3.03816	9.85527e-05	0.00246773		GAREM	1.68173	3.84173	7.53352e-08	5.64593e-06
RPUSD1	-0.678204	3.06228	0.00310706	0.0389		MAPRE2	1.19617	6.52457	2.07006e-07	1.36103e-05
PAQR4	-0.745087	3.98409	0.000281675	0.00593068		ZNF532	0.487798	6.40403	0.00288353	0.0371428
TNFRSF12A	4.3609	6.3182	2.99283e-22	8.01855e-19		DSEL	1.4711	2.27227	3.69304e-06	0.000164225
THOC6	1.56673	3.45857	9.00238e-09	8.36163e-07		SOCS6	1.19054	5.67635	2.74232e-06	0.000126135
VASN	1.45224	2.67931	2.14089e-05	0.00070165		ZNF516	0.596786	4.55176	0.00149537	0.0218336
SEC14L5	-1.39711	3.48889	0.00125313	0.0189153		MIDN	1.54114	7.04118	0.0011516	0.0175708
LITAF	0.764393	4.70734	0.0012737	0.0190912		DOT1L	1.86402	5.14167	2.10242e-08	1.78823e-06
SNN	1.05571	6.26279	3.81288e-05	0.00111646		GADD45B	3.35994	4.64705	1.53028e-07	1.03798e-05
ABCC1	0.627287	5.19798	0.00149796	0.0218417		DAPK3	0.931485	5.63233	2.29729e-07	1.49212e-05
SMG1	0.687256	7.46368	0.00131735	0.0195812		SEMA6B	1.38851	3.12293	2.26916e-06	0.00010666
IQCK	-0.638104	3.52612	0.00147628	0.0216434		COL5A3	1.08605	4.42666	0.000113834	0.00276423
NPIPB3	0.897705	4.25212	5.88474e-05	0.00160475		ICAM1	1.48165	3.71078	0.00209272	0.0289764
LOC100271836	0.940586	3.56201	0.000180725	0.00405194		CNN1	3.58104	4.96194	4.41554e-17	3.15475e-14
NPIPB4	0.806577	4.22019	0.000875185	0.0143635		JUNB	2.48027	4.93542	7.65469e-06	0.000291328
CDR2	0.890645	1.88371	0.00299614	0.0382322		TPM4	0.803519	5.0866	0.00221992	0.0303455
RRN3P3	0.839743	1.71019	0.00108686	0.0168566		JUND	0.9842	6.62742	5.33433e-05	0.00147721
SMG1P1	0.872736	3.9904	0.000824193	0.0136944		GATAD2A	1.09828	4.54382	2.89726e-07	1.75424e-05
NPIPB5	0.925367	4.46691	5.67988e-06	0.000235024		ZNF507	0.829888	4.6416	1.31187e-05	0.000454994
ARHGAP17	1.24332	5.10208	1.29561e-12	3.85695e-10		UBA2	0.658213	6.3988	0.000316288	0.00649359
SBK1	-1.13156	5.55446	2.95402e-11	5.27636e-09		ZNF146	0.660026	5.72967	6.3895e-05	0.00170764
NPIPB11	0.7772	3.58855	0.00124218	0.0187764		ZNF529	0.667498	3.24348	0.00368597	0.043843
PAGR1	-0.554169	4.75683	0.00170741	0.0243977		PLEKHG2	1.15792	2.73665	0.000138224	0.00324146
LOC613037	0.876631	4.01256	0.000357205	0.00716884		SERTAD1	1.5167	3.8675	0.00103131	0.0162299
FUS	0.489345	6.08869	0.00364414	0.0435387		LIPE	2.23582	4.66603	0.00114584	0.0175428
CNEP1R1	-0.692382	3.52399	0.00191185	0.0268888		PVR	2.17144	5.44025	1.25568e-09	1.43161e-07
CYLD	1.19651	6.16418	1.79844e-05	0.000603551		BCL3	2.01982	3.23891	6.34567e-07	3.48751e-05
MT1X	-0.928431	6.5511	0.00266802	0.0350406		RELB	0.84168	2.55869	0.000674919	0.0116288
KIFC3	1.09333	2.9003	0.000332198	0.00675553		GRWD1	0.896526	4.5646	5.94117e-06	0.000242097
RRAD	2.72328	8.57926	2.96431e-08	2.50146e-06		ZNF274	0.724569	3.99372	0.000124503	0.00295385
CES3	0.954516	3.84626	0.000404866	0.00790336		PXDN	1.02888	4.08522	0.00348023	0.0421635
NFATC3	-0.532783	5.33833	0.00165589	0.0236932		YWHAQ	0.961916	5.33639	2.51635e-05	0.000799523
NFAT5	1.32763	5.06263	4.43244e-09	4.43948e-07		KLF11	1.23788	4.37229	4.1694e-08	3.41095e-06
NOB1	0.606217	3.66311	0.00359515	0.0431437		KLHL29	1.64352	3.02259	1.90538e-07	1.26832e-05
PHLPP2	1.16822	2.3228	3.47116e-05	0.00103334		ITSN2	0.645106	4.12199	0.000566465	0.0101859
BCAR1	0.702989	5.81391	0.000205924	0.00454092		EPT1	0.893265	3.69805	0.000439526	0.0083666
CENPN	1.64428	2.62728	1.15504e-06	5.98e-05		WDR43	1.2627	4.91826	7.03684e-06	0.000279311
CMIP	1.25913	2.21708	0.00062318	0.010918		CRIM1	1.38519	6.97538	1.48329e-12	4.2792e-10
OSGIN1	-1.16127	3.42138	0.000721472	0.0123515		STRN	0.76385	5.13883	0.00104705	0.0163814
FAM101B	0.850249	4.08873	8.29692e-05	0.00212723		CYP1B1	2.26173	3.47858	2.60979e-07	1.61671e-05
ABR	-0.691245	4.91216	0.001075	0.016721		SRSF7	0.943595	5.16709	1.37199e-06	6.93568e-05
DHX33	0.819482	3.78452	0.000117882	0.00282626		MAP4K3	0.648447	5.58654	4.67116e-05	0.00132087
WSCD1	-0.913855	4.68499	0.000413475	0.00801308		PPM1B	0.503552	7.08158	0.00178251	0.0253021
SLC2A4	-0.633965	8.12809	0.00154935	0.0224384		PREPL	0.741974	5.58726	6.68369e-05	0.001773
POLR2A	0.890124	6.26144	2.78166e-06	0.000127398		PNO1	0.734779	3.55006	0.00363341	0.043459
CD68	1.09814	2.75756	0.00217213	0.0298063		AAK1	0.970074	4.00332	8.03221e-06	0.000302039
TP53	0.991414	2.8928	0.000146394	0.00341065		MXD1	1.51215	3.68198	3.06812e-05	0.000934121
PER1	-2.70546	6.96863	4.64477e-18	4.14817e-15		TET3	1.40459	2.61784	0.000435008	0.00832497
ARHGEF15	0.833473	3.73724	0.00102325	0.0161267		LOC100996506	1.01841	1.67891	0.00307744	0.0388011
MIEF2	0.588405	5.83	0.00397169	0.0467742		MAT2A	0.934517	6.79395	0.000317699	0.00651009
FOXO3B	-1.52222	4.87098	2.29379e-10	3.51179e-08		POLR1A	0.525798	4.36942	0.00411733	0.0482246
C17orf103	0.528686	6.85283	0.0040458	0.047505		RNF103	0.629311	5.10364	0.00100067	0.0158877
MAP2K3	0.946835	7.28199	0.00059139	0.0105405		EIF2AK3	2.08804	3.17819	2.46493e-11	4.55459e-09
LOC100996792	0.984687	2.00633	0.00214784	0.0295866		ARID5A	2.49569	5.9789	1.79666e-20	2.75069e-17
ZNF207	0.509483	5.69962	0.00287743	0.0371322		RNF149	1.77221	3.71754	1.55348e-05	0.00052853
DUSP14	1.57806	3.4632	2.39757e-06	0.000112204		IL1R1	3.35872	5.62647	1.9481e-12	4.97089e-10
SOCS7	1.1957	5.5229	6.51105e-12	1.39558e-09		FHL2	1.58875	6.18358	1.09164e-05	0.000387388
ARHGAP23	0.749297	4.08548	0.00238992	0.0321768		RGPD3	0.743555	3.04216	0.00370628	0.0440357
THRA	-0.711775	5.97205	1.72488e-05	0.000581308		LIMS1	1.59944	6.51418	3.68147e-08	3.03495e-06
RARA	1.29136	4.53724	6.4522e-06	0.000258982		RANBP2	0.81752	6.64488	8.6899e-05	0.00220165
MAP3K14	1.84883	5.02504	3.68277e-19	3.94683e-16		RGPD5	0.706926	4.13296	0.000533163	0.00970104
NSF	-0.718928	4.26467	0.00162016	0.0232439		LIMS3L	1.77452	3.80153	2.46048e-07	1.5603e-05
OSBPL7	-0.832695	3.77017	0.00395473	0.0466258		BCL2L11	0.744712	4.17953	0.000928175	0.0149134
CHAD	-1.78384	2.62171	2.52905e-05	0.000799523		NIFK	1.12558	3.38719	2.3842e-05	0.000776641
SPAG9	0.566577	7.07155	0.00255511	0.03389		UGGT1	0.673693	5.6475	9.51908e-05	0.00239474
HLF	-1.26675	3.77067	3.96982e-09	4.05186e-07		RND3	1.4468	3.4237	0.000102795	0.00255603
AKAP1	-0.560859	7.96413	0.00346683	0.0421608		LOC101929336	2.04199	2.66954	6.88936e-08	5.2738e-06
RNFT1	0.699078	2.78946	0.00303784	0.038574		FMNL2	1.3339	4.45191	7.90123e-07	4.29835e-05
CA4	-1.33236	2.38479	4.01015e-05	0.00116561		TANC1	0.988231	3.16235	1.37566e-05	0.00047102
DDX5	1.00631	7.54104	5.98812e-06	0.000243086		COBLL1	1.27687	3.04551	0.00116184	0.0176617
SMURF2	0.763846	3.93172	0.00184479	0.0260691		XIRP2	1.68604	12.5978	6.23052e-07	3.44188e-05
CACNG1	-0.808021	7.17807	9.15288e-05	0.00230803		CERS6	0.730256	3.20099	0.00420856	0.0490785
PSMD12	0.763203	4.77181	0.000315404	0.00648788		BBS5	0.763687	3.17901	0.00231268	0.0313734
KPNA2	1.72337	2.85731	0.00011766	0.00282626		ZNF385B	1.89488	4.64808	8.99396e-13	2.75395e-10
ABCA5	0.735586	6.31165	0.00270792	0.0354344		ITGAV	1.24562	6.19702	0.000265101	0.00562751
GPRC5C	-0.884648	5.30889	5.49132e-05	0.0015134		TFPI	1.19757	4.26901	5.92038e-05	0.00160496
PPP1R27	2.24512	8.88121	6.19355e-11	1.05359e-08		NAB1	0.983675	3.25029	0.000258962	0.00552849
FASN	1.92818	5.26885	0.0005576	0.0100943		SLC39A10	1.08998	1.90521	0.000111741	0.00272786
METRNL	1.21974	2.45101	0.000599201	0.0106143		STK17B	0.984374	2.05247	0.000416486	0.0080423
YES1	0.740808	4.0609	0.000904077	0.0146581		COQ10B	1.11765	3.30781	4.39204e-05	0.00125519
MYL12A	0.83932	10.2956	0.00220458	0.0301744		MARS2	1.02906	2.86021	0.000105766	0.00261778
TGIF1	0.989059	2.49967	0.000903557	0.0146581		SATB2	1.56441	2.50899	0.000625238	0.010931
GNAL	-1.05845	4.09702	7.43029e-06	0.000288516		C2orf69	0.756243	4.31269	0.000420109	0.00809667
SEH1L	0.71126	4.479	0.00224628	0.0306667		BZW1	1.18557	5.24379	1.95743e-05	0.000649468
ABHD3	1.10946	2.8261	0.000425157	0.00815099		NOP58	1.028	4.51409	5.24455e-07	2.92739e-05
MIB1	0.741193	4.55166	0.000524899	0.00959956		IGFBP2	0.957805	2.9774	0.000401448	0.00785094
AQP4	-0.990109	6.41534	1.07959e-05	0.000384383		RQCD1	0.567412	4.55002	0.000567551	0.0101884
GAREM	1.68173	3.84173	7.53352e-08	5.64593e-06		ACSL3	1.39767	6.08832	1.90051e-11	3.70323e-09
MAPRE2	1.19617	6.52457	2.07006e-07	1.36103e-05		WDFY1	0.827472	4.47454	3.48749e-05	0.00103533
ZNF532	0.487798	6.40403	0.00288353	0.0371428		DGKD	2.11141	7.49157	1.13958e-14	5.30993e-12
BCL2	-0.590001	5.82862	0.00273583	0.0356689		SRXN1	1.19159	4.43826	0.000148193	0.00344508
DSEL	1.4711	2.27227	3.69304e-06	0.000164225		PRNP	0.736319	5.80428	0.000113863	0.00276423
SOCS6	1.19054	5.67635	2.74232e-06	0.000126135		JAG1	0.825206	4.33939	0.0030062	0.0383084
ZNF516	0.596786	4.55176	0.00149537	0.0218336		THBD	3.29901	6.36199	1.73825e-08	1.53209e-06
MIDN	1.54114	7.04118	0.0011516	0.0175708		NANP	1.10095	1.92712	0.000502135	0.00926227
DOT1L	1.86402	5.14167	2.10242e-08	1.78823e-06		MAPRE1	0.607314	4.78435	0.00150318	0.021888
GADD45B	3.35994	4.64705	1.53028e-07	1.03798e-05		TP53INP2	0.940173	6.74265	1.36301e-05	0.000468482
DAPK3	0.931485	5.63233	2.29729e-07	1.49212e-05		RBM12	1.17061	4.88327	1.24452e-06	6.3512e-05
SEMA6B	1.38851	3.12293	2.26916e-06	0.00010666		PPP1R16B	0.897793	3.03153	0.00294986	0.0377702
COL5A3	1.08605	4.42666	0.000113834	0.00276423		TOP1	0.755156	4.06344	0.000242169	0.00521153
ICAM1	1.48165	3.71078	0.00209272	0.0289764		SRSF6	0.983342	5.72919	1.22371e-05	0.000428578
PDE4A	-0.871815	5.30361	3.6526e-06	0.000163104		PKIG	1.46126	5.37159	7.16086e-15	3.65443e-12
CNN1	3.58104	4.96194	4.41554e-17	3.15475e-14		SDC4	1.67677	6.2957	6.17628e-07	3.4296e-05
JUNB	2.48027	4.93542	7.65469e-06	0.000291328		PTPN1	1.34209	5.30452	5.74334e-06	0.000236736
TPM4	0.803519	5.0866	0.00221992	0.0303455		LOC102724428	4.13106	4.36856	2.78083e-12	6.93073e-10
ANO8	-0.586944	3.92243	0.00250117	0.0334227		ADAMTS1	1.92037	5.33137	2.73885e-06	0.000126135
SLC27A1	-0.907877	5.22757	5.8206e-06	0.000239001		BACH1	0.89717	5.0317	0.00023753	0.00514873
JUND	0.9842	6.62742	5.33433e-05	0.00147721		RCAN1	2.50823	6.37176	1.75897e-12	4.71271e-10
GATAD2A	1.09828	4.54382	2.89726e-07	1.75424e-05		RUNX1	3.67761	4.2479	1.02439e-14	4.99016e-12
PLEKHF1	-2.06642	5.23604	2.914e-10	4.3985e-08		DYRK1A	0.727538	6.62653	6.15491e-05	0.00165371
ZNF507	0.829888	4.6416	1.31187e-05	0.000454994		ETS2	1.13157	5.86338	7.66582e-06	0.000291328
NUDT19	-0.848664	4.96048	3.3558e-05	0.00100459		ZBTB21	1.4804	3.03754	0.000678571	0.0116729
UBA2	0.658213	6.3988	0.000316288	0.00649359		SIK1	4.22954	4.23273	1.41415e-11	2.97165e-09
WDR62	-0.866443	6.58562	0.00187125	0.0263525		ARVCF	0.691004	4.70803	0.000598543	0.0106143
ZNF146	0.660026	5.72967	6.3895e-05	0.00170764		KIAA1671	1.03446	6.19277	4.94588e-05	0.00138394
ZNF529	0.667498	3.24348	0.00368597	0.043843		PITPNB	0.754859	3.81418	0.000515774	0.00948121
PLEKHG2	1.15792	2.73665	0.000138224	0.00324146		ZNRF3	0.769969	2.56315	0.00231658	0.0313866
SERTAD1	1.5167	3.8675	0.00103131	0.0162299		EWSR1	0.422644	5.86824	0.00416585	0.048635
LIPE	2.23582	4.66603	0.00114584	0.0175428		PES1	0.554451	4.30203	0.00312706	0.0390592
PVR	2.17144	5.44025	1.25568e-09	1.43161e-07		HMOX1	1.47654	3.86606	4.21694e-05	0.00121814
BCL3	2.01982	3.23891	6.34567e-07	3.48751e-05		MYH9	2.06852	7.98646	9.97492e-10	1.22875e-07
RELB	0.84168	2.55869	0.000674919	0.0116288		MAFF	3.82085	4.31307	5.31382e-10	7.39588e-08
GRWD1	0.896526	4.5646	5.94117e-06	0.000242097		DDX17	0.632827	7.65297	0.00242545	0.0324919
DBP	-2.17581	4.24001	1.70758e-16	1.07648e-13		SUN2	0.599577	6.63165	0.000765182	0.0128938
KCNA7	-0.834291	6.24141	0.000122166	0.00291593		PDGFB	0.717903	4.30916	0.000400357	0.00784391
PRR12	-0.843578	4.48721	0.000334721	0.00678112		MGAT3	1.14137	1.8823	0.000825999	0.0137031
ZNF274	0.724569	3.99372	0.000124503	0.00295385		TYMP	0.982237	2.76033	0.00308845	0.0388333
PXDN	1.02888	4.08522	0.00348023	0.0421635		LMCD1	1.88628	9.51421	7.47022e-06	0.000288666
YWHAQ	0.961916	5.33639	2.51635e-05	0.000799523		LINC00312	1.37178	3.93005	4.39025e-05	0.00125519
KLF11	1.23788	4.37229	4.1694e-08	3.41095e-06		EAF1	0.659028	3.5091	0.00240628	0.0322755
KLHL29	1.64352	3.02259	1.90538e-07	1.26832e-05		COLQ	0.982943	4.17085	8.03625e-05	0.00206534
ITSN2	0.645106	4.12199	0.000566465	0.0101859		SLC4A7	0.827219	4.35734	0.00108366	0.0168313
EPT1	0.893265	3.69805	0.000439526	0.0083666		CSRNP1	2.50324	4.96877	3.23542e-07	1.91569e-05
WDR43	1.2627	4.91826	7.03684e-06	0.000279311		XIRP1	4.96246	12.3927	1.83065e-23	6.53971e-20
CRIM1	1.38519	6.97538	1.48329e-12	4.2792e-10		KLHL40	3.42232	10.445	3.58108e-12	8.52855e-10
STRN	0.76385	5.13883	0.00104705	0.0163814		HHATL	1.08445	8.34044	0.000788175	0.0131982
CYP1B1	2.26173	3.47858	2.60979e-07	1.61671e-05		GNL3	0.697737	5.35952	0.000629464	0.0109869
GALM	-0.665633	3.38961	0.00271876	0.0355329		ITIH4	0.971845	6.43151	3.37352e-05	0.00100708
SRSF7	0.943595	5.16709	1.37199e-06	6.93568e-05		MUSTN1	1.30934	4.90774	0.00170983	0.0243998
SOS1	-0.702295	5.32724	8.7305e-05	0.00220672		TKT	1.38366	3.47851	0.00247734	0.0331456
MAP4K3	0.648447	5.58654	4.67116e-05	0.00132087		PDE12	0.649742	3.68221	0.0032305	0.0399367
PPM1B	0.503552	7.08158	0.00178251	0.0253021		SLMAP	0.805411	7.49266	8.42452e-05	0.00214966
PREPL	0.741974	5.58726	6.68369e-05	0.001773		FLNB	1.10436	5.1336	2.78426e-05	0.000864897
LGALSL	-1.27778	5.9144	3.00847e-08	2.51888e-06		EOGT	0.705641	3.93344	0.000351858	0.00708808
PNO1	0.734779	3.55006	0.00363341	0.043459		ST3GAL6	1.12699	3.63994	0.00049363	0.00913684
AAK1	0.970074	4.00332	8.03221e-06	0.000302039		PHLDB2	1.35319	3.29011	0.000324431	0.00661012
MXD1	1.51215	3.68198	3.06812e-05	0.000934121		ZBTB20	1.11735	6.48608	7.43099e-05	0.00193296
PCYOX1	-0.841117	7.06467	5.93072e-06	0.000242097		GSK3B	0.846024	5.94659	7.36747e-06	0.000287117
FAM136A	-0.691851	3.73665	0.00114843	0.0175573		KPNA1	0.695888	7.38971	0.000413477	0.00801308
TET3	1.40459	2.61784	0.000435008	0.00832497		SEC61A1	1.03336	6.35786	1.7441e-08	1.53209e-06
LOC100996506	1.01841	1.67891	0.00307744	0.0388011		PAQR9	3.52822	3.92554	2.85703e-07	1.7397e-05
MAT2A	0.934517	6.79395	0.000317699	0.00651009		PLOD2	1.29819	2.2032	0.00146863	0.0215607
POLR1A	0.525798	4.36942	0.00411733	0.0482246		TM4SF1	0.723395	5.25817	0.00101668	0.0160705
RNF103	0.629311	5.10364	0.00100067	0.0158877		PFN2	0.786703	7.82053	0.000352624	0.00709019
EIF2AK3	2.08804	3.17819	2.46493e-11	4.55459e-09		LOC646903	1.47034	5.25923	2.4526e-07	1.5603e-05
STARD7	-0.604481	7.4705	0.000781392	0.0131051		TSC22D2	1.6345	4.91962	3.13823e-07	1.8789e-05
ARID5A	2.49569	5.9789	1.79666e-20	2.75069e-17		CCNL1	0.774585	4.45649	0.000838613	0.0138481
TMEM131	-0.55505	5.91641	0.00319496	0.039676		GOLIM4	0.733375	5.4191	0.000115034	0.00278289
RNF149	1.77221	3.71754	1.55348e-05	0.00052853		FNDC3B	1.46236	5.42813	8.40393e-07	4.52587e-05
IL1R1	3.35872	5.62647	1.9481e-12	4.97089e-10		NCEH1	1.49814	3.87835	7.46638e-08	5.63501e-06
FHL2	1.58875	6.18358	1.09164e-05	0.000387388		ATP11B	0.990601	4.71204	1.05996e-05	0.000378653
RGPD3	0.743555	3.04216	0.00370628	0.0440357		MCF2L2	1.88805	3.49133	2.62997e-09	2.79063e-07
LIMS1	1.59944	6.51418	3.68147e-08	3.03495e-06		TRA2B	0.668191	5.56927	0.000297216	0.0062091
RANBP2	0.81752	6.64488	8.6899e-05	0.00220165		ETV5	1.36063	2.79086	0.000919008	0.0148306
RGPD5	0.706926	4.13296	0.000533163	0.00970104		LPP	0.713844	5.62139	0.000183475	0.00410502
NPHP1	-0.815827	4.06893	0.00159842	0.0230866		TP63	1.36114	5.41905	2.04672e-08	1.75477e-06
LIMS3L	1.77452	3.80153	2.46048e-07	1.5603e-05		ATP13A3	1.56878	5.04537	2.01806e-07	1.33503e-05
BCL2L11	0.744712	4.17953	0.000928175	0.0149134		PAK2	0.565729	5.79751	0.00299665	0.0382322
STEAP3	-0.699945	5.16386	0.000211431	0.00464324		KIAA0226	1.35454	4.22178	1.01601e-07	7.21095e-06
NIFK	1.12558	3.38719	2.3842e-05	0.000776641		FYTTD1	0.655333	7.51216	0.00109463	0.0168793
UGGT1	0.673693	5.6475	9.51908e-05	0.00239474		LYAR	1.19788	3.458	0.00028989	0.00607975
RND3	1.4468	3.4237	0.000102795	0.00255603		WDR1	1.38785	7.30906	8.57781e-10	1.08151e-07
LOC101929336	2.04199	2.66954	6.88936e-08	5.2738e-06		PPARGC1A	2.47438	7.22214	1.89599e-10	2.94483e-08
FMNL2	1.3339	4.45191	7.90123e-07	4.29835e-05		DHX15	0.66851	5.25869	0.000910472	0.0147395
TANC1	0.988231	3.16235	1.37566e-05	0.00047102		RELL1	0.885964	3.3254	0.000216267	0.00473008
ITGB6	-0.708782	6.87142	0.00037975	0.0075269		UGDH	1.17855	2.39215	0.00125954	0.0189852
COBLL1	1.27687	3.04551	0.00116184	0.0176617		APBB2	1.28228	5.61196	5.26617e-06	0.000221324
XIRP2	1.68604	12.5978	6.23052e-07	3.44188e-05		KDR	1.07961	3.76175	0.000304163	0.00632954
CERS6	0.730256	3.20099	0.00420856	0.0490785		PPAT	1.10148	2.04106	0.0016085	0.0231437
BBS5	0.763687	3.17901	0.00231268	0.0313734		PAICS	0.715488	4.60855	0.00044263	0.00838779
FASTKD1	-0.641514	3.55152	0.00349907	0.0422769		ANKRD17	0.700352	5.70163	7.21025e-05	0.0018893
ZNF385B	1.89488	4.64808	8.99396e-13	2.75395e-10		ANXA3	0.612574	3.74286	0.00309464	0.0388352
ITGAV	1.24562	6.19702	0.000265101	0.00562751		BMP2K	1.20891	3.19533	0.000880734	0.0143885
TFPI	1.19757	4.26901	5.92038e-05	0.00160496		AGPAT9	1.50153	5.61787	6.56202e-10	8.90088e-08
OSGEPL1	-1.03537	2.8849	0.000150639	0.00349182		FAM13A	0.921189	4.01345	3.1272e-05	0.000949411
C2orf88	-0.717689	3.84881	0.00311166	0.038912		EIF4E	2.65612	5.36599	1.0366e-07	7.30873e-06
MSTN	-1.45983	3.08818	7.24217e-05	0.00189017		LOC285556	2.51908	9.17528	7.63754e-08	5.68413e-06
NAB1	0.983675	3.25029	0.000258962	0.00552849		NPNT	1.25796	2.91952	0.000390993	0.0077027
SLC39A10	1.08998	1.90521	0.000111741	0.00272786		SGMS2	2.85996	4.03748	3.99019e-10	5.70172e-08
STK17B	0.984374	2.05247	0.000416486	0.0080423		SYNPO2	1.02099	11.6371	1.20548e-05	0.00042358
COQ10B	1.11765	3.30781	4.39204e-05	0.00125519		CCRN4L	1.5457	3.39744	0.000153638	0.00353335
MARS2	1.02906	2.86021	0.000105766	0.00261778		NAA15	0.663317	5.41861	0.00122957	0.018612
SATB2	1.56441	2.50899	0.000625238	0.010931		ABCE1	1.0747	4.68743	2.33999e-05	0.000764564
C2orf69	0.756243	4.31269	0.000420109	0.00809667		SMAD1	1.24774	4.68921	2.55785e-07	1.60307e-05
BZW1	1.18557	5.24379	1.95743e-05	0.000649468		FBXW7	0.975914	5.64289	2.62549e-05	0.00082757
FZD7	-0.948219	5.13426	0.000266442	0.00564321		ANXA2P1	1.10809	2.29748	0.00262713	0.0346172
NOP58	1.028	4.51409	5.24455e-07	2.92739e-05		GUCY1B3	0.792582	2.49454	0.00184627	0.0260691
ZDBF2	-0.614478	4.05492	0.0037511	0.0444696		FNIP2	2.63874	6.16538	1.50801e-10	2.39425e-08
IKZF2	-0.933622	3.42419	6.15687e-05	0.00165371		SH3RF1	0.945607	3.91939	0.00371502	0.0440906
SMARCAL1	-0.761604	3.24505	0.000944715	0.0151338		ASB5	3.24762	10.468	5.94948e-22	1.27521e-18
IGFBP2	0.957805	2.9774	0.000401448	0.00785094		LOC391722	0.643322	3.92371	0.00423088	0.0492317
RQCD1	0.567412	4.55002	0.000567551	0.0101884		ANKRD37	1.40737	3.24955	7.21971e-06	0.000284462
ACSL3	1.39767	6.08832	1.90051e-11	3.70323e-09		MYO10	0.814403	3.99813	4.40427e-05	0.00125533
WDFY1	0.827472	4.47454	3.48749e-05	0.00103533		OSMR	1.54571	3.1204	1.31772e-05	0.000455549
DGKD	2.11141	7.49157	1.13958e-14	5.30993e-12		RICTOR	1.62338	5.91975	1.97851e-13	7.06789e-11
TCF15	-0.932184	2.15411	0.00203865	0.0283744		PTGER4	1.15542	3.15345	0.00100606	0.0159497
SRXN1	1.19159	4.43826	0.000148193	0.00344508		FST	1.2711	2.33187	0.00203605	0.0283744
PRNP	0.736319	5.80428	0.000113863	0.00276423		PPAP2A	1.10061	5.41759	1.58869e-11	3.21244e-09
JAG1	0.825206	4.33939	0.0030062	0.0383084		PLK2	2.19943	3.78208	8.90307e-08	6.40364e-06
CSRP2BP	-0.55544	4.52142	0.00347063	0.0421608		PDE4D	1.40068	7.40726	4.65226e-08	3.69321e-06
THBD	3.29901	6.36199	1.73825e-08	1.53209e-06		DIMT1	0.89052	3.43026	0.00160885	0.0231437
NANP	1.10095	1.92712	0.000502135	0.00926227		MAST4	3.48508	6.10338	9.88826e-17	6.62328e-14
MYLK2	-0.719964	9.3988	0.00306151	0.0387099		TNPO1	0.530256	6.14615	0.00310455	0.0389
MAPRE1	0.607314	4.78435	0.00150318	0.021888		CHD1	0.982907	4.25374	0.00215975	0.0296744
PXMP4	-0.67565	3.54338	0.000979195	0.0156161		ZNF608	1.2837	2.60229	7.74801e-06	0.000293411
TP53INP2	0.940173	6.74265	1.36301e-05	0.000468482		GRAMD3	1.59407	2.5918	8.775e-06	0.000325404
RBM12	1.17061	4.88327	1.24452e-06	6.3512e-05		37681	1.93633	3.41837	9.77693e-07	5.13624e-05
NDRG3	-1.18343	3.77664	8.8933e-09	8.36048e-07		FNIP1	0.661	5.29662	5.6567e-05	0.00155046
RBL1	-0.897658	4.04545	4.01336e-05	0.00116561		SLC22A5	0.871706	3.63278	0.00321715	0.0399053
PPP1R16B	0.897793	3.03153	0.00294986	0.0377702		AFF4	0.651327	6.09583	0.00126176	0.018992
TOP1	0.755156	4.06344	0.000242169	0.00521153		PPP2CA	1.0856	6.73462	3.59102e-08	2.98333e-06
SRSF6	0.983342	5.72919	1.22371e-05	0.000428578		SEC24A	0.728042	3.74168	0.000729668	0.0124719
PKIG	1.46126	5.37159	7.16086e-15	3.65443e-12		PITX1	2.16024	3.2564	0.000136729	0.00322049
SDC4	1.67677	6.2957	6.17628e-07	3.4296e-05		EGR1	3.37062	5.08728	3.76992e-07	2.20777e-05
ZMYND8	-0.877922	3.56954	0.000491669	0.00911876		HBEGF	2.72182	6.46305	2.20037e-09	2.40626e-07
CEBPB	-1.44973	7.08121	3.25055e-09	3.355e-07		DIAPH1	2.04983	7.26571	7.9221e-18	6.53086e-15
PTPN1	1.34209	5.30452	5.74334e-06	0.000236736		SPRY4	1.04973	3.21806	0.000397071	0.00779379
RBM38	-0.63876	7.91058	0.00198106	0.027753		CSNK1A1	0.838126	6.5381	0.00205544	0.028497
LOC102724428	4.13106	4.36856	2.78083e-12	6.93073e-10		PPARGC1B	1.08838	3.67011	0.000162065	0.00369543
ADAMTS1	1.92037	5.33137	2.73885e-06	0.000126135		SLC36A1	1.60834	3.13112	2.24886e-07	1.46958e-05
BACH1	0.89717	5.0317	0.00023753	0.00514873		CPEB4	1.88093	7.46537	5.03044e-07	2.83743e-05
RCAN1	2.50823	6.37176	1.75897e-12	4.71271e-10		NOP16	0.895813	4.10155	0.000455821	0.00857023
RUNX1	3.67761	4.2479	1.02439e-14	4.99016e-12		HNRNPAB	0.719324	5.40262	0.000179129	0.00402458
DYRK1A	0.727538	6.62653	6.15491e-05	0.00165371		HNRNPH1	0.553885	6.34815	0.00260001	0.0343316
ETS2	1.13157	5.86338	7.66582e-06	0.000291328		PXDC1	0.96166	3.37036	0.00382274	0.0452688
ZBTB21	1.4804	3.03754	0.000678571	0.0116729		BMP6	1.03815	2.37011	3.7252e-05	0.00109378
SIK1	4.22954	4.23273	1.41415e-11	2.97165e-09		PAK1IP1	0.688616	3.25164	0.00422673	0.0492317
ARVCF	0.691004	4.70803	0.000598543	0.0106143		E2F3	0.814322	3.20514	0.00047458	0.00886075
ZNF74	-0.9982	2.7454	1.14986e-05	0.000405365		SOX4	1.33636	3.00602	6.1073e-06	0.000246989
KIAA1671	1.03446	6.19277	4.94588e-05	0.00138394		FAM65B	0.789586	5.0627	0.000372121	0.00742647
PITPNB	0.754859	3.81418	0.000515774	0.00948121		TRIM38	1.92245	3.80915	1.02675e-09	1.25042e-07
ZNRF3	0.769969	2.56315	0.00231658	0.0313866		PPP1R18	1.26802	3.40555	3.263e-05	0.000981674
EWSR1	0.422644	5.86824	0.00416585	0.048635		IER3	1.57962	2.99137	0.000312547	0.00646633
PES1	0.554451	4.30203	0.00312706	0.0390592		HSPA1L	1.3067	3.6214	0.00322697	0.0399367
HMOX1	1.47654	3.86606	4.21694e-05	0.00121814		HSPA1A	2.55572	9.08863	1.41012e-07	9.74981e-06
MYH9	2.06852	7.98646	9.97492e-10	1.22875e-07		HSPA1B	2.55948	8.94311	1.63544e-07	1.10233e-05
MAFF	3.82085	4.31307	5.31382e-10	7.39588e-08		CDKN1A	3.37294	6.25172	2.3322e-14	9.61316e-12
DDX17	0.632827	7.65297	0.00242545	0.0324919		PIM1	1.36312	4.01183	0.00103723	0.0162843
SUN2	0.599577	6.63165	0.000765182	0.0128938		BYSL	0.742435	3.53078	0.00272468	0.0355669
PDGFB	0.717903	4.30916	0.000400357	0.00784391		POLR1C	1.07889	2.40906	0.00015157	0.00350082
MGAT3	1.14137	1.8823	0.000825999	0.0137031		VEGFA	0.785764	6.75849	0.000164057	0.00372499
TEF	-1.88703	6.13777	3.952e-17	3.02526e-14		TMEM63B	0.573837	5.12607	0.00226461	0.0308776
TOB2	-0.994689	6.58852	0.000680131	0.011681		ELOVL5	1.34387	3.64759	0.00275363	0.0358158
TYMP	0.982237	2.76033	0.00308845	0.0388333		SLC17A5	0.970114	2.8013	0.00129802	0.0193476
LMCD1	1.88628	9.51421	7.47022e-06	0.000288666		FILIP1	0.776245	6.52539	0.0035502	0.042702
LINC00312	1.37178	3.93005	4.39025e-05	0.00125519		AKIRIN2	0.882387	5.76809	0.000349298	0.00704977
IQSEC1	-0.581779	6.29216	0.00063829	0.0111102		LOC101929004	0.975042	3.48898	4.73428e-05	0.00133519
EAF1	0.659028	3.5091	0.00240628	0.0322755		UBE2J1	0.667033	4.3177	0.000529374	0.00964846
COLQ	0.982943	4.17085	8.03625e-05	0.00206534		BACH2	1.12398	3.54591	7.64477e-06	0.000291328
PLCL2	-1.00421	5.6974	7.83788e-08	5.79301e-06		AMD1	1.29244	5.36038	7.33393e-06	0.000286853
NR1D2	-1.49953	6.63151	4.59538e-14	1.69823e-11		VGLL2	2.43474	8.18706	2.99423e-21	5.34819e-18
SLC4A7	0.827219	4.35734	0.00108366	0.0168313		GJA1	1.67685	3.80936	2.95014e-07	1.77622e-05
ACVR2B	-0.780076	3.82249	0.000877922	0.0143644		TRMT11	0.821915	2.51292	0.00290012	0.0373116
CSRNP1	2.50324	4.96877	3.23542e-07	1.91569e-05		RSPO3	0.91684	5.73647	0.000762519	0.0128903
XIRP1	4.96246	12.3927	1.83065e-23	6.53971e-20		RNF146	0.687411	6.19869	0.000436112	0.00833122
KLHL40	3.42232	10.445	3.58108e-12	8.52855e-10		SGK1	2.07561	6.04008	3.20441e-06	0.000145516
HHATL	1.08445	8.34044	0.000788175	0.0131982		IFNGR1	0.683522	5.07952	0.00127655	0.0191054
POMGNT2	-0.579836	4.18356	0.00264474	0.0347775		TNFAIP3	0.951181	3.29466	0.00065983	0.0114239
PFKFB4	-0.956425	2.41987	0.000167079	0.0037776		CITED2	1.61976	6.28861	1.63057e-12	4.48072e-10
SLC38A3	-1.82363	4.74751	8.67423e-11	1.45253e-08		SYNJ2	1.82229	3.85999	1.88649e-08	1.63045e-06
DUSP7	-0.867823	4.55694	0.000102758	0.00255603		DYNLT1	0.983878	4.33017	5.39312e-06	0.000225774
GNL3	0.697737	5.35952	0.000629464	0.0109869		QKI	0.600003	8.75108	0.000619461	0.0108832
ITIH4	0.971845	6.43151	3.37352e-05	0.00100708		MAFK	1.17188	5.59255	1.16536e-10	1.8923e-08
MUSTN1	1.30934	4.90774	0.00170983	0.0243998		HDAC9	1.31402	5.6474	1.2137e-06	6.22358e-05
TKT	1.38366	3.47851	0.00247734	0.0331456		TWISTNB	0.67138	3.80104	0.00226822	0.0308875
ASB14	-0.814939	5.24146	0.000890328	0.014501		DFNA5	1.37692	2.4533	3.1982e-05	0.000968225
PDE12	0.649742	3.68221	0.0032305	0.0399367		CREB5	1.92444	4.10284	4.64284e-10	6.54701e-08
SLMAP	0.805411	7.49266	8.42452e-05	0.00214966		WIPF3	1.62453	5.81024	8.78959e-10	1.09533e-07
FLNB	1.10436	5.1336	2.78426e-05	0.000864897		STK17A	1.48095	3.62709	5.11245e-07	2.86859e-05
EOGT	0.705641	3.93344	0.000351858	0.00708808		URGCP	0.476512	5.17599	0.00292607	0.0375553
PDZRN3	-0.999834	6.26145	0.000237811	0.00514873		UPP1	0.82481	2.11527	0.00130675	0.0194507
ST3GAL6	1.12699	3.63994	0.00049363	0.00913684		AUTS2	2.31506	5.50381	5.06802e-19	4.93763e-16
PHLDB2	1.35319	3.29011	0.000324431	0.00661012		TBL2	0.779265	3.01223	0.00233948	0.0316169
ZBTB20	1.11735	6.48608	7.43099e-05	0.00193296		ELN	1.5669	3.90342	2.10937e-05	0.000695572
POPDC2	-0.760113	5.17417	0.000913975	0.0147739		HSPB1	1.34699	10.1587	8.3617e-06	0.000312238
GSK3B	0.846024	5.94659	7.36747e-06	0.000287117		ABCB4	0.942594	3.58703	4.28874e-05	0.00123555
KPNA1	0.695888	7.38971	0.000413477	0.00801308		PDK4	2.60514	10.6215	2.33003e-09	2.52232e-07
OSBPL11	-0.548627	6.04257	0.00218759	0.0299801		LMTK2	0.974281	5.63777	6.10223e-05	0.0016473
KLF15	-1.63505	5.80254	3.80078e-15	2.14384e-12		SRPK2	1.79036	4.88751	2.81889e-06	0.000128553
SEC61A1	1.03336	6.35786	1.7441e-08	1.53209e-06		PNPLA8	1.36072	5.71231	1.28661e-06	6.53488e-05
KY	-1.65727	4.64443	0.000238893	0.00516172		IFRD1	3.00567	7.11939	3.97185e-12	9.25355e-10
EPHB1	-1.56748	2.68822	6.64431e-10	8.90088e-08		TMEM168	0.765701	3.52948	0.00132335	0.0196431
PAQR9	3.52822	3.92554	2.85703e-07	1.7397e-05		CPED1	0.992173	5.76926	1.30042e-07	9.10892e-06
PLOD2	1.29819	2.2032	0.00146863	0.0215607		FLNC	2.1364	12.9984	1.6294e-11	3.23375e-09
TM4SF1	0.723395	5.25817	0.00101668	0.0160705		ZYX	0.607548	5.75339	0.000382602	0.00755128
RNF13	-0.605441	4.82699	0.000762567	0.0128903		RHEB	0.79568	4.96271	7.26355e-06	0.000285141
PFN2	0.786703	7.82053	0.000352624	0.00709019		PRKAG2	2.40758	4.24935	6.38075e-10	8.76698e-08
LOC646903	1.47034	5.25923	2.4526e-07	1.5603e-05		ACTR3B	0.714306	2.80384	0.000806764	0.0134884
TSC22D2	1.6345	4.91962	3.13823e-07	1.8789e-05		RPL23AP53	0.863889	2.26535	0.00151447	0.0219927
CCNL1	0.774585	4.45649	0.000838613	0.0138481		ANGPT2	1.08479	1.95742	0.00343477	0.0419731
GOLIM4	0.733375	5.4191	0.000115034	0.00278289		SGK223	1.05194	3.97146	2.39169e-07	1.53484e-05
SKIL	-0.69442	4.57835	0.00256472	0.0339754		DLC1	0.877823	4.30698	0.00143439	0.0211159
FNDC3B	1.46236	5.42813	8.40393e-07	4.52587e-05		VPS37A	0.713847	5.1511	0.000144009	0.0033624
NCEH1	1.49814	3.87835	7.46638e-08	5.63501e-06		TNFRSF10B	1.13585	3.30936	6.63383e-06	0.000265279
ATP11B	0.990601	4.71204	1.05996e-05	0.000378653		LOXL2	1.39145	2.3892	1.19659e-06	6.16529e-05
MCF2L2	1.88805	3.49133	2.62997e-09	2.79063e-07		NKX3-1	0.958274	2.65463	0.000559817	0.0101173
MAP6D1	-0.756137	4.45476	0.000894308	0.0145437		RBPMS	1.21408	3.196	0.00212278	0.029279
TRA2B	0.668191	5.56927	0.000297216	0.0062091		PPP2CB	0.823795	6.03564	0.000519093	0.00952589
ETV5	1.36063	2.79086	0.000919008	0.0148306		FGFR1	0.995135	5.61602	0.000150855	0.00349182
LPP	0.713844	5.62139	0.000183475	0.00410502		HOOK3	0.524903	5.48091	0.00334215	0.0410035
TP63	1.36114	5.41905	2.04672e-08	1.75477e-06		FAM110B	0.950442	4.33858	4.43815e-05	0.00126163
ATP13A3	1.56878	5.04537	2.01806e-07	1.33503e-05		SDCBP	1.13574	5.6968	1.44725e-08	1.29252e-06
PAK2	0.565729	5.79751	0.00299665	0.0382322		TRIM55	1.45659	5.6405	7.98481e-05	0.00205705
KIAA0226	1.35454	4.22178	1.01601e-07	7.21095e-06		RRS1	0.668503	3.93144	0.00368186	0.0438428
FYTTD1	0.655333	7.51216	0.00109463	0.0168793		SLCO5A1	1.1306	4.85463	5.06416e-08	3.9615e-06
LYAR	1.19788	3.458	0.00028989	0.00607975		HEY1	0.899906	3.08265	0.00240539	0.0322755
WDR1	1.38785	7.30906	8.57781e-10	1.08151e-07		FABP4	1.96146	5.87335	0.000467178	0.00876839
PPARGC1A	2.47438	7.22214	1.89599e-10	2.94483e-08		UBR5	0.642603	6.23722	0.00057441	0.0102834
DHX15	0.66851	5.25869	0.000910472	0.0147395		AZIN1	0.79872	6.1693	0.000106832	0.00263806
RELL1	0.885964	3.3254	0.000216267	0.00473008		ABRA	2.44617	9.26467	4.6317e-09	4.5961e-07
UGDH	1.17855	2.39215	0.00125954	0.0189852		FAM84B	0.821682	2.52054	0.00185973	0.0262247
APBB2	1.28228	5.61196	5.26617e-06	0.000221324		MYC	3.84776	5.09759	6.15397e-12	1.34596e-09
USP46	-0.578208	4.72897	0.00301943	0.0383858		ASAP1	1.00732	3.52431	2.70286e-05	0.000844505
KDR	1.07961	3.76175	0.000304163	0.00632954		KIAA0020	1.00287	2.30855	0.000561747	0.0101351
PPAT	1.10148	2.04106	0.0016085	0.0231437		CDC37L1	1.67903	6.22215	1.08144e-09	1.28775e-07
PAICS	0.715488	4.60855	0.00044263	0.00838779		RCL1	0.802888	3.85895	0.000524482	0.00959956
ANKRD17	0.700352	5.70163	7.21025e-05	0.0018893		JAK2	1.6171	6.13664	5.62775e-13	1.88477e-10
ANXA3	0.612574	3.74286	0.00309464	0.0388352		TEK	0.699227	3.94999	0.00315254	0.0392091
BMP2K	1.20891	3.19533	0.000880734	0.0143885		DNAJA1	1.01798	4.96283	0.000111483	0.00272777
AGPAT9	1.50153	5.61787	6.56202e-10	8.90088e-08		ANXA2P2	1.15904	5.60987	3.8913e-05	0.00113632
FAM13A	0.921189	4.01345	3.1272e-05	0.000949411		DNAJB5	1.01671	7.78258	0.00267582	0.0350736
EIF4E	2.65612	5.36599	1.0366e-07	7.30873e-06		RUSC2	0.854046	6.38014	6.62385e-05	0.00176148
LOC285556	2.51908	9.17528	7.63754e-08	5.68413e-06		RNF38	0.610722	4.77255	0.00295874	0.0378386
NPNT	1.25796	2.91952	0.000390993	0.0077027		FBXO10	0.692361	4.73023	0.00148565	0.0217213
SGMS2	2.85996	4.03748	3.99019e-10	5.70172e-08		SHB	1.14172	2.88515	0.000623476	0.010918
PITX2	-0.783895	5.4193	0.000273026	0.00577125		SMC5	1.177	5.32301	6.00735e-08	4.66527e-06
SYNPO2	1.02099	11.6371	1.20548e-05	0.00042358		TMEM2	1.18103	4.08608	0.00015503	0.00355771
CCRN4L	1.5457	3.39744	0.000153638	0.00353335		ZFAND5	0.554445	8.20336	0.00367651	0.0438277
NAA15	0.663317	5.41861	0.00122957	0.018612		TLE4	0.664958	5.33771	0.00161686	0.0232277
RNF150	-0.756743	4.38038	0.0028318	0.0366277		FRMD3	1.88601	6.20052	1.01948e-06	5.30377e-05
GAB1	-1.39864	5.05218	7.39633e-08	5.62174e-06		S1PR3	1.31881	2.15365	0.00018456	0.00412069
ABCE1	1.0747	4.68743	2.33999e-05	0.000764564		NFIL3	2.73003	5.01717	4.92426e-15	2.63867e-12
SMAD1	1.24774	4.68921	2.55785e-07	1.60307e-05		NR4A3	4.20172	6.70744	1.21659e-09	1.40196e-07
NR3C2	-0.777901	4.70212	2.9221e-05	0.000899891		RALGAPA1P	0.714272	4.23422	0.000302516	0.00630751
FBXW7	0.975914	5.64289	2.62549e-05	0.00082757		TMEM38B	0.769368	6.87613	6.75384e-05	0.00178278
ANXA2P1	1.10809	2.29748	0.00262713	0.0346172		ZNF462	1.09946	4.67078	6.68785e-06	0.000266445
GUCY1B3	0.792582	2.49454	0.00184627	0.0260691		CTNNAL1	1.13189	4.93947	1.59727e-05	0.00054
FNIP2	2.63874	6.16538	1.50801e-10	2.39425e-08		PTPN3	0.660595	7.06549	0.000103757	0.00257398
SH3RF1	0.945607	3.91939	0.00371502	0.0440906		UGCG	1.83324	3.46217	2.46857e-05	0.000791806
ASB5	3.24762	10.468	5.94948e-22	1.27521e-18		PTBP3	0.758422	3.24815	0.00345878	0.0421608
ING2	-1.08708	2.73203	6.55674e-05	0.00174797		TNC	2.66979	4.18119	1.2707e-05	0.000443585
LOC391722	0.643322	3.92371	0.00423088	0.0492317		TRAF1	0.884372	1.85358	0.00314462	0.039187
ANKRD37	1.40737	3.24955	7.21971e-06	0.000284462		STOM	1.16474	6.47365	1.36388e-05	0.000468482
LRRC14B	-1.03593	5.92108	2.1329e-05	0.000701175		HSPA5	0.860821	6.81873	0.00413906	0.0484261
MYO10	0.814403	3.99813	4.40427e-05	0.00125533		ZBTB43	1.35748	5.92895	4.16166e-06	0.000181303
OSMR	1.54571	3.1204	1.31772e-05	0.000455549		ANGPTL2	0.803403	6.3592	0.000346651	0.00700954
RICTOR	1.62338	5.91975	1.97851e-13	7.06789e-11		FAM102A	2.66499	3.77976	4.17508e-09	4.22116e-07
PTGER4	1.15542	3.15345	0.00100606	0.0159497		NUP188	0.586569	4.46416	0.00159575	0.0230792
NNT-AS1	-0.744686	4.75645	0.000242171	0.00521153		PLCXD1	1.49281	2.49018	0.000121135	0.00289778
FST	1.2711	2.33187	0.00203605	0.0283744		TXLNG	0.806572	2.9312	0.00211518	0.0292118
PPAP2A	1.10061	5.41759	1.58869e-11	3.21244e-09		SCML1	0.535417	4.24253	0.0033146	0.0407877
PLK2	2.19943	3.78208	8.90307e-08	6.40364e-06		CNKSR2	0.614077	3.1206	0.00404704	0.047505
PDE4D	1.40068	7.40726	4.65226e-08	3.69321e-06		KLHL34	0.973509	5.46603	3.95106e-06	0.000174253
DIMT1	0.89052	3.43026	0.00160885	0.0231437		ACOT9	0.787771	4.19982	8.1664e-06	0.000306011
MAST4	3.48508	6.10338	9.88826e-17	6.62328e-14		SAT1	1.50133	3.93365	9.59301e-06	0.000347325
TNPO1	0.530256	6.14615	0.00310455	0.0389		DYNLT3	0.859931	3.23092	0.0010971	0.0168931
CHD1	0.982907	4.25374	0.00215975	0.0296744		DDX3X	0.802795	7.3393	7.8426e-05	0.00202528
NREP	-0.545014	6.04321	0.00365607	0.0436326		TIMP1	1.22405	4.04869	0.000750886	0.0127734
AC010226.4	-0.842872	1.94132	0.00174232	0.0248303		CLCN5	1.97487	3.46686	7.10833e-16	4.23222e-13
ZNF608	1.2837	2.60229	7.74801e-06	0.000293411		MSN	1.00474	6.18769	3.27011e-05	0.000981674
GRAMD3	1.59407	2.5918	8.775e-06	0.000325404		STARD8	1.32363	4.09342	0.000108987	0.00267281
37681	1.93633	3.41837	9.77693e-07	5.13624e-05		OGT	0.696897	6.90898	0.000415628	0.00804022
CTXN3	-1.22606	2.91671	0.00307318	0.038793		ARMCX4	1.23155	3.03432	2.49459e-05	0.00079567
SLC12A2	-1.20891	5.05883	4.22094e-12	9.62465e-10		ARMCX1	0.795505	4.85307	5.82401e-05	0.00159224
FNIP1	0.661	5.29662	5.6567e-05	0.00155046		LONRF3	2.34054	3.51082	2.54133e-11	4.61617e-09
SLC22A5	0.871706	3.63278	0.00321715	0.0399053		SLC25A5	0.726428	3.93195	0.00105827	0.0165087
AFF4	0.651327	6.09583	0.00126176	0.018992		NKRF	0.757221	2.54785	0.00140921	0.0208024
PPP2CA	1.0856	6.73462	3.59102e-08	2.98333e-06		DDX3Y	0.758671	5.30106	9.02896e-06	0.000332107
SEC24A	0.728042	3.74168	0.000729668	0.0124719
PITX1	2.16024	3.2564	0.000136729	0.00322049
EGR1	3.37062	5.08728	3.76992e-07	2.20777e-05
HBEGF	2.72182	6.46305	2.20037e-09	2.40626e-07
DIAPH1	2.04983	7.26571	7.9221e-18	6.53086e-15
SPRY4	1.04973	3.21806	0.000397071	0.00779379
AFAP1L1	-0.651583	5.41964	0.00306013	0.0387099
CSNK1A1	0.838126	6.5381	0.00205544	0.028497
ARHGEF37	-1.03979	5.21341	4.59347e-05	0.00130234
PPARGC1B	1.08838	3.67011	0.000162065	0.00369543
SLC36A1	1.60834	3.13112	2.24886e-07	1.46958e-05
CPEB4	1.88093	7.46537	5.03044e-07	2.83743e-05
NOP16	0.895813	4.10155	0.000455821	0.00857023
HNRNPAB	0.719324	5.40262	0.000179129	0.00402458
HNRNPH1	0.553885	6.34815	0.00260001	0.0343316
TRIM7	-0.70904	7.20692	0.000140526	0.00328824
PXDC1	0.96166	3.37036	0.00382274	0.0452688
BMP6	1.03815	2.37011	3.7252e-05	0.00109378
PAK1IP1	0.688616	3.25164	0.00422673	0.0492317
DTNBP1	-0.61945	3.2245	0.00407057	0.047729
E2F3	0.814322	3.20514	0.00047458	0.00886075
SOX4	1.33636	3.00602	6.1073e-06	0.000246989
FAM65B	0.789586	5.0627	0.000372121	0.00742647
TRIM38	1.92245	3.80915	1.02675e-09	1.25042e-07
PPP1R18	1.26802	3.40555	3.263e-05	0.000981674
IER3	1.57962	2.99137	0.000312547	0.00646633
HSPA1L	1.3067	3.6214	0.00322697	0.0399367
HSPA1A	2.55572	9.08863	1.41012e-07	9.74981e-06
HSPA1B	2.55948	8.94311	1.63544e-07	1.10233e-05
FANCE	-0.75326	3.48449	0.00104439	0.0163636
FKBP5	-0.87563	7.63904	0.0031537	0.0392091
CDKN1A	3.37294	6.25172	2.3322e-14	9.61316e-12
PIM1	1.36312	4.01183	0.00103723	0.0162843
TFEB	-0.67656	5.82197	0.000286386	0.00601804
BYSL	0.742435	3.53078	0.00272468	0.0355669
PRPH2	-1.12158	4.11873	0.00044111	0.00838187
POLR1C	1.07889	2.40906	0.00015157	0.00350082
VEGFA	0.785764	6.75849	0.000164057	0.00372499
TMEM63B	0.573837	5.12607	0.00226461	0.0308776
ENPP5	-1.1938	3.44887	0.00015316	0.00352993
ELOVL5	1.34387	3.64759	0.00275363	0.0358158
SLC17A5	0.970114	2.8013	0.00129802	0.0193476
FILIP1	0.776245	6.52539	0.0035502	0.042702
AKIRIN2	0.882387	5.76809	0.000349298	0.00704977
LOC101929004	0.975042	3.48898	4.73428e-05	0.00133519
UBE2J1	0.667033	4.3177	0.000529374	0.00964846
BACH2	1.12398	3.54591	7.64477e-06	0.000291328
C6orf203	-0.688749	3.74116	0.000871742	0.0143289
FOXO3	-1.55016	6.3601	1.93818e-12	4.97089e-10
SESN1	-1.07836	7.6899	8.93041e-06	0.000330025
AMD1	1.29244	5.36038	7.33393e-06	0.000286853
VGLL2	2.43474	8.18706	2.99423e-21	5.34819e-18
CEP85L	-0.592965	4.17916	0.00344273	0.0420225
GJA1	1.67685	3.80936	2.95014e-07	1.77622e-05
TRMT11	0.821915	2.51292	0.00290012	0.0373116
RSPO3	0.91684	5.73647	0.000762519	0.0128903
RNF146	0.687411	6.19869	0.000436112	0.00833122
ARHGAP18	-0.774266	3.9029	0.000369388	0.0073857
SGK1	2.07561	6.04008	3.20441e-06	0.000145516
IFNGR1	0.683522	5.07952	0.00127655	0.0191054
TNFAIP3	0.951181	3.29466	0.00065983	0.0114239
CITED2	1.61976	6.28861	1.63057e-12	4.48072e-10
SYNJ2	1.82229	3.85999	1.88649e-08	1.63045e-06
DYNLT1	0.983878	4.33017	5.39312e-06	0.000225774
QKI	0.600003	8.75108	0.000619461	0.0108832
MAFK	1.17188	5.59255	1.16536e-10	1.8923e-08
FAM220A	-0.784937	6.24972	7.19361e-06	0.000284462
HDAC9	1.31402	5.6474	1.2137e-06	6.22358e-05
TWISTNB	0.67138	3.80104	0.00226822	0.0308875
DFNA5	1.37692	2.4533	3.1982e-05	0.000968225
HOXA11	-0.964032	2.51799	0.00335271	0.041064
CREB5	1.92444	4.10284	4.64284e-10	6.54701e-08
WIPF3	1.62453	5.81024	8.78959e-10	1.09533e-07
STK17A	1.48095	3.62709	5.11245e-07	2.86859e-05
URGCP	0.476512	5.17599	0.00292607	0.0375553
UPP1	0.82481	2.11527	0.00130675	0.0194507
AUTS2	2.31506	5.50381	5.06802e-19	4.93763e-16
TBL2	0.779265	3.01223	0.00233948	0.0316169
ELN	1.5669	3.90342	2.10937e-05	0.000695572
HSPB1	1.34699	10.1587	8.3617e-06	0.000312238
ABCB4	0.942594	3.58703	4.28874e-05	0.00123555
ASB4	-0.670295	5.42332	0.00240221	0.0322755
PDK4	2.60514	10.6215	2.33003e-09	2.52232e-07
LMTK2	0.974281	5.63777	6.10223e-05	0.0016473
ACHE	-0.791396	7.15152	0.000422637	0.00811721
SRPK2	1.79036	4.88751	2.81889e-06	0.000128553
PNPLA8	1.36072	5.71231	1.28661e-06	6.53488e-05
IFRD1	3.00567	7.11939	3.97185e-12	9.25355e-10
TMEM168	0.765701	3.52948	0.00132335	0.0196431
CPED1	0.992173	5.76926	1.30042e-07	9.10892e-06
FLNC	2.1364	12.9984	1.6294e-11	3.23375e-09
ZYX	0.607548	5.75339	0.000382602	0.00755128
ASB10	-0.590091	6.01475	0.00347291	0.0421608
RHEB	0.79568	4.96271	7.26355e-06	0.000285141
PRKAG2	2.40758	4.24935	6.38075e-10	8.76698e-08
ACTR3B	0.714306	2.80384	0.000806764	0.0134884
RPL23AP53	0.863889	2.26535	0.00151447	0.0219927
ANGPT2	1.08479	1.95742	0.00343477	0.0419731
SGK223	1.05194	3.97146	2.39169e-07	1.53484e-05
DLC1	0.877823	4.30698	0.00143439	0.0211159
VPS37A	0.713847	5.1511	0.000144009	0.0033624
TNFRSF10B	1.13585	3.30936	6.63383e-06	0.000265279
LOXL2	1.39145	2.3892	1.19659e-06	6.16529e-05
NKX3-1	0.958274	2.65463	0.000559817	0.0101173
RBPMS	1.21408	3.196	0.00212278	0.029279
PPP2CB	0.823795	6.03564	0.000519093	0.00952589
FGFR1	0.995135	5.61602	0.000150855	0.00349182
ANK1	-0.627925	8.81374	0.00230839	0.0313734
HOOK3	0.524903	5.48091	0.00334215	0.0410035
FAM110B	0.950442	4.33858	4.43815e-05	0.00126163
SDCBP	1.13574	5.6968	1.44725e-08	1.29252e-06
TRIM55	1.45659	5.6405	7.98481e-05	0.00205705
RRS1	0.668503	3.93144	0.00368186	0.0438428
SLCO5A1	1.1306	4.85463	5.06416e-08	3.9615e-06
HEY1	0.899906	3.08265	0.00240539	0.0322755
FABP4	1.96146	5.87335	0.000467178	0.00876839
PDP1	-1.15268	5.52901	1.00298e-05	0.000359496
UBR5	0.642603	6.23722	0.00057441	0.0102834
AZIN1	0.79872	6.1693	0.000106832	0.00263806
ABRA	2.44617	9.26467	4.6317e-09	4.5961e-07
ANGPT1	-1.50155	4.95903	7.43615e-10	9.83867e-08
KLHL38	-0.926232	7.31212	0.000778594	0.0130787
FAM84B	0.821682	2.52054	0.00185973	0.0262247
MYC	3.84776	5.09759	6.15397e-12	1.34596e-09
ASAP1	1.00732	3.52431	2.70286e-05	0.000844505
THEM6	-0.640298	3.80498	0.00342069	0.0418487
ZNF252P	-0.793176	4.79798	4.28415e-06	0.000185437
KIAA0020	1.00287	2.30855	0.000561747	0.0101351
CDC37L1	1.67903	6.22215	1.08144e-09	1.28775e-07
RCL1	0.802888	3.85895	0.000524482	0.00959956
JAK2	1.6171	6.13664	5.62775e-13	1.88477e-10
ERMP1	-0.622033	4.10002	0.00104878	0.0163846
TEK	0.699227	3.94999	0.00315254	0.0392091
MOB3B	-1.02912	2.97482	0.000499195	0.00922393
DNAJA1	1.01798	4.96283	0.000111483	0.00272777
ANXA2P2	1.15904	5.60987	3.8913e-05	0.00113632
DNAJB5	1.01671	7.78258	0.00267582	0.0350736
RUSC2	0.854046	6.38014	6.62385e-05	0.00176148
RNF38	0.610722	4.77255	0.00295874	0.0378386
FBXO10	0.692361	4.73023	0.00148565	0.0217213
SHB	1.14172	2.88515	0.000623476	0.010918
APBA1	-1.17616	2.54064	1.80215e-05	0.000603551
SMC5	1.177	5.32301	6.00735e-08	4.66527e-06
KLF9	-0.865026	7.30396	2.53541e-06	0.000118139
TMEM2	1.18103	4.08608	0.00015503	0.00355771
ZFAND5	0.554445	8.20336	0.00367651	0.0438277
TLE4	0.664958	5.33771	0.00161686	0.0232277
TLE1	-0.77058	6.08382	0.00198401	0.0277579
FRMD3	1.88601	6.20052	1.01948e-06	5.30377e-05
RMI1	-0.753016	2.11231	0.00283329	0.0366277
S1PR3	1.31881	2.15365	0.00018456	0.00412069
NFIL3	2.73003	5.01717	4.92426e-15	2.63867e-12
NR4A3	4.20172	6.70744	1.21659e-09	1.40196e-07
RALGAPA1P	0.714272	4.23422	0.000302516	0.00630751
TMEM38B	0.769368	6.87613	6.75384e-05	0.00178278
ZNF462	1.09946	4.67078	6.68785e-06	0.000266445
CTNNAL1	1.13189	4.93947	1.59727e-05	0.00054
PTPN3	0.660595	7.06549	0.000103757	0.00257398
UGCG	1.83324	3.46217	2.46857e-05	0.000791806
PTBP3	0.758422	3.24815	0.00345878	0.0421608
TNC	2.66979	4.18119	1.2707e-05	0.000443585
TRAF1	0.884372	1.85358	0.00314462	0.039187
STOM	1.16474	6.47365	1.36388e-05	0.000468482
HSPA5	0.860821	6.81873	0.00413906	0.0484261
MVB12B	-0.728602	5.51053	6.97955e-05	0.00183783
ZBTB43	1.35748	5.92895	4.16166e-06	0.000181303
ANGPTL2	0.803403	6.3592	0.000346651	0.00700954
FAM102A	2.66499	3.77976	4.17508e-09	4.22116e-07
SLC25A25	-1.19867	5.27031	0.000234653	0.00511134
NUP188	0.586569	4.46416	0.00159575	0.0230792
FAM78A	-1.18356	5.89485	7.34752e-09	7.09399e-07
PPAPDC3	-0.842663	7.36333	0.000202104	0.00446586
REXO4	-0.542475	4.60451	0.00251982	0.0335465
PLCXD1	1.49281	2.49018	0.000121135	0.00289778
TXLNG	0.806572	2.9312	0.00211518	0.0292118
SCML1	0.535417	4.24253	0.0033146	0.0407877
CNKSR2	0.614077	3.1206	0.00404704	0.047505
KLHL34	0.973509	5.46603	3.95106e-06	0.000174253
ACOT9	0.787771	4.19982	8.1664e-06	0.000306011
SAT1	1.50133	3.93365	9.59301e-06	0.000347325
DYNLT3	0.859931	3.23092	0.0010971	0.0168931
DDX3X	0.802795	7.3393	7.8426e-05	0.00202528
TIMP1	1.22405	4.04869	0.000750886	0.0127734
CLCN5	1.97487	3.46686	7.10833e-16	4.23222e-13
AMER1	-0.85252	2.84068	0.00163533	0.0234303
MSN	1.00474	6.18769	3.27011e-05	0.000981674
AR	-0.554655	5.27054	0.00232472	0.0314572
STARD8	1.32363	4.09342	0.000108987	0.00267281
OGT	0.696897	6.90898	0.000415628	0.00804022
ARMCX4	1.23155	3.03432	2.49459e-05	0.00079567
ARMCX1	0.795505	4.85307	5.82401e-05	0.00159224
TSC22D3	-1.13016	6.65418	2.38201e-07	1.53484e-05
TMEM164	-0.96633	4.69826	9.83835e-07	5.1433e-05
LONRF3	2.34054	3.51082	2.54133e-11	4.61617e-09
SLC25A5	0.726428	3.93195	0.00105827	0.0165087
NKRF	0.757221	2.54785	0.00140921	0.0208024
TMEM187	-1.0799	1.97498	0.000265176	0.00562751
DDX3Y	0.758671	5.30106	9.02896e-06	0.000332107

## Sheet: CON vs ECC (Y)
Common Up-regulated										Common Down-regulated										Unique CON (up-regulated)						Uniique CON (down-regulated)						Unique ECC (up-regulated)
Gene	logFC CON	logCPM CON	Pvalue CON	FDR CON	logFC ECC	logCPM ECC	Pvalue ECC	FDR ECC		Gene	logFC CON	logCPM CON	Pvalue CON	FDR CON	logFC ECC	logCPM ECC	Pvalue ECC	FDR ECC		Gene	logFC	logCPM	PValue	FDR		Gene	logFC	logCPM	PValue	FDR		Gene	logFC	logCPM	PValue	FDR
ABHD2	1.6785	6.46098	1.3052e-07	3.24282e-05	2.81648	7.30962	3.95425e-16	3.29298e-13		ACVR2B	-0.906011	4.11436	0.000735305	0.0334932	-1.38868	3.88376	2.88444e-08	2.89138e-06		LOC102724428	3.641	4.42786	1.03823e-06	0.000195688		SEC14L5	-1.29636	2.65713	0.000474199	0.0246578		FAM20B	0.778813	5.84307	0.00212194	0.0330321
ABRA	2.66098	9.22829	6.95902e-11	7.6076e-08	3.26187	9.67495	7.41264e-32	8.02493e-28		ANGPT1	-1.02942	5.06366	7.1242e-05	0.005603	-0.879646	5.03182	0.000256738	0.00650924		TMEM140	0.905248	5.20895	0.000274585	0.0159668								GLUL	0.808071	9.81371	0.00356125	0.0489887
ACSL3	1.12955	6.07584	3.14763e-08	9.55832e-06	1.19716	6.03785	6.5398e-09	7.95504e-07		AQP4	-1.20642	6.61952	2.65045e-05	0.00254931	-1.04013	6.5865	0.000939056	0.0179933		DUSP4	1.27263	2.21113	0.000785968	0.035505								ANXA2P3	1.23253	2.40734	0.000201188	0.00539124
ACTC1	3.16012	6.28298	2.20714e-08	7.78336e-06	5.20759	8.13111	1.03948e-13	4.68893e-11		C1orf51	-2.39892	3.84502	1.19604e-08	4.43855e-06	-2.0901	3.81739	2.94307e-07	2.27583e-05														DSTNP2	0.952302	1.93662	0.0035851	0.0490718
AEN	2.00804	3.53288	1.10504e-05	0.00131308	3.04944	4.31987	6.78188e-11	1.3853e-08		CDCA7L	-1.10985	1.81798	0.000846948	0.0371841	-0.933082	1.79876	0.0030397	0.0434139														EIF5	0.677916	8.39143	0.00292821	0.0421553
AGPAT9	1.29201	5.91551	3.02091e-05	0.00282261	1.62631	6.07698	4.87509e-08	4.58937e-06		CPEB3	-0.726702	5.50675	0.000846152	0.0371841	-0.707164	5.43128	0.000662047	0.0137305														DNAJB1	1.27896	5.87661	0.00190707	0.0307587
AKR1C1	0.938238	4.9247	0.00132189	0.0498307	1.12874	4.96436	0.000968672	0.0183657		CTAGE5	-0.885053	5.25964	0.000175867	0.0112431	-0.987569	5.14159	1.80125e-05	0.000747139														NABP1	1.57166	2.01265	9.76421e-07	6.56567e-05
ALPK3	1.35323	9.87458	0.000288832	0.0167064	1.42108	9.8421	0.000122876	0.00373667		CXXC5	-1.0526	5.72647	2.18653e-05	0.00223393	-1.05724	5.64288	6.23581e-07	4.35541e-05														ANXA2P1	1.17978	2.52386	0.000183917	0.00504642
AMD1	0.944879	5.64017	0.000912624	0.0391247	1.25154	5.76197	2.63474e-08	2.69091e-06		DBP	-1.63973	3.98768	5.64716e-08	1.58294e-05	-1.2612	4.00495	5.48145e-06	0.000266108														ORAI2	1.08356	1.8646	0.000188474	0.0051313
AMPD3	2.28208	5.276	9.6928e-06	0.00116441	3.17841	5.96491	7.49429e-06	0.000348211		DDIT4	-1.34812	5.69162	0.000248039	0.014981	-2.02313	5.45052	1.29064e-06	8.17105e-05														ANGPT2	1.50812	2.34305	0.00107224	0.0199794
ANGPTL2	1.37933	6.66037	5.92029e-05	0.00494051	1.3049	6.51985	1.05328e-05	0.000461654		DUSP7	-0.849618	4.63694	0.000711844	0.0325602	-0.868953	4.5469	5.69632e-05	0.00191067														MFHAS1	1.13293	2.41225	0.00132786	0.0237295
ANKRD1	6.33533	10.526	3.4605e-14	7.56603e-11	7.17863	11.2748	3.99763e-22	1.08196e-18		FAM131B	-1.08069	2.64486	0.000293031	0.0168601	-1.03467	2.57968	0.000316276	0.00765996														VLDLR	0.702283	5.91862	0.00152535	0.0263793
ANKRD2	1.50894	7.30417	0.00120147	0.0465762	2.15663	7.72665	2.61192e-06	0.000146511		FAM46C	-1.85563	4.82933	1.34928e-10	1.34094e-07	-1.9286	4.73049	4.16712e-08	4.06426e-06
ANKRD37	1.3424	3.31157	0.000618086	0.0295062	2.06484	3.76767	9.29229e-12	2.28633e-09		GAB1	-1.53184	5.43902	3.24722e-06	0.000483781	-1.91539	5.2662	1.62613e-10	2.9307e-08
ARHGAP17	0.75266	4.97435	0.000150764	0.0101114	1.12511	5.13119	2.46581e-05	0.000963713		GADD45G	-2.10585	5.59472	4.28618e-06	0.000608526	-2.437	5.45677	7.1731e-07	4.91493e-05
ARID5A	1.97648	5.29094	7.26691e-07	0.00014989	2.82393	5.91306	2.60775e-15	2.01654e-12		GLRB	-0.85885	2.0104	0.00121187	0.0468134	-0.816822	1.94929	0.00330584	0.0463588
ARMCX1	0.863419	4.83881	2.89026e-05	0.00272382	0.986998	4.83467	6.4664e-06	0.00030704		HLF	-1.15242	3.75354	2.59257e-05	0.00253053	-1.25526	3.64071	2.52136e-05	0.000974866
ARNTL	2.34254	3.73356	5.22077e-10	3.56709e-07	1.97861	3.35244	4.21931e-07	3.06565e-05		HOXA11	-1.1211	2.66503	0.000984745	0.041226	-1.49481	2.48341	2.72991e-08	2.76206e-06
ARVCF	1.37876	4.8123	8.47478e-07	0.000168448	1.21072	4.60681	2.43779e-05	0.000959691		KBTBD13	-0.949445	4.93724	0.000498085	0.0252087	-0.751922	4.92493	0.00172885	0.0287602
ASB5	3.14933	10.7473	2.74806e-11	3.33798e-08	3.29401	10.7936	5.84243e-22	1.265e-18		KBTBD2	-0.969934	6.40816	1.37245e-05	0.00156287	-0.77961	6.39061	0.000694564	0.0142953
ATF3	5.01142	7.10883	2.23097e-09	9.75559e-07	5.54135	7.54177	1.31808e-20	2.13374e-17		LBX1	-1.14086	3.71578	0.00106574	0.0429914	-1.14288	3.63526	2.00753e-06	0.000116847
ATP1B3	0.931804	3.87427	0.000534146	0.0263031	0.926469	3.78467	2.20174e-05	0.000882818		LBX1-AS1	-1.2954	3.59873	0.00010741	0.00769145	-1.25796	3.52784	0.00042413	0.00958587
ATP2B1	0.663465	5.29167	0.000476454	0.0246578	0.717186	5.24094	0.000312585	0.00758755		LGALSL	-1.06158	5.76731	3.38676e-05	0.00311127	-0.911578	5.73268	5.50457e-05	0.00188584
AUTS2	1.87486	4.54172	1.98267e-09	9.75559e-07	2.64002	5.08334	9.89837e-13	3.45676e-10		MID1IP1	-1.09007	6.50656	0.000175002	0.0112431	-0.717857	6.55224	0.00269301	0.039398
BACH1	0.839614	5.15923	0.000810748	0.0361759	1.09747	5.24248	1.08276e-06	7.19139e-05		MOB3B	-1.22522	3.08842	0.000222535	0.0137444	-1.2879	2.99067	5.04611e-07	3.61783e-05
BMPR1A	0.946147	4.41693	5.81924e-06	0.000766457	0.944916	4.33116	1.82574e-05	0.000750282		NDRG3	-0.809276	3.89765	0.00125928	0.0483032	-0.857794	3.79902	0.00279748	0.0406517
BOK	1.06764	2.52558	0.00110948	0.0436802	0.995932	2.39149	0.00109135	0.0203007		NFKBIA	-0.801539	5.41528	0.000695626	0.0320869	-1.14816	5.21563	1.32029e-06	8.31016e-05
C14orf132	1.10103	2.57325	0.000559524	0.0273068	1.50852	2.75874	0.000116233	0.00354461		NR1D2	-1.34612	6.6009	3.73808e-08	1.10445e-05	-1.03206	6.61287	2.87137e-05	0.00108691
C2orf69	0.966523	4.31811	4.03874e-05	0.00358956	1.18113	4.37574	2.53334e-09	3.47163e-07		NR3C2	-0.921216	4.43769	2.31055e-05	0.00233879	-0.770204	4.40781	0.000295775	0.007294
CD68	1.28719	2.92206	0.00100864	0.0415246	2.05505	3.39448	6.27493e-09	7.71959e-07		P2RY1	-0.88047	3.52654	0.00126848	0.0484139	-0.94385	3.42402	0.000158646	0.00458001
CDC37L1	1.49087	6.7262	4.21257e-07	9.39832e-05	1.55547	6.68895	3.68741e-10	6.43869e-08		PER1	-1.65847	6.72867	2.14679e-07	4.99333e-05	-1.82756	6.6059	1.0831e-08	1.23428e-06
CDC42EP3	0.926665	5.41575	0.000797734	0.0358882	0.901002	5.31426	0.000145182	0.00423778		PER3	-1.7518	5.59753	1.16154e-11	1.81399e-08	-1.22446	5.65059	5.7006e-05	0.00191067
CDKN1A	4.23347	5.17315	2.27676e-20	2.48896e-16	4.48619	5.32413	6.4214e-18	6.95181e-15		PITX3	-1.19891	3.27589	0.00127102	0.0484139	-1.2334	3.18649	0.00022605	0.00588274
CEP170B	0.996815	3.05933	0.000254042	0.0151759	1.07998	3.02512	0.000162738	0.00464949		PLCL2	-0.906978	5.62791	1.17159e-05	0.00137719	-1.06714	5.49156	2.55019e-06	0.000144472
CHST15	2.18425	4.99623	1.78987e-07	4.25367e-05	2.60143	5.2554	1.02895e-13	4.68893e-11		RGMB	-0.793219	5.16709	6.82896e-05	0.00547812	-0.687768	5.12326	0.000115597	0.00353655
CHST3	1.62615	4.92244	6.26528e-09	2.53674e-06	1.53091	4.76488	2.31897e-05	0.000916384		RHOBTB1	-1.05947	7.78119	0.000252343	0.0151572	-0.947589	7.73289	0.000815371	0.0164075
CLCN5	1.1522	4.18389	0.000162977	0.0106687	0.978598	3.981	0.00233088	0.0354411		SGPL1	-0.91018	3.81039	0.000416315	0.0225305	-0.826037	3.75857	0.000355517	0.0083308
CLIP1	0.971731	8.76151	0.000452822	0.0237993	1.12856	8.78438	0.000473921	0.0104463		SLC12A2	-1.40362	5.58242	2.74603e-08	8.8293e-06	-1.11806	5.58264	1.10376e-05	0.000479891
COA7	0.81256	4.44436	0.00110602	0.0436802	0.800764	4.35166	0.000162771	0.00464949		TEF	-1.41299	5.92656	8.53223e-06	0.00105994	-0.933964	5.99017	9.94751e-05	0.00310351
CPEB4	1.67462	7.24335	4.51093e-05	0.00391377	2.4553	7.78816	1.49153e-14	8.9707e-12		TMEM57	-0.695783	5.42153	0.00112881	0.044072	-0.979881	5.23609	2.26114e-06	0.000129519
CRIM1	1.34286	6.72478	8.42593e-10	5.11735e-07	0.977337	6.38658	0.000170283	0.00477585		TOB2	-1.03954	6.67778	0.000181912	0.011562	-1.62766	6.42741	1.16319e-09	1.70172e-07
CRY1	1.28723	4.31818	2.77726e-05	0.00264009	1.68402	4.52064	3.4685e-12	1.01487e-09		UBALD2	-0.844589	4.71952	0.0011351	0.04416	-0.739627	4.67623	0.0011581	0.0212502
CSPG4	1.08524	4.41331	2.45215e-05	0.00245935	1.80697	4.84888	6.76472e-07	4.66464e-05		VSIG10	-0.818223	4.76398	0.000396362	0.0216652	-0.902604	4.65197	1.82962e-05	0.000750282
CYLD	0.9481	5.969	0.000632942	0.0298247	1.5082	6.27515	2.24408e-07	1.81301e-05
CYR61	2.1446	5.70752	8.7845e-05	0.00671117	3.33368	6.64749	9.98262e-09	1.1497e-06
DFNA5	1.39862	2.36834	6.97226e-06	0.0008761	1.26218	2.18458	0.0001812	0.00501145
DGKD	1.37735	7.08106	3.03105e-06	0.000466696	2.40233	7.80056	7.09105e-11	1.41812e-08
DIAPH1	1.52699	7.35613	1.27942e-09	7.36137e-07	1.75863	7.44732	1.09425e-09	1.64532e-07
DLG5	0.818511	5.33326	0.000630249	0.0298247	1.20049	5.50412	0.00033871	0.00805378
DNAJA1	0.84177	5.14615	0.00047818	0.0246578	0.990296	5.15712	2.02171e-07	1.64564e-05
DNAJB4	2.15337	8.08131	0.000159527	0.0105694	2.66264	8.42236	1.37637e-14	8.76504e-12
DOK7	1.08785	4.65372	0.000447447	0.0237451	1.28084	4.70201	2.97421e-05	0.00112191
DUSP16	0.815474	4.89427	0.000565317	0.0274669	0.915611	4.87344	0.000190128	0.00515872
DUSP8	1.84432	4.10547	0.000400275	0.0217702	2.02574	4.15986	5.82725e-05	0.00194709
DYNLT3	0.995794	3.59684	0.000961778	0.0405952	1.08189	3.56702	6.15687e-06	0.000293631
EGR1	2.35122	4.21336	0.000114521	0.00797416	3.45879	5.09074	1.74491e-08	1.88904e-06
EIF2AK3	2.04949	4.00237	2.10721e-06	0.000349358	2.20324	4.03596	9.16362e-10	1.39726e-07
EIF4E	2.01461	5.39384	4.6047e-05	0.00396366	2.77279	5.9412	1.61919e-11	3.72966e-09
ENAH	3.18366	8.09058	1.51062e-09	8.25707e-07	3.74313	8.51676	5.52998e-15	3.74172e-12
ENDOD1	1.0198	7.42476	1.64159e-05	0.00177682	1.39278	7.59988	1.92469e-08	2.04281e-06
ERO1L	1.31093	3.69431	4.80322e-06	0.00065636	1.59246	3.80933	8.80337e-09	1.03593e-06
ERRFI1	1.53776	4.3264	1.35318e-05	0.00155715	3.41059	5.80359	7.9297e-11	1.50609e-08
ETS2	0.97262	5.90478	2.59028e-05	0.00253053	0.749315	5.67442	0.00061011	0.0129005
FAM102A	2.361	3.7646	1.54611e-05	0.00169056	4.15004	5.27608	1.54656e-10	2.83781e-08
FAM110B	1.52674	4.66916	8.55669e-08	2.22718e-05	2.25169	5.15128	5.13182e-15	3.70381e-12
FAM134B	1.10562	8.18804	0.000112212	0.00786347	1.08457	8.08701	0.000191487	0.00516967
FNDC3B	1.44656	5.54085	7.61637e-09	2.97365e-06	1.5537	5.53151	1.7847e-08	1.91298e-06
FNIP1	0.652085	5.41115	0.00099329	0.0412876	0.662412	5.33246	0.000463959	0.0103138
FNIP2	2.17831	5.99576	2.10919e-06	0.000349358	3.22745	6.81398	1.1026e-17	1.08516e-14
FOS	2.50059	4.29307	0.000395829	0.0216652	3.34399	4.94108	6.96759e-08	6.50268e-06
GABARAPL1	1.28412	7.2336	1.68042e-07	4.08231e-05	1.37807	7.21591	4.71185e-08	4.52358e-06
GABARAPL3	1.16138	2.57773	0.000988037	0.041226	1.27081	2.56281	0.000176969	0.00491248
GADD45A	2.49985	4.0862	1.21804e-08	4.43855e-06	3.92034	5.26656	1.12116e-11	2.69726e-09
GDNF	1.41182	2.76855	0.000486291	0.0248578	1.96357	3.08713	5.67738e-07	3.99113e-05
GPSM2	2.27114	4.22109	3.5892e-06	0.000523162	3.46254	5.1688	2.92609e-14	1.50847e-11
HBEGF	2.68227	6.38204	2.69167e-08	8.8293e-06	3.56733	7.08742	1.37966e-20	2.13374e-17
HHATL	0.934365	8.05119	0.00108419	0.0433985	1.57519	8.41777	3.13717e-09	4.19297e-07
HSPA1A	2.2124	8.56281	3.9901e-05	0.00358956	3.70536	9.79489	1.65133e-10	2.9307e-08
HSPA1B	2.13228	8.36565	6.23772e-05	0.00508887	3.69754	9.65621	4.16811e-10	7.16254e-08
HSPB1	1.47979	9.76516	5.12046e-05	0.00437319	1.93625	10.0295	5.40043e-09	6.79826e-07
HSPB8	1.58824	10.1063	4.74609e-06	0.00065636	2.40908	10.6771	6.89832e-12	1.82149e-09
IDI1	1.05857	6.32988	0.000174734	0.0112431	0.774468	6.05952	0.000339232	0.00805378
IFRD1	2.23982	6.85111	5.55671e-06	0.000745983	3.05157	7.46175	4.79662e-12	1.33149e-09
IL12RB2	1.58293	2.79964	0.000259602	0.0154237	1.9746	2.99828	2.5659e-05	0.000987964
IL1R1	1.47261	4.91627	8.96296e-05	0.00671117	2.12681	5.32995	3.87744e-08	3.8161e-06
IL6R	1.60295	5.67857	4.61954e-07	0.000101002	2.6384	6.43122	6.16687e-11	1.30907e-08
KBTBD8	2.88492	3.65777	0.00013856	0.00940828	3.22479	3.86966	2.28082e-08	2.37425e-06
KCNC4	1.28435	3.20009	0.00065648	0.0306377	3.17885	4.63826	6.08269e-12	1.64628e-09
KCNQ4	2.02284	3.69132	1.27405e-06	0.000224644	1.9848	3.57092	1.58577e-06	9.69919e-05
KIAA0226	1.59098	4.58289	1.69466e-10	1.54384e-07	1.97311	4.78806	1.16315e-12	3.93508e-10
KLF5	1.23848	3.3309	0.00111078	0.0436802	3.17589	4.79957	7.20455e-11	1.41812e-08
KLHL29	1.48228	3.42942	5.98538e-06	0.000772697	1.65868	3.47072	7.41444e-06	0.000347484
KLHL34	1.50397	5.70335	0.00026777	0.0156789	1.42484	5.5638	0.000502258	0.0109186
KLHL40	3.19595	9.92615	4.43385e-08	1.27555e-05	4.26518	10.8355	3.99574e-12	1.13837e-09
KPNA1	0.888204	7.58856	1.93244e-05	0.00205101	1.07013	7.62426	2.77978e-07	2.16503e-05
LIMS1	1.14938	6.40248	2.65845e-05	0.00254931	1.71308	6.72842	9.10979e-08	8.21855e-06
LIMS3	1.29196	2.13462	0.000591279	0.0284751	1.95033	2.51711	1.00129e-06	6.69135e-05
LIMS3L	1.35757	3.69715	1.18853e-05	0.00138224	2.00894	4.09837	1.53133e-08	1.67456e-06
LINC00346	1.02766	6.06269	0.000440544	0.023608	1.77859	6.52355	1.17684e-06	7.58363e-05
LMCD1	1.56636	8.98381	0.000598285	0.0286862	2.54288	9.68438	2.30811e-08	2.37978e-06
LOC100271836	1.12319	3.86632	2.54528e-05	0.00252955	1.05678	3.73451	0.000588794	0.0124986
LOC101928841	3.07552	8.39865	3.27477e-06	0.000483781	4.80446	9.93437	1.28943e-09	1.86125e-07
LONRF3	2.57023	3.47661	2.14203e-09	9.75559e-07	3.06162	3.80796	4.07985e-14	2.00766e-11
LRRC8B	1.57115	3.98008	0.000224187	0.0137686	2.56619	4.68382	4.82994e-10	8.04446e-08
MAFF	4.55641	5.19412	4.16288e-10	3.03391e-07	4.89896	5.43286	1.32263e-13	5.72752e-11
MAFK	1.05788	5.39576	0.00015688	0.0104574	1.50211	5.62376	2.43934e-06	0.000138991
MAP3K14	1.11404	4.30143	0.000332307	0.0190198	2.02458	4.89162	1.40583e-09	2.00257e-07
MARS2	0.95242	3.60878	0.00108774	0.0433985	0.708589	3.36996	0.00342823	0.0475962
MAST4	2.07903	5.24411	2.56854e-06	0.000419093	2.98917	5.92663	1.82256e-12	5.9791e-10
MCF2L2	1.86575	3.25205	3.09683e-08	9.55832e-06	2.43163	3.61346	2.02423e-14	1.09571e-11
METTL1	1.06887	2.16096	0.00112058	0.0439076	1.26153	2.19964	0.000630644	0.0131893
MYC	2.73234	4.11818	1.54447e-06	0.000268002	3.74122	4.93173	8.45923e-12	2.12976e-09
MYOG	1.07264	6.39641	0.00052377	0.0261455	1.58319	6.67588	2.70322e-06	0.000150851
NEDD4	1.04311	7.77925	0.000167272	0.0108847	1.41547	7.95504	1.77936e-07	1.4818e-05
NEXN	0.805095	9.10523	0.000904493	0.0389288	1.02548	9.16415	5.14546e-05	0.00177404
NFIL3	2.4088	4.46045	7.34024e-10	4.72021e-07	2.55814	4.49727	2.86481e-12	8.86126e-10
NFKB2	0.859176	3.5222	0.000804058	0.0360244	0.739384	3.36164	0.000956435	0.0182295
NNMT	2.59598	3.72131	2.0814e-05	0.00215516	1.69076	2.91227	1.66882e-06	0.00010037
NR4A3	5.86483	7.39585	6.28073e-17	2.2887e-13	6.03267	7.47303	1.92968e-28	1.04453e-24
NT5DC3	1.17837	3.81826	0.000221137	0.0137356	1.96367	4.31092	7.53637e-11	1.45694e-08
NUDT4	1.60985	6.73442	4.36499e-05	0.00381745	2.85076	7.66924	4.29324e-10	7.26228e-08
NUDT4P1	1.54734	6.2506	5.91246e-05	0.00494051	2.74404	7.13799	2.53193e-09	3.47163e-07
NUDT4P2	1.55088	6.24647	3.08779e-05	0.00286066	2.73662	7.1248	4.4319e-09	5.71187e-07
OSBPL8	1.65571	5.3835	5.89435e-07	0.000123917	2.38784	5.87996	6.35249e-11	1.32254e-08
OSBPL9	1.22192	6.66869	0.000228744	0.01397	1.54591	6.81514	1.94e-06	0.000114144
OTUD1	3.5621	8.29367	7.66194e-07	0.000155112	4.35532	8.95395	2.3674e-12	7.53807e-10
P4HA1	0.873266	5.90368	0.00087871	0.0383201	1.11638	5.97996	1.28885e-05	0.000555902
PANX1	1.65527	5.69081	9.12437e-05	0.00678555	2.33879	6.15267	5.53042e-10	9.07157e-08
PCNT	1.09697	7.90461	1.40505e-05	0.00158351	0.839758	7.65097	0.000952036	0.0181777
PDE4D	1.11811	7.63339	7.09119e-05	0.005603	1.32957	7.69677	7.52756e-06	0.000348262
PEG10	2.1084	3.38396	0.000352243	0.0199519	2.17443	3.35282	1.26287e-07	1.10257e-05
PIM1	1.42923	3.96513	0.0010154	0.0415743	1.56255	3.97028	0.000331017	0.00794409
PKIG	0.799338	5.39042	0.000629884	0.0298247	0.929739	5.38676	0.000192058	0.00517219
PMP22	1.38075	6.31904	1.23884e-06	0.000222557	1.45936	6.2874	1.01467e-05	0.000450199
PNPLA8	0.950065	5.78518	0.000949119	0.0402161	1.36407	5.98421	3.5608e-07	2.65857e-05
PPAP2A	0.824996	5.38197	9.14031e-06	0.00111024	0.69086	5.21397	0.000160293	0.00461524
PPARGC1A	2.89778	8.21621	8.09534e-08	2.16169e-05	2.78641	8.03393	2.61906e-20	3.54425e-17
PPFIA4	1.43446	6.05411	6.60408e-05	0.00534783	1.6416	6.12281	2.57349e-05	0.000987964
PPP1R27	1.98153	8.75786	1.24186e-06	0.000222557	2.53405	9.13062	6.74255e-13	2.43316e-10
PPP2CA	0.905443	6.74065	0.000208107	0.0130002	1.02618	6.73525	1.1148e-06	7.27036e-05
PPP2R1B	0.896106	4.07676	6.1701e-05	0.00508887	0.635509	3.82875	0.00329108	0.0462117
PPTC7	0.793874	7.222	0.00039476	0.0216652	0.773728	7.12504	0.000427521	0.00960236
PRKAG2	3.6796	5.8131	3.50093e-12	6.37869e-09	2.95448	5.06993	2.56106e-13	1.02689e-10
PVR	1.241	5.7353	0.00100473	0.0415246	1.8239	6.07764	2.14864e-06	0.00012373
RAB15	2.51009	3.73441	2.44557e-10	2.05654e-07	3.87132	4.85545	1.74599e-14	9.94845e-12
RALGAPA1	0.611109	4.73285	0.00107346	0.0431436	0.727321	4.71794	0.000823822	0.016444
RALGAPA1P	0.703787	4.42226	0.000468449	0.0245028	0.760838	4.37133	0.000299175	0.00734094
RASSF5	1.60583	2.81682	3.78898e-06	0.000545015	1.97117	2.99652	2.28733e-07	1.83427e-05
RASSF8	1.01061	5.7753	0.000107303	0.00769145	1.70176	6.18526	4.76342e-08	4.52358e-06
RBM12	0.714254	4.85809	0.000486606	0.0248578	1.09806	5.02172	1.46114e-06	9.14351e-05
RBM20	1.31719	5.45402	1.18125e-06	0.000218872	1.93254	5.82964	5.63556e-10	9.10605e-08
RCAN1	0.962687	4.90038	0.000815324	0.0362322	2.33951	5.84914	3.18646e-09	4.2069e-07
RICTOR	1.14907	6.36653	3.85457e-05	0.00351151	1.15691	6.28535	3.01068e-06	0.000163787
RND3	2.48034	4.98997	2.63677e-06	0.000423899	3.3023	5.62075	1.30383e-11	3.06853e-09
RNF115	1.34193	6.57286	4.18046e-05	0.00368554	1.94091	6.9399	8.76706e-09	1.03593e-06
RNF34	1.0374	5.94642	6.37667e-06	0.000810579	1.3068	6.04733	1.82256e-11	4.11063e-09
RRAS2	1.10324	4.96504	0.00050429	0.0254051	1.57354	5.2137	3.05382e-07	2.32822e-05
RRP12	1.45465	5.56141	0.000497224	0.0252087	1.84329	5.77291	4.324e-06	0.000220809
SCN3B	1.31761	4.31993	6.86519e-05	0.00547812	1.01644	4.02911	0.00170798	0.0285868
SDC4	1.88361	6.35095	3.27011e-06	0.000483781	2.32126	6.61858	1.87928e-13	7.82503e-11
SDCBP	0.850033	5.88812	0.00101039	0.0415246	0.663869	5.685	0.000624563	0.0131292
SEC61A1	0.770201	6.47427	0.00010986	0.00774833	0.9584	6.50978	1.88164e-06	0.000111926
SGK1	1.25673	6.14558	0.00026153	0.0154543	1.50557	6.23865	1.11305e-09	1.65066e-07
SGMS2	1.81217	3.70243	5.87185e-05	0.00494051	2.89877	4.50959	7.3783e-12	1.90184e-09
SH2B3	0.979654	4.57369	0.000108645	0.00771235	1.92704	5.17313	1.47795e-10	2.75867e-08
SH3BP5	1.22724	2.71726	0.000443179	0.0236333	1.81547	3.04572	1.92145e-06	0.00011367
SIK1	3.55091	4.48063	2.86602e-06	0.000454078	4.35889	5.14977	6.01836e-10	9.44273e-08
SIK2	1.49391	5.15233	2.9687e-06	0.000463626	1.4771	5.05615	3.20704e-05	0.00119722
SLC15A4	0.875028	5.30871	0.000188099	0.0118178	1.05683	5.34343	6.73018e-06	0.00031817
SLC22A5	0.948163	4.36488	0.000553437	0.0271308	0.774503	4.16862	0.00132829	0.0237295
SLC38A1	1.91521	6.34469	1.61886e-11	2.21217e-08	1.84408	6.2033	4.47729e-07	3.23141e-05
SLC3A2	0.830192	5.31788	1.99156e-05	0.00209343	0.778314	5.20058	0.00010631	0.00328833
SLC7A1	1.49635	2.58493	0.00105425	0.0429914	2.26541	3.07521	2.08914e-06	0.000120947
SLMAP	1.03062	7.40976	0.00013963	0.00942243	1.1893	7.43405	8.94004e-07	6.04905e-05
SMC5	1.10767	5.40691	5.59556e-06	0.000745983	1.23058	5.40564	5.52905e-07	3.91225e-05
SMG1	0.785043	7.6112	0.000704343	0.0323524	0.771129	7.51719	0.000854278	0.0167975
SMG1P1	0.759359	4.20886	0.00105861	0.0429914	0.875733	4.19637	0.000265104	0.00669001
SMURF1	0.807787	4.3554	0.00035558	0.0200371	0.935518	4.35054	0.000143011	0.00419577
SNN	0.886417	6.10707	0.000571512	0.027645	1.83235	6.70009	5.53241e-09	6.88435e-07
SOCS6	0.986303	5.56011	8.89641e-05	0.00671117	1.65052	5.94698	5.8976e-10	9.38933e-08
SOCS7	1.60938	5.71169	3.02214e-09	1.27069e-06	1.58116	5.60646	1.10131e-08	1.24196e-06
SORT1	0.843385	7.41531	0.000122234	0.00841965	1.07458	7.48433	9.29777e-06	0.000419407
SPTSSA	1.03154	4.99276	9.35899e-07	0.000179496	1.16257	4.99612	2.51496e-09	3.47163e-07
SRPK2	0.936157	4.41113	0.000439619	0.023608	2.13997	5.20791	1.34882e-08	1.49003e-06
SRSF10	1.15259	5.9995	0.000968198	0.040709	0.961512	5.78332	2.73218e-05	0.0010415
STRIP2	1.02048	5.97637	6.21372e-05	0.00508887	1.22267	6.02917	1.96848e-06	0.000115193
SYNE1	0.785337	7.0821	0.00106229	0.0429914	0.723181	6.95735	0.00157937	0.0268941
SYNJ2	1.71288	3.5644	8.78155e-06	0.00107865	2.52352	4.12191	2.72199e-09	3.68353e-07
TGFB2	2.14897	5.12275	2.0602e-09	9.75559e-07	2.84632	5.62487	1.37392e-16	1.2395e-13
THOC6	1.12403	3.33247	1.54643e-05	0.00169056	1.53174	3.53023	4.34234e-09	5.66387e-07
TMEM38B	0.931078	7.26905	0.000187758	0.0118178	0.742692	7.06352	0.000251271	0.00641569
TMEM43	0.711911	5.59955	0.000840379	0.0371841	0.931622	5.65277	1.312e-05	0.00056364
TNFAIP3	1.12142	3.58383	6.00798e-06	0.000772697	1.37372	3.67128	1.42585e-07	1.2251e-05
TNFRSF12A	4.89285	6.3201	7.74325e-20	4.23246e-16	5.71466	7.03265	3.29042e-27	1.1874e-23
TNFRSF1B	0.962458	4.5119	8.05106e-05	0.00624214	0.648609	4.22844	0.00146853	0.0255656
TRIM38	0.947021	3.61467	0.000338709	0.0192852	0.918412	3.50736	0.000888314	0.0173277
UBA2	0.734658	6.5242	0.000395786	0.0216652	0.687892	6.4103	0.00105874	0.0198304
UBE2QL1	1.25215	5.84532	0.000132628	0.0090618	1.38598	5.85805	6.837e-05	0.00223111
USP28	1.51227	7.29653	8.78107e-07	0.000171419	1.86745	7.483	6.45666e-10	9.98569e-08
USP54	1.01291	7.13124	0.00023512	0.0142796	0.900921	6.97046	0.000354983	0.0083308
VEGFA	0.932818	7.622	0.000450617	0.0237978	0.825755	7.46651	0.000164232	0.00466661
VGLL2	2.54744	7.89097	2.15433e-15	5.88777e-12	2.89017	8.10521	5.39669e-20	6.49162e-17
WIPF3	1.4631	5.60965	5.35698e-07	0.000114829	1.63241	5.65081	1.04154e-05	0.000460232
WNT9A	2.1011	3.13429	8.9601e-05	0.00671117	2.68472	3.52786	4.70259e-09	5.98944e-07
XIRP1	4.22116	11.513	3.90912e-10	3.03391e-07	5.4446	12.6114	5.51956e-13	2.06051e-10
XIRP2	1.48821	12.112	0.000929429	0.0396895	2.31592	12.6819	3.50975e-07	2.63865e-05
ZC3H12A	1.32416	2.56833	0.000883956	0.0383469	1.95469	2.93915	1.50108e-06	9.3395e-05
ZNF385B	1.80874	3.64606	9.4102e-05	0.00695083	1.87694	3.61269	0.000284026	0.00707229
ZNF774	2.13243	2.85684	2.31336e-08	7.90301e-06	3.15975	3.63034	2.99386e-12	9.00319e-10

## Sheet: CON vs ECC (O)
Common Up-regulated										Common Down-regulated										Common Opposite										Unique CON (up-regulated)						Unique CON (down-regulated)						Unique ECC (up-regulated)						Unique ECC (down-regulated)
Gene	logFC CON	logCPM CON	Pvalue CON	FDR CON	logFC ECC	logCPM ECC	Pvalue ECC	FDR ECC		Gene	logFC CON	logCPM CON	Pvalue CON	FDR CON	logFC ECC	logCPM ECC	Pvalue ECC	FDR ECC		Gene	logFC CON	logCPM CON	Pvalue CON	FDR CON	logFC ECC	logCPM ECC	Pvalue ECC	FDR ECC		Gene	logFC	logCPM	PValue	FDR		Gene	logFC	logCPM	PValue	FDR		Gene	logFC	logCPM	PValue	FDR		Gene	logFC
AAK1	1.26358	4.38158	1.4405e-06	0.000163422	0.970074	4.00332	8.03221e-06	0.000302039		ABR	-0.637155	4.97454	0.000553273	0.0133733	-0.691245	4.91216	0.001075	0.016721		MYL12A	-1.15188	9.52036	2.12077e-05	0.00132261	0.83932	10.2956	0.00220458	0.0301744		FBLIM1	1.12437	1.80809	5.0669e-05	0.00253076		SPSB1	-1.00893	4.16484	0.000379042	0.0105839		PRDM2	1.07337	6.02074	0.00031024	0.00643102		OSBPL7	-0.832695
ABCA5	0.769885	6.49258	0.000942941	0.01918	0.735586	6.31165	0.00270792	0.0354344		ACHE	-0.766114	7.19631	0.000304045	0.00902633	-0.791396	7.15152	0.000422637	0.00811721												PTGFR	1.42497	2.48351	0.000379149	0.0105839		BTG2	-1.70378	7.03123	3.94185e-08	8.76703e-06		SLC9A1	0.999493	3.3575	0.000407764	0.00793933		GPRC5C	-0.884648
ABHD2	1.50153	6.07116	2.21599e-07	3.38028e-05	2.5503	6.62908	3.64706e-19	3.94683e-16		ACVR2B	-0.861578	3.82544	6.49096e-06	0.000519645	-0.780076	3.82249	0.000877922	0.0143644												VCAM1	1.0554	1.6286	6.80747e-05	0.00307371		DNAJC12	-0.872222	1.60999	0.00242633	0.0341927		ZNF326	0.707556	2.91812	0.00323086	0.0399367		STEAP3	-0.699945
ABHD3	0.902525	2.87796	0.0015746	0.0260235	1.10946	2.8261	0.000425157	0.00815099		AMER1	-0.731042	2.91012	0.000784015	0.0170849	-0.85252	2.84068	0.00163533	0.0234303												KCNN3	0.941931	4.7667	0.000117597	0.00460916		ANKRD2	-1.65687	7.60924	0.00108086	0.0207143		TMED5	0.626424	6.36285	0.000662908	0.0114587		FANCE	-0.75326
ACOT9	0.463922	4.16938	0.0026367	0.0360889	0.787771	4.19982	8.1664e-06	0.000306011		ANGPT1	-1.15559	5.04308	1.5824e-06	0.000176852	-1.50155	4.95903	7.43615e-10	9.83867e-08												C1orf85	0.721189	2.71912	0.00326831	0.0412209		SLC38A2	-1.32649	7.56081	6.87319e-10	3.38292e-07		GCLM	1.18308	4.87579	0.00101457	0.0160608
ACSL3	0.843742	5.92229	6.16146e-05	0.00287267	1.39767	6.08832	1.90051e-11	3.70323e-09		ANK1	-0.594147	8.87506	0.0029055	0.0381364	-0.627925	8.81374	0.00230839	0.0313734												TRAF5	0.972154	1.80125	0.00150847	0.0252636		C12orf75	-1.62431	3.95768	0.00110645	0.0209206		HIST2H2BE	0.607237	5.88609	0.000313677	0.00647721
ACTN1	0.971097	4.42135	1.04893e-05	0.000768851	0.976953	4.24771	0.000443932	0.00839087		AQP4	-1.11029	6.39769	9.95174e-08	1.70205e-05	-0.990109	6.41534	1.07959e-05	0.000384383												MARK1	0.908304	2.11905	0.00184312	0.0287818		HCFC1R1	-0.691832	7.20875	0.00304485	0.0392355		RASAL2	1.87076	5.26357	4.57837e-08	3.66167e-06
AGPAT9	1.01534	5.49642	0.000527186	0.0129649	1.50153	5.61787	6.56202e-10	8.90088e-08		ARG2	-1.3691	4.0943	0.000201503	0.00693466	-1.30391	4.11558	0.000877746	0.0143644												MAP3K8	0.957972	1.92273	0.00150235	0.0251984		MYL12A	-1.15188	9.52036	2.12077e-05	0.00132261		ESRRG	1.13388	4.54825	0.00252761	0.0336084
ALPK3	1.13493	10.0776	1.37287e-06	0.000159762	1.38356	10.0415	3.2267e-12	7.8592e-10		ARHGAP18	-0.94752	3.87581	6.19048e-07	8.37871e-05	-0.774266	3.9029	0.000369388	0.0073857												PLCE1	1.2364	3.89309	0.000249323	0.00804104		SMAD7	-0.727086	3.57612	0.00108937	0.0207356		LYPLAL1	0.611401	4.23672	0.00108932	0.0168568
AMPD3	1.50973	5.01515	2.22544e-06	0.000226949	2.75974	5.73364	2.27358e-14	9.61316e-12		ART1	-0.858377	5.3268	0.000419955	0.0111278	-0.788552	5.31565	0.00137731	0.0203595												LOXL4	1.28501	3.59437	8.63588e-06	0.000663141		ZFP36	-1.44812	4.9398	7.75469e-08	1.435e-05		LOC102723834	2.06383	3.98551	2.80003e-05	0.00086728
ANGPT2	1.16486	2.20026	0.000334214	0.00957578	1.08479	1.95742	0.00343477	0.0419731		ASB4	-0.617188	5.48903	0.000472213	0.0120596	-0.670295	5.42332	0.00240221	0.0322755												PAMR1	1.12405	2.15961	0.00406405	0.0473916		EFR3B	-0.855705	3.08299	0.000125767	0.00482876		EGLN1	0.698732	8.71532	0.000373613	0.00742859
ANGPTL2	1.40487	6.93455	1.16203e-09	4.85814e-07	0.803403	6.3592	0.000346651	0.00700954		C1orf51	-2.98208	3.93959	3.86633e-33	4.36431e-29	-3.19153	4.00728	6.9397e-32	7.43728e-28												ACCS	1.13353	1.98517	0.0019163	0.0294703		FBXO48	-0.809272	1.53751	0.00287043	0.037808		ACTN2	0.70152	12.8075	0.000608392	0.0107239
ANKRD1	3.96418	9.37963	3.63683e-06	0.000340421	5.27711	10.2977	7.07555e-13	2.29784e-10		C6orf203	-0.513975	3.85094	0.00382181	0.0458454	-0.688749	3.74116	0.000871742	0.0143289												ACP2	0.513323	3.59475	0.00311129	0.0398189		LRP1B	-1.23471	4.34735	0.00395895	0.0467944		ABI1	0.710338	4.74442	0.000574765	0.0102834
ANXA2	1.04799	5.70621	1.7657e-05	0.00113893	1.13046	5.57229	0.0001357	0.00320329		CA4	-0.962389	2.48573	0.00343347	0.0424501	-1.33236	2.38479	4.01015e-05	0.00116561												PTMS	0.638474	5.36105	0.000636261	0.0146321		CCDC141	-1.16155	4.09522	1.17543e-05	0.000834479		ARID5B	1.40071	6.24681	2.39569e-05	0.00077802
ANXA2P1	1.059	2.45291	0.000447075	0.0116819	1.10809	2.29748	0.00262713	0.0346172		CDNF	-0.561688	4.04537	0.00203536	0.030661	-0.697245	3.95232	0.000857581	0.0141395												CPNE8	0.941941	1.74901	0.00111826	0.0210032		BOLL	-0.72039	1.91428	0.00318963	0.0405914		SIRT1	1.01829	4.81535	3.64444e-05	0.00107596
ANXA2P2	1.08764	5.75346	2.87414e-06	0.000279684	1.15904	5.60987	3.8913e-05	0.00113632		CEBPB	-1.54524	7.04805	6.7613e-12	7.63216e-09	-1.44973	7.08121	3.25055e-09	3.355e-07												DDN	1.99336	9.10145	0.000541753	0.0131795		ASB18	-1.10963	1.54547	0.00373289	0.0451628		38412	0.652797	4.95551	0.000860038	0.0141583
ANXA2P3	1.18236	2.35779	4.32292e-05	0.00227254	1.18525	2.16431	0.00111036	0.0170729		CEP85	-0.599017	6.91174	0.000234119	0.00776329	-0.779157	6.80628	0.000638602	0.0111102												METTL7B	2.01012	2.53939	1.12339e-05	0.000802587		ACSS1	-0.852039	5.47515	0.000991804	0.0196412		DNMBP	1.22538	4.67694	5.24271e-05	0.00145938
ARHGAP17	0.691787	4.9402	5.02971e-05	0.00252335	1.24332	5.10208	1.29561e-12	3.85695e-10		CEP85L	-0.780338	4.15551	5.76197e-05	0.00277485	-0.592965	4.17916	0.00344273	0.0420225												ESYT1	0.821805	6.72592	0.00012093	0.00467486		ZNF341	-1.02261	2.08397	2.78083e-05	0.00165211		NT5C2	0.566844	6.84284	0.00348294	0.0421635
ARHGEF12	0.603354	7.04708	0.000240418	0.00783417	1.43127	7.38566	2.52234e-14	1.00118e-11		CHRNA10	-0.734003	5.37787	0.00130605	0.0230715	-0.768974	5.32735	0.00308745	0.0388333												DACH1	1.60801	2.17158	7.68999e-07	9.86416e-05		KCNB1	-0.927959	2.78242	0.00341915	0.0423195		WEE1	1.91759	4.54449	2.40613e-05	0.000779049
ARHGEF2	0.585875	4.28278	0.00308438	0.0395391	0.784337	4.24185	0.00352331	0.0425217		CNEP1R1	-0.508056	3.63667	0.00238953	0.033971	-0.692382	3.52399	0.00191185	0.0268888												UGGT2	1.00629	1.90963	7.48166e-05	0.00331298		FILIP1L	-0.684763	7.27385	0.0024325	0.0342027		EIF4G2	0.630466	9.56454	0.00231255	0.0313734
ARID5A	1.30967	5.32903	2.11607e-07	3.27208e-05	2.49569	5.9789	1.79666e-20	2.75069e-17		CNST	-0.652534	5.46334	0.000139514	0.0051465	-0.716055	5.39888	2.47508e-05	0.000791806												CCDC88C	1.0386	1.74674	0.000184215	0.00647794		ENAM	-0.68038	2.84169	0.00336729	0.0420464		CSRP3	1.53252	10.4365	2.46016e-05	0.000791757
ARMCX1	0.546629	4.86735	0.00134439	0.0234552	0.795505	4.85307	5.82401e-05	0.00159224		CTAGE5	-0.802201	5.11595	2.92081e-06	0.000281795	-0.906445	5.05236	6.27942e-06	0.000252995												MYO5A	0.715595	4.54002	0.00049366	0.0124108		DKFZp451B082	-1.2283	2.39042	0.00111757	0.0210032		FBXO3	0.866159	6.78341	0.000124582	0.00295385
[truncated: 287 more rows]
[truncated: 3 more columns]

## Sheet: Y vs O (CON)
Common Up-regulated										Common Down-regulated										Common Opposite										Unique Young (up-regulated)						Unique Young (down-regulated)						Unique Elderly (up-regulated)						Unique Elderly (down-regulated)
[truncated: 148 more rows]
[truncated: 3 more columns]

[truncated: 1 more sheets: Y vs O (ECC)]
