# Supplementary material for: The acute transcriptional response to resistance exercise: impact of age and contraction mode
Source: Aging (Albany NY). 2019 Apr 15;11(7):2111–26. doi: 10.18632/aging.101904 (PMC6503873; doi:10.18632/aging.101904)
Supplement: Supplementary Table S2 [file aging-11-101904-s003.xlsx]

## Sheet: Young post-CON (BP)
GO-ID	P-raw	P-corrected	Observed DE genes	Total genes in GO-ID	Total DE genes in GO analysis	Total genes in GO	GO description	Genes in test set
Up-regulated in young muscle 5 h post-CON exercise:
23052	3.5404e-06	0.0066481	62	1645	176	8006	signaling	GPSM2|CDKN1A|DGKD|KCNC4|PRKAG2|BACH1|DUSP16|RND3|NUDT4|ERO1L|PANX1|RASSF5|PDK4|ANKRD1|IL6R|TP63|DUSP4|IL1R1|PDE4D|RRAS2|AEN|WNT9A|FOS|DUSP8|TNFRSF1B|CDC42EP3|PPAP2A|ANGPTL2|SIK1|SIK2|HBEGF|ARHGAP17|PPP2CA|SDCBP|SH3BP5|TBL1X|SOCS6|PPARGC1A|SOCS7|SH2B3|IL12RB2|SRPK2|TGFB2|PLEKHA1|SORT1|SMURF1|EIF2AK3|RASSF8|USP28|VEGFA|NFKB2|DNAJA1|CYLD|RCAN1|GDNF|RAB15|NEDD4|DLG5|PMP22|ASB5|PKIG|BMPR1A
23033	6.9432e-06	0.0066481	48	1166	176	8006	signaling pathway	GPSM2|CDKN1A|DGKD|PRKAG2|BACH1|DUSP16|RND3|NUDT4|ERO1L|PPP2CA|SDCBP|SH3BP5|TBL1X|SOCS6|PPARGC1A|IL6R|SOCS7|SH2B3|TP63|IL12RB2|SRPK2|DUSP4|TGFB2|PLEKHA1|IL1R1|SORT1|SMURF1|EIF2AK3|RRAS2|AEN|WNT9A|FOS|DUSP8|TNFRSF1B|USP28|VEGFA|DNAJA1|CYLD|RCAN1|RAB15|NEDD4|DLG5|PPAP2A|SIK1|SIK2|ASB5|HBEGF|BMPR1A
32502	1.5445e-05	0.009859	63	1757	176	8006	developmental process	ERRFI1|CDKN1A|DGKD|ELN|WIPF3|ETS2|CYR61|ERO1L|SYNE1|ZMIZ1|PEG10|MYC|ZC3H12A|PIM1|ANKRD2|IL6R|TP63|MYOG|TNFRSF12A|IFRD1|ACSL3|WNT9A|FOS|KCNQ4|ANGPTL2|ALPK3|SIK1|VGLL2|CHST3|HBEGF|SDC4|PPP2CA|ARVCF|XIRP1|RICTOR|PCNT|PPARGC1A|SOCS7|SH2B3|SRPK2|EGR1|TGFB2|PLEKHA1|SORT1|SMURF1|EIF2AK3|CRIM1|SYNJ2|VEGFA|NFKB2|RCAN1|NR4A3|KLF5|ACTC1|GDNF|NEDD4|MAFF|PMP22|CSPG4|MAFK|LIMS1|DFNA5|BMPR1A
32501	2.3467e-05	0.010787	68	1975	176	8006	multicellular organismal process	ERRFI1|CDKN1A|DGKD|ELN|WIPF3|KCNC4|ETS2|CYR61|FAM134B|ZMIZ1|MYC|ZC3H12A|PIM1|ANKRD2|IL6R|TP63|MYOG|TNFRSF12A|IL1R1|IFRD1|ACSL3|WNT9A|FOS|PPAP2A|KCNQ4|ANGPTL2|ALPK3|SIK1|VGLL2|CHST3|HBEGF|SDC4|PPP2CA|SDCBP|ARVCF|XIRP1|RICTOR|TBL1X|PPARGC1A|SH2B3|IL12RB2|EGR1|TGFB2|PLEKHA1|SORT1|SMURF1|AKR1C1|EIF2AK3|CRIM1|SYNJ2|VEGFA|NFKB2|DNAJA1|RCAN1|DIAPH1|CLCN5|NR4A3|KLF5|ACTC1|GDNF|NEDD4|SLMAP|MAFF|PMP22|CSPG…
51789	2.8164e-05	0.010787	10	91	176	8006	response to protein stimulus	DNAJA1|EGR1|DNAJB4|EIF2AK3|HSPB1|FOS|HSPA1B|CYR61|HSPA1A|ERO1L
10646	3.3831e-05	0.010798	32	688	176	8006	regulation of cell communication	ERRFI1|AGPAT9|TNFAIP3|SLC7A1|DUSP16|ABRA|PPP2CA|PEG10|RICTOR|SOCS6|LMCD1|MCF2L2|IL6R|SOCS7|TP63|EGR1|TGFB2|PLEKHA1|RALGAPA1|SMURF1|EIF2AK3|DUSP8|VEGFA|CNKSR2|CYLD|GDNF|NEDD4|KCNQ4|TRIM38|MAP3K14|HBEGF|BMPR1A
50794	4.2871e-05	0.011728	110	3813	176	8006	regulation of cellular process	ERRFI1|DGKD|BACH1|ABRA|ETS2|NUDT4|ZMIZ1|RASSF5|PEG10|MYC|PDK4|PIM1|IL6R|TP63|KPNA1|IL1R1|RALGAPA1|FNDC3B|ARID5A|KCNQ4|SIK1|SIK2|ATF3|SDC4|ABHD2|ARHGAP17|SDCBP|SOCS6|PRODH|PPARGC1A|SOCS7|SRPK2|EGR1|HHATL|TGFB2|GADD45A|SMURF1|EIF2AK3|CRIM1|RASSF8|ESRRG|NFKB2|CYLD|RCAN1|NR4A3|GDNF|DLG5|MAFF|MAFK|PKIG|ZNF774|MAP3K14|BMPR1A|GPSM2|CDKN1A|PRKAG2|TNFAIP3|HSPB1|DUSP16|RND3|CYR61|PANX1|ANKRD1|LMCD1|MCF2L2|…
23034	5.3594e-05	0.012609	33	737	176	8006	intracellular signaling pathway	CDKN1A|DGKD|PRKAG2|BACH1|DUSP16|RND3|NUDT4|ERO1L|PPP2CA|SDCBP|SH3BP5|SOCS6|PPARGC1A|SOCS7|SH2B3|TP63|SRPK2|DUSP4|PLEKHA1|EIF2AK3|RRAS2|AEN|DUSP8|USP28|DNAJA1|RCAN1|RAB15|NEDD4|DLG5|PPAP2A|SIK1|SIK2|ASB5
6469	5.9261e-05	0.012609	9	80	176	8006	negative regulation of protein kinase activity	PPP2CA|ERRFI1|CDKN1A|GADD45A|SH3BP5|PRKAG2|PKIG|DUSP8|DUSP16
48518	7.1329e-05	0.01366	51	1383	176	8006	positive regulation of biological process	CDKN1A|PRKAG2|PVR|ABRA|ETS2|CYR61|PANX1|ZMIZ1|MYC|PIM1|LMCD1|IL6R|TP63|BOK|MYOG|TNFRSF12A|FNDC3B|RRAS2|AEN|FOS|ANGPTL2|VGLL2|ATF3|CHST3|HBEGF|SLC22A5|SDC4|ARNTL|PPP2CA|RICTOR|TBL1X|PRODH|PPARGC1A|EIF4E|IL12RB2|EGR1|TGFB2|PLEKHA1|SORT1|SMURF1|EIF2AK3|ESRRG|USP28|VEGFA|NR4A3|KLF5|GDNF|NEDD4|TRIM38|MAP3K14|BMPR1A
50789	9.0558e-05	0.015765	113	4007	176	8006	regulation of biological process	ERRFI1|DGKD|BACH1|PVR|ABRA|ETS2|NUDT4|ZMIZ1|RASSF5|PEG10|MYC|PDK4|PIM1|IL6R|TP63|KPNA1|IL1R1|RALGAPA1|FNDC3B|ARID5A|KCNQ4|SIK1|SIK2|ATF3|SLC22A5|SDC4|ABHD2|ARHGAP17|SDCBP|SOCS6|PRODH|PPARGC1A|SOCS7|SRPK2|EGR1|HHATL|TGFB2|GADD45A|SMURF1|EIF2AK3|CRIM1|RASSF8|ESRRG|NFKB2|CYLD|RCAN1|NR4A3|GDNF|DLG5|MAFF|MAFK|PKIG|ZNF774|MAP3K14|BMPR1A|GPSM2|CDKN1A|PRKAG2|TNFAIP3|HSPB1|DUSP16|RND3|CYR61|PANX1|ANKRD1|L…
33673	0.00010496	0.01675	9	86	176	8006	negative regulation of kinase activity	PPP2CA|ERRFI1|CDKN1A|GADD45A|SH3BP5|PRKAG2|PKIG|DUSP8|DUSP16
45682	0.00013819	0.019334	4	13	176	8006	regulation of epidermis development	ERRFI1|TGFB2|MAFF|TP63
51348	0.00014952	0.019334	9	90	176	8006	negative regulation of transferase activity	PPP2CA|ERRFI1|CDKN1A|GADD45A|SH3BP5|PRKAG2|PKIG|DUSP8|DUSP16
65007	0.00015144	0.019334	116	4187	176	8006	biological regulation	ERRFI1|DGKD|BACH1|PVR|ABRA|ETS2|NUDT4|ZMIZ1|RASSF5|PEG10|MYC|PDK4|PIM1|IL6R|TP63|KPNA1|IL1R1|RALGAPA1|FNDC3B|ARID5A|KCNQ4|SIK1|SIK2|ATF3|SLC22A5|SDC4|ABHD2|ARHGAP17|SDCBP|SOCS6|PRODH|PPARGC1A|SOCS7|SRPK2|EGR1|HHATL|TGFB2|GADD45A|SMURF1|EIF2AK3|CRIM1|RASSF8|ESRRG|NFKB2|CYLD|RCAN1|NR4A3|GDNF|DLG5|MAFF|MAFK|PKIG|ZNF774|MAP3K14|BMPR1A|GPSM2|CDKN1A|PRKAG2|TNFAIP3|HSPB1|DUSP16|RND3|CYR61|SYNE1|PANX1|AN…
2053	0.00019016	0.022005	4	14	176	8006	positive regulation of mesenchymal cell proliferation	MYC|TP63|VEGFA|BMPR1A
48522	0.00019783	0.022005	47	1288	176	8006	positive regulation of cellular process	CDKN1A|SDC4|PRKAG2|ABRA|ETS2|CYR61|ARNTL|PANX1|PPP2CA|ZMIZ1|MYC|PIM1|RICTOR|TBL1X|PRODH|PPARGC1A|LMCD1|IL6R|EIF4E|TP63|IL12RB2|BOK|MYOG|EGR1|TGFB2|TNFRSF12A|SORT1|SMURF1|FNDC3B|EIF2AK3|RRAS2|AEN|ESRRG|FOS|USP28|VEGFA|NR4A3|KLF5|GDNF|NEDD4|TRIM38|VGLL2|MAP3K14|ATF3|CHST3|HBEGF|BMPR1A
7165	0.00021585	0.022005	40	1037	176	8006	signal transduction	GPSM2|CDKN1A|DGKD|PRKAG2|ARHGAP17|BACH1|DUSP16|RND3|NUDT4|PPP2CA|SDCBP|RASSF5|PDK4|ANKRD1|SH3BP5|SOCS6|IL6R|SRPK2|DUSP4|PLEKHA1|IL1R1|PDE4D|EIF2AK3|RASSF8|RRAS2|WNT9A|FOS|DUSP8|USP28|NFKB2|RCAN1|GDNF|RAB15|DLG5|CDC42EP3|ANGPTL2|SIK1|SIK2|PKIG|HBEGF
7275	0.00022247	0.022005	55	1598	176	8006	multicellular organismal development	ERRFI1|CDKN1A|DGKD|ELN|WIPF3|ETS2|CYR61|ZMIZ1|MYC|ZC3H12A|PIM1|ANKRD2|IL6R|TP63|MYOG|TNFRSF12A|IFRD1|ACSL3|WNT9A|FOS|KCNQ4|ANGPTL2|ALPK3|SIK1|VGLL2|CHST3|HBEGF|SDC4|PPP2CA|ARVCF|XIRP1|RICTOR|SH2B3|EGR1|TGFB2|PLEKHA1|SORT1|SMURF1|EIF2AK3|CRIM1|SYNJ2|VEGFA|NFKB2|RCAN1|NR4A3|KLF5|ACTC1|GDNF|NEDD4|MAFF|PMP22|CSPG4|MAFK|DFNA5|BMPR1A
9966	0.00022982	0.022005	24	500	176	8006	regulation of signal transduction	ERRFI1|TGFB2|PLEKHA1|AGPAT9|RALGAPA1|EIF2AK3|TNFAIP3|DUSP8|SLC7A1|DUSP16|ABRA|VEGFA|CNKSR2|PPP2CA|NEDD4|RICTOR|TRIM38|SOCS6|LMCD1|MCF2L2|IL6R|SOCS7|MAP3K14|HBEGF
23051	0.00025136	0.022922	24	503	176	8006	regulation of signaling process	ERRFI1|TGFB2|PLEKHA1|AGPAT9|RALGAPA1|EIF2AK3|TNFAIP3|DUSP8|SLC7A1|DUSP16|ABRA|VEGFA|CNKSR2|PPP2CA|NEDD4|RICTOR|TRIM38|SOCS6|LMCD1|MCF2L2|IL6R|SOCS7|MAP3K14|HBEGF
9266	0.00028652	0.02494	7	59	176	8006	response to temperature stimulus	DNAJA1|HSPB8|DNAJB4|HSPB1|FOS|VEGFA|ERO1L
90183	0.00034256	0.028522	3	7	176	8006	regulation of kidney development	GDNF|MYC|VEGFA
42692	0.00041468	0.029359	8	82	176	8006	muscle cell differentiation	MYOG|RCAN1|ACTC1|SORT1|IFRD1|XIRP1|VEGFA|SYNE1
23046	0.00041586	0.029359	42	1143	176	8006	signaling process	GPSM2|CDKN1A|DGKD|KCNC4|PRKAG2|ARHGAP17|BACH1|DUSP16|RND3|NUDT4|PPP2CA|SDCBP|RASSF5|PDK4|ANKRD1|SH3BP5|SOCS6|IL6R|SRPK2|DUSP4|PLEKHA1|IL1R1|PDE4D|EIF2AK3|RASSF8|RRAS2|WNT9A|FOS|DUSP8|USP28|NFKB2|RCAN1|GDNF|RAB15|DLG5|CDC42EP3|PMP22|ANGPTL2|SIK1|SIK2|PKIG|HBEGF
23060	0.00041586	0.029359	42	1143	176	8006	signal transmission	GPSM2|CDKN1A|DGKD|KCNC4|PRKAG2|ARHGAP17|BACH1|DUSP16|RND3|NUDT4|PPP2CA|SDCBP|RASSF5|PDK4|ANKRD1|SH3BP5|SOCS6|IL6R|SRPK2|DUSP4|PLEKHA1|IL1R1|PDE4D|EIF2AK3|RASSF8|RRAS2|WNT9A|FOS|DUSP8|USP28|NFKB2|RCAN1|GDNF|RAB15|DLG5|CDC42EP3|PMP22|ANGPTL2|SIK1|SIK2|PKIG|HBEGF
10464	0.00042937	0.029359	4	17	176	8006	regulation of mesenchymal cell proliferation	MYC|TP63|VEGFA|BMPR1A
6986	0.00043163	0.029359	7	63	176	8006	response to unfolded protein	DNAJA1|DNAJB4|EIF2AK3|HSPB1|HSPA1B|HSPA1A|ERO1L
61061	0.0004446	0.029359	13	200	176	8006	muscle structure development	MYOG|TGFB2|SORT1|IFRD1|VEGFA|SYNE1|RCAN1|ACTC1|XIRP1|ANKRD2|VGLL2|TP63|HBEGF
48513	0.00050031	0.031212	37	971	176	8006	organ development	ERRFI1|CDKN1A|ELN|CYR61|PPP2CA|ZMIZ1|MYC|ZC3H12A|XIRP1|ANKRD2|IL6R|SH2B3|TP63|MYOG|EGR1|TGFB2|TNFRSF12A|PLEKHA1|SMURF1|EIF2AK3|ACSL3|WNT9A|SYNJ2|VEGFA|NFKB2|RCAN1|NR4A3|KLF5|ACTC1|GDNF|KCNQ4|ALPK3|CSPG4|VGLL2|HBEGF|DFNA5|BMPR1A
50896	0.00050526	0.031212	56	1688	176	8006	response to stimulus	ERRFI1|SMG1|CDKN1A|DGKD|HSPB8|HSPB1|SMC5|BACH1|CYR61|ERO1L|PANX1|MYC|ANKRD1|PIM1|IL6R|TP63|DUSP4|IL1R1|AEN|ACSL3|WNT9A|FOS|TNFRSF1B|CRY1|ANGPTL2|SGK1|CHST3|SLC22A5|ABHD2|PPP2CA|SNN|NFIL3|DNAJB4|SOCS6|PPARGC1A|SOCS7|IL12RB2|EGR1|TGFB2|PLEKHA1|GADD45A|SORT1|AKR1C1|EIF2AK3|USP28|VEGFA|NFKB2|DNAJA1|NR4A3|ACTC1|GDNF|NEDD4|MAFF|HSPA1B|HSPA1A|BMPR1A
10033	0.00067063	0.03964	24	538	176	8006	response to organic substance	DUSP4|EGR1|CDKN1A|TGFB2|DGKD|IL1R1|SORT1|EIF2AK3|HSPB1|ACSL3|FOS|CYR61|ERO1L|PANX1|PPP2CA|DNAJA1|NR4A3|ACTC1|DNAJB4|IL6R|SOCS7|HSPA1B|IL12RB2|HSPA1A
51174	0.00070378	0.03964	18	352	176	8006	regulation of phosphorus metabolic process	ERRFI1|CDKN1A|TGFB2|DGKD|SDC4|GADD45A|PRKAG2|DUSP8|DUSP16|VEGFA|PPP2CA|RCAN1|PPAP2A|PIM1|SH3BP5|PKIG|IL6R|BMPR1A
19220	0.00070378	0.03964	18	352	176	8006	regulation of phosphate metabolic process	ERRFI1|CDKN1A|TGFB2|DGKD|SDC4|GADD45A|PRKAG2|DUSP8|DUSP16|VEGFA|PPP2CA|RCAN1|PPAP2A|PIM1|SH3BP5|PKIG|IL6R|BMPR1A
48856	0.0007649	0.041594	49	1442	176	8006	anatomical structure development	ERRFI1|CDKN1A|ELN|ETS2|CYR61|SYNE1|ZMIZ1|MYC|ZC3H12A|ANKRD2|IL6R|TP63|MYOG|TNFRSF12A|IFRD1|ACSL3|WNT9A|FOS|KCNQ4|ALPK3|VGLL2|CHST3|HBEGF|SDC4|PPP2CA|XIRP1|PCNT|SH2B3|EGR1|TGFB2|PLEKHA1|SORT1|SMURF1|EIF2AK3|CRIM1|SYNJ2|VEGFA|NFKB2|RCAN1|NR4A3|KLF5|ACTC1|GDNF|NEDD4|PMP22|CSPG4|MAFK|DFNA5|BMPR1A
45604	0.00079581	0.041594	3	9	176	8006	regulation of epidermal cell differentiation	ERRFI1|MAFF|TP63
42221	0.00080365	0.041594	33	852	176	8006	response to chemical stimulus	CDKN1A|SLC22A5|DGKD|HSPB1|CYR61|ERO1L|PANX1|PPP2CA|MYC|DNAJB4|PIM1|IL6R|SOCS7|IL12RB2|DUSP4|EGR1|TGFB2|PLEKHA1|IL1R1|SORT1|AKR1C1|EIF2AK3|ACSL3|WNT9A|FOS|VEGFA|DNAJA1|NR4A3|ACTC1|NEDD4|ANGPTL2|HSPA1B|HSPA1A
45859	0.00086416	0.043549	14	242	176	8006	regulation of protein kinase activity	ERRFI1|CDKN1A|TGFB2|DGKD|SDC4|GADD45A|PRKAG2|DUSP8|DUSP16|PPP2CA|PPAP2A|PIM1|SH3BP5|PKIG
48731	0.0010418	0.048097	45	1308	176	8006	system development	ERRFI1|CDKN1A|ELN|ETS2|CYR61|PPP2CA|ZMIZ1|MYC|ZC3H12A|XIRP1|ANKRD2|IL6R|SH2B3|TP63|MYOG|EGR1|TGFB2|TNFRSF12A|PLEKHA1|SORT1|SMURF1|EIF2AK3|CRIM1|ACSL3|WNT9A|FOS|SYNJ2|VEGFA|NFKB2|RCAN1|NR4A3|KLF5|ACTC1|GDNF|NEDD4|PMP22|KCNQ4|ALPK3|CSPG4|MAFK|VGLL2|CHST3|HBEGF|DFNA5|BMPR1A
55002	0.0010522	0.048097	5	36	176	8006	striated muscle cell development	MYOG|RCAN1|ACTC1|XIRP1|VEGFA
48869	0.0010698	0.048097	34	902	176	8006	cellular developmental process	WIPF3|ERO1L|SYNE1|ZMIZ1|PEG10|ZC3H12A|XIRP1|PCNT|PPARGC1A|SOCS7|SH2B3|TP63|SRPK2|MYOG|EGR1|TGFB2|TNFRSF12A|SORT1|SMURF1|IFRD1|EIF2AK3|WNT9A|VEGFA|NFKB2|RCAN1|ACTC1|GDNF|NEDD4|PMP22|ANGPTL2|CSPG4|CHST3|DFNA5|BMPR1A
42325	0.0010801	0.048097	17	335	176	8006	regulation of phosphorylation	ERRFI1|CDKN1A|TGFB2|DGKD|SDC4|GADD45A|PRKAG2|DUSP8|DUSP16|VEGFA|PPP2CA|PPAP2A|PIM1|SH3BP5|PKIG|IL6R|BMPR1A
32006	0.0011186	0.048097	3	10	176	8006	regulation of TOR signaling cascade	AGPAT9|RICTOR|SLC7A1
48730	0.0011186	0.048097	3	10	176	8006	epidermis morphogenesis	ERRFI1|TGFB2|TP63
30154	0.0011302	0.048097	33	869	176	8006	cell differentiation	WIPF3|ERO1L|SYNE1|ZMIZ1|PEG10|ZC3H12A|XIRP1|PPARGC1A|SOCS7|SH2B3|TP63|SRPK2|MYOG|EGR1|TGFB2|TNFRSF12A|SORT1|SMURF1|IFRD1|EIF2AK3|WNT9A|VEGFA|NFKB2|RCAN1|ACTC1|GDNF|NEDD4|PMP22|ANGPTL2|CSPG4|CHST3|DFNA5|BMPR1A
Down-regulated in young muscle 5 h post-CON exercise:
65007	7.017e-08	5.7067e-05	39	4187	43	8006	biological regulation	RASL12|HLF|NDRG3|MSTN|CDCA7L|AQP4|TOB2|CXXC5|RHOBTB1|NR3C2|HOXA11|SGPL1|SERTAD3|DBP|NPHP1|P2RY1|SKIL|PITX3|SLC12A2|MYLIP|ARHGEF37|ANGPT1|MID1IP1|GAB1|NR1D2|RGMB|LBX1|ACVR2B|MPP7|DUSP7|GADD45G|NFKBIA|PDP1|PER1|PER3|TEF|GLRB|DDIT4|TRIB1
48511	1.1718e-07	5.7067e-05	7	75	43	8006	rhythmic process	PER1|DBP|HLF|PER3|MSTN|ANGPT1|TEF
50789	4.3831e-06	0.001251	36	4007	43	8006	regulation of biological process	RASL12|HLF|NDRG3|MSTN|CDCA7L|TOB2|CXXC5|RHOBTB1|NR3C2|HOXA11|SGPL1|SERTAD3|DBP|NPHP1|P2RY1|SKIL|PITX3|MYLIP|ARHGEF37|ANGPT1|MID1IP1|GAB1|NR1D2|RGMB|LBX1|ACVR2B|MPP7|DUSP7|GADD45G|NFKBIA|PDP1|PER1|PER3|TEF|DDIT4|TRIB1
50794	5.1378e-06	0.001251	35	3813	43	8006	regulation of cellular process	RASL12|HLF|NDRG3|MSTN|CDCA7L|TOB2|CXXC5|RHOBTB1|NR3C2|HOXA11|SERTAD3|DBP|NPHP1|P2RY1|SKIL|PITX3|MYLIP|ARHGEF37|ANGPT1|MID1IP1|GAB1|NR1D2|RGMB|LBX1|ACVR2B|MPP7|DUSP7|GADD45G|NFKBIA|PDP1|PER1|PER3|TEF|DDIT4|TRIB1
51239	0.00011262	0.021939	11	551	43	8006	regulation of multicellular organismal process	NFKBIA|MYLIP|SGPL1|HLF|MSTN|P2RY1|TOB2|LBX1|SKIL|ACVR2B|HOXA11
7166	0.00017259	0.028017	11	578	43	8006	cell surface receptor linked signaling pathway	SLC12A2|NFKBIA|SGPL1|MSTN|ANGPT1|GLRB|P2RY1|GAB1|ITGB6|RGMB|ACVR2B

## Sheet: Young post-ECC (BP)
GO-ID	P-raw	P-corrected	Observed DE genes	Total genes in GO-ID	Total DE genes in GO analysis	Total genes in GO	GO description	Genes in test set
Up-regulated in young muscle 5 h post-ECC exercise:
42221	3.8238e-10	7.7099e-07	95	855	470	7935	response to chemical stimulus	ATF1|CDKN1A|DGKD|SRXN1|CITED2|HSPB7|HSPB1|ADM|IRS2|PRDM2|VLDLR|CYR61|ERO1L|PANX1|THBD|PLAU|MYC|PIM1|JAK2|JUNB|GLUL|IL6R|CTSB|MAP2K1|HSP90AA1|TPM4|GPX3|IL1R1|TRAFD1|WNT9A|FOS|ACSL3|GLRX2|OSMR|ETV5|TNFRSF1A|ALDH1A3|ADAM17|LATS2|NPC1|TEP1|DDIT3|RARA|ANGPTL2|CRYAB|TP53|CD44|PPARD|PPP1R15A|SLC22A5|SEMA3C|TULP4|ATP1A1|HIF1A|HDAC9|PPP2CA|DNAJB1|PPP2CB|HSPH1|MAT2A|S100A16|DNAJB5|DNAJB4|SERPINH1|UBQLN1|ST…
23052	5.3652e-10	7.7099e-07	152	1636	470	7935	signaling	ATF1|DGKD|FAM13B|NAB2|RAPH1|IRS2|CBLB|BACH1|ERO1L|NUDT4|PLAU|RASSF5|MAP3K8|IL6R|SOX4|SH3GL1|MAP2K3|TLE4|CD97|CAST|MAP2K1|IL1R1|STARD8|DAPK3|ARID5B|ADAM17|MAPKAPK3|TEP1|DDIT3|S100A6|SIK1|SIK2|TP53|XPR1|RRAD|ARHGAP17|DTX4|HIF1A|CORO1C|SDCBP|PLXNA2|TP53BP2|SOCS6|PPARGC1A|SOCS7|SRPK2|TGFB2|SMAD3|HOMER1|GADD45B|HSPA5|HOMER2|SMURF1|EIF2AK3|RASSF8|LNPEP|MAFA|NFKB2|CYLD|BCL9|RCAN1|NR4A1|GDNF|CDK4|DLG5|PL…
10033	3.1101e-09	2.9795e-06	67	541	470	7935	response to organic substance	ATF1|CDKN1A|DGKD|HSPB7|HSPB1|ADM|IRS2|PRDM2|VLDLR|CYR61|ERO1L|PANX1|THBD|JAK2|JUNB|GLUL|IL6R|CTSB|MAP2K1|HSP90AA1|GPX3|IL1R1|TRAFD1|FOS|ACSL3|GLRX2|OSMR|TNFRSF1A|ADAM17|LATS2|TEP1|DDIT3|RARA|CRYAB|CD44|PPARD|PPP1R15A|HDAC9|PPP2CA|DNAJB1|HSPH1|MAT2A|DNAJB5|DNAJB4|SERPINH1|SOCS7|IL12RB2|AKIRIN2|EGR1|TGFB2|ANGPT2|SMAD3|HSPA1L|HSPA5|SORT1|EIF2AK3|MAFA|SSH1|COL1A1|DNAJA1|FABP3|NR4A3|ACTC1|AGO2|HSPA1B|…
51789	1.1616e-08	8.3463e-06	22	92	470	7935	response to protein stimulus	PPP1R15A|EGR1|HSP90AA1|ANGPT2|HSPA1L|HSPA5|HSPB7|EIF2AK3|HSPB1|FOS|CYR61|ERO1L|DNAJA1|DNAJB1|HSPH1|DNAJB5|DDIT3|DNAJB4|SERPINH1|HSPA1B|HSPA1A|CTSB
32502	1.7122e-08	9.8416e-06	155	1759	470	7935	developmental process	ATF1|ERRFI1|DGKD|WIPF3|NAB2|IRS2|ETS2|ERO1L|LOXL2|PLAU|MYC|PEG10|ZC3H12A|PIM1|SOX9|PKNOX1|SCXB|JUNB|LZTS1|IL6R|SOX4|IER3|SH3GL1|MAP2K1|DAPK3|USP2|IFRD1|DYRK1A|ARID5B|ACSL3|ADAM17|SOAT1|TEP1|DDIT3|S100A6|KCNQ4|ALPK3|SIK1|TP53|VCL|SDC4|HIF1A|GLIS2|UGCG|S100A16|PLXNA2|PPARGC1A|SOCS7|SRPK2|AKIRIN2|EGR1|TGFB2|JUND|SMAD3|HOMER1|GADD45B|HSPA5|SMURF1|EIF2AK3|CRIM1|SYNJ2|NFKB2|SSH1|COL1A1|RCAN1|NR4A3|GDNF…
48646	2.2225e-08	1.0646e-05	40	262	470	7935	anatomical structure formation involved in morphogenesis	ATF1|SEMA3C|CITED2|ADM|SHB|CYR61|GNA13|ADAMTS1|PLAU|ZC3H12A|PLXNA2|XIRP1|PKNOX1|JUNB|NKX3-1|SPEN|TGFB2|SMAD3|RBM15|ANXA2|TNFRSF12A|TBX3|VEGFA|COL1A1|ALDH1A3|KLF5|NR4A3|ACTC1|GDNF|TEP1|PMP22|MYH9|CSPG4|ANXA2P2|ITGA5|NAA15|TP53|CD44|BMPR1A|FGFR1
48513	3.7538e-08	1.3595e-05	98	973	470	7935	organ development	ATF1|ERRFI1|NAB2|IRS2|PLAU|MYC|ZC3H12A|SOX9|PKNOX1|JUNB|IL6R|SOX4|MAP2K1|USP2|ARID5B|ACSL3|ADAM17|TEP1|DDIT3|KCNQ4|ALPK3|TP53|VCL|HIF1A|UGCG|S100A16|PLXNA2|EGR1|TGFB2|SMAD3|HOMER1|HSPA5|SMURF1|EIF2AK3|SYNJ2|NFKB2|COL1A1|RCAN1|NR4A3|GDNF|CSPG4|ANXA2P2|BMPR1A|FGFR1|CSRNP1|CDKN1A|CITED2|ADM|LAMC1|SHB|CYR61|CSRP3|HEY1|ADAMTS1|ITGAV|TIMP1|ANKRD2|JAK2|NKX3-1|CTSB|MYOG|EDARADD|RBM15|ANXA2|TNFRSF12A|WNT9…
48731	4.0211e-08	1.3595e-05	122	1304	470	7935	system development	ATF1|ERRFI1|NAB2|IRS2|ETS2|PLAU|MYC|ZC3H12A|SOX9|PKNOX1|JUNB|LZTS1|IL6R|SOX4|SH3GL1|MAP2K1|DAPK3|USP2|DYRK1A|ARID5B|ACSL3|ADAM17|TEP1|DDIT3|S100A6|KCNQ4|ALPK3|TP53|VCL|HIF1A|GLIS2|UGCG|S100A16|PLXNA2|EGR1|TGFB2|JUND|SMAD3|HOMER1|HSPA5|SMURF1|EIF2AK3|CRIM1|SYNJ2|NFKB2|COL1A1|RCAN1|NR4A3|GDNF|STRN|CSPG4|MAFK|ANXA2P2|BMPR1A|FGFR1|CSRNP1|CDKN1A|CITED2|ADM|VLDLR|LAMC1|SHB|CYR61|CSRP3|HEY1|ADAMTS1|ITGA…
50794	4.2572e-08	1.3595e-05	280	3770	470	7935	regulation of cellular process	ATF1|ERRFI1|RAPH1|HNRNPU|JMJD1C|TXNDC11|CBLB|ENO1|GABPB1|BACH1|BACH2|ABRA|NUDT4|MYC|RASSF5|PEG10|SOX9|PKNOX1|JUNB|SOX4|IER3|IL1R1|SFMBT1|STARD8|ACTN1|DAPK3|FNDC3B|SOAT1|TEP1|DDIT3|KCNQ4|SIK1|SIK2|TP53|ATF3|SDC4|RRAD|HIF1A|ARPP19|TP53BP2|PPARGC1A|SRPK2|EGR1|JUND|HOMER1|GADD45B|GADD45A|PLK2|EAF1|EIF2AK3|RASSF8|ELL2|COL1A1|CYLD|EIF5|FUBP1|AGO2|STRN|PKIG|CSRNP1|CDKN1A|CITED2|PRKAG2|ADM|VLDLR|SHB|PANX…
9607	5.4567e-08	1.5683e-05	35	219	470	7935	response to biotic stimulus	PPP1R15A|ODC1|HSPB7|HSPB1|ADM|ENO1|VLDLR|PPM1D|ERO1L|THBD|DNAJB1|HSPH1|DNAJB5|DNAJB4|SERPINH1|IL6R|IL12RB2|AKIRIN2|HSP90AA1|SMAD3|HSPA1L|HSPA5|GPX3|EIF2AK3|FOS|TNFRSF1A|DNAJA1|TMEM233|ADAM17|DDIT3|ABCE1|TP53|HSPA1B|XPR1|HSPA1A
6986	6.2936e-08	1.6443e-05	17	62	470	7935	response to unfolded protein	PPP1R15A|HSP90AA1|HSPA1L|HSPA5|HSPB7|EIF2AK3|HSPB1|ERO1L|DNAJA1|DNAJB1|HSPH1|DNAJB5|DDIT3|DNAJB4|SERPINH1|HSPA1B|HSPA1A
7275	1.1011e-07	2.6372e-05	141	1600	470	7935	multicellular organismal development	ATF1|ERRFI1|DGKD|WIPF3|NAB2|IRS2|ETS2|PLAU|MYC|ZC3H12A|PIM1|SOX9|PKNOX1|SCXB|JUNB|LZTS1|IL6R|SOX4|SH3GL1|MAP2K1|DAPK3|USP2|IFRD1|DYRK1A|ARID5B|ACSL3|ADAM17|TEP1|DDIT3|S100A6|KCNQ4|ALPK3|SIK1|TP53|VCL|SDC4|HIF1A|GLIS2|UGCG|S100A16|PLXNA2|AKIRIN2|EGR1|TGFB2|JUND|SMAD3|HOMER1|GADD45B|HSPA5|SMURF1|EIF2AK3|CRIM1|SYNJ2|NFKB2|COL1A1|RCAN1|NR4A3|GDNF|MAFF|STRN|CSPG4|MAFK|ANXA2P2|MXD1|BMPR1A|FGFR1|CSRNP1|…
48856	1.8558e-07	4.1027e-05	129	1439	470	7935	anatomical structure development	ATF1|ERRFI1|NAB2|IRS2|ETS2|PLAU|MYC|ZC3H12A|SOX9|PKNOX1|JUNB|LZTS1|IL6R|SOX4|IER3|SH3GL1|MAP2K1|DAPK3|USP2|IFRD1|DYRK1A|ARID5B|ACSL3|ADAM17|TEP1|DDIT3|S100A6|KCNQ4|ALPK3|TP53|VCL|SDC4|HIF1A|GLIS2|UGCG|S100A16|PLXNA2|EGR1|TGFB2|JUND|SMAD3|HOMER1|HSPA5|SMURF1|EIF2AK3|CRIM1|SYNJ2|NFKB2|SSH1|COL1A1|RCAN1|NR4A3|GDNF|STRN|CSPG4|MAFK|ANXA2P2|BMPR1A|FGFR1|CSRNP1|CDKN1A|CITED2|ADM|VLDLR|LAMC1|SHB|CYR61|SY…
48523	2.239e-07	4.5964e-05	113	1216	470	7935	negative regulation of cellular process	ATF1|ERRFI1|IRS2|CBLB|ENO1|SESN3|MYC|PEG10|PIM1|SOX9|SOX4|IER3|MAP2K1|FBXW7|ACTN1|USP2|ARID5A|ARID5B|ADAM17|TEP1|DDIT3|KCNQ4|SIK1|TP53|VCL|PSMD12|RRAD|ABHD2|GLIS2|BAG3|TP53BP2|SOCS6|SOCS7|CD276|HHATL|AKIRIN2|EGR1|PRNP|TGFB2|SMAD3|HSPA5|GADD45A|SMURF1|EIF2AK3|COL1A1|CYLD|GDNF|DLG5|AGO2|STRN|PKIG|EIF4G2|BMPR1A|FGFR1|CDKN1A|CITED2|TNFAIP3|HSPB1|ADM|THBD|HEY1|YWHAQ|ADAMTS1|ITGAV|TIMP1|JAK2|LMCD1|NKX3…
50789	2.4246e-07	4.6455e-05	288	3964	470	7935	regulation of biological process	ATF1|ERRFI1|RAPH1|HNRNPU|JMJD1C|TXNDC11|CBLB|ENO1|GABPB1|BACH1|BACH2|ABRA|NUDT4|MYC|RASSF5|PEG10|SOX9|PKNOX1|JUNB|SOX4|IER3|IL1R1|SFMBT1|STARD8|ACTN1|DAPK3|FNDC3B|SOAT1|TEP1|DDIT3|KCNQ4|SIK1|SIK2|TP53|ATF3|SLC22A5|SDC4|RRAD|HIF1A|ARPP19|TP53BP2|PPARGC1A|SRPK2|EGR1|JUND|HOMER1|GADD45B|GADD45A|PLK2|EAF1|EIF2AK3|RASSF8|ELL2|COL1A1|CYLD|EIF5|FUBP1|AGO2|STRN|PKIG|CSRNP1|CDKN1A|CITED2|PRKAG2|ADM|VLDLR|…
48519	3.0598e-07	5.4962e-05	119	1308	470	7935	negative regulation of biological process	ATF1|ERRFI1|IRS2|CBLB|ENO1|SESN3|PLAU|MYC|PEG10|PIM1|SOX9|IL6R|SOX4|IER3|MAP2K1|FBXW7|ACTN1|USP2|ARID5A|TRAFD1|ARID5B|ADAM17|TEP1|DDIT3|KCNQ4|SIK1|TP53|VCL|PSMD12|RRAD|ABHD2|GLIS2|BAG3|TP53BP2|SOCS6|SOCS7|CD276|HHATL|AKIRIN2|EGR1|PRNP|TGFB2|SMAD3|HSPA5|GADD45A|SMURF1|EIF2AK3|COL1A1|CYLD|GDNF|DLG5|AGO2|STRN|ANXA2P2|PKIG|EIF4G2|BMPR1A|FGFR1|CDKN1A|CITED2|TNFAIP3|HSPB1|ADM|THBD|HEY1|YWHAQ|ADAMTS1|IT…
65007	7.6844e-07	0.00012991	296	4142	470	7935	biological regulation	ATF1|ERRFI1|RAPH1|HNRNPU|JMJD1C|TXNDC11|CBLB|ENO1|GABPB1|BACH1|BACH2|ABRA|NUDT4|MYC|RASSF5|PEG10|SOX9|PKNOX1|JUNB|SOX4|IER3|IL1R1|SFMBT1|STARD8|ACTN1|DAPK3|FNDC3B|SOAT1|TEP1|DDIT3|KCNQ4|SIK1|SIK2|TP53|ATF3|SLC22A5|SDC4|RRAD|HIF1A|ARPP19|TP53BP2|PPARGC1A|SRPK2|EGR1|JUND|HOMER1|GADD45B|GADD45A|PLK2|EAF1|EIF2AK3|RASSF8|ELL2|COL1A1|CYLD|EIF5|FUBP1|AGO2|STRN|PKIG|CSRNP1|CDKN1A|CITED2|PRKAG2|ADM|VLDLR|…
50896	1.0414e-06	0.00016473	142	1674	470	7935	response to stimulus	ATF1|ERRFI1|DGKD|SMC5|IRS2|CBLB|PRDM2|ENO1|BACH1|ERO1L|PLAU|MYC|PIM1|JUNB|GLUL|IL6R|CD97|MAP2K1|TPM4|IL1R1|TRAFD1|ACSL3|ATG14|ADAM17|MAPKAPK3|TEP1|DDIT3|TP53|XPR1|SLC22A5|ABHD2|HIF1A|SNN|HSPH1|S100A16|SERPINH1|SOCS6|PPARGC1A|SOCS7|CD276|AKIRIN2|EGR1|PRNP|TGFB2|SMAD3|GADD45B|HSPA5|GADD45A|EIF2AK3|PYCR1|MAFA|NFKB2|SSH1|COL1A1|TMEM233|NR4A3|GDNF|CDK4|AGO2|MAFF|STRN|BMPR1A|SMG1|CDKN1A|SRXN1|CITED2|HS…
30154	1.089e-06	0.00016473	85	865	470	7935	cell differentiation	ATF1|CITED2|MAST2|WIPF3|NAB2|ADM|LAMC1|SHB|ERO1L|SYNE1|CSRP3|PEG10|ZC3H12A|TIMP1|SOX9|PKNOX1|JAK2|JUNB|LZTS1|SOX4|MYOG|EDARADD|MAP2K1|TNFRSF12A|DYNLT1|DAPK3|IFRD1|WNT9A|GLRX2|SIRT1|ADAM17|SOAT1|TEP1|S100A6|ANGPTL2|MYH9|CRYAB|TRIM54|TP53|CD44|CHST3|PPARD|CD63|SEMA3C|HIF1A|HDAC9|FSTL3|GLIS2|GNA13|S100A16|KATNA1|XIRP1|STX3|PPARGC1A|SOCS7|SH2B3|SRPK2|EGR1|TGFB2|JUND|ANGPT2|SMAD3|HOMER1|GADD45B|SORT1|…
23033	1.3878e-06	0.00018954	106	1160	470	7935	signaling pathway	DGKD|IRS2|CBLB|BACH1|ERO1L|NUDT4|IL6R|SOX4|TLE4|CD97|CAST|MAP2K1|IL1R1|DAPK3|ARID5B|ADAM17|MAPKAPK3|TEP1|DDIT3|SIK1|SIK2|TP53|XPR1|RRAD|DTX4|SDCBP|PLXNA2|SOCS6|PPARGC1A|SOCS7|SRPK2|TGFB2|SMAD3|HOMER1|GADD45B|HSPA5|HOMER2|SMURF1|EIF2AK3|MAFA|CYLD|BCL9|RCAN1|DLG5|PLEKHM1|STRN|PI4KB|BMPR1A|FGFR1|CSRNP1|GPSM2|CDKN1A|PRKAG2|ADM|DUSP16|RND3|DUSP10|HEY1|YWHAQ|ADAMTS1|ITGAV|JAK2|RBM15|RRAS2|AEN|WNT9A|FOS…
9888	1.4506e-06	0.00018954	48	398	470	7935	tissue development	ATF1|ERRFI1|CD63|SEMA3C|CITED2|ADM|LAMC1|HIF1A|PPP2CA|GNA13|CHRND|UGCG|CSRP3|S100A16|PLAU|MYC|XIRP1|SOX9|JAK2|JUNB|NKX3-1|CTSB|MYOG|EDARADD|SPEN|MAP2K1|TGFB2|SMAD3|RBM15|HOMER1|SMURF1|EIF2AK3|HNRNPAB|TBX3|VEGFA|COL1A1|RCAN1|ALDH1A3|NR4A3|ACTC1|GDNF|TEP1|VGLL2|CD44|VCL|PPARD|BMPR1A|FGFR1
48869	1.4509e-06	0.00018954	87	898	470	7935	cellular developmental process	ATF1|CITED2|MAST2|WIPF3|NAB2|ADM|LAMC1|SHB|ERO1L|SYNE1|CSRP3|PEG10|ZC3H12A|TIMP1|SOX9|PKNOX1|JAK2|JUNB|LZTS1|SOX4|MYOG|EDARADD|MAP2K1|TNFRSF12A|DYNLT1|DAPK3|IFRD1|WNT9A|GLRX2|SIRT1|ADAM17|SOAT1|TEP1|S100A6|ANGPTL2|MYH9|CRYAB|TRIM54|TP53|CD44|CHST3|PPARD|CD63|SEMA3C|HIF1A|HDAC9|FSTL3|GLIS2|GNA13|S100A16|KATNA1|XIRP1|STX3|PCNT|PPARGC1A|SOCS7|SH2B3|SRPK2|EGR1|TGFB2|JUND|ANGPT2|SMAD3|HOMER1|GADD45B|S…
32501	1.6409e-06	0.00020505	161	1973	470	7935	multicellular organismal process	ATF1|ERRFI1|DGKD|WIPF3|NAB2|IRS2|ETS2|FAM134B|PLAU|MYC|ZC3H12A|PIM1|SOX9|PKNOX1|SCXB|JUNB|LZTS1|IL6R|SOX4|SH3GL1|MAP2K1|TPM4|IL1R1|DAPK3|USP2|IFRD1|DYRK1A|ARID5B|ACSL3|ADAM17|TEP1|DDIT3|S100A6|KCNQ4|ALPK3|SIK1|TP53|VCL|SDC4|HIF1A|GLIS2|UGCG|SDCBP|S100A16|SERPINH1|PLXNA2|PPARGC1A|AKIRIN2|EGR1|TGFB2|JUND|SMAD3|HOMER1|GADD45B|HSPA5|SMURF1|EIF2AK3|CRIM1|SYNJ2|NFKB2|COL1A1|RCAN1|DIAPH1|NR4A3|GDNF|MAFF…
1944	2.7172e-06	0.00032539	30	203	470	7935	vasculature development	ERRFI1|SEMA3C|CITED2|SHB|CYR61|GNA13|CSRP3|PLAU|ZC3H12A|ITGAV|PKNOX1|JUNB|SPEN|MAP2K1|TGFB2|RBM15|ANXA2|TNFRSF12A|TBX3|VEGFA|COL1A1|KLF5|TEP1|MYH9|CSPG4|ANXA2P2|ITGA5|NAA15|CD44|FGFR1
48518	3.0118e-06	0.00034624	120	1380	470	7935	positive regulation of biological process	ATF1|IRS2|CBLB|GABPB1|PVR|ABRA|ETS2|MYC|PIM1|SOX9|PKNOX1|JUNB|IL6R|SOX4|MAP2K3|MAP2K1|DAPK3|USP2|FNDC3B|ADAM17|SOAT1|TEP1|DDIT3|S100A6|TP53|ATF3|PSMD12|SLC22A5|SDC4|NOP2|HIF1A|ARPP19|GLIS2|TP53BP2|PPARGC1A|CD276|AKIRIN2|EGR1|TGFB2|JUND|SMAD3|HOMER1|HSPA5|SMURF1|PLK2|EIF2AK3|MAFA|NR4A1|NR4A3|GDNF|CDK4|MAP3K14|BMPR1A|FGFR1|CSRNP1|CDKN1A|CITED2|PRKAG2|ADM|LAMC1|CYR61|PANX1|THBD|TIMP1|JAK2|LMCD1|BOK|…
7165	4.0235e-06	0.00044475	95	1031	470	7935	signal transduction	ATF1|GPSM2|CDKN1A|DGKD|FAM13B|RAPH1|PRKAG2|ADM|IRS2|CBLB|VLDLR|SHB|BACH1|DUSP16|RND3|NUDT4|DUSP10|YWHAQ|PLAU|RASSF5|ANKRD1|MAP3K8|JAK2|IL6R|PRKG1|SH3GL1|EDARADD|MAP2K3|MAP2K1|HSP90AA1|TRIM63|IL1R1|STARD8|PDE4D|DAPK3|RRAS2|PPP2R5A|WNT9A|FOS|DUSP8|TNFRSF1A|MRAS|LATS2|MAPKAPK3|CDC42EP3|RARA|S100A6|RAPGEF2|ANGPTL2|SIK1|SIK2|CRYAB|TRIM54|TP53|TRIM55|HBEGF|RRAD|ARHGAP17|HIF1A|CORO1C|RAB21|PPP2CA|GNA13|…
1568	4.7913e-06	0.00047994	29	198	470	7935	blood vessel development	SEMA3C|CITED2|SHB|CYR61|GNA13|CSRP3|PLAU|ZC3H12A|ITGAV|PKNOX1|JUNB|SPEN|MAP2K1|TGFB2|RBM15|ANXA2|TNFRSF12A|TBX3|VEGFA|COL1A1|KLF5|TEP1|MYH9|CSPG4|ANXA2P2|ITGA5|NAA15|CD44|FGFR1
23046	4.8428e-06	0.00047994	102	1134	470	7935	signaling process	ATF1|DGKD|FAM13B|NAB2|RAPH1|IRS2|CBLB|BACH1|NUDT4|PLAU|RASSF5|MAP3K8|IL6R|SH3GL1|MAP2K3|MAP2K1|IL1R1|STARD8|DAPK3|MAPKAPK3|S100A6|SIK1|SIK2|TP53|RRAD|ARHGAP17|HIF1A|CORO1C|SDCBP|PLXNA2|TP53BP2|SOCS6|SRPK2|HOMER1|GADD45B|EIF2AK3|RASSF8|MAFA|NFKB2|RCAN1|NR4A1|GDNF|CDK4|DLG5|PI4KB|PKIG|FGFR1|GPSM2|CDKN1A|KCNC4|PRKAG2|ADM|VLDLR|SHB|DUSP16|RND3|DUSP10|YWHAQ|ANKRD1|JAK2|PRKG1|EDARADD|HSP90AA1|TRIM63|PD…
23060	4.8428e-06	0.00047994	102	1134	470	7935	signal transmission	ATF1|DGKD|FAM13B|NAB2|RAPH1|IRS2|CBLB|BACH1|NUDT4|PLAU|RASSF5|MAP3K8|IL6R|SH3GL1|MAP2K3|MAP2K1|IL1R1|STARD8|DAPK3|MAPKAPK3|S100A6|SIK1|SIK2|TP53|RRAD|ARHGAP17|HIF1A|CORO1C|SDCBP|PLXNA2|TP53BP2|SOCS6|SRPK2|HOMER1|GADD45B|EIF2AK3|RASSF8|MAFA|NFKB2|RCAN1|NR4A1|GDNF|CDK4|DLG5|PI4KB|PKIG|FGFR1|GPSM2|CDKN1A|KCNC4|PRKAG2|ADM|VLDLR|SHB|DUSP16|RND3|DUSP10|YWHAQ|ANKRD1|JAK2|PRKG1|EDARADD|HSP90AA1|TRIM63|PD…
48522	6.8043e-06	0.00065185	112	1286	470	7935	positive regulation of cellular process	ATF1|IRS2|GABPB1|ABRA|ETS2|MYC|PIM1|SOX9|PKNOX1|JUNB|IL6R|SOX4|MAP2K3|MAP2K1|DAPK3|USP2|FNDC3B|ADAM17|SOAT1|TEP1|DDIT3|S100A6|TP53|ATF3|PSMD12|SDC4|NOP2|HIF1A|ARPP19|GLIS2|TP53BP2|PPARGC1A|CD276|AKIRIN2|EGR1|TGFB2|JUND|SMAD3|HSPA5|SMURF1|PLK2|EIF2AK3|MAFA|NR4A1|NR4A3|GDNF|CDK4|MAP3K14|BMPR1A|FGFR1|CSRNP1|CDKN1A|CITED2|PRKAG2|ADM|LAMC1|CYR61|PANX1|TIMP1|JAK2|LMCD1|BOK|MYOG|HSP90AA1|RBM15|ANXA2|TNF…
1525	1.1387e-05	0.0010557	20	115	470	7935	angiogenesis	SPEN|TGFB2|RBM15|ANXA2|TNFRSF12A|SHB|CYR61|VEGFA|GNA13|KLF5|TEP1|PLAU|ZC3H12A|MYH9|CSPG4|ANXA2P2|ITGA5|NAA15|PKNOX1|FGFR1
51270	1.3313e-05	0.0011957	25	166	470	7935	regulation of cellular component movement	CD63|CITED2|ABHD2|NEXN|IRS2|HIF1A|HDAC9|GNA13|PLAU|JAK2|IL6R|SPAG9|MAP2K1|TGFB2|ANGPT2|SMAD3|ACTN1|RRAS2|VEGFA|ADAM17|TEP1|BCAR1|VCL|CHST3|HBEGF
30334	1.396e-05	0.0012158	23	146	470	7935	regulation of cell migration	SPAG9|CD63|MAP2K1|TGFB2|ANGPT2|SMAD3|CITED2|ABHD2|RRAS2|NEXN|IRS2|HIF1A|HDAC9|VEGFA|GNA13|ADAM17|TEP1|PLAU|JAK2|IL6R|BCAR1|VCL|HBEGF
42127	1.6251e-05	0.0013737	53	497	470	7935	regulation of cell proliferation	CDKN1A|ADM|IRS2|CBLB|LAMC1|ADAMTS1|PLAU|MYC|TIMP1|SOX9|JAK2|IL6R|SOX4|NKX3-1|MAP2K1|WNT9A|OSMR|SIRT1|GNL3|ADAM17|TEP1|PPAP2A|RARA|S100A6|TP53|ATF3|PPARD|ODC1|NOP2|PPM1D|HIF1A|SERTAD1|XIRP1|E2F3|IL12RB2|CD276|AKIRIN2|EGLN3|TGFB2|SMAD3|TBX3|VEGFA|FABP3|KLF5|CDK4|DLG5|ABI1|PMP22|STRN|HSPA1B|HSPA1A|BMPR1A|FGFR1
9891	1.8192e-05	0.0014938	50	461	470	7935	positive regulation of biosynthetic process	ATF1|CSRNP1|CITED2|IRS2|GABPB1|ABRA|ETS2|MYC|SOX9|PKNOX1|JAK2|JUNB|SOX4|MYOG|MAP2K3|HSP90AA1|RBM15|FOS|TNFRSF1A|SOAT1|DDIT3|RARA|VGLL2|TP53|FAM129A|HIF1A|ARPP19|FSTL3|GLIS2|ARNTL|E2F3|PPARGC1A|CD276|SPEN|ZNF462|AKIRIN2|EGR1|TGFB2|SMAD3|SAMD4A|MAFA|HNRNPAB|TBX3|VEGFA|NR4A1|KLF6|KLF5|NR4A3|GDNF|NAA15
6950	2.0716e-05	0.0016538	90	1001	470	7935	response to stress	ERRFI1|SMG1|CDKN1A|SRXN1|CITED2|HSPB8|HSPB7|HSPB1|SMC5|ADM|VLDLR|BACH1|ERO1L|THBD|DUSP10|PLAU|PIM1|ANKRD1|JAK2|IL6R|CTSB|CD97|MAP2K1|HSP90AA1|TPM4|GPX3|IL1R1|AEN|FOS|GLRX2|ATG14|SIRT1|ETV5|TNFRSF1A|ADAM17|MAPKAPK3|DDIT3|CRY1|CHST1|ANGPTL2|ITGA5|SGK1|CRYAB|TP53|CHST2|CD44|CHST3|PPARD|PPP1R15A|ITIH4|ABHD2|FAM129A|TFPI|HIF1A|HDAC9|GNA13|DNAJB1|PPP2CB|SNN|HSPH1|DNAJB5|DNAJB4|SERPINH1|UBQLN1|STX3|SOCS…
6928	2.4149e-05	0.0018758	33	260	470	7935	cellular component movement	ATF1|SEMA3C|HSPB1|LAMC1|ATP1A1|PVR|GNA13|SDCBP|KATNA1|PLXNA2|SPOCK1|JAK2|IL6R|CD97|MAP2K1|TGFB2|TPM4|TNFRSF12A|ARID5B|MSN|VEGFA|DNAJA1|ADAM17|GDNF|TEP1|ABI1|PPAP2A|MYH9|ITGA5|BCAR1|CD44|VCL|PPARD
31328	2.8388e-05	0.0021205	49	456	470	7935	positive regulation of cellular biosynthetic process	ATF1|CSRNP1|CITED2|IRS2|GABPB1|ABRA|ETS2|MYC|SOX9|PKNOX1|JAK2|JUNB|SOX4|MYOG|MAP2K3|HSP90AA1|RBM15|FOS|TNFRSF1A|SOAT1|DDIT3|RARA|VGLL2|TP53|FAM129A|HIF1A|ARPP19|FSTL3|GLIS2|ARNTL|E2F3|PPARGC1A|CD276|SPEN|ZNF462|AKIRIN2|EGR1|SMAD3|SAMD4A|MAFA|HNRNPAB|TBX3|VEGFA|NR4A1|KLF6|KLF5|NR4A3|GDNF|NAA15
51239	2.8775e-05	0.0021205	56	546	470	7935	regulation of multicellular organismal process	ATF1|ERRFI1|MAST2|NAB2|HSPB7|ADM|PANX1|THBD|CSRP3|PLAU|MYC|SOX9|JAK2|LZTS1|LMCD1|IL6R|NKX3-1|MAP2K1|RBM15|ANXA2|TNFRSF12A|DYNLT1|WNT9A|TNFRSF1A|ADAM17|TEP1|RARA|ANGPTL2|KCNQ4|TP53|HBEGF|CD63|SLC22A5|SDC4|ATP1A1|HIF1A|HDAC9|FSTL3|KATNA1|CD276|SPEN|AKIRIN2|EGR1|TGFB2|JUND|ANGPT2|SMAD3|SMURF1|EIF2AK3|TBX3|VEGFA|GDNF|MAFF|ANXA2P2|BMPR1A|FGFR1
9653	3.3025e-05	0.0023728	68	708	470	7935	anatomical structure morphogenesis	ATF1|ERRFI1|CSRNP1|CDKN1A|CITED2|NAB2|ADM|LAMC1|SHB|CYR61|CSRP3|HEY1|ADAMTS1|PLAU|MYC|ZC3H12A|SOX9|PKNOX1|JAK2|JUNB|IER3|NKX3-1|EDARADD|MAP2K1|RBM15|ANXA2|TNFRSF12A|ARID5B|WNT9A|UGDH|ALDH1A3|TEP1|S100A6|KCNQ4|MYH9|ITGA5|CRYAB|TP53|CD44|VCL|CHST3|SEMA3C|HIF1A|GNA13|ABLIM1|PLXNA2|XIRP1|PCNT|SPEN|TGFB2|ANGPT2|SMAD3|HSPA5|HNRNPAB|TBX3|VEGFA|SSH1|COL1A1|KLF5|NR4A3|ACTC1|GDNF|PMP22|CSPG4|ANXA2P2|NAA15|…
48514	3.5616e-05	0.0024966	24	165	470	7935	blood vessel morphogenesis	SPEN|TGFB2|RBM15|ANXA2|SEMA3C|TNFRSF12A|CITED2|SHB|CYR61|VEGFA|GNA13|CSRP3|KLF5|TEP1|PLAU|ZC3H12A|MYH9|CSPG4|ANXA2P2|ITGA5|NAA15|PKNOX1|JUNB|FGFR1
9266	3.7125e-05	0.0025404	13	60	470	7935	response to temperature stimulus	HSPA1L|HSPB8|HSPB7|HSPB1|ADM|FOS|GLRX2|ERO1L|VEGFA|DNAJA1|DNAJA4|DNAJB4|CRYAB
51240	4.5264e-05	0.0029907	20	126	470	7935	positive regulation of multicellular organismal process	ATF1|AKIRIN2|TGFB2|SLC22A5|SMAD3|ADM|ATP1A1|HIF1A|VEGFA|PANX1|THBD|ADAM17|GDNF|MYC|RARA|JAK2|IL6R|CD276|BMPR1A|FGFR1
10557	4.5786e-05	0.0029907	47	439	470	7935	positive regulation of macromolecule biosynthetic process	ATF1|CSRNP1|CITED2|FAM129A|IRS2|GABPB1|HIF1A|ABRA|ETS2|FSTL3|GLIS2|ARNTL|MYC|E2F3|SOX9|PKNOX1|JUNB|PPARGC1A|SOX4|CD276|MYOG|MAP2K3|SPEN|ZNF462|AKIRIN2|EGR1|TGFB2|SMAD3|RBM15|SAMD4A|FOS|MAFA|HNRNPAB|TBX3|TNFRSF1A|VEGFA|NR4A1|KLF6|KLF5|NR4A3|SOAT1|GDNF|DDIT3|RARA|NAA15|VGLL2|TP53
51674	4.9206e-05	0.0030743	25	179	470	7935	localization of cell	ATF1|SEMA3C|LAMC1|ATP1A1|PVR|SDCBP|KATNA1|PLXNA2|IL6R|MAP2K1|TGFB2|TNFRSF12A|ARID5B|MSN|VEGFA|DNAJA1|ADAM17|GDNF|TEP1|PPAP2A|MYH9|ITGA5|BCAR1|CD44|PPARD
48870	4.9206e-05	0.0030743	25	179	470	7935	cell motility	ATF1|SEMA3C|LAMC1|ATP1A1|PVR|SDCBP|KATNA1|PLXNA2|IL6R|MAP2K1|TGFB2|TNFRSF12A|ARID5B|MSN|VEGFA|DNAJA1|ADAM17|GDNF|TEP1|PPAP2A|MYH9|ITGA5|BCAR1|CD44|PPARD
40012	5.1052e-05	0.0031218	23	158	470	7935	regulation of locomotion	SPAG9|CD63|MAP2K1|TGFB2|ANGPT2|SMAD3|CITED2|ABHD2|RRAS2|NEXN|IRS2|HIF1A|HDAC9|VEGFA|GNA13|ADAM17|TEP1|PLAU|JAK2|IL6R|BCAR1|VCL|HBEGF
40011	5.8254e-05	0.003488	28	214	470	7935	locomotion	ATF1|SEMA3C|LAMC1|ATP1A1|PVR|CYR61|SDCBP|PLAU|KATNA1|PLXNA2|IL6R|MAP2K1|TGFB2|TNFRSF12A|ARID5B|MSN|VEGFA|DNAJA1|ADAM17|GDNF|TEP1|NEDD4|PPAP2A|MYH9|ITGA5|BCAR1|CD44|PPARD
50793	7.5912e-05	0.0044525	47	448	470	7935	regulation of developmental process	ATF1|ERRFI1|NAB2|HIF1A|HDAC9|FSTL3|PPP2CA|GNA13|MYC|KATNA1|ITGAV|SOX9|JAK2|JUNB|LZTS1|IL6R|CD276|NKX3-1|SPEN|MAP2K1|TGFB2|JUND|ANGPT2|SMAD3|RBM15|TNFRSF12A|DYNLT1|SMURF1|FNDC3B|EIF2AK3|WNT9A|SIRT1|TBX3|TNFRSF1A|VEGFA|GDNF|TEP1|CDC42EP3|MAFF|RARA|ANGPTL2|MYH9|SIK1|TP53|PPARD|BMPR1A|FGFR1
51254	9.0184e-05	0.0051837	38	338	470	7935	positive regulation of RNA metabolic process	ATF1|CSRNP1|CITED2|GABPB1|HIF1A|ABRA|ETS2|FSTL3|ARNTL|E2F3|SOX9|PKNOX1|JUNB|PPARGC1A|SOX4|MYOG|MAP2K3|SPEN|ZNF462|AKIRIN2|EGR1|MAP2K1|SMAD3|RBM15|FOS|MAFA|HNRNPAB|TBX3|TNFRSF1A|VEGFA|NR4A1|KLF6|NR4A3|GDNF|RARA|NAA15|VGLL2|TP53
7166	9.4333e-05	0.0053159	57	583	470	7935	cell surface receptor linked signaling pathway	CSRNP1|GPSM2|DGKD|IRS2|CBLB|HEY1|ADAMTS1|ITGAV|JAK2|IL6R|SOX4|TLE4|CD97|CAST|RBM15|IL1R1|ARID5B|WNT9A|FOS|TNFRSF1B|OSMR|TNFRSF1A|ADAM17|TEP1|PPAP2A|MYH9|ITGA5|XPR1|HBEGF|DTX4|GNA13|PLXNA2|NCAM1|SOCS7|IL12RB2|SPEN|TGFB2|ANGPT2|SMAD3|HOMER1|HOMER2|CSNK1A1|SORT1|SMURF1|EIF2AK3|MAFA|VEGFA|CYLD|HEYL|BCL9|KLF6|ABI1|STRN|BCAR1|CSNK1A1L|BMPR1A|FGFR1
70887	9.7328e-05	0.0053792	31	255	470	7935	cellular response to chemical stimulus	PPP1R15A|IRS2|VLDLR|HIF1A|HDAC9|ERO1L|PIM1|STX3|JAK2|JUNB|SOCS7|IL6R|EGR1|TGFB2|SMAD3|HSPA5|GPX3|AKR1C1|EIF2AK3|PYCR1|WNT9A|FOS|ETV5|VEGFA|SSH1|COL1A1|LATS2|DDIT3|AGO2|RARA|BCAR1
32101	0.00011921	0.0064641	15	85	470	7935	regulation of response to external stimulus	ANGPT2|SMAD3|ANXA2|TNFRSF1B|OSMR|TNFRSF1A|VEGFA|THBD|ADAM17|NPC1|PLAU|ANXA2P2|JAK2|IL6R|CD276
45893	0.00014254	0.0075862	37	333	470	7935	positive regulation of transcription, DNA-dependent	ATF1|CSRNP1|CITED2|GABPB1|HIF1A|ABRA|ETS2|FSTL3|ARNTL|E2F3|SOX9|PKNOX1|JUNB|PPARGC1A|SOX4|MYOG|MAP2K3|SPEN|ZNF462|AKIRIN2|EGR1|SMAD3|RBM15|FOS|MAFA|HNRNPAB|TBX3|TNFRSF1A|VEGFA|NR4A1|KLF6|NR4A3|GDNF|RARA|NAA15|VGLL2|TP53
8284	0.0001711	0.0087812	30	251	470	7935	positive regulation of cell proliferation	CDKN1A|ODC1|NOP2|ADM|IRS2|LAMC1|HIF1A|SERTAD1|MYC|E2F3|TIMP1|JAK2|IL6R|SOX4|IL12RB2|CD276|AKIRIN2|TGFB2|OSMR|TBX3|VEGFA|ADAM17|KLF5|CDK4|RARA|S100A6|ATF3|PPARD|BMPR1A|FGFR1
45944	0.0001711	0.0087812	30	251	470	7935	positive regulation of transcription from RNA polymerase II promoter	ATF1|CSRNP1|CITED2|GABPB1|HIF1A|ABRA|FSTL3|ARNTL|SOX9|PKNOX1|JUNB|PPARGC1A|MYOG|SPEN|ZNF462|AKIRIN2|EGR1|SMAD3|RBM15|FOS|MAFA|TNFRSF1A|VEGFA|NR4A1|KLF6|NR4A3|GDNF|RARA|VGLL2|TP53
45941	0.0001791	0.0090306	41	387	470	7935	positive regulation of transcription	ATF1|CSRNP1|CITED2|GABPB1|HIF1A|ABRA|ETS2|FSTL3|GLIS2|ARNTL|MYC|E2F3|SOX9|PKNOX1|JUNB|PPARGC1A|SOX4|MYOG|MAP2K3|SPEN|ZNF462|AKIRIN2|EGR1|SMAD3|RBM15|FOS|MAFA|HNRNPAB|TBX3|TNFRSF1A|VEGFA|NR4A1|KLF6|KLF5|NR4A3|GDNF|DDIT3|RARA|NAA15|VGLL2|TP53
51272	0.00020326	0.010062	15	89	470	7935	positive regulation of cellular component movement	SPAG9|MAP2K1|TGFB2|SMAD3|RRAS2|IRS2|HIF1A|HDAC9|VEGFA|ADAM17|JAK2|IL6R|BCAR1|CHST3|HBEGF
42730	0.00020656	0.010062	3	3	470	7935	fibrinolysis	ANXA2|PLAU|ANXA2P2
10604	0.00024498	0.011627	60	645	470	7935	positive regulation of macromolecule metabolic process	ATF1|CSRNP1|CITED2|PRKAG2|IRS2|CBLB|GABPB1|ABRA|ETS2|MYC|SOX9|PKNOX1|JAK2|JUNB|IL6R|SOX4|MYOG|MAP2K3|MAP2K1|RBM15|FOS|TNFRSF1A|ADAM17|SOAT1|DDIT3|RARA|ITGA5|VGLL2|TP53|CD44|PSMD12|FAM129A|HIF1A|FSTL3|GLIS2|ARNTL|E2F3|PPARGC1A|CD276|SPEN|ZNF462|AKIRIN2|EGR1|TGFB2|SMAD3|HSPA5|SMURF1|SAMD4A|MAFA|HNRNPAB|TBX3|VEGFA|NR4A1|KLF6|KLF5|NR4A3|GDNF|NEDD4|NAA15|BMPR1A
45595	0.00024928	0.011627	34	305	470	7935	regulation of cell differentiation	ATF1|ERRFI1|HIF1A|HDAC9|FSTL3|PPP2CA|KATNA1|ITGAV|SOX9|JAK2|JUNB|LZTS1|IL6R|CD276|SPEN|MAP2K1|TGFB2|JUND|SMAD3|RBM15|TNFRSF12A|DYNLT1|FNDC3B|WNT9A|SIRT1|TBX3|TEP1|MAFF|RARA|SIK1|TP53|PPARD|BMPR1A|FGFR1
30335	0.00025082	0.011627	14	81	470	7935	positive regulation of cell migration	SPAG9|MAP2K1|TGFB2|SMAD3|RRAS2|IRS2|HIF1A|HDAC9|VEGFA|ADAM17|JAK2|IL6R|BCAR1|HBEGF
10628	0.0002632	0.012007	41	394	470	7935	positive regulation of gene expression	ATF1|CSRNP1|CITED2|GABPB1|HIF1A|ABRA|ETS2|FSTL3|GLIS2|ARNTL|MYC|E2F3|SOX9|PKNOX1|JUNB|PPARGC1A|SOX4|MYOG|MAP2K3|SPEN|ZNF462|AKIRIN2|EGR1|SMAD3|RBM15|FOS|MAFA|HNRNPAB|TBX3|TNFRSF1A|VEGFA|NR4A1|KLF6|KLF5|NR4A3|GDNF|DDIT3|RARA|NAA15|VGLL2|TP53
61138	0.00027082	0.012161	12	63	470	7935	morphogenesis of a branching epithelium	GNA13|SPEN|RBM15|SEMA3C|MYC|ADM|SOX9|TBX3|CD44|NKX3-1|VEGFA|FGFR1
10646	0.00029679	0.013123	63	691	470	7935	regulation of cell communication	ATF1|ERRFI1|CITED2|TNFAIP3|IRS2|CBLB|DUSP16|ABRA|PLAU|RASGEF1B|PEG10|JAK2|LZTS1|LMCD1|MCF2L2|IL6R|SOX4|NKX3-1|MAP2K1|RALGAPA1|GLRX2|DUSP8|SIRT1|TNFRSF1A|ADAM17|LATS2|NPC1|TEP1|RAPGEF2|KCNQ4|ITGA5|TP53|CD44|HBEGF|PPARD|AGPAT9|SLC20A1|HIF1A|SLC7A1|FSTL3|PPP2CA|PPP2CB|RICTOR|NCAM1|SOCS6|SOCS7|PTPN1|EGR1|TGFB2|SMAD3|HSPA5|SMURF1|PLK2|EIF2AK3|VEGFA|CYLD|DNMBP|GDNF|NEDD4|TRIM38|MAP3K14|BMPR1A|FGFR1
48729	0.00031831	0.013588	23	178	470	7935	tissue morphogenesis	ATF1|SPEN|ERRFI1|TGFB2|SMAD3|RBM15|SEMA3C|ADM|TBX3|VEGFA|COL1A1|GNA13|ALDH1A3|NR4A3|ACTC1|GDNF|MYC|SOX9|CD44|VCL|NKX3-1|BMPR1A|FGFR1
9893	0.00031942	0.013588	62	679	470	7935	positive regulation of metabolic process	ATF1|CSRNP1|CITED2|PRKAG2|IRS2|CBLB|GABPB1|ABRA|ETS2|MYC|SOX9|PKNOX1|JAK2|JUNB|IL6R|SOX4|MYOG|MAP2K3|MAP2K1|HSP90AA1|RBM15|FOS|TNFRSF1A|ADAM17|SOAT1|DDIT3|RARA|ITGA5|VGLL2|TP53|CD44|PSMD12|FAM129A|HIF1A|ARPP19|FSTL3|GLIS2|ARNTL|E2F3|PPARGC1A|CD276|SPEN|ZNF462|AKIRIN2|EGR1|TGFB2|SMAD3|HSPA5|SMURF1|SAMD4A|MAFA|HNRNPAB|TBX3|VEGFA|NR4A1|KLF6|KLF5|NR4A3|GDNF|NEDD4|NAA15|BMPR1A
61061	0.0003215	0.013588	25	201	470	7935	muscle structure development	SEMA3C|SYNE1|CHRND|CSRP3|XIRP1|ANKRD2|CTSB|MYOG|TGFB2|HOMER1|SORT1|USP2|IFRD1|ARID5B|SIRT1|TBX3|VEGFA|RCAN1|MRAS|ACTC1|TEP1|MYH9|VGLL2|CRYAB|HBEGF
48732	0.00033263	0.013855	16	103	470	7935	gland development	TGFB2|SMAD3|SEMA3C|CITED2|EIF2AK3|IRS2|TBX3|APLN|VEGFA|ALDH1A3|TEP1|SOX9|CD44|NKX3-1|BMPR1A|FGFR1
16477	0.0003538	0.014526	22	168	470	7935	cell migration	ATF1|TGFB2|SEMA3C|TNFRSF12A|ARID5B|MSN|LAMC1|PVR|VEGFA|SDCBP|ADAM17|GDNF|TEP1|KATNA1|PPAP2A|PLXNA2|MYH9|ITGA5|IL6R|BCAR1|CD44|PPARD
90183	0.0003685	0.014917	4	7	470	7935	regulation of kidney development	ATF1|GDNF|MYC|VEGFA
60674	0.00039912	0.015931	5	12	470	7935	placenta blood vessel development	SPEN|MAP2K1|RBM15|JUNB|CYR61
6357	0.00042395	0.016691	50	522	470	7935	regulation of transcription from RNA polymerase II promoter	ATF1|CSRNP1|CITED2|ENO1|GABPB1|CHD2|BACH1|ABRA|HEY1|MYC|ANKRD1|SOX9|PKNOX1|JUNB|LMCD1|MYOG|MAP2K1|RBM15|USP2|FOS|SIRT1|TNFRSF1A|RARA|SIK1|VGLL2|TP53|PPARD|HIF1A|HDAC9|FSTL3|ARNTL|DNAJB5|PPARGC1A|SPEN|ZNF462|AKIRIN2|EGR1|JUND|SMAD3|EAF1|MAFA|TBX3|VEGFA|NR4A1|KLF6|RYBP|NR4A3|GDNF|NEDD4|PKIG
51241	0.0004756	0.018225	14	86	470	7935	negative regulation of multicellular organismal process	ANXA2|EIF2AK3|ADM|ATP1A1|VEGFA|THBD|ADAM17|PLAU|RARA|KCNQ4|ANXA2P2|SOX9|JAK2|IL6R
40017	0.0004756	0.018225	14	86	470	7935	positive regulation of locomotion	SPAG9|MAP2K1|TGFB2|SMAD3|RRAS2|IRS2|HIF1A|HDAC9|VEGFA|ADAM17|JAK2|IL6R|BCAR1|HBEGF
51346	0.00053125	0.019914	8	33	470	7935	negative regulation of hydrolase activity	NR4A1|TGFB2|HSPA5|SORT1|ANGPTL2|SIRT1|CRYAB|TP53
51173	0.00053352	0.019914	44	447	470	7935	positive regulation of nitrogen compound metabolic process	ATF1|CSRNP1|CITED2|GABPB1|HIF1A|ABRA|ETS2|FSTL3|GLIS2|ARNTL|MYC|E2F3|SOX9|PKNOX1|JAK2|JUNB|PPARGC1A|SOX4|MYOG|MAP2K3|SPEN|ZNF462|AKIRIN2|EGR1|MAP2K1|HSP90AA1|SMAD3|RBM15|FOS|MAFA|HNRNPAB|TBX3|TNFRSF1A|VEGFA|NR4A1|KLF6|KLF5|NR4A3|GDNF|DDIT3|RARA|NAA15|VGLL2|TP53
9628	0.00054968	0.020253	27	232	470	7935	response to abiotic stimulus	CDKN1A|HSPB8|HSPB7|HSPB1|ADM|PPM1D|ERO1L|THBD|SNN|MAT2A|DNAJB4|JUNB|IL6R|CTSB|ANGPT2|HSPA1L|AEN|FOS|GLRX2|USP28|VEGFA|COL1A1|DNAJA1|DNAJA4|NEDD4|CRYAB|TP53
48762	0.00065931	0.023985	8	34	470	7935	mesenchymal cell differentiation	ATF1|TGFB2|SEMA3C|GDNF|SOX9|HIF1A|HNRNPAB|FGFR1
31325	0.00068932	0.024677	59	657	470	7935	positive regulation of cellular metabolic process	ATF1|CSRNP1|CITED2|PRKAG2|IRS2|GABPB1|ABRA|ETS2|MYC|SOX9|PKNOX1|JAK2|JUNB|IL6R|SOX4|MYOG|MAP2K3|MAP2K1|HSP90AA1|RBM15|FOS|TNFRSF1A|ADAM17|SOAT1|DDIT3|RARA|ITGA5|VGLL2|TP53|CD44|PSMD12|FAM129A|HIF1A|ARPP19|FSTL3|GLIS2|ARNTL|E2F3|PPARGC1A|CD276|SPEN|ZNF462|AKIRIN2|EGR1|SMAD3|HSPA5|SMURF1|SAMD4A|MAFA|HNRNPAB|TBX3|VEGFA|NR4A1|KLF6|KLF5|NR4A3|GDNF|NAA15|BMPR1A
51094	0.0006985	0.024677	23	188	470	7935	positive regulation of developmental process	ATF1|MAP2K1|TGFB2|JUND|ANGPT2|SMAD3|TNFRSF12A|FNDC3B|HIF1A|HDAC9|TNFRSF1A|VEGFA|GDNF|MYC|RARA|ANGPTL2|JAK2|JUNB|IL6R|PPARD|CD276|BMPR1A|FGFR1
51726	0.00070409	0.024677	33	310	470	7935	regulation of cell cycle	PPP1R15A|CDKN1A|CITED2|BACH1|SESN3|SERTAD1|MYC|PIM1|TP53BP2|JUNB|EIF4E|PRNP|MAP2K1|TGFB2|SMAD3|GADD45B|FBXW7|GADD45A|DYNLT3|USP2|WNT9A|USP28|TBX3|CYLD|ADAM17|LATS2|TEP1|CDK4|DDIT3|RARA|SIK1|TP53|EIF4G2
32879	0.00076754	0.025643	41	415	470	7935	regulation of localization	ATF1|CD63|CITED2|ABHD2|PRKAG2|NEXN|IRS2|HIF1A|ARPP19|HDAC9|NUDT4|PANX1|GNA13|PLAU|ITGAV|JAK2|IL6R|SPAG9|MAP2K1|TGFB2|ANGPT2|SMAD3|HOMER1|ANXA2|ACTN1|RRAS2|SIRT1|VEGFA|KIAA0226|CYLD|ADAM17|GDNF|TEP1|NEDD4|PKIG|CRYAB|BCAR1|VCL|CHST3|HBEGF|BMPR1A
70482	0.00078005	0.025643	16	111	470	7935	response to oxygen levels	CDKN1A|EGLN3|TGFB2|ANGPT2|SMAD3|CITED2|ADM|VLDLR|HIF1A|VEGFA|ADAM17|PLAU|PIM1|UBQLN1|ANGPTL2|CRYAB
7565	0.00078754	0.025643	11	61	470	7935	female pregnancy	THBD|ANGPT2|GPX3|CITED2|PLAU|LNPEP|ADM|FOS|JUNB|PPARD|BYSL
32909	0.00078974	0.025643	3	4	470	7935	regulation of transforming growth factor-beta2 production	TGFB2|SMAD3|HIF1A
46697	0.00078974	0.025643	3	4	470	7935	decidualization	CITED2|JUNB|PPARD
30199	0.00079409	0.025643	6	20	470	7935	collagen fibril organization	COL1A1|TGFB2|ANXA2|P4HA1|SERPINH1|ANXA2P2
48008	0.00079409	0.025643	6	20	470	7935	platelet-derived growth factor receptor signaling pathway	CSRNP1|TEP1|ARID5B|JAK2|BCAR1|VEGFA
7517	0.00089105	0.028454	21	168	470	7935	muscle organ development	MYOG|TGFB2|HOMER1|SEMA3C|USP2|ARID5B|SIRT1|TBX3|VEGFA|CHRND|RCAN1|CSRP3|MRAS|ACTC1|TEP1|XIRP1|ANKRD2|VGLL2|CRYAB|HBEGF|CTSB
2053	0.00091369	0.028856	5	14	470	7935	positive regulation of mesenchymal cell proliferation	MYC|IRS2|VEGFA|BMPR1A|FGFR1
9611	0.00092981	0.029046	27	240	470	7935	response to wounding	ITIH4|ABHD2|ADM|TFPI|HIF1A|HDAC9|GNA13|THBD|PLAU|JAK2|IL6R|CTSB|CD97|MAP2K1|TGFB2|SMAD3|FOS|MAFA|TNFRSF1A|KLF6|ADAM17|CHST1|ITGA5|CHST2|CD44|CHST3|PPARD
14706	0.00095309	0.029453	14	92	470	7935	striated muscle tissue development	MYOG|TGFB2|HOMER1|SEMA3C|TBX3|VEGFA|CHRND|RCAN1|CSRP3|ACTC1|TEP1|XIRP1|VGLL2|CTSB
45935	0.0010053	0.030651	42	434	470	7935	positive regulation of nucleobase, nucleoside, nucleotide and nucleic acid metabolic process	ATF1|CSRNP1|CITED2|GABPB1|HIF1A|ABRA|ETS2|FSTL3|GLIS2|ARNTL|MYC|E2F3|SOX9|PKNOX1|JUNB|PPARGC1A|SOX4|MYOG|MAP2K3|SPEN|ZNF462|AKIRIN2|EGR1|MAP2K1|SMAD3|RBM15|FOS|MAFA|HNRNPAB|TBX3|TNFRSF1A|VEGFA|NR4A1|KLF6|KLF5|NR4A3|GDNF|DDIT3|RARA|NAA15|VGLL2|TP53
48568	0.0010132	0.030651	15	103	470	7935	embryonic organ development	MAP2K1|SMAD3|CITED2|ADM|WNT9A|CYR61|VEGFA|ALDH1A3|NR4A3|DDIT3|KCNQ4|JUNB|SH2B3|BMPR1A|FGFR1
45766	0.0010568	0.031638	6	21	470	7935	positive regulation of angiogenesis	ANGPT2|ANGPTL2|HIF1A|HDAC9|TNFRSF1A|VEGFA
9605	0.0010981	0.032534	28	255	470	7935	response to external stimulus	CDKN1A|TULP4|ADM|VLDLR|CYR61|PLAU|JUNB|PPARGC1A|IL6R|CTSB|MAP2K1|TGFB2|ANGPT2|HSPA5|WNT9A|FOS|ACSL3|GLRX2|ATG14|SIRT1|VEGFA|COL1A1|NR4A3|TEP1|DDIT3|RARA|TP53|CD44
60485	0.0011987	0.034307	8	37	470	7935	mesenchyme development	ATF1|TGFB2|SEMA3C|GDNF|SOX9|HIF1A|HNRNPAB|FGFR1
42026	0.0012056	0.034307	4	9	470	7935	protein refolding	DNAJB1|HSP90AA1|HSPA1B|HSPA1A
30947	0.0012056	0.034307	4	9	470	7935	regulation of vascular endothelial growth factor receptor signaling pathway	NEDD4|ITGA5|HIF1A|VEGFA
48536	0.0012056	0.034307	4	9	470	7935	spleen development	SPEN|ADAM17|RBM15|NFKB2
1763	0.0012311	0.034566	12	74	470	7935	morphogenesis of a branching structure	GNA13|SPEN|RBM15|SEMA3C|MYC|ADM|SOX9|TBX3|CD44|NKX3-1|VEGFA|FGFR1
1666	0.0012388	0.034566	15	105	470	7935	response to hypoxia	EGLN3|TGFB2|ANGPT2|SMAD3|CITED2|ADM|VLDLR|HIF1A|VEGFA|ADAM17|PLAU|PIM1|UBQLN1|ANGPTL2|CRYAB
60548	0.0013139	0.036309	28	258	470	7935	negative regulation of cell death	ATF1|CDKN1A|CITED2|TNFAIP3|HSPB1|IRS2|PPP2CB|BAG3|PIM1|SOX4|IER3|CTSB|PRNP|SMAD3|HSPA5|SORT1|TBX3|VEGFA|ADAM17|GDNF|TEP1|ANGPTL2|CRYAB|TP53|HSPA1B|CD44|HSPA1A|FGFR1
7507	0.0015913	0.043507	20	164	470	7935	heart development	SPEN|TGFB2|SMAD3|RBM15|SEMA3C|CITED2|ADM|HDAC9|TBX3|VEGFA|CSRP3|ACTC1|TEP1|ADAMTS1|XIRP1|ALPK3|SOX9|SOX4|NKX3-1|BMPR1A
43066	0.0016141	0.043507	27	249	470	7935	negative regulation of apoptosis	ATF1|CDKN1A|CITED2|TNFAIP3|HSPB1|IRS2|PPP2CB|BAG3|PIM1|SOX4|IER3|PRNP|SMAD3|HSPA5|SORT1|TBX3|VEGFA|ADAM17|GDNF|TEP1|ANGPTL2|CRYAB|TP53|HSPA1B|CD44|HSPA1A|FGFR1
60429	0.0016198	0.043507	21	176	470	7935	epithelium development	ATF1|SPEN|ERRFI1|CD63|MAP2K1|SMAD3|RBM15|SEMA3C|ADM|TBX3|VEGFA|GNA13|ALDH1A3|GDNF|S100A16|MYC|SOX9|CD44|VCL|NKX3-1|FGFR1
34284	0.001721	0.044966	8	39	470	7935	response to monosaccharide stimulus	EGR1|ANGPT2|TEP1|IRS2|MAFA|GLUL|PPARD|CTSB
9746	0.001721	0.044966	8	39	470	7935	response to hexose stimulus	EGR1|ANGPT2|TEP1|IRS2|MAFA|GLUL|PPARD|CTSB
9749	0.001721	0.044966	8	39	470	7935	response to glucose stimulus	EGR1|ANGPT2|TEP1|IRS2|MAFA|GLUL|PPARD|CTSB
10464	0.001806	0.04676	5	16	470	7935	regulation of mesenchymal cell proliferation	MYC|IRS2|VEGFA|BMPR1A|FGFR1
32225	0.0018874	0.047583	3	5	470	7935	regulation of synaptic transmission, dopaminergic	ATF1|GDNF|KCNQ4
32722	0.0018874	0.047583	3	5	470	7935	positive regulation of chemokine production	ADAM17|HIF1A|IL6R
32731	0.0018874	0.047583	3	5	470	7935	positive regulation of interleukin-1 beta production	PANX1|SMAD3|JAK2
43069	0.0019229	0.048056	27	252	470	7935	negative regulation of programmed cell death	ATF1|CDKN1A|CITED2|TNFAIP3|HSPB1|IRS2|PPP2CB|BAG3|PIM1|SOX4|IER3|PRNP|SMAD3|HSPA5|SORT1|TBX3|VEGFA|ADAM17|GDNF|TEP1|ANGPTL2|CRYAB|TP53|HSPA1B|CD44|HSPA1A|FGFR1
Down-regulated in young muscle 5 h post-ECC exercise:
10468	5.1209e-05	0.035146	59	1898	155	7935	regulation of gene expression	CDKN1C|ZNF174|CDKN1B|LDB1|CDCA7L|SIX1|IKZF2|NR3C2|HOXA11|ZXDA|DBP|BCL7A|SIN3A|PITX3|TCF15|MAMSTR|TSC22D3|SOX13|ATP1B4|TSC1|VEZF1|RGMB|RBL1|SMO|RFX7|IRF2|TXNIP|MASP1|ZNF555|ZNF554|ZNF594|CEBPB|ZNF273|HLF|TSHZ1|GATA2|TOB2|ZNF549|HES1|ZNF148|BARD1|CASP8AP2|KDM4A|SETD1B|NR1D2|LBX1|ZFHX4|ACVR2B|NFKBIA|TNRC6C|PER1|PER3|ZNF619|H2AFY2|TEF|ZNF618|ID1|RCOR3|TNRC6B
65007	5.3138e-05	0.035146	105	4142	155	7935	biological regulation	SLC27A1|ZNF174|AVIL|AQP4|IKZF2|TXNDC16|NR3C2|HOXA11|ZXDA|CNST|RGS3|SESN1|LZTS2|PITX3|RAB2B|MAMSTR|SOX13|ATP1B4|TSC1|SMO|RFX7|RGS9BP|DDIT4|TXNIP|MASP1|ZNF555|ZNF554|ZNF273|NDRG3|TSHZ1|SLC1A3|GATA2|ADIPOR2|RHOBTB1|SGPL1|BAG4|ZNF549|FADD|ZNF148|MDN1|BARD1|ABCA1|SETD1B|NR1D2|HPS6|ZFHX4|GADD45G|NFKBIA|H2AFY2|ID1|TAB1|RCOR3|CDKN1C|CDKN1B|PLEKHF1|LDB1|LRRK2|CDCA7L|SIX1|SLC6A1|DBP|BCL7A|SIN3A|APPL2|POLH|…
7166	0.00014493	0.035146	25	583	155	7935	cell surface receptor linked signaling pathway	AMER1|CX3CR1|LDB1|DIXDC1|NEDD9|SGPL1|P2RY1|HES1|LZTS2|APPL2|ABCA1|SLC12A2|ANGPT1|GAB1|RGMB|ACVR2B|NFKBIA|SMO|GLRB|ID1|TXNIP|TAB1|SOS1|GPRC5C|LGR5
50789	0.00015756	0.035146	100	3964	155	7935	regulation of biological process	SLC27A1|ZNF174|AVIL|IKZF2|TXNDC16|NR3C2|HOXA11|ZXDA|CNST|RGS3|SESN1|LZTS2|PITX3|RAB2B|MAMSTR|SOX13|ATP1B4|TSC1|SMO|RFX7|RGS9BP|DDIT4|TXNIP|MASP1|ZNF555|ZNF554|ZNF273|NDRG3|TSHZ1|SLC1A3|GATA2|ADIPOR2|RHOBTB1|SGPL1|BAG4|ZNF549|FADD|ZNF148|MDN1|BARD1|ABCA1|SETD1B|NR1D2|ZFHX4|GADD45G|NFKBIA|H2AFY2|ID1|TAB1|RCOR3|CDKN1C|CDKN1B|PLEKHF1|LDB1|LRRK2|CDCA7L|SIX1|SLC6A1|DBP|BCL7A|SIN3A|APPL2|POLH|TCF15|TSC2…
45449	0.00019086	0.035146	52	1674	155	7935	regulation of transcription	CDKN1C|ZNF174|CDKN1B|LDB1|CDCA7L|SIX1|IKZF2|NR3C2|HOXA11|ZXDA|DBP|BCL7A|SIN3A|PITX3|TCF15|MAMSTR|TSC22D3|SOX13|ATP1B4|VEZF1|RGMB|RBL1|SMO|RFX7|IRF2|TXNIP|ZNF555|ZNF554|ZNF594|CEBPB|ZNF273|HLF|TSHZ1|GATA2|ZNF549|HES1|ZNF148|CASP8AP2|KDM4A|SETD1B|NR1D2|LBX1|ZFHX4|ACVR2B|NFKBIA|PER1|PER3|ZNF619|TEF|ZNF618|ID1|RCOR3
19219	0.0002054	0.035146	57	1899	155	7935	regulation of nucleobase, nucleoside, nucleotide and nucleic acid metabolic process	CDKN1C|ZNF174|CDKN1B|LDB1|CDCA7L|SIX1|IKZF2|NR3C2|HOXA11|ZXDA|DBP|BCL7A|SIN3A|POLH|PITX3|TCF15|MAMSTR|TSC22D3|SOX13|ATP1B4|TSC1|VEZF1|RGMB|RBL1|SMO|RFX7|IRF2|TXNIP|ZNF555|ZNF554|ZNF594|CEBPB|ZNF273|HLF|TSHZ1|GATA2|FGD4|ZNF549|HES1|ZNF148|BARD1|ABCA1|CASP8AP2|KDM4A|SETD1B|NR1D2|LBX1|ZFHX4|ACVR2B|NFKBIA|PER1|PER3|ZNF619|TEF|ZNF618|ID1|RCOR3
31326	0.00023109	0.035146	57	1907	155	7935	regulation of cellular biosynthetic process	CDKN1C|SLC27A1|ZNF174|CDKN1B|LDB1|CDCA7L|SIX1|IKZF2|NR3C2|HOXA11|ZXDA|DBP|BCL7A|SIN3A|PITX3|TCF15|MAMSTR|TSC22D3|SOX13|ATP1B4|TSC1|VEZF1|RGMB|RBL1|SMO|RFX7|IRF2|TXNIP|ZNF555|ZNF554|ZNF594|CEBPB|ZNF273|HLF|TSHZ1|GATA2|ZNF549|HES1|ZNF148|ABCA1|CASP8AP2|KDM4A|SETD1B|NR1D2|LBX1|ZFHX4|ACVR2B|NFKBIA|TNRC6C|PER1|PER3|ZNF619|TEF|ZNF618|ID1|RCOR3|TNRC6B
50906	0.00024156	0.035146	3	7	155	7935	detection of stimulus involved in sensory perception	SLC12A2|RGS9BP|CHRNA10
51171	0.00024501	0.035146	57	1911	155	7935	regulation of nitrogen compound metabolic process	CDKN1C|ZNF174|CDKN1B|LDB1|CDCA7L|SIX1|IKZF2|NR3C2|HOXA11|ZXDA|DBP|BCL7A|SIN3A|POLH|PITX3|TCF15|MAMSTR|TSC22D3|SOX13|ATP1B4|TSC1|VEZF1|RGMB|RBL1|SMO|RFX7|IRF2|TXNIP|ZNF555|ZNF554|ZNF594|CEBPB|ZNF273|HLF|TSHZ1|GATA2|FGD4|ZNF549|HES1|ZNF148|BARD1|ABCA1|CASP8AP2|KDM4A|SETD1B|NR1D2|LBX1|ZFHX4|ACVR2B|NFKBIA|PER1|PER3|ZNF619|TEF|ZNF618|ID1|RCOR3
9889	0.00027123	0.035146	57	1918	155	7935	regulation of biosynthetic process	CDKN1C|SLC27A1|ZNF174|CDKN1B|LDB1|CDCA7L|SIX1|IKZF2|NR3C2|HOXA11|ZXDA|DBP|BCL7A|SIN3A|PITX3|TCF15|MAMSTR|TSC22D3|SOX13|ATP1B4|TSC1|VEZF1|RGMB|RBL1|SMO|RFX7|IRF2|TXNIP|ZNF555|ZNF554|ZNF594|CEBPB|ZNF273|HLF|TSHZ1|GATA2|ZNF549|HES1|ZNF148|ABCA1|CASP8AP2|KDM4A|SETD1B|NR1D2|LBX1|ZFHX4|ACVR2B|NFKBIA|TNRC6C|PER1|PER3|ZNF619|TEF|ZNF618|ID1|RCOR3|TNRC6B
51252	0.00028511	0.035146	38	1109	155	7935	regulation of RNA metabolic process	CDKN1C|CEBPB|ZNF174|ZNF273|CDKN1B|HLF|LDB1|TSHZ1|SIX1|IKZF2|GATA2|NR3C2|HOXA11|DBP|SIN3A|ZNF549|HES1|ZNF148|PITX3|BARD1|TCF15|TSC22D3|NR1D2|VEZF1|LBX1|ZFHX4|NFKBIA|PER1|PER3|RBL1|SMO|TEF|RFX7|ID1|IRF2|TXNIP|ZNF555|ZNF554
6355	0.00030936	0.035146	37	1073	155	7935	regulation of transcription, DNA-dependent	CDKN1C|CEBPB|ZNF174|ZNF273|CDKN1B|HLF|LDB1|TSHZ1|SIX1|IKZF2|GATA2|NR3C2|HOXA11|DBP|SIN3A|ZNF549|HES1|ZNF148|PITX3|TCF15|TSC22D3|NR1D2|VEZF1|LBX1|ZFHX4|NFKBIA|PER1|PER3|RBL1|SMO|TEF|RFX7|ID1|IRF2|TXNIP|ZNF555|ZNF554
6814	0.00031421	0.035146	6	48	155	7935	sodium ion transport	SLC12A2|ATP1B4|SLC12A6|SLC38A3|SCN2B|SLC38A4
6865	0.00031421	0.035146	6	48	155	7935	amino acid transport	SLC7A8|SLC43A1|SLC1A3|SLC6A1|SLC38A3|SLC38A4
50794	0.00034566	0.035395	95	3770	155	7935	regulation of cellular process	CDKN1C|SLC27A1|ZNF174|CDKN1B|PLEKHF1|LDB1|AVIL|LRRK2|CDCA7L|SIX1|IKZF2|SLC6A1|TXNDC16|NR3C2|HOXA11|ZXDA|CNST|RGS3|DBP|BCL7A|SIN3A|SESN1|LZTS2|APPL2|POLH|PITX3|RAB2B|TCF15|MAMSTR|TSC22D3|SOX13|GAB1|ATP1B4|TSC1|VEZF1|RGMB|DUSP7|RBL1|SMO|RFX7|RGS9BP|DDIT4|IRF2|TXNIP|ZNF555|SOS1|ZNF554|CX3CR1|ZNF594|CEBPB|ZNF273|NDRG3|PLEKHH3|HLF|TSHZ1|NEDD9|SLC1A3|GATA2|TOB2|CXXC5|ADIPOR2|APOLD1|RHOBTB1|FGD4|BAG4|RA…
48664	0.00037915	0.035395	2	2	155	7935	neuron fate determination	HES1|LBX1
10556	0.00039044	0.035395	55	1854	155	7935	regulation of macromolecule biosynthetic process	CDKN1C|ZNF174|CDKN1B|LDB1|CDCA7L|SIX1|IKZF2|NR3C2|HOXA11|ZXDA|DBP|BCL7A|SIN3A|PITX3|TCF15|MAMSTR|TSC22D3|SOX13|ATP1B4|TSC1|VEZF1|RGMB|RBL1|SMO|RFX7|IRF2|TXNIP|ZNF555|ZNF554|ZNF594|CEBPB|ZNF273|HLF|TSHZ1|GATA2|ZNF549|HES1|ZNF148|CASP8AP2|KDM4A|SETD1B|NR1D2|LBX1|ZFHX4|ACVR2B|NFKBIA|TNRC6C|PER1|PER3|ZNF619|TEF|ZNF618|ID1|RCOR3|TNRC6B
60255	0.00040684	0.035395	63	2220	155	7935	regulation of macromolecule metabolic process	CDKN1C|ZNF174|CDKN1B|LDB1|LRRK2|CDCA7L|SIX1|IKZF2|NR3C2|HOXA11|ZXDA|DBP|BCL7A|SIN3A|POLH|PITX3|TCF15|MAMSTR|TSC22D3|SOX13|ATP1B4|TSC1|VEZF1|RGMB|RBL1|SMO|RFX7|IRF2|TXNIP|MASP1|ZNF555|ZNF554|ZNF594|CEBPB|ZNF273|HLF|TSHZ1|GATA2|TOB2|FGD4|ZNF549|HES1|ZNF148|BARD1|CASP8AP2|KDM4A|ANGPT1|SETD1B|NR1D2|LBX1|ZFHX4|ACVR2B|NFKBIA|TNRC6C|PER1|PER3|ZNF619|H2AFY2|TEF|ZNF618|ID1|RCOR3|TNRC6B
6357	0.00048084	0.038052	22	522	155	7935	regulation of transcription from RNA polymerase II promoter	CDKN1C|CEBPB|ZNF174|HLF|TCF15|SIX1|VEZF1|IKZF2|GATA2|LBX1|NFKBIA|PER1|DBP|RBL1|SMO|TEF|SIN3A|ID1|IRF2|TXNIP|HES1|ZNF148
19222	0.00048598	0.038052	69	2514	155	7935	regulation of metabolic process	CDKN1C|SLC27A1|ZNF174|CDKN1B|LDB1|LRRK2|CDCA7L|SIX1|IKZF2|NR3C2|HOXA11|ZXDA|RGS3|DBP|BCL7A|SIN3A|POLH|PITX3|TCF15|MAMSTR|TSC22D3|SOX13|ATP1B4|TSC1|VEZF1|RGMB|DUSP7|RBL1|SMO|RFX7|IRF2|TXNIP|MASP1|ZNF555|ZNF554|ZNF594|CEBPB|ZNF273|HLF|TSHZ1|GATA2|TOB2|FGD4|ZNF549|HES1|ZNF148|BARD1|ABCA1|CASP8AP2|KDM4A|ANGPT1|SETD1B|NR1D2|LBX1|ZFHX4|ACVR2B|GADD45G|NFKBIA|TNRC6C|PER1|PER3|ZNF619|H2AFY2|TEF|ZNF618|ID1…
46942	0.00061822	0.044006	7	75	155	7935	carboxylic acid transport	SLC27A1|SLC7A8|SLC43A1|SLC1A3|SLC6A1|SLC38A3|SLC38A4
15849	0.00061822	0.044006	7	75	155	7935	organic acid transport	SLC27A1|SLC7A8|SLC43A1|SLC1A3|SLC6A1|SLC38A3|SLC38A4
31323	0.00069969	0.04764	66	2402	155	7935	regulation of cellular metabolic process	CDKN1C|SLC27A1|ZNF174|CDKN1B|LDB1|LRRK2|CDCA7L|SIX1|IKZF2|NR3C2|HOXA11|ZXDA|RGS3|DBP|BCL7A|SIN3A|POLH|PITX3|TCF15|MAMSTR|TSC22D3|SOX13|ATP1B4|TSC1|VEZF1|RGMB|DUSP7|RBL1|SMO|RFX7|IRF2|TXNIP|ZNF555|ZNF554|ZNF594|CEBPB|ZNF273|HLF|TSHZ1|GATA2|FGD4|ZNF549|HES1|ZNF148|BARD1|ABCA1|CASP8AP2|KDM4A|ANGPT1|SETD1B|NR1D2|LBX1|ZFHX4|ACVR2B|GADD45G|NFKBIA|TNRC6C|PER1|PER3|ZNF619|TEF|ZNF618|ID1|TAB1|RCOR3|TNRC6B
21575	0.00079315	0.049683	3	10	155	7935	hindbrain morphogenesis	SMO|LDB1|HES1
15807	0.00079315	0.049683	3	10	155	7935	L-amino acid transport	SLC1A3|SLC6A1|SLC38A3

## Sheet: Older post-CON (BP)
GO-ID	P-raw	P-corrected	Observed DE genes	Total genes in GO-ID	Total DE genes in GO analysis	Total genes in GO	GO description	Genes in test set
Up-regulated in older muscle 5 h post-CON exercise:
1944	4.0517e-12	1.0353e-08	43	214	514	8227	vasculature development	NRP1|COL18A1|LAMA5|ROBO4|PLXND1|CITED2|LAMA4|ZFAND5|CHD7|ECSCR|THY1|CYR61|ELK3|TYMP|CDH5|GJA1|ZMIZ1|PLAU|KDR|HMOX1|WASF2|SPEN|TGFB2|RBM15|ANXA2|TNFRSF12A|CAV1|BGN|TGFBR2|COL1A1|MYO1E|MMP14|COL3A1|COL1A2|ADAM15|LOX|COL5A1|TEP1|COL4A1|MYH9|CSPG4|ANXA2P2|CD44
1568	7.2701e-12	1.0353e-08	42	209	514	8227	blood vessel development	NRP1|COL18A1|LAMA5|ROBO4|PLXND1|CITED2|LAMA4|CHD7|ECSCR|THY1|CYR61|ELK3|TYMP|CDH5|GJA1|ZMIZ1|PLAU|KDR|HMOX1|WASF2|SPEN|TGFB2|RBM15|ANXA2|TNFRSF12A|CAV1|BGN|TGFBR2|COL1A1|MYO1E|MMP14|COL3A1|COL1A2|ADAM15|LOX|COL5A1|TEP1|COL4A1|MYH9|CSPG4|ANXA2P2|CD44
30198	2.7002e-11	2.5634e-08	23	72	514	8227	extracellular matrix organization	COL18A1|TGFB2|ANXA2|LUM|LAMC1|CYR61|NFKB2|COL1A1|LGALS3|COL3A1|ADAMTS2|COL1A2|CCDC80|COL4A2|LOX|COL5A1|COL5A3|PXDN|BCL3|COL4A3|COL5A2|SERPINH1|ANXA2P2
30199	5.6374e-11	4.0138e-08	13	22	514	8227	collagen fibril organization	TGFB2|ANXA2|LUM|COL1A1|COL3A1|ADAMTS2|COL1A2|LOX|COL5A1|COL5A3|COL5A2|SERPINH1|ANXA2P2
43062	5.0807e-10	2.894e-07	25	96	514	8227	extracellular structure organization	CHRNA1|COL18A1|TNC|LAMC1|CYR61|LGALS3|ADAMTS2|SERPINH1|TGFB2|ANXA2|LUM|NFKB2|COL1A1|COL3A1|COL1A2|CCDC80|COL4A2|LOX|COL5A1|COL5A3|PXDN|BCL3|COL4A3|COL5A2|ANXA2P2
1525	3.4774e-09	1.6506e-06	27	120	514	8227	angiogenesis	NRP1|COL18A1|LAMA5|ROBO4|PLXND1|ECSCR|THY1|CYR61|ELK3|TYMP|PLAU|KDR|HMOX1|WASF2|SPEN|TGFB2|RBM15|ANXA2|TNFRSF12A|TGFBR2|MMP14|ADAM15|TEP1|COL4A1|MYH9|CSPG4|ANXA2P2
32502	4.1846e-09	1.7025e-06	170	1834	514	8227	developmental process	CYFIP1|DGKD|SPARC|CSF1|PLXND1|WIPF3|NAB2|ZFAND5|TNC|ETS2|ELK3|ERO1L|LOXL2|CDH5|NRBP2|LGALS3|GJA1|DACH1|ZMIZ1|PLAU|MYC|ARHGDIA|CREB3L2|KDR|PLCE1|IL6R|TP63|SOX4|SEMA6B|ARSA|IGFBP4|FST|DAPK3|IGFBP2|SLC11A2|IFRD1|RFX3|EBF2|PCOLCE|ACSL3|MAPK8IP3|RUNX1|ADAM15|LOX|TEP1|COL4A1|RUFY3|COL4A3|KCNQ4|TAGLN2|ALPK3|SIK1|TP53|CHRNA1|SDC4|CHRD|ECSCR|THY1|HMOX1|IGFBP7|PPARGC1A|SOCS7|EGR1|PHC2|TGFB2|VCAM1|MCAM|CAV1…
48514	5.6162e-09	1.9994e-06	33	173	514	8227	blood vessel morphogenesis	NRP1|COL18A1|LAMA5|ROBO4|PLXND1|CITED2|ECSCR|THY1|CYR61|ELK3|TYMP|GJA1|ZMIZ1|PLAU|KDR|HMOX1|WASF2|SPEN|TGFB2|RBM15|ANXA2|TNFRSF12A|CAV1|BGN|TGFBR2|MYO1E|MMP14|ADAM15|TEP1|COL4A1|MYH9|CSPG4|ANXA2P2
32501	9.2313e-09	2.9212e-06	185	2065	514	8227	multicellular organismal process	CYFIP1|GUCY1B3|DGKD|SPARC|CSF1|PLXND1|WIPF3|NAB2|ZFAND5|TNC|ACTG2|ETS2|ELK3|FAM134B|CDH5|NRBP2|LGALS3|GJA1|DACH1|EFEMP1|ZMIZ1|PLAU|MYC|ARHGDIA|CREB3L2|KDR|PLCE1|CYP1B1|HMCN1|IL6R|TP63|SOX4|SEMA6B|ARSA|TPM4|IGFBP4|IL1R1|FST|DAPK3|SLC11A2|IFRD1|RFX3|EBF2|PCOLCE|ACSL3|MAPK8IP3|RUNX1|ADAM15|LOX|TEP1|COL4A1|RUFY3|COL4A3|APLNR|KCNQ4|TAGLN2|ALPK3|SIK1|TP53|CHRNA1|SDC4|CHRD|ECSCR|THY1|SDCBP|CALD1|SERPINH…
23052	1.4462e-08	4.1189e-06	159	1710	514	8227	signaling	GUCY1B3|DGKD|PLXND1|CERK|NAB2|ZFAND5|TNC|ELK3|ERO1L|CDC14B|GJA1|PLAU|ARHGDIA|KDR|PDK4|PLCE1|MAP3K8|IL6R|PDE8A|PLEKHM1P|TP63|SOX4|MAP2K3|PPP1R16B|CD97|CAST|IGFBP4|IL1R1|FST|DAPK3|IGFBP2|DGKZ|MAPK8IP3|TIAM2|POR|TEP1|COL4A3|APLNR|SIK1|SIK2|TP53|XPR1|CHRNA1|PTGFR|RRAD|CHRD|ELTD1|ARHGAP17|THY1|IQGAP1|CORO1C|RHOBTB2|C3|INPP5B|SDCBP|UBR5|HMOX1|TNFRSF14|SOCS6|PPARGC1A|SOCS7|PPARGC1B|S100A10|MARK1|ABCA1|T…
48856	2.8811e-08	7.4594e-06	143	1506	514	8227	anatomical structure development	CYFIP1|SPARC|CSF1|PLXND1|NAB2|ZFAND5|TNC|ETS2|ELK3|CDH5|NRBP2|LGALS3|GJA1|ZMIZ1|PLAU|MYC|ARHGDIA|CREB3L2|KDR|PLCE1|IL6R|TP63|SOX4|SEMA6B|ARSA|IGFBP4|FST|DAPK3|SLC11A2|IFRD1|RFX3|ACSL3|MAPK8IP3|RUNX1|ADAM15|LOX|TEP1|COL4A1|RUFY3|COL4A3|KCNQ4|TAGLN2|ALPK3|TP53|CHRNA1|SDC4|CHRD|ECSCR|THY1|HMOX1|EGR1|TGFB2|VCAM1|MCAM|CAV1|FZD6|EIF2AK3|CRIM1|SYNJ2|FLI1|DCLK1|NFKB2|COL1A1|DAB2|COL1A2|CDK6|BMP1|NR4A3|CO…
22610	8.4866e-08	1.8592e-05	49	354	514	8227	biological adhesion	SRPX|NRP1|COL18A1|SNED1|CLSTN3|TNC|PIK3CB|LAMC1|PVR|RND3|CYR61|LOXL2|CDH5|STAB1|CD97|VWF|TNFRSF12A|ITGA3|ACTN1|ITGA1|CLDN5|VCAN|ADAM15|COL4A3|COL6A1|PECAM1|MYH9|PKP4|KIFC3|TKT|CD44|LAMA5|CD151|FBLIM1|THY1|NID2|LPP|ARVCF|IGFBP7|TRPM7|VCAM1|MCAM|MSN|PARVA|COL3A1|BMP1|COL5A1|COL5A3|BCAR1
7155	8.4866e-08	1.8592e-05	49	354	514	8227	cell adhesion	SRPX|NRP1|COL18A1|SNED1|CLSTN3|TNC|PIK3CB|LAMC1|PVR|RND3|CYR61|LOXL2|CDH5|STAB1|CD97|VWF|TNFRSF12A|ITGA3|ACTN1|ITGA1|CLDN5|VCAN|ADAM15|COL4A3|COL6A1|PECAM1|MYH9|PKP4|KIFC3|TKT|CD44|LAMA5|CD151|FBLIM1|THY1|NID2|LPP|ARVCF|IGFBP7|TRPM7|VCAM1|MCAM|MSN|PARVA|COL3A1|BMP1|COL5A1|COL5A3|BCAR1
48513	1.2459e-07	2.5345e-05	104	1019	514	8227	organ development	CSF1|PLXND1|NAB2|ZFAND5|TNC|ELK3|CDH5|GJA1|ZMIZ1|PLAU|MYC|CREB3L2|KDR|PLCE1|IL6R|TP63|SOX4|FST|SLC11A2|RFX3|ACSL3|MAPK8IP3|RUNX1|ADAM15|LOX|TEP1|COL4A1|COL4A3|KCNQ4|TAGLN2|ALPK3|TP53|CHRNA1|CHRD|ECSCR|THY1|HMOX1|EGR1|TGFB2|VCAM1|CAV1|FZD6|EIF2AK3|SYNJ2|FLI1|DCLK1|NFKB2|COL1A1|COL1A2|BMP1|NR4A3|COL5A1|COL5A3|BCL3|COL5A2|CSPG4|ANXA2P2|NRP1|COL18A1|CDKN1A|CLIC4|ECM1|ROBO4|CITED2|ELN|CHD7|LAMC1|CYR61…
48731	1.5515e-07	2.9457e-05	130	1368	514	8227	system development	CYFIP1|SPARC|CSF1|PLXND1|NAB2|ZFAND5|TNC|ETS2|ELK3|CDH5|NRBP2|LGALS3|GJA1|ZMIZ1|PLAU|MYC|ARHGDIA|CREB3L2|KDR|PLCE1|IL6R|TP63|SOX4|SEMA6B|ARSA|IGFBP4|FST|DAPK3|SLC11A2|RFX3|ACSL3|MAPK8IP3|RUNX1|ADAM15|LOX|TEP1|COL4A1|RUFY3|COL4A3|KCNQ4|TAGLN2|ALPK3|TP53|CHRNA1|CHRD|ECSCR|THY1|HMOX1|EGR1|TGFB2|VCAM1|CAV1|FZD6|EIF2AK3|CRIM1|SYNJ2|FLI1|DCLK1|NFKB2|COL1A1|COL1A2|CDK6|BMP1|NR4A3|COL5A1|COL5A3|BCL3|COL5…
48869	3.1224e-07	5.5578e-05	97	947	514	8227	cellular developmental process	CYFIP1|CSF1|WIPF3|NAB2|TNC|ERO1L|LGALS3|GJA1|ZMIZ1|ARHGDIA|CREB3L2|KDR|TP63|SOX4|SEMA6B|FST|DAPK3|SLC11A2|IFRD1|RFX3|MAPK8IP3|RUNX1|TEP1|COL4A1|RUFY3|TP53|CHRNA1|ECSCR|THY1|PPARGC1A|SOCS7|EGR1|TGFB2|VCAM1|CAV1|EIF2AK3|DCLK1|NFKB2|COL1A1|DAB2|CDK6|BMP1|BCL3|PLXNB2|CSPG4|NRP1|COL18A1|CLIC4|ROBO4|CITED2|MAST2|CHD7|LAMC1|SYNE1|PTPRG|CYP26B1|SCML1|MECOM|SH3PXD2B|NCS1|TIMP1|EDARADD|ANXA1|TNFRSF12A|DYNL…
30154	3.9221e-07	6.5707e-05	94	913	514	8227	cell differentiation	CYFIP1|NRP1|COL18A1|CLIC4|ROBO4|CSF1|CITED2|MAST2|WIPF3|NAB2|CHD7|TNC|LAMC1|ERO1L|SYNE1|PTPRG|LGALS3|GJA1|CYP26B1|SCML1|MECOM|ZMIZ1|ARHGDIA|CREB3L2|SH3PXD2B|NCS1|KDR|TIMP1|TP63|SOX4|EDARADD|SEMA6B|ANXA1|TNFRSF12A|DYNLT1|FST|DAPK3|ITGA1|SLC11A2|IFRD1|RFX3|MAPK8IP3|RUNX1|TGFBR2|MMP14|VCAN|TEP1|COL4A1|RUFY3|ANGPTL2|MYH9|ANGPTL4|TP53|CD44|CHRNA1|CD63|LAMA5|C1S|LAMA4|ECSCR|THY1|RELB|TYMP|NRAS|IFI16|LM…
7275	4.5265e-07	7.1619e-05	150	1670	514	8227	multicellular organismal development	CYFIP1|DGKD|SPARC|CSF1|PLXND1|WIPF3|NAB2|ZFAND5|TNC|ETS2|ELK3|CDH5|NRBP2|LGALS3|GJA1|DACH1|ZMIZ1|PLAU|MYC|ARHGDIA|CREB3L2|KDR|PLCE1|IL6R|TP63|SOX4|SEMA6B|ARSA|IGFBP4|FST|DAPK3|SLC11A2|IFRD1|RFX3|EBF2|PCOLCE|ACSL3|MAPK8IP3|RUNX1|ADAM15|LOX|TEP1|COL4A1|RUFY3|COL4A3|KCNQ4|TAGLN2|ALPK3|SIK1|TP53|CHRNA1|SDC4|CHRD|ECSCR|THY1|HMOX1|IGFBP7|EGR1|PHC2|TGFB2|VCAM1|CAV1|FZD6|EIF2AK3|CRIM1|SYNJ2|FLI1|DCLK1|NF…
40011	8.6745e-07	0.00013003	34	222	514	8227	locomotion	NRP1|LAMA5|ZFAND5|ECSCR|PIK3CB|LAMC1|ATP1A1|PVR|CYR61|TYMP|SDCBP|GJA1|PLAU|WASF2|IL6R|TGFB2|VCAM1|TNFRSF12A|ITGA1|RFX3|MSN|DGKZ|DCLK1|MMP14|VCAN|COL5A1|TEP1|NEDD4|PPAP2A|PECAM1|MYH9|PLP2|BCAR1|CD44
32964	9.3468e-07	0.0001331	5	5	514	8227	collagen biosynthetic process	COL1A1|COL3A1|COL5A1|SERPINH1|TRAM2
9653	1.4279e-06	0.00019365	78	735	514	8227	anatomical structure morphogenesis	CYFIP1|NRP1|COL18A1|CDKN1A|ROBO4|CSF1|PLXND1|CITED2|ELN|NAB2|ZFAND5|CHD7|TNC|LAMC1|CYR61|ELK3|GJA1|CYP26B1|SCML1|ZMIZ1|PLAU|MYC|KDR|TP63|EDARADD|RBM15|ANXA2|TNFRSF12A|FST|ITGA1|SLC11A2|BGN|MAPK8IP3|PTBP3|TGFBR2|ACTA2|MMP14|VCAN|ADAM15|TEP1|COL4A1|KCNQ4|MYH9|ARHGEF2|TP53|CD44|LAMA5|CHRD|ECSCR|THY1|TYMP|XIRP1|HMOX1|S1PR3|PCNT|WASF2|SPEN|TGFB2|ANGPT2|VCAM1|MCAM|CAV1|FZD6|STAT3|FLI1|DCLK1|COL1A1|MYO1…
50793	1.8194e-06	0.00023553	56	472	514	8227	regulation of developmental process	CYFIP1|NRP1|ECM1|CSF1|NAB2|PTPRG|GJA1|MYC|ARHGDIA|STAB1|SH3PXD2B|NCS1|KDR|IL6R|TP63|RBM15|TNFRSF12A|DYNLT1|FST|FNDC3B|VASH1|RUNX1|TGFBR2|COL4A2|TEP1|RUFY3|COL4A3|RARA|ANGPTL2|MYH9|SIK1|ANGPTL4|TP53|LAMA5|FBLIM1|LAMA4|CHRD|THY1|C3|FGD5|PALMD|HMOX1|CD276|ABCA1|SPEN|TGFB2|ANGPT2|ABCA5|CAV1|EIF2AK3|HPS4|CDK6|BMP1|MAFF|PLXNB2|BAX
32963	2.1468e-06	0.00026583	7	12	514	8227	collagen metabolic process	COL1A1|COL3A1|ADAMTS2|ADAM15|COL5A1|SERPINH1|TRAM2
23033	2.6115e-06	0.0003099	113	1205	514	8227	signaling pathway	GUCY1B3|DGKD|CERK|ZFAND5|ERO1L|CDC14B|ARHGDIA|KDR|PLCE1|IL6R|PLEKHM1P|TP63|SOX4|CD97|CAST|IL1R1|FST|DAPK3|DGKZ|MAPK8IP3|POR|TEP1|COL4A3|APLNR|SIK1|SIK2|TP53|XPR1|PTGFR|RRAD|CHRD|ELTD1|THY1|RHOBTB2|C3|SDCBP|UBR5|HMOX1|TNFRSF14|SOCS6|PPARGC1A|SOCS7|PPARGC1B|MARK1|ABCA1|TGFB2|CAV1|FZD6|EIF2AK3|TNFRSF10B|GNG11|COL1A2|RHEB|BCL3|CCDC88C|FAM175A|GPSM2|CDKN1A|MCTP1|ARHGAP1|PRKAG2|PIK3CB|RND3|PTPRG|YWHAQ|…
30029	3.1541e-06	0.00035932	30	194	514	8227	actin filament-based process	ARHGAP17|RND3|LIMA1|CNN1|SDCBP|NRAS|FGD5|CALD1|TMSB4X|EPB41L3|XIRP1|FLNA|FLNB|RICTOR|TRPM7|TMSB10|WASF2|MYO5A|PARVA|ACTN4|SHROOM4|EHD2|MYO1E|DIAPH1|INF2|FMNL2|CAPZA1|MYH9|ARHGEF2|BCAR1
51239	4.1679e-06	0.00045654	64	581	514	8227	regulation of multicellular organismal process	NRP1|ECM1|CSF1|MAST2|NAB2|CHD7|TNC|PTPRG|PANX1|GJA1|PLAU|MYC|ARHGDIA|STAB1|NCS1|PLCE1|IL6R|TP63|RBM15|ANXA2|TNFRSF12A|DYNLT1|FST|VASH1|SYTL2|RUNX1|TGFBR2|COL4A2|TEP1|RUFY3|COL4A3|RARA|ANGPTL2|KCNQ4|ANGPTL4|TP53|HBEGF|CD63|LAMA5|SDC4|LAMA4|CHRD|THY1|ATP1A1|C3|CNN1|NRAS|HMOX1|S1PR3|CD276|SPEN|EGR1|TGFB2|ANGPT2|CAV1|STAT3|EIF2AK3|CDK6|BMP1|BCL3|MAFF|PLXNB2|BAX|ANXA2P2
7166	4.5357e-06	0.00047844	66	607	514	8227	cell surface receptor linked signaling pathway	GPSM2|DGKD|CERK|ZFAND5|PIK3CB|PTPRG|KDR|PLCE1|IL6R|SOX4|CD97|CAST|ANXA1|RBM15|ARHGEF12|ITGA3|IL1R1|FST|ITGA1|TNFRSF1B|OSMR|DGKZ|TGFBR2|POR|TEP1|PPAP2A|COL4A3|APLNR|MYH9|TKT|XPR1|HBEGF|PTGFR|LAMA5|ADCY4|CHRD|ELTD1|THY1|CBL|FSTL1|C3|FLNA|TNFRSF14|S1PR3|SOCS7|WASF2|IL12RB2|ABCA1|SPEN|TGFB2|ANGPT2|SORT1|FZD6|STAT3|EIF2AK3|TNFRSF10B|GNG11|MYO1E|COL3A1|COL1A2|CLEC2B|CCDC88C|RQCD1|PLP2|TEK|BCAR1
48646	5.7556e-06	0.00058543	37	273	514	8227	anatomical structure formation involved in morphogenesis	NRP1|COL18A1|LAMA5|ROBO4|PLXND1|CITED2|CHRD|ECSCR|THY1|CYR61|ELK3|TYMP|PLAU|XIRP1|KDR|HMOX1|WASF2|TP63|SPEN|TGFB2|RBM15|ANXA2|TNFRSF12A|FZD6|TGFBR2|COL1A1|MMP14|NR4A3|ADAM15|TEP1|COL4A1|PMP22|MYH9|CSPG4|ANXA2P2|TP53|CD44
30036	7.4457e-06	0.00073122	28	182	514	8227	actin cytoskeleton organization	ARHGAP17|RND3|LIMA1|CNN1|SDCBP|NRAS|FGD5|CALD1|TMSB4X|EPB41L3|XIRP1|FLNA|FLNB|RICTOR|TRPM7|TMSB10|WASF2|PARVA|ACTN4|SHROOM4|EHD2|DIAPH1|INF2|FMNL2|CAPZA1|MYH9|ARHGEF2|BCAR1
51260	7.8704e-06	0.00074716	17	81	514	8227	protein homooligomerization	PRNP|CPT1A|DGKD|ATL3|VWF|GPX3|CAV1|EIF2AK3|CCDC88C|HMOX1|ANGPTL2|STOM|BAX|ANGPTL4|OGT|PFKP|TP63
44259	8.3301e-06	0.00076529	7	14	514	8227	multicellular organismal macromolecule metabolic process	COL1A1|COL3A1|ADAMTS2|ADAM15|COL5A1|SERPINH1|TRAM2
30155	9.2711e-06	0.00082513	19	99	514	8227	regulation of cell adhesion	CD63|LAMA5|TGFB2|CSF1|SDC4|CITED2|LAMA4|CHRD|PIK3CB|CYR61|COL1A1|MMP14|CDK6|CCDC80|TEP1|PLAU|ARHGDIA|KDR|FXYD5
7186	1.3683e-05	0.0011809	22	129	514	8227	G-protein coupled receptor protein signaling pathway	ABCA1|CD97|PTGFR|GPSM2|DGKD|ARHGEF12|CERK|SORT1|ADCY4|ELTD1|PIK3CB|DGKZ|GNG11|C3|PPAP2A|APLNR|PLCE1|FLNA|S1PR3|WASF2|BCAR1|XPR1
43588	2.1654e-05	0.0018138	8	21	514	8227	skin development	COL1A1|COL3A1|ADAMTS2|COL1A2|COL5A1|COL5A3|COL5A2|TP63
6928	2.3317e-05	0.0018974	35	268	514	8227	cellular component movement	NRP1|LAMA5|ZFAND5|LAMC1|ATP1A1|PVR|SDCBP|GJA1|CALD1|ARHGDIA|WASF2|IL6R|CD97|TGFB2|ANXA1|VCAM1|TPM4|TNFRSF12A|STAT3|ITGA1|RFX3|MSN|DGKZ|MAPK8IP3|DCLK1|MMP14|VCAN|COL5A1|TEP1|CAPZA1|PPAP2A|PECAM1|MYH9|BCAR1|CD44
7165	2.7733e-05	0.0021566	99	1075	514	8227	signal transduction	DGKD|PLXND1|TNC|ELK3|CDC14B|PLAU|ARHGDIA|PDK4|PLCE1|MAP3K8|IL6R|MAP2K3|PPP1R16B|IGFBP4|IL1R1|DAPK3|IGFBP2|DGKZ|MAPK8IP3|TIAM2|SIK1|SIK2|TP53|CHRNA1|RRAD|ARHGAP17|IQGAP1|CORO1C|RHOBTB2|C3|INPP5B|SDCBP|HMOX1|SOCS6|S100A10|MARK1|ABCA1|CAV1|EIF2AK3|TNFRSF10B|ARHGAP27|GNG11|NFKB2|COL1A2|RHEB|BCL3|FAM175A|PLXNB2|OGT|NRP1|GPSM2|CDKN1A|MCTP1|ARHGAP1|PRKAG2|PIK3CB|RND3|YWHAQ|NCS1|ANKRD1|KIF13B|CLIC1|EDARA…
51674	2.8775e-05	0.0021566	27	185	514	8227	localization of cell	NRP1|LAMA5|ZFAND5|LAMC1|ATP1A1|PVR|SDCBP|GJA1|WASF2|IL6R|TGFB2|VCAM1|TNFRSF12A|ITGA1|RFX3|MSN|DGKZ|DCLK1|MMP14|VCAN|COL5A1|TEP1|PPAP2A|PECAM1|MYH9|BCAR1|CD44
48870	2.8775e-05	0.0021566	27	185	514	8227	cell motility	NRP1|LAMA5|ZFAND5|LAMC1|ATP1A1|PVR|SDCBP|GJA1|WASF2|IL6R|TGFB2|VCAM1|TNFRSF12A|ITGA1|RFX3|MSN|DGKZ|DCLK1|MMP14|VCAN|COL5A1|TEP1|PPAP2A|PECAM1|MYH9|BCAR1|CD44
50896	4.6456e-05	0.0033925	145	1735	514	8227	response to stimulus	IFITM3|DGKD|IFITM2|TNC|PLOD3|SMC5|ENO1|ELK3|ERO1L|CDC14B|GJA1|PLAU|MYC|CREB3L2|C1RL|CYP1B1|TRIM25|HMCN1|IL6R|TP63|CD97|ARSA|CPT1A|TPM4|ESCO1|IGFBP4|IL1R1|IGFBP2|SLC11A2|VASH1|ACTN4|ACSL3|DGKZ|MAPK8IP3|LOX|TEP1|COL4A3|TP53|CFB|CES2|XPR1|ABHD2|ECSCR|C3|SNN|UBR5|SERPINH1|HMOX1|TNFRSF14|IGFBP7|SOCS6|A2M|PPARGC1A|SOCS7|PPARGC1B|CD276|EGR1|PRNP|TGFB2|VCAM1|GADD45A|CAV1|EIF2AK3|GNG11|DCLK1|NFKB2|COL1A1|…
51270	5.5045e-05	0.0039192	25	171	514	8227	regulation of cellular component movement	NRP1|COL18A1|CD63|LAMA5|CLIC4|ROBO4|CSF1|CITED2|ABHD2|LAMA4|CHRD|THY1|PLAU|KDR|HMOX1|IL6R|SPAG9|TGFB2|ANGPT2|ACTN1|VASH1|ACTN4|TEP1|BCAR1|HBEGF
2376	6.8689e-05	0.0047714	49	447	514	8227	immune system process	IFITM3|TINAGL1|IFITM2|CSF1|CHD7|MECOM|C1RL|KDR|KIF13B|TRIM25|TIMP1|IL6R|SOX4|CD97|RBM15|IL1R1|FST|ITGA1|SLC11A2|TMEM173|TNFRSF1B|RUNX1|TGFBR2|PXDN|PECAM1|MYH9|TP53|CFB|C1S|C1R|THY1|RELB|C3|IFI16|NFIL3|TNFRSF14|ADSS|SH2B3|CD276|SPEN|EGR1|TGFB2|VCAM1|CAV1|MSN|NFKB2|MYO1E|BCL3|BCAR1
16477	7.3679e-05	0.0049814	25	174	514	8227	cell migration	NRP1|LAMA5|ZFAND5|LAMC1|PVR|SDCBP|GJA1|WASF2|IL6R|TGFB2|VCAM1|TNFRSF12A|ITGA1|MSN|DGKZ|DCLK1|MMP14|VCAN|COL5A1|TEP1|PPAP2A|PECAM1|MYH9|BCAR1|CD44
65008	7.7594e-05	0.0049814	83	886	514	8227	regulation of biological quality	CYFIP1|NRP1|CDKN1A|DGKD|CSF1|NAB2|TNC|ENO1|PIK3CB|PCSK7|SYNE1|CYP26B1|PLAU|MYC|TMSB4X|KDR|PLCE1|CYP1B1|TNKS1BP1|SH3BGRL3|TIMP1|TMSB10|SPTAN1|TP63|SOX4|ANXA2|VWF|TNFRSF12A|DYNLT1|ITGA1|SLC11A2|EMP3|ACTA2|TEP1|PLSCR4|APLNR|ANGPTL2|MYH9|ANGPTL4|TP53|HBEGF|FTL|CHRNA1|DDX5|FBLIM1|RRAD|SLC3A2|ATP1A1|CHRND|LIMA1|NRAS|FGD5|PALMD|XIRP1|HMOX1|FLNA|FLNB|S1PR3|PPARGC1A|ABCA1|EGR1|PRNP|NOP58|TGFB2|CAV1|STAT3|…
31589	7.8611e-05	0.0049814	15	78	514	8227	cell-substrate adhesion	SNED1|LAMA5|VWF|TNFRSF12A|ITGA3|ACTN1|ITGA1|THY1|LAMC1|NID2|COL3A1|ADAM15|COL5A3|TRPM7|CD44
10810	7.9861e-05	0.0049814	10	38	514	8227	regulation of cell-substrate adhesion	COL1A1|MMP14|CDK6|CCDC80|CSF1|SDC4|TEP1|KDR|PIK3CB|CYR61
22603	8.0457e-05	0.0049814	27	196	514	8227	regulation of anatomical structure morphogenesis	CYFIP1|NRP1|ECM1|CSF1|FBLIM1|THY1|C3|FGD5|PALMD|MYC|ARHGDIA|STAB1|KDR|HMOX1|TGFB2|ANGPT2|TNFRSF12A|VASH1|RUNX1|COL4A2|RUFY3|COL4A3|ANGPTL2|PLXNB2|MYH9|BAX|ANGPTL4
44236	9.2873e-05	0.0056277	7	19	514	8227	multicellular organismal metabolic process	COL1A1|COL3A1|ADAMTS2|ADAM15|COL5A1|SERPINH1|TRAM2
9888	9.9285e-05	0.0058909	46	417	514	8227	tissue development	CHRNA1|NRP1|COL18A1|CD63|LAMA5|CLIC4|ECM1|CSF1|PLXND1|CITED2|ZFAND5|TNC|CHRD|LAMC1|CHRND|GJA1|ADAMTS2|PLAU|MYC|CREB3L2|LMNA|XIRP1|KDR|TP63|EDARADD|SPEN|TGFB2|ANXA1|RBM15|FST|CAV1|FZD6|EIF2AK3|TGFBR2|COL1A1|COL3A1|COL1A2|BMP1|NR4A3|COL5A1|TEP1|COL4A1|COL5A3|COL5A2|VGLL2|CD44
48534	0.00011617	0.0067518	23	158	514	8227	hemopoietic or lymphoid organ development	SPEN|EGR1|TGFB2|VCAM1|RBM15|CSF1|FST|SLC11A2|CHD7|NFKB2|RUNX1|RELB|TGFBR2|MYO1E|MECOM|IFI16|BCL3|KDR|MYH9|TIMP1|SH2B3|TP53|SOX4
48545	0.00012003	0.006837	20	128	514	8227	response to steroid hormone stimulus	ARSA|CDKN1A|TGFB2|GPX3|CAV1|STAT3|IGFBP2|COL1A1|MMP14|FABP4|LOX|TEP1|UCP3|RARA|HMOX1|TRIM25|IGFBP7|A2M|IL6R|PPARGC1B
8544	0.00013967	0.0077995	14	73	514	8227	epidermis development	EDARADD|LAMA5|CLIC4|TGFB2|ANXA1|FST|COL1A1|COL3A1|ADAMTS2|COL1A2|COL5A1|COL5A3|COL5A2|TP63
45785	0.00015981	0.0085856	10	41	514	8227	positive regulation of cell adhesion	CD63|TGFB2|CDK6|CCDC80|CSF1|SDC4|CITED2|CHRD|KDR|CYR61
30334	0.00016068	0.0085856	22	151	514	8227	regulation of cell migration	SPAG9|COL18A1|CD63|LAMA5|CLIC4|ROBO4|TGFB2|ANGPT2|CSF1|CITED2|ABHD2|LAMA4|CHRD|THY1|VASH1|TEP1|PLAU|KDR|HMOX1|IL6R|BCAR1|HBEGF
9611	0.00016348	0.0085856	32	260	514	8227	response to wounding	ITIH4|NRP1|C1S|C1R|ABHD2|TNC|PIK3CB|ELK3|C3|GJA1|PLAU|STAB1|C1RL|HMOX1|S1PR3|A2M|IL6R|CD97|TGFB2|ANXA1|VCAM1|VWF|IGFBP4|MYOF|STAT3|COL3A1|VCAN|LOX|COL5A1|PLSCR4|CFB|CD44
7010	0.0001658	0.0085856	37	318	514	8227	cytoskeleton organization	LAMA5|ARHGAP17|THY1|RND3|SYNE1|LIMA1|CNN1|SDCBP|NRAS|FGD5|CALD1|TMSB4X|EPB41L3|XIRP1|PLCE1|FLNA|FLNB|RICTOR|TRPM7|PCNT|TMSB10|WASF2|MARK1|DYNLT1|GADD45A|PARVA|ACTN4|SHROOM4|EHD2|DIAPH1|INF2|FMNL2|CAPZA1|MYH9|BAX|ARHGEF2|BCAR1
32879	0.00017123	0.0087081	47	439	514	8227	regulation of localization	NRP1|COL18A1|CD63|LAMA5|CLIC4|ROBO4|CSF1|CITED2|ABHD2|LAMA4|CHD7|TNC|CHRD|PRKAG2|THY1|CBL|C3|PANX1|GJA1|PLAU|ARHGDIA|NCS1|KDR|HMOX1|FLNA|IL6R|ABCA1|SPAG9|CPT1A|TGFB2|ANXA1|ANGPT2|ANXA2|RBPMS|FST|ACTN1|CAV1|RFX3|VASH1|ACTN4|SYTL2|KIAA0226|TEP1|NEDD4|BCL3|BCAR1|HBEGF
48730	0.00018088	0.0089423	5	10	514	8227	epidermis morphogenesis	COL1A1|TGFB2|COL1A2|FST|TP63
51259	0.00018211	0.0089423	21	142	514	8227	protein oligomerization	PRNP|CPT1A|DGKD|ATL3|VWF|GPX3|CAV1|EIF2AK3|PARVA|GJA1|CCDC88C|HMOX1|ANGPTL2|STOM|BAX|ANGPTL4|TEK|OGT|TP53|PFKP|TP63
48583	0.0001888	0.0091135	34	285	514	8227	regulation of response to stimulus	C1S|C1R|THY1|PVR|C3|MECOM|PLAU|C1RL|KDR|HMOX1|A2M|IL6R|CD276|MAP3K2|TGFB2|ANGPT2|ANXA2|CAV1|TNFRSF1B|OSMR|MAPK8IP3|COL3A1|FABP4|FAM175A|RARA|MDM2|PDCD4|PTPLAD1|ANXA2P2|SIK2|CFB|BCAR1|CD44|HBEGF
51271	0.00019682	0.0093426	12	58	514	8227	negative regulation of cellular component movement	CD63|CLIC4|ANGPT2|TEP1|CITED2|ABHD2|ACTN1|CHRD|HMOX1|THY1|VASH1|ACTN4
51093	0.00022496	0.010503	23	165	514	8227	negative regulation of developmental process	ABCA1|SPEN|NRP1|ECM1|ANGPT2|RBM15|ABCA5|DYNLT1|FST|CAV1|CHRD|THY1|VASH1|RUNX1|CDK6|COL4A2|RUFY3|ARHGDIA|STAB1|COL4A3|RARA|TP53|TP63
42730	0.00024254	0.010793	3	3	514	8227	fibrinolysis	ANXA2|PLAU|ANXA2P2
51005	0.00024254	0.010793	3	3	514	8227	negative regulation of lipoprotein lipase activity	SORT1|ANGPTL2|ANGPTL4
60192	0.00024254	0.010793	3	3	514	8227	negative regulation of lipase activity	SORT1|ANGPTL2|ANGPTL4
65007	0.00026617	0.011663	307	4300	514	8227	biological regulation	ITSN2|CYFIP1|SPARC|CERK|HNRNPU|ENO1|BACH2|ELK3|GJA1|ZMIZ1|MYC|CREB3L2|KDR|PDK4|PLCE1|CYP1B1|LGALS9|TP63|SOX4|CPT1A|IL1R1|ACTN1|DAPK3|SLC11A2|FNDC3B|RFX3|EBF2|ACTN4|MAPK8IP3|SYTL2|RUNX1|TIAM2|POR|CCDC80|TEP1|RUFY3|KCNQ4|SIK1|SIK2|TP53|CFB|ZNF274|SDC4|RRAD|THY1|IQGAP1|UBE2J1|C3|INPP5B|HMOX1|A2M|PPARGC1A|PPARGC1B|S100A10|ABCA1|EGR1|ABCA5|GADD45A|EIF2AK3|GNG11|FLI1|DCLK1|COL1A1|ZBTB9|COL1A2|FUBP1|CCD…
48518	0.00027965	0.012068	120	1437	514	8227	positive regulation of biological process	CSF1|PVR|ETS2|CDC14B|GJA1|ZMIZ1|MYC|ARHGDIA|CREB3L2|C1RL|KDR|LGALS9|PHLDA1|IL6R|TP63|SOX4|MAP2K3|CPT1A|FST|DAPK3|FNDC3B|RFX3|EBF2|ACTN4|SYTL2|RUNX1|TIAM2|CCDC80|TEP1|COL4A3|TP53|CFB|DDX5|SDC4|CHRD|THY1|C3|HMOX1|TNFRSF14|PPARGC1A|PPARGC1B|CD276|ABCA1|EGR1|TGFB2|VCAM1|RBPMS|CAV1|EIF2AK3|HPS4|TNFRSF10B|CDK6|BMP1|NR4A3|BCL3|FAM175A|MDM2|PLXNB2|MAP3K14|NRP1|COL18A1|CDKN1A|ECM1|CITED2|CHD7|PRKAG2|LAMC1…
2526	0.00029854	0.012617	10	44	514	8227	acute inflammatory response	C3|ITIH4|VCAM1|C1S|C1R|STAT3|C1RL|A2M|IL6R|CFB
7584	0.00030124	0.012617	16	97	514	8227	response to nutrient	ARSA|VCAM1|CAV1|IGFBP2|TULP4|ACSL3|COL1A1|TEP1|UCP3|RARA|HMOX1|TRIM25|IGFBP7|A2M|OGT|CD44
23046	0.00031312	0.012739	102	1186	514	8227	signaling process	DGKD|PLXND1|NAB2|TNC|ELK3|CDC14B|PLAU|ARHGDIA|PDK4|PLCE1|MAP3K8|IL6R|PDE8A|MAP2K3|PPP1R16B|IGFBP4|IL1R1|DAPK3|IGFBP2|DGKZ|MAPK8IP3|TIAM2|SIK1|SIK2|TP53|CHRNA1|RRAD|ARHGAP17|IQGAP1|CORO1C|RHOBTB2|C3|INPP5B|SDCBP|HMOX1|SOCS6|S100A10|MARK1|ABCA1|CAV1|EIF2AK3|TNFRSF10B|ARHGAP27|GNG11|NFKB2|COL1A2|RHEB|BCL3|FAM175A|PLXNB2|OGT|NRP1|GPSM2|CDKN1A|MCTP1|ARHGAP1|PRKAG2|PIK3CB|RND3|YWHAQ|NCS1|ANKRD1|KIF13B|…
23060	0.00031312	0.012739	102	1186	514	8227	signal transmission	DGKD|PLXND1|NAB2|TNC|ELK3|CDC14B|PLAU|ARHGDIA|PDK4|PLCE1|MAP3K8|IL6R|PDE8A|MAP2K3|PPP1R16B|IGFBP4|IL1R1|DAPK3|IGFBP2|DGKZ|MAPK8IP3|TIAM2|SIK1|SIK2|TP53|CHRNA1|RRAD|ARHGAP17|IQGAP1|CORO1C|RHOBTB2|C3|INPP5B|SDCBP|HMOX1|SOCS6|S100A10|MARK1|ABCA1|CAV1|EIF2AK3|TNFRSF10B|ARHGAP27|GNG11|NFKB2|COL1A2|RHEB|BCL3|FAM175A|PLXNB2|OGT|NRP1|GPSM2|CDKN1A|MCTP1|ARHGAP1|PRKAG2|PIK3CB|RND3|YWHAQ|NCS1|ANKRD1|KIF13B|…
42221	0.00031966	0.012823	80	883	514	8227	response to chemical stimulus	COL18A1|CDKN1A|CLIC4|DGKD|SRXN1|CITED2|TNC|PLOD3|PIK3CB|CYR61|ERO1L|PANX1|GJA1|PLAU|MYC|CREB3L2|CYP1B1|TRIM25|ACP2|IL6R|ARSA|CPT1A|TPM4|GPX3|IL1R1|IGFBP2|ITGA1|SLC11A2|VASH1|ACTN4|ACSL3|OSMR|ETV5|TGFBR2|MMP14|LOX|TEP1|PXDN|COL4A3|RARA|ANGPTL2|ANGPTL4|TP53|CES2|CD44|C1S|MVP|ADCY4|ECSCR|TULP4|ATP1A1|TYMP|UCP3|SERPINH1|HMOX1|IGFBP7|STX3|A2M|SOCS7|PPARGC1B|IL12RB2|EGR1|PRNP|TGFB2|ANGPT2|VCAM1|SORT1|C…
45765	0.00035118	0.013891	11	53	514	8227	regulation of angiogenesis	C3|ECM1|ANGPT2|COL4A2|STAB1|COL4A3|HMOX1|ANGPTL2|ANGPTL4|VASH1|RUNX1
2520	0.00038163	0.014889	23	171	514	8227	immune system development	SPEN|EGR1|TGFB2|VCAM1|RBM15|CSF1|FST|SLC11A2|CHD7|NFKB2|RUNX1|RELB|TGFBR2|MYO1E|MECOM|IFI16|BCL3|KDR|MYH9|TIMP1|SH2B3|TP53|SOX4
9605	0.00044492	0.017124	31	263	514	8227	response to external stimulus	CDKN1A|ECSCR|TULP4|PIK3CB|CYR61|TYMP|PLAU|UCP3|HMOX1|TRIM25|IGFBP7|A2M|PPARGC1A|IL6R|ARSA|TGFB2|ANGPT2|VCAM1|CAV1|IGFBP2|ITGA1|ACSL3|COL1A1|MMP14|NR4A3|TEP1|RARA|PLP2|OGT|TP53|CD44
9966	0.00046456	0.017641	52	522	514	8227	regulation of signal transduction	ITSN2|ECM1|CSF1|TNFAIP3|PIK3CB|GJA1|MECOM|PLAU|PSD3|PLCE1|LGALS9|MCF2L2|IL6R|PLEKHG2|ARHGEF12|RALGAPA1|ITGA1|DUSP8|DGKZ|MAPK8IP3|TIAM2|CNKSR2|AGAP6|TEP1|TRAF5|PTPLAD1|ARHGEF2|CD44|HBEGF|AGPAT9|ASAP1|IQGAP1|SLC7A1|NRAS|FGD5|HMOX1|FLNA|RICTOR|SOCS6|SOCS7|MAP3K2|TGFB2|CAV1|EIF2AK3|TNFRSF10B|ARHGAP27|NEDD4|SGSM2|PDCD4|TRIM38|TEK|MAP3K14
40012	0.00048415	0.017941	22	163	514	8227	regulation of locomotion	SPAG9|COL18A1|CD63|LAMA5|CLIC4|ROBO4|TGFB2|ANGPT2|CSF1|CITED2|ABHD2|LAMA4|CHRD|THY1|VASH1|TEP1|PLAU|KDR|HMOX1|IL6R|BCAR1|HBEGF
30330	0.00048505	0.017941	7	24	514	8227	DNA damage response, signal transduction by p53 class mediator	CDKN1A|TFAP4|IFI16|BCL3|USP28|TP53|TP63
7398	0.00049441	0.018052	14	82	514	8227	ectoderm development	EDARADD|LAMA5|CLIC4|TGFB2|ANXA1|FST|COL1A1|COL3A1|ADAMTS2|COL1A2|COL5A1|COL5A3|COL5A2|TP63
7160	0.00051449	0.018548	12	64	514	8227	cell-matrix adhesion	SNED1|LAMA5|COL3A1|ADAM15|ITGA3|ACTN1|COL5A3|ITGA1|TRPM7|THY1|NID2|CD44
23051	0.00053223	0.018947	52	525	514	8227	regulation of signaling process	ITSN2|ECM1|CSF1|TNFAIP3|PIK3CB|GJA1|MECOM|PLAU|PSD3|PLCE1|LGALS9|MCF2L2|IL6R|PLEKHG2|ARHGEF12|RALGAPA1|ITGA1|DUSP8|DGKZ|MAPK8IP3|TIAM2|CNKSR2|AGAP6|TEP1|TRAF5|PTPLAD1|ARHGEF2|CD44|HBEGF|AGPAT9|ASAP1|IQGAP1|SLC7A1|NRAS|FGD5|HMOX1|FLNA|RICTOR|SOCS6|SOCS7|MAP3K2|TGFB2|CAV1|EIF2AK3|TNFRSF10B|ARHGAP27|NEDD4|SGSM2|PDCD4|TRIM38|TEK|MAP3K14
10646	0.00055869	0.019644	67	723	514	8227	regulation of cell communication	ITSN2|ECM1|CSF1|CITED2|CHD7|TNFAIP3|PIK3CB|GJA1|CYP26B1|MECOM|PLAU|PSD3|PLCE1|LGALS9|MCF2L2|IL6R|TP63|SOX4|CPT1A|PLEKHG2|ARHGEF12|RALGAPA1|FST|ITGA1|RFX3|DUSP8|DGKZ|MAPK8IP3|TIAM2|CNKSR2|AGAP6|TEP1|TRAF5|KCNQ4|PTPLAD1|ARHGEF2|TP53|CD44|HBEGF|AGPAT9|CHRD|ASAP1|THY1|IQGAP1|SLC7A1|NRAS|FGD5|HMOX1|FLNA|RICTOR|SOCS6|SOCS7|MAP3K2|EGR1|TGFB2|RBPMS|CAV1|EIF2AK3|TNFRSF10B|ARHGAP27|NEDD4|SGSM2|MDM2|PDCD4|T…
50789	0.00057107	0.019834	293	4111	514	8227	regulation of biological process	ITSN2|CYFIP1|SPARC|CERK|HNRNPU|ENO1|BACH2|ELK3|GJA1|ZMIZ1|MYC|CREB3L2|KDR|PDK4|PLCE1|LGALS9|TP63|SOX4|CPT1A|IL1R1|ACTN1|DAPK3|SLC11A2|FNDC3B|RFX3|EBF2|ACTN4|MAPK8IP3|SYTL2|RUNX1|TIAM2|CCDC80|TEP1|RUFY3|KCNQ4|SIK1|SIK2|TP53|CFB|ZNF274|SDC4|RRAD|THY1|IQGAP1|UBE2J1|C3|INPP5B|HMOX1|A2M|PPARGC1A|PPARGC1B|S100A10|ABCA1|EGR1|ABCA5|GADD45A|EIF2AK3|GNG11|FLI1|COL1A1|ZBTB9|COL1A2|FUBP1|CCDC88C|FXYD5|NRP1|C…
30097	0.0005963	0.020461	20	144	514	8227	hemopoiesis	EGR1|TGFB2|VCAM1|CSF1|FST|SLC11A2|CHD7|RUNX1|RELB|TGFBR2|MYO1E|MECOM|IFI16|BCL3|KDR|MYH9|TIMP1|SH2B3|TP53|SOX4
31960	0.00067743	0.022764	11	57	514	8227	response to corticosteroid stimulus	COL1A1|CDKN1A|FABP4|GPX3|UCP3|CAV1|IGFBP2|IGFBP7|A2M|IL6R|PPARGC1B
6950	0.00067942	0.022764	90	1043	514	8227	response to stress	NRP1|COL18A1|CDKN1A|SRXN1|CITED2|TNC|SMC5|PIK3CB|ELK3|ERO1L|CDC14B|GJA1|PLAU|CREB3L2|STAB1|C1RL|ANKRD1|TRIM25|IL6R|POLE|TP63|CD97|ANXA1|TPM4|VWF|ESCO1|IGFBP4|GPX3|IL1R1|MYOF|IGFBP2|SLC11A2|ACTN4|TMEM173|DGKZ|MAPK8IP3|ETV5|MMP14|SFPQ|VCAN|LOX|PXDN|PLSCR4|CRY1|ANGPTL2|LUC7L3|PTPLAD1|ANGPTL4|SGK1|TP53|CFB|CD44|ITIH4|C1S|C1R|ABHD2|C3|SNN|IFI16|UCP3|UBR5|SERPINH1|HMOX1|IGFBP7|S1PR3|STX3|SOCS6|A2M|PPAR…
42771	0.00078922	0.026136	5	13	514	8227	DNA damage response, signal transduction by p53 class mediator resulting in induction of apoptosis	IFI16|BCL3|USP28|TP53|TP63
2682	0.0008047	0.026342	26	214	514	8227	regulation of immune system process	CDKN1A|CSF1|C1S|C1R|THY1|PVR|C3|C1RL|HMOX1|TNFRSF14|A2M|IL6R|CD276|SPEN|TGFB2|VCAM1|RBM15|CAV1|RUNX1|TGFBR2|COL3A1|CDK6|RARA|CFB|BCAR1|CD44
48519	0.00088309	0.02858	111	1349	514	8227	negative regulation of biological process	ENO1|ELK3|CDH5|NRBP2|GJA1|SESN3|PLAU|MYC|ARHGDIA|TMSB10|IL6R|TP63|SOX4|FST|ACTN1|ARID5A|RFX3|VASH1|ACTN4|DGKZ|RUNX1|COL4A2|TEP1|RUFY3|COL4A3|KCNQ4|SIK1|TP53|RRAD|ABHD2|CHRD|THY1|HMOX1|TNFRSF14|IGFBP7|SOCS6|A2M|SOCS7|CD276|ABCA1|EGR1|PRNP|TGFB2|ABCA5|GADD45A|CAV1|EIF2AK3|COL1A1|DAB2|CDK6|BCL3|MDM2|FXYD5|ANXA2P2|CREBZF|NRP1|COL18A1|CDKN1A|CLIC4|ECM1|CITED2|TNFAIP3|BBC3|PTPRG|CYP26B1|MECOM|YWHAQ|TMS…
6811	0.00092456	0.028948	36	335	514	8227	ion transport	SLC25A1|CHRNA1|CLIC4|SLC3A2|ATP1A1|SAT1|ELK3|PANX1|CHRND|UCP3|SLC17A5|SLC38A7|TRPM7|KCNN3|CLIC1|ABCC4|ATP13A1|CAV1|SLC11A2|SLC39A10|ATP11B|ATP1B3|ATP2B1|SLC5A6|CLCN7|CLCN6|POR|CLCN5|TCN2|CACHD1|KCNQ4|FXYD5|PLP2|ATP13A3|SGK1|FTL
31018	0.00092495	0.028948	3	4	514	8227	endocrine pancreas development	EIF2AK3|RFX3|IL6R
43589	0.00092495	0.028948	3	4	514	8227	skin morphogenesis	COL1A1|COL1A2|TP63
42476	0.00093872	0.02906	8	34	514	8227	odontogenesis	COL1A1|EDARADD|LAMA5|TGFB2|COL1A2|CSF1|FST|TP63
7169	0.00098727	0.030234	19	139	514	8227	transmembrane receptor protein tyrosine kinase signaling pathway	CAST|DGKD|ANGPT2|SORT1|STAT3|ZFAND5|EIF2AK3|CBL|PTPRG|MYO1E|TEP1|KDR|PLCE1|FLNA|TEK|TKT|SOCS7|BCAR1|HBEGF
10811	0.0010528	0.031676	6	20	514	8227	positive regulation of cell-substrate adhesion	CDK6|CCDC80|CSF1|SDC4|KDR|CYR61
1952	0.0010566	0.031676	7	27	514	8227	regulation of cell-matrix adhesion	MMP14|CDK6|CSF1|SDC4|TEP1|KDR|PIK3CB
51094	0.0013052	0.038721	24	198	514	8227	positive regulation of developmental process	NRP1|ECM1|TGFB2|ANGPT2|CSF1|TNFRSF12A|FST|FNDC3B|HPS4|RUNX1|TGFBR2|C3|GJA1|BMP1|MYC|ARHGDIA|SH3PXD2B|RARA|ANGPTL2|PLXNB2|BAX|ANGPTL4|IL6R|CD276
48536	0.0014739	0.042993	4	9	514	8227	spleen development	SPEN|RBM15|BCL3|NFKB2
7167	0.0014794	0.042993	26	223	514	8227	enzyme linked receptor protein signaling pathway	DGKD|ZFAND5|CHRD|CBL|FSTL1|PTPRG|KDR|PLCE1|FLNA|SOCS7|CAST|TGFB2|ANGPT2|SORT1|FST|STAT3|EIF2AK3|TGFBR2|MYO1E|COL3A1|COL1A2|TEP1|TEK|TKT|BCAR1|HBEGF
30336	0.0016397	0.045865	10	54	514	8227	negative regulation of cell migration	CD63|CLIC4|ANGPT2|TEP1|CITED2|ABHD2|CHRD|HMOX1|THY1|VASH1
51384	0.0016397	0.045865	10	54	514	8227	response to glucocorticoid stimulus	CDKN1A|FABP4|GPX3|UCP3|CAV1|IGFBP2|IGFBP7|A2M|IL6R|PPARGC1B
45682	0.0016587	0.045865	5	15	514	8227	regulation of epidermis development	TGFB2|FST|NAB2|MAFF|TP63
1569	0.0016587	0.045865	5	15	514	8227	patterning of blood vessels	SPEN|NRP1|RBM15|PLXND1|TGFBR2
2455	0.0016587	0.045865	5	15	514	8227	humoral immune response mediated by circulating immunoglobulin	C3|C1S|C1R|BCL3|C1RL
45859	0.0017151	0.046967	28	249	514	8227	regulation of protein kinase activity	CDKN1A|DGKD|CSF1|CERK|SDC4|ADCY4|PRKAG2|THY1|PIK3CB|SH3BP5|PLCE1|MAP2K3|MAP3K2|TGFB2|GADD45A|CAV1|ITGA1|TNFRSF10B|DUSP8|DGKZ|MAPK8IP3|TGFBR2|FABP4|TFAP4|TEP1|PPAP2A|PDCD4|PTPLAD1
Down-regulated in elderly muscle 5 h post-CON exercise:
45333	8.8834e-17	1.7003e-13	23	83	243	8227	cellular respiration	NDUFA9|MDH1|NDUFB10|NDUFA5|NDUFA10|NDUFB3|NFATC3|NDUFC1|UQCR10|SDHA|SDHB|ALDH5A1|NDUFS8|SUCLA2|NDUFS7|NNT|NDUFS4|NDUFS2|NDUFS1|UQCRC2|ACO2|DLD|COX10
6091	1.0195e-14	9.7571e-12	35	253	243	8227	generation of precursor metabolites and energy	NDUFB10|FECH|ATP5A1|NDUFA10|NDUFB3|ETFDH|ATP5C1|ATP5J|UQCR10|ETFB|ATP5G1|DHTKD1|LDHB|ATP5B|NNT|COX10|NDUFA9|MDH1|NDUFA5|ECH1|NFATC3|NDUFC1|SDHA|SDHB|ALDH5A1|NDUFS8|SUCLA2|NDUFS7|NDUFS4|NDUFS2|NDUFS1|UQCRC2|ACO2|DLD|SLC25A4
22904	1.9926e-13	1.2713e-10	17	56	243	8227	respiratory electron transport chain	NDUFA9|NDUFB10|NDUFA5|NDUFA10|NDUFB3|NDUFC1|UQCR10|SDHA|SDHB|ALDH5A1|NDUFS8|NDUFS7|NDUFS4|NDUFS2|NDUFS1|DLD|COX10
6119	3.7825e-13	1.8099e-10	20	86	243	8227	oxidative phosphorylation	NDUFA9|NDUFB10|NDUFA5|ATP5A1|NDUFA10|NDUFB3|ATP5C1|ATP5J|NDUFC1|UQCR10|ATP5G1|ATP5B|NDUFS8|NDUFS7|NDUFS4|NDUFS2|NDUFS1|UQCRC2|DLD|COX10
15980	5.95e-13	2.2776e-10	23	121	243	8227	energy derivation by oxidation of organic compounds	NDUFA9|MDH1|NDUFB10|NDUFA5|NDUFA10|NDUFB3|NFATC3|NDUFC1|UQCR10|SDHA|SDHB|ALDH5A1|NDUFS8|SUCLA2|NDUFS7|NNT|NDUFS4|NDUFS2|NDUFS1|UQCRC2|ACO2|DLD|COX10
22900	5.1591e-12	1.6458e-09	20	98	243	8227	electron transport chain	NDUFA9|NDUFB10|NDUFA5|NDUFA10|NDUFB3|ETFDH|NDUFC1|UQCR10|ETFB|SDHA|SDHB|ALDH5A1|NDUFS8|NDUFS7|NDUFS4|NDUFS2|NDUFS1|UQCRC2|DLD|COX10
55114	1.0988e-11	3.0045e-09	42	445	243	8227	oxidation reduction	MAOB|NDUFB10|NDUFA10|NDUFB3|ETFDH|CPOX|UQCR10|ETFB|ALKBH8|DHTKD1|LDHB|PRDX2|DBP|NNT|PNPO|ACADM|COX10|DECR1|ACAD8|NDUFA9|MDH1|NDUFA5|DCXR|CYP4B1|NDUFC1|SDHA|SDHB|COQ6|ALDH4A1|ALDH6A1|ALDH5A1|NDUFS8|BDH1|NDUFS7|ZADH2|NDUFS4|ALDH1A1|NDUFS2|NDUFS1|UQCRC2|GPD1L|DLD
42773	5.2266e-11	1.1115e-08	14	48	243	8227	ATP synthesis coupled electron transport	NDUFA9|NDUFB10|NDUFA5|NDUFA10|NDUFB3|NDUFC1|UQCR10|NDUFS8|NDUFS7|NDUFS4|NDUFS2|NDUFS1|DLD|COX10
42775	5.2266e-11	1.1115e-08	14	48	243	8227	mitochondrial ATP synthesis coupled electron transport	NDUFA9|NDUFB10|NDUFA5|NDUFA10|NDUFB3|NDUFC1|UQCR10|NDUFS8|NDUFS7|NDUFS4|NDUFS2|NDUFS1|DLD|COX10
6120	3.2389e-10	6.1992e-08	12	37	243	8227	mitochondrial electron transport, NADH to ubiquinone	NDUFA9|NDUFS8|NDUFB10|NDUFS7|NDUFA5|NDUFA10|NDUFS4|NDUFB3|NDUFS2|NDUFC1|NDUFS1|DLD
9060	2.2612e-06	0.00039345	8	31	243	8227	aerobic respiration	SUCLA2|MDH1|NNT|UQCRC2|ACO2|SDHA|SDHB|COX10
51186	3.4662e-06	0.00055285	17	157	243	8227	cofactor metabolic process	MDH1|FECH|DCXR|MCCC1|CPOX|SDHA|SDHB|COQ6|COQ5|LDHB|ALDH5A1|SUCLA2|NNT|ACO2|ACSS1|DLD|COX10
44282	4.7534e-06	0.00069984	18	178	243	8227	small molecule catabolic process	ACAD8|ACHE|MDH1|ECH1|MCCC1|ETFDH|DHTKD1|ALDH4A1|LDHB|ALDH6A1|ALDH5A1|DBP|CPT2|PDE4A|ACADM|GPD1L|DECR1|BCAT2
6084	5.4867e-06	0.0007501	7	25	243	8227	acetyl-CoA metabolic process	SUCLA2|MDH1|NNT|ACO2|SDHA|ACSS1|SDHB
43648	1.2527e-05	0.0015985	7	28	243	8227	dicarboxylic acid metabolic process	ALDH5A1|SUCLA2|MDH1|GPT2|SDHA|DLD|SDHB
42180	1.5596e-05	0.0018657	27	376	243	8227	cellular ketone metabolic process	ETFDH|ADIPOR2|LDHB|SGPL1|DBP|CPT2|ACADM|DECR1|ACAD8|ARG2|MDH1|GPT2|ECH1|MCCC1|THNSL1|SDHA|SDHB|COQ6|COQ5|ALDH4A1|ALDH6A1|ALDH5A1|SUCLA2|ACO2|PPARA|DLD|BCAT2
46395	2.0608e-05	0.0021913	11	80	243	8227	carboxylic acid catabolic process	ACAD8|ALDH4A1|ALDH6A1|DBP|CPT2|ECH1|MCCC1|ETFDH|ACADM|DECR1|BCAT2
16054	2.0608e-05	0.0021913	11	80	243	8227	organic acid catabolic process	ACAD8|ALDH4A1|ALDH6A1|DBP|CPT2|ECH1|MCCC1|ETFDH|ACADM|DECR1|BCAT2
46356	2.3334e-05	0.002233	6	21	243	8227	acetyl-CoA catabolic process	SUCLA2|MDH1|NNT|ACO2|SDHA|SDHB
6099	2.3334e-05	0.002233	6	21	243	8227	tricarboxylic acid cycle	SUCLA2|MDH1|NNT|ACO2|SDHA|SDHB
6082	2.8612e-05	0.002513	26	367	243	8227	organic acid metabolic process	ETFDH|ADIPOR2|LDHB|SGPL1|DBP|CPT2|ACADM|DECR1|ACAD8|ARG2|MDH1|GPT2|ECH1|MCCC1|THNSL1|SDHA|SDHB|ALDH4A1|ALDH6A1|ALDH5A1|SUCLA2|TST|ACO2|PPARA|DLD|BCAT2
6732	2.8886e-05	0.002513	13	114	243	8227	coenzyme metabolic process	MDH1|DCXR|SDHA|SDHB|COQ6|COQ5|LDHB|ALDH5A1|SUCLA2|NNT|ACO2|ACSS1|DLD
9109	3.1296e-05	0.0026044	6	22	243	8227	coenzyme catabolic process	SUCLA2|MDH1|NNT|ACO2|SDHA|SDHB
6105	4.7346e-05	0.0034373	4	8	243	8227	succinate metabolic process	ALDH5A1|SUCLA2|SDHA|SDHB
34440	4.8917e-05	0.0034373	7	34	243	8227	lipid oxidation	DBP|CPT2|ECH1|ETFDH|ACADM|ADIPOR2|DECR1
19395	4.8917e-05	0.0034373	7	34	243	8227	fatty acid oxidation	DBP|CPT2|ECH1|ETFDH|ACADM|ADIPOR2|DECR1
6793	5.0285e-05	0.0034373	38	663	243	8227	phosphorus metabolic process	RET|MTMR3|NDUFB10|ATP5A1|NDUFA10|NDUFB3|TESK2|ATP5C1|ATP5J|UQCR10|ATP5G1|ATP5B|PRDX2|EPHB1|COX10|MAP2K6|NDUFA9|CDK18|NDUFA5|DUSP28|NDUFC1|ACVR2B|GADD45G|DUSP7|SMAD7|PDP1|NDUFS8|SBK1|NDUFS7|NDUFS4|NDUFS2|PRKCQ|NDUFS1|UQCRC2|ALPK2|GPD1L|PTPN4|DLD
6796	5.0285e-05	0.0034373	38	663	243	8227	phosphate metabolic process	RET|MTMR3|NDUFB10|ATP5A1|NDUFA10|NDUFB3|TESK2|ATP5C1|ATP5J|UQCR10|ATP5G1|ATP5B|PRDX2|EPHB1|COX10|MAP2K6|NDUFA9|CDK18|NDUFA5|DUSP28|NDUFC1|ACVR2B|GADD45G|DUSP7|SMAD7|PDP1|NDUFS8|SBK1|NDUFS7|NDUFS4|NDUFS2|PRKCQ|NDUFS1|UQCRC2|ALPK2|GPD1L|PTPN4|DLD
43436	6.5406e-05	0.0041729	25	363	243	8227	oxoacid metabolic process	ETFDH|ADIPOR2|LDHB|SGPL1|DBP|CPT2|ACADM|DECR1|ACAD8|ARG2|MDH1|GPT2|ECH1|MCCC1|THNSL1|SDHA|SDHB|ALDH4A1|ALDH6A1|ALDH5A1|SUCLA2|ACO2|PPARA|DLD|BCAT2
19752	6.5406e-05	0.0041729	25	363	243	8227	carboxylic acid metabolic process	ETFDH|ADIPOR2|LDHB|SGPL1|DBP|CPT2|ACADM|DECR1|ACAD8|ARG2|MDH1|GPT2|ECH1|MCCC1|THNSL1|SDHA|SDHB|ALDH4A1|ALDH6A1|ALDH5A1|SUCLA2|ACO2|PPARA|DLD|BCAT2
51187	8.7442e-05	0.0053988	6	26	243	8227	cofactor catabolic process	SUCLA2|MDH1|NNT|ACO2|SDHA|SDHB
16310	0.00011783	0.0070478	32	541	243	8227	phosphorylation	RET|NDUFB10|ATP5A1|NDUFA10|NDUFB3|TESK2|ATP5C1|ATP5J|UQCR10|ATP5G1|ATP5B|PRDX2|EPHB1|COX10|MAP2K6|NDUFA9|CDK18|NDUFA5|NDUFC1|ACVR2B|GADD45G|SMAD7|NDUFS8|SBK1|NDUFS7|NDUFS4|NDUFS2|PRKCQ|NDUFS1|UQCRC2|ALPK2|DLD
44281	0.00014813	0.0085918	47	933	243	8227	small molecule metabolic process	ACHE|BTG2|PFKFB4|HLF|ATP5A1|ETFDH|ATP5C1|ATP5J|ADIPOR2|ATP5G1|ALKBH8|DHTKD1|ADAL|LDHB|ATP5B|SGPL1|DBP|CPT2|CA4|PNPO|PDE4A|ACADM|DECR1|ACAD8|ARG2|MDH1|GPT2|DCXR|ECH1|MCCC1|THNSL1|SDHA|SDHB|COQ6|COQ5|ALDH4A1|ALDH6A1|ALDH5A1|SUCLA2|TST|NDUFS1|GALM|ACO2|GPD1L|PPARA|DLD|BCAT2
6635	0.00016749	0.0094286	6	29	243	8227	fatty acid beta-oxidation	DBP|CPT2|ECH1|ETFDH|ACADM|DECR1
46483	0.00018548	0.010143	18	234	243	8227	heterocycle metabolic process	FECH|MCCC1|ATP5A1|ATP5C1|ATP5J|CPOX|ATP5G1|ALDH4A1|ADAL|ATP5B|ALDH6A1|SUCLA2|PNPO|PDE4A|NDUFS1|PCBD2|DLD|COX10
45638	0.00029788	0.015356	5	21	243	8227	negative regulation of myeloid cell differentiation	NFKBIA|ZFP36|MAFB|LDB1|TOB2
9083	0.00030488	0.015356	4	12	243	8227	branched chain family amino acid catabolic process	ACAD8|ALDH6A1|MCCC1|BCAT2
42776	0.00030488	0.015356	4	12	243	8227	mitochondrial ATP synthesis coupled proton transport	ATP5B|ATP5A1|ATP5C1|ATP5J
43433	0.00041235	0.019731	7	47	243	8227	negative regulation of transcription factor activity	NFKBIA|PRDX2|THRA|ID1|CEBPG|TRIB1|SMAD7
90048	0.00041235	0.019731	7	47	243	8227	negative regulation of transcription regulator activity	NFKBIA|PRDX2|THRA|ID1|CEBPG|TRIB1|SMAD7
48511	0.0005497	0.025662	9	80	243	8227	rhythmic process	PER1|PER3|DBP|HLF|MSTN|ANGPT1|TEF|NR1D1|FOXO3
48513	0.00060015	0.027038	48	1019	243	8227	organ development	RET|ACHE|CEBPB|HLF|MSTN|LDB1|THRA|CEBPG|SIX1|MYL6B|FOXO3|PMF1|ADIPOR2|NTF4|SLC9A3R2|ATP5B|PRDX2|SGPL1|NPHP1|CA4|MFN2|CHRNA10|SMYD1|ANKRD2|DGCR6|PITX2|EPHB1|SKIL|PITX3|TLE1|PTCD2|ANGPT1|NFATC3|TFEB|ACVR2B|SMAD7|MAFB|SBK1|ENAM|MYL2|ID1|NDUFS4|CASQ2|TCAP|PRKCQ|PPARA|VAMP5|BCAT2
45637	0.00060743	0.027038	7	50	243	8227	regulation of myeloid cell differentiation	NFKBIA|ZFP36|MAFB|LDB1|FOXO3|TOB2|PMF1
9062	0.00067266	0.029261	6	37	243	8227	fatty acid catabolic process	DBP|CPT2|ECH1|ETFDH|ACADM|DECR1
43392	0.00097435	0.041442	7	54	243	8227	negative regulation of DNA binding	NFKBIA|PRDX2|THRA|ID1|CEBPG|TRIB1|SMAD7
9081	0.0010211	0.042488	4	16	243	8227	branched chain family amino acid metabolic process	ACAD8|ALDH6A1|MCCC1|BCAT2
9887	0.0012125	0.049379	22	367	243	8227	organ morphogenesis	RET|TLE1|PTCD2|THRA|ANGPT1|SIX1|PMF1|ACVR2B|SMAD7|NTF4|SGPL1|MAFB|ENAM|MYL2|ID1|MFN2|CHRNA10|TCAP|DGCR6|PITX2|EPHB1|PITX3

## Sheet: Older post-ECC (BP)
GO-ID	P-raw	P-corrected	Observed DE genes	Total genes in GO-ID	Total DE genes in GO analysis	Total genes in GO	GO description	Genes in test set
Up-regulated in older muscle 5 h post-ECC exercise:
48646	2.5872e-10	8.1651e-07	49	257	575	7879	anatomical structure formation involved in morphogenesis	ATF1|NRP1|ROBO4|CITED2|ADM|SHB|CYR61|ADAMTS1|PLAU|ZC3H12A|KDR|JUNB|TP63|NKX3-1|RBM15|ANXA2|TNFRSF12A|IL18|ALDH1A3|COL4A1|MYH9|MFGE8|TP53|CD44|THBS1|TYMP|BCL2L11|XIRP1|HMOX1|EGLN1|SPEN|SMAD1|TGFB2|JAG1|POU2F1|TBX3|MIB1|VEGFA|TJP1|KLF5|NR4A3|ACTC1|DLC1|MYF6|CSPG4|ANXA2P2|NAA15|BMPR1A|FGFR1
50794	6.2137e-10	9.8052e-07	344	3748	575	7879	regulation of cellular process	ATF1|ITSN2|CYFIP1|ERRFI1|HNRNPU|JMJD1C|GABPB1|BACH1|BACH2|ABRA|NUDT4|ICAM1|GJA1|ZMIZ1|MYC|RASSF5|KDR|PDK4|CCNL1|JUNB|TP63|SOX4|IER3|IL15RA|CPT1A|ACTN2|IL1R1|STARD8|ACTN1|DAPK3|FNDC3B|DNTTIP2|GTPBP4|RUNX1|EWSR1|KCNQ4|SIK1|SIK2|TP53|ATF3|PFN2|ZNF274|SDC4|RRAD|PDGFB|IQGAP1|ARPP19|ACTR3B|TP53BP2|HMOX1|PPARGC1A|ZNF146|PPARGC1B|SRPK2|EGR1|STARD13|JUND|JAG1|ABCA5|GADD45B|GADD45A|PLK2|EAF1|EIF2AK3|RASSF8…
48513	2.8471e-09	2.1351e-06	118	963	575	7879	organ development	ATF1|ERRFI1|CSF1|NAB1|ZFAND5|TNC|IRS2|GJA1|ZMIZ1|PLAU|MYC|PPAT|ZC3H12A|KDR|FAM65B|JUNB|PITX1|IL6R|TP63|SOX4|FST|ARID5B|LIG4|ACSL3|RUNX1|COL4A1|KCNQ4|ALPK3|TP53|PDGFB|ZFP36L1|UGCG|BCL2L11|HMOX1|EGR1|SMAD1|TGFB2|JAG1|POU2F1|HSPA5|EIF2AK3|SYNJ2|HOOK3|GNG12|QKI|BMP6|NFKB2|RCAN1|NR4A3|COL5A3|BCL3|MYF6|CSPG4|ANXA2P2|BMPR1A|FGFR1|NRP1|CSRNP1|CDKN1A|CLIC4|ROBO4|CITED2|ELN|ADM|LAMC1|SHB|CYR61|CSRP3|SCML1|…
9653	3.2966e-09	2.1351e-06	93	699	575	7879	anatomical structure morphogenesis	ATF1|CYFIP1|ERRFI1|NRP1|CSRNP1|CDKN1A|ROBO4|CSF1|CITED2|ELN|NAB1|ZFAND5|TNC|ADM|LAMC1|SHB|CYR61|GJA1|CSRP3|SCML1|HEY1|ZMIZ1|ADAMTS1|PLAU|MYC|PPAT|ZC3H12A|KDR|JAK2|JUNB|PITX1|BBS5|TP63|IER3|NKX3-1|EDARADD|RBM15|ANXA2|TNFRSF12A|ANXA3|FST|IL18|ARID5B|PTBP3|UGDH|ALDH1A3|COL4A1|KCNQ4|MYH9|ARHGEF2|MFGE8|CRYAB|TP53|CD44|CHST3|SATB2|PDGFB|THBS1|TYMP|ZFP36L1|BCL2L11|XIRP1|HMOX1|S1PR3|EGLN1|SPEN|SMAD1|TGFB…
1944	3.3827e-09	2.1351e-06	40	201	575	7879	vasculature development	ERRFI1|NRP1|ROBO4|CITED2|ZFAND5|SHB|THBS1|CYR61|TYMP|ZFP36L1|GJA1|CSRP3|ZMIZ1|PLAU|ZC3H12A|KDR|HMOX1|ITGAV|JUNB|SPEN|TGFB2|JAG1|RBM15|ANXA2|TNFRSF12A|IL18|QKI|TBX3|MIB1|VEGFA|MYO1E|KLF5|COL4A1|MYH9|CSPG4|ANXA2P2|NAA15|MFGE8|CD44|FGFR1
50789	4.6363e-09	2.2367e-06	354	3939	575	7879	regulation of biological process	ATF1|ITSN2|CYFIP1|ERRFI1|HNRNPU|JMJD1C|GABPB1|BACH1|BACH2|ABRA|NUDT4|ICAM1|GJA1|ZMIZ1|MYC|RASSF5|KDR|PDK4|CCNL1|JUNB|TP63|SOX4|IER3|IL15RA|CPT1A|ACTN2|IL1R1|STARD8|ACTN1|DAPK3|FNDC3B|DNTTIP2|GTPBP4|RUNX1|EWSR1|KCNQ4|SIK1|SIK2|TP53|ATF3|PFN2|ZNF274|SLC22A5|SDC4|RRAD|PDGFB|IQGAP1|ARPP19|ACTR3B|UBE2J1|TP53BP2|HMOX1|PPARGC1A|ZNF146|PPARGC1B|SRPK2|EGR1|STARD13|JUND|JAG1|ABCA5|GADD45B|GADD45A|PLK2|EAF1…
23052	4.961e-09	2.2367e-06	175	1625	575	7879	signaling	ATF1|GUCY1B3|DGKD|NAB1|FAM13A|ZFAND5|TNC|IRS2|BACH1|ERO1L|NUDT4|GJA1|PLAU|RASSF5|KDR|PDK4|MAP3K9|IL6R|TP63|SOX4|MAP2K3|PPP1R16B|TLE4|IL15RA|IL1R1|STARD8|FST|DAPK3|IGFBP2|ARID5B|SIK1|SIK2|TP53|XPR1|RRAD|PDGFB|ELTD1|ARHGAP17|IQGAP1|RASAL2|PLCXD1|SLC9A1|CORO1C|RAP1B|SDCBP|UBR5|TP53BP2|HMOX1|SOCS6|PPARGC1A|SOCS7|PPARGC1B|SRPK2|SMAD1|STARD13|TGFB2|JAG1|POU2F1|GADD45B|SMURF2|HSPA5|HOMER2|EIF2AK3|TNFRSF…
65007	9.7083e-09	3.8299e-06	365	4113	575	7879	biological regulation	ATF1|ITSN2|CYFIP1|ERRFI1|HNRNPU|JMJD1C|GABPB1|BACH1|BACH2|ABRA|NUDT4|ICAM1|GJA1|ZMIZ1|MYC|RASSF5|KDR|PDK4|CYP1B1|CCNL1|JUNB|TP63|SOX4|IER3|IL15RA|CPT1A|ACTN2|IL1R1|STARD8|ACTN1|DAPK3|FNDC3B|DNTTIP2|GTPBP4|RUNX1|EWSR1|KCNQ4|SIK1|SIK2|TP53|ATF3|PFN2|ZNF274|SEH1L|SLC22A5|SDC4|RRAD|PDGFB|IQGAP1|ARPP19|ACTR3B|UBE2J1|TP53BP2|HMOX1|PPARGC1A|ZNF146|PPARGC1B|SRPK2|EGR1|STARD13|JUND|JAG1|YES1|ABCA5|GADD45B…
48514	1.5285e-08	5.3599e-06	34	163	575	7879	blood vessel morphogenesis	NRP1|ROBO4|CITED2|SHB|THBS1|CYR61|TYMP|ZFP36L1|GJA1|CSRP3|ZMIZ1|PLAU|ZC3H12A|KDR|HMOX1|JUNB|SPEN|TGFB2|JAG1|RBM15|ANXA2|TNFRSF12A|IL18|QKI|VEGFA|MYO1E|KLF5|COL4A1|MYH9|CSPG4|ANXA2P2|NAA15|MFGE8|FGFR1
1568	1.7887e-08	5.6451e-06	38	196	575	7879	blood vessel development	NRP1|ROBO4|CITED2|SHB|THBS1|CYR61|TYMP|ZFP36L1|GJA1|CSRP3|ZMIZ1|PLAU|ZC3H12A|KDR|HMOX1|ITGAV|JUNB|SPEN|TGFB2|JAG1|RBM15|ANXA2|TNFRSF12A|IL18|QKI|TBX3|MIB1|VEGFA|MYO1E|KLF5|COL4A1|MYH9|CSPG4|ANXA2P2|NAA15|MFGE8|CD44|FGFR1
48518	4.2569e-08	1.2214e-05	150	1374	575	7879	positive regulation of biological process	ATF1|CSF1|IRS2|GABPB1|PVR|ABRA|ETS2|ICAM1|GJA1|ZMIZ1|MYC|PIM1|KDR|JUNB|PHLDA1|IL6R|TP63|SOX4|MAP2K3|CPT1A|FST|DAPK3|FNDC3B|LIG4|RUNX1|TP53|ATF3|DDX5|PSMD12|SLC22A5|SDC4|NOP2|PDGFB|ARPP19|SLC9A1|BCL2L11|TP53BP2|HMOX1|PPARGC1A|PPARGC1B|AKIRIN2|EGR1|SMAD1|TGFB2|JUND|JAG1|POU2F1|RBPMS|HSPA5|PLK2|EIF2AK3|TNFRSF10B|ESRRG|BMP6|NR4A3|CDK4|BCL3|MDM2|MYF6|MAP3K14|BMPR1A|PICALM|FGFR1|NRP1|CSRNP1|GSK3B|CDKN1…
32502	1.0231e-07	2.6908e-05	179	1739	575	7879	developmental process	ATF1|CYFIP1|ERRFI1|DGKD|CSF1|NAB1|WIPF3|ZFAND5|TNC|IRS2|ETS2|ERO1L|LOXL2|GJA1|ZMIZ1|PLAU|MYC|PPAT|ZC3H12A|PIM1|KDR|FAM65B|JUNB|PITX1|IL6R|TP63|SOX4|IER3|SEMA6B|SEMA6D|FST|DAPK3|IGFBP2|IFRD1|DYRK1A|ARID5B|LIG4|ACSL3|NPNT|RUNX1|KIAA1217|COL4A1|KCNQ4|ALPK3|SIK1|TP53|SDC4|PDGFB|SLC9A1|ZFP36L1|UGCG|BCL2L11|HMOX1|PPARGC1A|SOCS7|SRPK2|AKIRIN2|EGR1|SMAD1|PHC2|TGFB2|JUND|JAG1|POU2F1|GADD45B|HSPA5|EIF2AK3|…
1525	1.1999e-07	2.9131e-05	26	114	575	7879	angiogenesis	NRP1|ROBO4|SHB|THBS1|CYR61|TYMP|PLAU|ZC3H12A|KDR|HMOX1|SPEN|TGFB2|JAG1|RBM15|ANXA2|TNFRSF12A|IL18|VEGFA|KLF5|COL4A1|MYH9|CSPG4|ANXA2P2|NAA15|MFGE8|FGFR1
48522	2.0657e-07	4.6566e-05	139	1278	575	7879	positive regulation of cellular process	ATF1|CSF1|IRS2|GABPB1|ABRA|ETS2|ICAM1|GJA1|ZMIZ1|MYC|PIM1|KDR|JUNB|PHLDA1|IL6R|TP63|SOX4|MAP2K3|CPT1A|DAPK3|FNDC3B|LIG4|RUNX1|TP53|ATF3|DDX5|PSMD12|SDC4|NOP2|PDGFB|ARPP19|BCL2L11|TP53BP2|HMOX1|PPARGC1A|PPARGC1B|AKIRIN2|EGR1|SMAD1|TGFB2|JUND|JAG1|POU2F1|RBPMS|HSPA5|PLK2|EIF2AK3|TNFRSF10B|ESRRG|BMP6|NR4A3|CDK4|BCL3|MDM2|MYF6|MAP3K14|BMPR1A|PICALM|FGFR1|NRP1|CSRNP1|CDKN1A|CSRNP2|BTG1|CITED2|FHL2|PRK…
7275	8.812e-07	0.00017534	162	1584	575	7879	multicellular organismal development	ATF1|CYFIP1|ERRFI1|DGKD|CSF1|NAB1|WIPF3|ZFAND5|TNC|IRS2|ETS2|GJA1|ZMIZ1|PLAU|MYC|PPAT|ZC3H12A|PIM1|KDR|FAM65B|JUNB|PITX1|IL6R|TP63|SOX4|SEMA6B|SEMA6D|FST|DAPK3|IFRD1|DYRK1A|ARID5B|LIG4|ACSL3|NPNT|RUNX1|KIAA1217|COL4A1|KCNQ4|ALPK3|SIK1|TP53|SDC4|PDGFB|ZFP36L1|UGCG|BCL2L11|HMOX1|AKIRIN2|EGR1|SMAD1|PHC2|TGFB2|JUND|JAG1|POU2F1|GADD45B|HSPA5|EIF2AK3|CRIM1|SYNJ2|HOOK3|GNG12|QKI|BMP6|NFKB2|RCAN1|RNF103|…
42221	9.2415e-07	0.00017534	98	840	575	7879	response to chemical stimulus	ATF1|DGKD|TNC|IRS2|PLOD2|PRDM2|ERO1L|LIPE|GJA1|PLAU|MYC|PPAT|PIM1|CYP1B1|JUNB|IL6R|CPT1A|TPM4|IL1R1|IGFBP2|TRAFD1|ACSL3|TP53|SLC22A5|ABCB4|PDGFB|SLC9A1|HMOX1|SOCS7|PPARGC1B|AKIRIN2|EGR1|PRNP|SMAD1|TGFB2|HSPA5|EIF2AK3|GNG12|NCEH1|NR4A3|CDK4|GCLM|OGT|CDKN1A|CLIC4|BTG1|SRXN1|CITED2|HSPB7|FHL2|HSPB1|ADM|CYR61|PANX1|THBD|JAK2|ABCC1|ANXA3|IL18|FOS|OSMR|DUSP6|ETV5|ALDH1A3|PXDN|RARA|ANGPTL2|TOP1|MFGE8|CR…
23033	9.445e-07	0.00017534	125	1147	575	7879	signaling pathway	GUCY1B3|DGKD|ZFAND5|IRS2|BACH1|ERO1L|NUDT4|KDR|MAP3K9|IL6R|TP63|SOX4|TLE4|IL1R1|FST|DAPK3|ARID5B|SIK1|SIK2|TP53|XPR1|RRAD|PDGFB|ELTD1|PLCXD1|SLC9A1|RAP1B|SDCBP|UBR5|HMOX1|SOCS6|PPARGC1A|SOCS7|PPARGC1B|SRPK2|SMAD1|TGFB2|JAG1|GADD45B|SMURF2|HSPA5|HOMER2|EIF2AK3|TNFRSF10B|GNG12|BMP6|CYLD|BCL9|RCAN1|RHEB|DLG5|BCL3|STRN|PI4KB|BMPR1A|FGFR1|CSRNP1|GPSM2|GSK3B|CDKN1A|FHL2|PRKAG2|ADM|DUSP16|RND3|ARL5B|SPR…
48731	1.5308e-06	0.00025454	137	1298	575	7879	system development	ATF1|CYFIP1|ERRFI1|CSF1|NAB1|ZFAND5|TNC|IRS2|ETS2|GJA1|ZMIZ1|PLAU|MYC|PPAT|ZC3H12A|KDR|FAM65B|JUNB|PITX1|IL6R|TP63|SOX4|SEMA6B|SEMA6D|FST|DAPK3|DYRK1A|ARID5B|LIG4|ACSL3|RUNX1|KIAA1217|COL4A1|KCNQ4|ALPK3|TP53|PDGFB|ZFP36L1|UGCG|BCL2L11|HMOX1|EGR1|SMAD1|TGFB2|JUND|JAG1|POU2F1|HSPA5|EIF2AK3|CRIM1|SYNJ2|HOOK3|GNG12|QKI|BMP6|NFKB2|RCAN1|RNF103|NR4A3|COL5A3|BCL3|MYF6|STRN|CSPG4|MAFK|ANXA2P2|BMPR1A|FGFR…
48856	1.5437e-06	0.00025454	148	1429	575	7879	anatomical structure development	ATF1|CYFIP1|ERRFI1|CSF1|NAB1|ZFAND5|TNC|IRS2|ETS2|GJA1|ZMIZ1|PLAU|MYC|PPAT|ZC3H12A|KDR|FAM65B|JUNB|PITX1|IL6R|TP63|SOX4|IER3|SEMA6B|SEMA6D|FST|DAPK3|IFRD1|DYRK1A|ARID5B|LIG4|ACSL3|RUNX1|KIAA1217|COL4A1|KCNQ4|ALPK3|TP53|SDC4|PDGFB|ZFP36L1|UGCG|BCL2L11|HMOX1|EGR1|SMAD1|TGFB2|JUND|JAG1|POU2F1|HSPA5|EIF2AK3|CRIM1|SYNJ2|HOOK3|GNG12|QKI|BMP6|NFKB2|RCAN1|RNF103|NR4A3|COL5A3|BCL3|MYF6|STRN|CSPG4|MAFK|ANX…
51270	1.613e-06	0.00025454	30	162	575	7879	regulation of cellular component movement	NRP1|CLIC4|ROBO4|CSF1|CITED2|ABHD2|PDGFB|NEXN|IRS2|HDAC9|THBS1|ICAM1|PLAU|KDR|HMOX1|JAK2|IL6R|SPAG9|TGFB2|JAG1|ANGPT2|ANXA3|ACTN1|RRAS2|GTPBP4|VEGFA|DLC1|BCAR1|CHST3|HBEGF
32501	2.3811e-06	0.00035067	190	1954	575	7879	multicellular organismal process	ATF1|CYFIP1|ERRFI1|GUCY1B3|DGKD|CSF1|NAB1|WIPF3|ZFAND5|TNC|IRS2|ETS2|GJA1|ZMIZ1|PLAU|MYC|PPAT|ZC3H12A|PIM1|KDR|CYP1B1|FAM65B|JUNB|PITX1|IL6R|TP63|SOX4|SEMA6B|TPM4|ACTN2|IL1R1|SEMA6D|FST|DAPK3|IFRD1|DYRK1A|ARID5B|LIG4|ACSL3|NPNT|RUNX1|KIAA1217|COL4A1|KCNQ4|ALPK3|SIK1|TP53|SDC4|PDGFB|ZFP36L1|UGCG|SDCBP|BCL2L11|HMOX1|PPARGC1A|AKIRIN2|EGR1|SMAD1|PHC2|TGFB2|JUND|JAG1|YES1|POU2F1|GADD45B|HSPA5|EIF2AK3|…
30154	2.4444e-06	0.00035067	98	858	575	7879	cell differentiation	ATF1|CYFIP1|CSF1|NAB1|WIPF3|TNC|ERO1L|GJA1|ZMIZ1|ZC3H12A|KDR|FAM65B|JUNB|PITX1|TP63|SOX4|SEMA6B|SEMA6D|FST|DAPK3|IFRD1|LIG4|NPNT|RUNX1|COL4A1|TP53|SLC9A1|ZFP36L1|PPARGC1A|SOCS7|SRPK2|EGR1|SMAD1|TGFB2|JUND|JAG1|POU2F1|GADD45B|EIF2AK3|HOOK3|QKI|NFKB2|RCAN1|BCL3|MYF6|STRN|CSPG4|BMPR1A|FGFR1|NRP1|CLIC4|ROBO4|CITED2|MAST2|ADM|LAMC1|SHB|AFF4|CSRP3|SCML1|TIMP1|JAK2|MYOG|EDARADD|TNFRSF12A|DYNLT1|SIRT1|DU…
30334	3.1807e-06	0.00043645	27	142	575	7879	regulation of cell migration	CLIC4|ROBO4|CSF1|CITED2|ABHD2|PDGFB|NEXN|IRS2|HDAC9|THBS1|ICAM1|PLAU|KDR|HMOX1|JAK2|IL6R|SPAG9|TGFB2|JAG1|ANGPT2|ANXA3|RRAS2|GTPBP4|VEGFA|DLC1|BCAR1|HBEGF
48869	4.1879e-06	0.00054556	100	891	575	7879	cellular developmental process	ATF1|CYFIP1|CSF1|NAB1|WIPF3|TNC|ERO1L|GJA1|ZMIZ1|ZC3H12A|KDR|FAM65B|JUNB|PITX1|TP63|SOX4|SEMA6B|SEMA6D|FST|DAPK3|IFRD1|LIG4|NPNT|RUNX1|COL4A1|TP53|SLC9A1|ZFP36L1|PPARGC1A|SOCS7|SRPK2|EGR1|SMAD1|TGFB2|JUND|JAG1|POU2F1|GADD45B|EIF2AK3|HOOK3|QKI|NFKB2|RCAN1|BCL3|MYF6|STRN|CSPG4|BMPR1A|FGFR1|NRP1|CLIC4|ROBO4|CITED2|MAST2|ADM|LAMC1|SHB|AFF4|CSRP3|SCML1|TIMP1|JAK2|BBS5|MYOG|EDARADD|TNFRSF12A|DYNLT1|SIR…
48008	4.4665e-06	0.00054556	9	20	575	7879	platelet-derived growth factor receptor signaling pathway	MYO1E|CSRNP1|PLEKHA1|ZFAND5|PDGFB|ARID5B|JAK2|BCAR1|VEGFA
9887	4.6068e-06	0.00054556	49	347	575	7879	organ morphogenesis	ATF1|ERRFI1|NRP1|CSRNP1|CDKN1A|CSF1|ELN|NAB1|ZFAND5|TNC|ADM|GJA1|HEY1|ZMIZ1|ADAMTS1|MYC|PPAT|BBS5|TP63|NKX3-1|EDARADD|RBM15|ANXA3|FST|ARID5B|ALDH1A3|KCNQ4|CD44|SATB2|PDGFB|BCL2L11|EGLN1|SPEN|SMAD1|TGFB2|JAG1|ANGPT2|POU2F1|PLEKHA1|FEM1B|TBX3|BMP6|MIB1|VEGFA|NR4A3|ACTC1|DLC1|BMPR1A|FGFR1
9888	4.6673e-06	0.00054556	54	397	575	7879	tissue development	ATF1|ERRFI1|NRP1|CLIC4|CSF1|CITED2|ZFAND5|TNC|ADM|LAMC1|GJA1|CSRP3|PLAU|MYC|KDR|JAK2|JUNB|PITX1|BBS5|TP63|NKX3-1|MYOG|EDARADD|RBM15|FST|ALDH1A3|COL4A1|VGLL2|CD44|SATB2|PDGFB|PPP2CA|UGCG|XIRP1|EGLN1|SPEN|SMAD1|TGFB2|JAG1|FEM1B|EIF2AK3|HNRNPAB|TBX3|BMP6|MIB1|VEGFA|RCAN1|NR4A3|ACTC1|DLC1|COL5A3|MYF6|BMPR1A|FGFR1
8284	5.2129e-06	0.00058757	38	243	575	7879	positive regulation of cell proliferation	NRP1|CDKN1A|CSF1|NOP2|PDGFB|ADM|IRS2|LAMC1|SERTAD1|ZMIZ1|MYC|KDR|HMOX1|E2F3|S1PR3|TIMP1|JAK2|IL6R|TP63|SOX4|IL12RB2|AKIRIN2|TGFB2|IL18|LIG4|OSMR|TBX3|VEGFA|FABP4|KLF5|CDK4|RARA|MDM2|TKT|MFGE8|ATF3|BMPR1A|FGFR1
42127	5.6282e-06	0.0006125	63	492	575	7879	regulation of cell proliferation	NRP1|CDKN1A|BTG1|CSF1|ADM|IRS2|LAMC1|GJA1|ZMIZ1|ADAMTS1|PLAU|MYC|KDR|TIMP1|JAK2|IL6R|TP63|SOX4|NKX3-1|KLF11|WARS|IL18|LIG4|OSMR|SIRT1|GTPBP4|GNL3|PPAP2A|RARA|ARHGEF2|TKT|MFGE8|TP53|ATF3|NOP2|PDGFB|THBS1|SERTAD1|XIRP1|HMOX1|E2F3|S1PR3|IL12RB2|AKIRIN2|SMAD1|EGLN3|TGFB2|JAG1|TBX3|VEGFA|FABP4|KLF5|CDK4|DLC1|DLG5|ABI1|MDM2|STRN|TEK|HSPA1B|HSPA1A|BMPR1A|FGFR1
48534	7.1793e-06	0.00073629	27	148	575	7879	hemopoietic or lymphoid organ development	CSF1|HDAC9|RELB|BCL2L11|IFI16|KDR|TIMP1|JAK2|JUNB|SH2B3|SOX4|SPEN|EGR1|TGFB2|JAG1|RBM15|FST|LIG4|NFKB2|RUNX1|VEGFA|ITPKB|MYO1E|KLF6|BCL3|MYH9|TP53
32879	7.2322e-06	0.00073629	55	413	575	7879	regulation of localization	ATF1|NRP1|GSK3B|CLIC4|ROBO4|CSF1|CITED2|TNC|PRKAG2|IRS2|NUDT4|ICAM1|PANX1|GJA1|PLAU|KDR|ITGAV|JAK2|IL6R|CPT1A|ANXA2|ANXA3|FST|ACTN1|RRAS2|SIRT1|GTPBP4|MFGE8|CRYAB|CHST3|HBEGF|ABHD2|PDGFB|NEXN|ARPP19|HDAC9|THBS1|HMOX1|SPAG9|TGFB2|JAG1|ANGPT2|RBPMS|SORBS1|MIB1|VEGFA|KIAA0226|CYLD|NEDD4|DLC1|BCL3|PKIG|BCAR1|BMPR1A|PICALM
51239	7.9069e-06	0.00077982	68	550	575	7879	regulation of multicellular organismal process	ATF1|ERRFI1|NRP1|BTG1|CSF1|NAB1|MAST2|HSPB7|TNC|ADM|PANX1|THBD|GJA1|CSRP3|PLAU|MYC|JAK2|LMCD1|IL6R|TP63|NKX3-1|WARS|RBM15|ANXA2|TNFRSF12A|DYNLT1|ANXA3|FST|IL18|LIG4|RUNX1|ITPKB|ELF1|COL4A2|RARA|ANGPTL2|KCNQ4|TP53|HBEGF|PTGER4|SLC22A5|SDC4|PDGFB|ATP1A1|HDAC9|THBS1|CNN1|HMOX1|S1PR3|SPEN|AKIRIN2|EGR1|SMAD1|TGFB2|JUND|JAG1|ANGPT2|EIF2AK3|HOOK3|TBX3|BMP6|MIB1|VEGFA|BCL3|MAFF|ANXA2P2|BMPR1A|FGFR1
50793	1.3106e-05	0.0012534	57	442	575	7879	regulation of developmental process	ATF1|CYFIP1|ERRFI1|NRP1|BTG1|CSF1|NAB1|GJA1|MYC|KDR|ITGAV|JAK2|JUNB|IL6R|TP63|NKX3-1|WARS|RBM15|TNFRSF12A|DYNLT1|ANXA3|FST|FNDC3B|LIG4|SIRT1|RUNX1|ITPKB|COL4A2|RARA|ANGPTL2|MYH9|SIK1|TP53|PTGER4|HDAC9|THBS1|PPP2CA|BCL2L11|PALMD|HMOX1|SPEN|SMAD1|TGFB2|JUND|JAG1|ANGPT2|ABCA5|EIF2AK3|HOOK3|TBX3|BMP6|MIB1|VEGFA|DLC1|MAFF|BMPR1A|FGFR1
48729	1.4709e-05	0.0013654	30	180	575	7879	tissue morphogenesis	ATF1|ERRFI1|NRP1|CSF1|PDGFB|TNC|ADM|GJA1|MYC|BBS5|TP63|NKX3-1|EGLN1|SPEN|SMAD1|TGFB2|JAG1|RBM15|FEM1B|FST|TBX3|MIB1|VEGFA|ALDH1A3|NR4A3|ACTC1|DLC1|CD44|BMPR1A|FGFR1
40012	1.5356e-05	0.0013847	27	154	575	7879	regulation of locomotion	CLIC4|ROBO4|CSF1|CITED2|ABHD2|PDGFB|NEXN|IRS2|HDAC9|THBS1|ICAM1|PLAU|KDR|HMOX1|JAK2|IL6R|SPAG9|TGFB2|JAG1|ANGPT2|ANXA3|RRAS2|GTPBP4|VEGFA|DLC1|BCAR1|HBEGF
10646	1.715e-05	0.0015035	79	683	575	7879	regulation of cell communication	ATF1|ITSN2|ERRFI1|CSF1|CITED2|PAK1IP1|OTUD7B|TNFAIP3|IRS2|LITAF|DUSP16|ABRA|SH3RF1|GJA1|SPRED1|PLAU|MAP3K9|JAK2|LMCD1|MCF2L2|IL6R|TP63|SOX4|NKX3-1|CPT1A|PLEKHG2|ARHGEF12|ARHGEF15|RALGAPA1|FST|TRAF1|DUSP8|SIRT1|ZDHHC17|DUSP6|ITPKB|CNKSR2|ELF1|KCNQ4|ARHGEF2|TP53|CD44|HBEGF|AGPAT9|PDGFB|ASAP1|IQGAP1|RASAL2|SLC7A1|THBS1|PPP2CA|PPP2CB|HMOX1|RICTOR|SOCS6|SOCS7|TBC1D15|PTPN1|EGR1|TGFB2|JAG1|RBPMS|PLEKHA…
10033	1.7659e-05	0.0015063	65	531	575	7879	response to organic substance	ATF1|CDKN1A|BTG1|DGKD|HSPB7|FHL2|HSPB1|ADM|IRS2|PRDM2|CYR61|ERO1L|PANX1|THBD|GJA1|PPAT|CYP1B1|JAK2|JUNB|IL6R|CPT1A|ANXA3|IL1R1|IGFBP2|TRAFD1|FOS|ACSL3|OSMR|DUSP6|RARA|MFGE8|CRYAB|CD44|ABCB4|PDGFB|HDAC9|THBS1|SLC9A1|PPP2CA|MAT2A|DNAJB5|DNAJB4|HMOX1|SOCS7|PPARGC1B|IL12RB2|AKIRIN2|EGR1|SMAD1|TGFB2|ANGPT2|HSPA1L|HSPA5|SORT1|EIF2AK3|SORBS1|GNG12|DNAJA1|FABP4|NR4A3|ACTC1|DLC1|HSPA1B|BCAR1|HSPA1A
7165	2.1824e-05	0.0018125	109	1030	575	7879	signal transduction	ATF1|DGKD|FAM13A|TNC|IRS2|BACH1|NUDT4|PLAU|RASSF5|PDK4|MAP3K9|IL6R|MAP2K3|PPP1R16B|IL15RA|IL1R1|STARD8|DAPK3|IGFBP2|SIK1|SIK2|TP53|RRAD|ARHGAP17|IQGAP1|RASAL2|SLC9A1|CORO1C|RAP1B|SDCBP|TP53BP2|HMOX1|SOCS6|SRPK2|SMAD1|STARD13|GADD45B|EIF2AK3|TNFRSF10B|RASSF8|GNG12|BMP6|NFKB2|ARHGAP23|RCAN1|CDK4|RHEB|DLG5|BCL3|PI4KB|PKIG|OGT|FGFR1|NRP1|GPSM2|CDKN1A|PRKAG2|ADM|SHB|DUSP16|RND3|ARL5B|SPRED1|DUSP10|YWH…
2053	2.3201e-05	0.0018775	7	14	575	7879	positive regulation of mesenchymal cell proliferation	MYC|KDR|IRS2|TP63|VEGFA|BMPR1A|FGFR1
3007	3.3673e-05	0.0026568	15	63	575	7879	heart morphogenesis	EGLN1|SPEN|TGFB2|RBM15|TNC|TBX3|MIB1|VEGFA|GJA1|ACTC1|ZMIZ1|ADAMTS1|DLC1|BBS5|BMPR1A
2520	3.5046e-05	0.0026977	27	161	575	7879	immune system development	CSF1|HDAC9|RELB|BCL2L11|IFI16|KDR|TIMP1|JAK2|JUNB|SH2B3|SOX4|SPEN|EGR1|TGFB2|JAG1|RBM15|FST|LIG4|NFKB2|RUNX1|VEGFA|ITPKB|MYO1E|KLF6|BCL3|MYH9|TP53
48732	3.7802e-05	0.0028406	20	102	575	7879	gland development	NRP1|TGFB2|CSF1|FEM1B|CITED2|PDGFB|EIF2AK3|TNC|IRS2|TBX3|VEGFA|ALDH1A3|BCL2L11|PPAT|PITX1|TP63|CD44|NKX3-1|BMPR1A|FGFR1
9891	3.9864e-05	0.0029258	57	459	575	7879	positive regulation of biosynthetic process	ATF1|CSRNP1|CSRNP2|CITED2|FHL2|IRS2|GABPB1|ABRA|ETS2|ICAM1|ZMIZ1|MYC|JAK2|JUNB|TP63|SOX4|MYOG|MAP2K3|RBM15|FOS|RUNX1|ELF1|RARA|VGLL2|TP53|CREB5|DDX5|SATB2|PDGFB|ARPP19|THBS1|ARNTL|HMOX1|E2F3|PPARGC1A|PPARGC1B|SPEN|ZNF462|AKIRIN2|EGR1|SMAD1|TGFB2|POU2F1|SAMD4A|ESRRG|SORBS1|HNRNPAB|TBX3|BMP6|VEGFA|KLF6|KLF5|NR4A3|BCL3|MYF6|NAA15|PICALM
51094	5.3526e-05	0.0038393	29	183	575	7879	positive regulation of developmental process	ATF1|NRP1|BTG1|CSF1|HDAC9|THBS1|GJA1|MYC|JAK2|JUNB|IL6R|SMAD1|TGFB2|JUND|JAG1|ANGPT2|TNFRSF12A|ANXA3|FST|FNDC3B|LIG4|BMP6|RUNX1|VEGFA|ITPKB|RARA|ANGPTL2|BMPR1A|FGFR1
31328	5.6517e-05	0.0039637	56	454	575	7879	positive regulation of cellular biosynthetic process	ATF1|CSRNP1|CSRNP2|CITED2|FHL2|IRS2|GABPB1|ABRA|ETS2|ICAM1|ZMIZ1|MYC|JAK2|JUNB|TP63|SOX4|MYOG|MAP2K3|RBM15|FOS|RUNX1|ELF1|RARA|VGLL2|TP53|CREB5|DDX5|SATB2|PDGFB|ARPP19|THBS1|ARNTL|HMOX1|E2F3|PPARGC1A|PPARGC1B|SPEN|ZNF462|AKIRIN2|EGR1|SMAD1|POU2F1|SAMD4A|ESRRG|SORBS1|HNRNPAB|TBX3|BMP6|VEGFA|KLF6|KLF5|NR4A3|BCL3|MYF6|NAA15|PICALM
42493	6.5994e-05	0.0044633	24	140	575	7879	response to drug	SMAD1|CDKN1A|CPT1A|ABCC1|SLC22A5|ABCB4|IGFBP2|PDGFB|FOS|ATP1A1|THBS1|DUSP6|SLC9A1|LIPE|ALDH1A3|FABP4|ACTC1|MAT2A|CDK4|MYC|TOP1|GCLM|JUNB|TP53
45766	6.6468e-05	0.0044633	8	21	575	7879	positive regulation of angiogenesis	BTG1|ANGPT2|ANXA3|ANGPTL2|HDAC9|THBS1|RUNX1|VEGFA
35466	7.319e-05	0.0048122	72	633	575	7879	regulation of signaling pathway	ITSN2|ERRFI1|CSF1|CITED2|OTUD7B|TNFAIP3|LITAF|DUSP16|ABRA|SH3RF1|GJA1|SPRED1|MAP3K9|JAK2|LMCD1|MCF2L2|IL6R|TP63|SOX4|NKX3-1|PLEKHG2|ARHGEF12|ARHGEF15|DYNLT1|RALGAPA1|FST|IGFBP2|TRAF1|DUSP8|SIRT1|ZDHHC17|DUSP6|ITPKB|ELF1|SIK2|ARHGEF2|TP53|CD44|HBEGF|AGPAT9|PDGFB|ASAP1|IQGAP1|RASAL2|SLC7A1|THBS1|PPP2CA|PPP2CB|HMOX1|RICTOR|TBC1D15|PTPN1|TGFB2|JAG1|RBPMS|PLEKHA1|SMURF2|HSPA5|PLK2|SPRY4|TNFRSF10B|VEGF…
9266	7.7838e-05	0.0049317	14	60	575	7879	response to temperature stimulus	HSPA1L|HSPB8|HSPB7|IL18|HSPB1|ADM|FOS|THBS1|ERO1L|VEGFA|DNAJA1|DNAJA4|DNAJB4|CRYAB
10557	7.8133e-05	0.0049317	54	438	575	7879	positive regulation of macromolecule biosynthetic process	ATF1|CSRNP1|CSRNP2|CITED2|FHL2|IRS2|GABPB1|ABRA|ETS2|ZMIZ1|MYC|JUNB|TP63|SOX4|MYOG|MAP2K3|RBM15|FOS|RUNX1|ELF1|RARA|VGLL2|TP53|CREB5|DDX5|SATB2|PDGFB|THBS1|ARNTL|HMOX1|E2F3|PPARGC1A|PPARGC1B|SPEN|ZNF462|AKIRIN2|EGR1|SMAD1|TGFB2|POU2F1|SAMD4A|ESRRG|SORBS1|HNRNPAB|TBX3|BMP6|VEGFA|KLF6|KLF5|NR4A3|BCL3|MYF6|NAA15|PICALM
45682	9.2946e-05	0.0056838	6	12	575	7879	regulation of epidermis development	ERRFI1|TGFB2|NAB1|FST|MAFF|TP63
48523	9.3649e-05	0.0056838	121	1209	575	7879	negative regulation of cellular process	ATF1|ERRFI1|IRS2|GJA1|MYC|PIM1|TP63|SOX4|IER3|FBXW7|FST|ACTN1|ARID5A|ARID5B|LIG4|GTPBP4|RUNX1|KCNQ4|SIK1|TP53|PSMD12|RRAD|ABHD2|PDGFB|BAG3|TP53BP2|HMOX1|SOCS6|SOCS7|HHATL|AKIRIN2|EGR1|PRNP|SMAD1|TGFB2|JAG1|POU2F1|ABCA5|SMURF2|HSPA5|GADD45A|EIF2AK3|HOOK3|CYLD|DLG5|BCL3|MDM2|MYF6|STRN|PKIG|GCLM|EIF4G2|BMPR1A|PICALM|FGFR1|NRP1|KDM5B|GSK3B|CDKN1A|CLIC4|BTG1|CITED2|PAK1IP1|OTUD7B|TNFAIP3|HSPB1|ADM|THB…
9966	0.00010088	0.0060071	59	496	575	7879	regulation of signal transduction	ITSN2|ERRFI1|CSF1|PAK1IP1|OTUD7B|TNFAIP3|LITAF|DUSP16|ABRA|SH3RF1|GJA1|SPRED1|PLAU|MAP3K9|JAK2|LMCD1|MCF2L2|IL6R|PLEKHG2|ARHGEF12|ARHGEF15|RALGAPA1|TRAF1|DUSP8|ZDHHC17|DUSP6|ITPKB|CNKSR2|ARHGEF2|CD44|HBEGF|AGPAT9|PDGFB|ASAP1|IQGAP1|RASAL2|SLC7A1|THBS1|PPP2CA|PPP2CB|HMOX1|RICTOR|SOCS6|SOCS7|TBC1D15|TGFB2|PLEKHA1|PLK2|SPRY4|EIF2AK3|TNFRSF10B|VEGFA|DNMBP|NEDD4|DLC1|TRIM38|TEK|MAP3K14|FGFR1
30097	0.00010286	0.0060114	23	135	575	7879	hemopoiesis	EGR1|TGFB2|JAG1|CSF1|FST|LIG4|HDAC9|RUNX1|RELB|VEGFA|ITPKB|MYO1E|KLF6|IFI16|BCL3|KDR|MYH9|TIMP1|JAK2|JUNB|SH2B3|TP53|SOX4
10464	0.00010828	0.0062135	7	17	575	7879	regulation of mesenchymal cell proliferation	MYC|KDR|IRS2|TP63|VEGFA|BMPR1A|FGFR1
51240	0.00011247	0.0063063	22	127	575	7879	positive regulation of multicellular organismal process	ATF1|AKIRIN2|TGFB2|SLC22A5|CSF1|FST|IL18|ADM|ATP1A1|THBS1|BMP6|VEGFA|PANX1|THBD|MYC|BCL3|RARA|HMOX1|JAK2|IL6R|BMPR1A|FGFR1
61138	0.0001139	0.0063063	14	62	575	7879	morphogenesis of a branching epithelium	SPEN|NRP1|RBM15|CSF1|FEM1B|PDGFB|ADM|TBX3|VEGFA|MYC|TP63|CD44|NKX3-1|FGFR1
23051	0.00011945	0.0065	59	499	575	7879	regulation of signaling process	ITSN2|ERRFI1|CSF1|PAK1IP1|OTUD7B|TNFAIP3|LITAF|DUSP16|ABRA|SH3RF1|GJA1|SPRED1|PLAU|MAP3K9|JAK2|LMCD1|MCF2L2|IL6R|PLEKHG2|ARHGEF12|ARHGEF15|RALGAPA1|TRAF1|DUSP8|ZDHHC17|DUSP6|ITPKB|CNKSR2|ARHGEF2|CD44|HBEGF|AGPAT9|PDGFB|ASAP1|IQGAP1|RASAL2|SLC7A1|THBS1|PPP2CA|PPP2CB|HMOX1|RICTOR|SOCS6|SOCS7|TBC1D15|TGFB2|PLEKHA1|PLK2|SPRY4|EIF2AK3|TNFRSF10B|VEGFA|DNMBP|NEDD4|DLC1|TRIM38|TEK|MAP3K14|FGFR1
48519	0.00012168	0.0065089	128	1301	575	7879	negative regulation of biological process	ATF1|ERRFI1|IRS2|GJA1|PLAU|MYC|PIM1|IL6R|TP63|SOX4|IER3|FBXW7|FST|ACTN1|ARID5A|TRAFD1|ARID5B|LIG4|GTPBP4|RUNX1|COL4A2|KCNQ4|SIK1|TP53|PSMD12|RRAD|ABHD2|PDGFB|BAG3|TP53BP2|HMOX1|SOCS6|SOCS7|HHATL|AKIRIN2|EGR1|PRNP|SMAD1|TGFB2|JAG1|POU2F1|ABCA5|SMURF2|HSPA5|GADD45A|EIF2AK3|HOOK3|CYLD|DLG5|BCL3|MDM2|MYF6|STRN|ANXA2P2|PKIG|GCLM|EIF4G2|BMPR1A|PICALM|FGFR1|NRP1|KDM5B|GSK3B|CDKN1A|CLIC4|BTG1|CITED2|PAK1…
10628	0.00012807	0.0067365	49	393	575	7879	positive regulation of gene expression	ATF1|CSRNP1|CSRNP2|CSF1|CITED2|FHL2|GABPB1|ABRA|ETS2|ZMIZ1|MYC|JUNB|TP63|SOX4|MYOG|MAP2K3|RBM15|FOS|RUNX1|ELF1|RARA|VGLL2|TP53|CREB5|DDX5|SATB2|ARNTL|RELB|E2F3|PPARGC1A|PPARGC1B|SPEN|ZNF462|AKIRIN2|EGR1|SMAD1|POU2F1|ESRRG|HNRNPAB|TBX3|BMP6|VEGFA|KLF6|KLF5|NR4A3|BCL3|MYF6|NAA15|PICALM
22414	0.00013244	0.0068523	48	383	575	7879	reproductive process	BTG1|CSF1|CITED2|MAST2|WIPF3|TNC|ADM|AFF4|ICAM1|LIPE|THBD|BCL2L11|ZMIZ1|ADAMTS1|PLAU|PPAT|KDR|JUNB|TP63|NKX3-1|SPAG9|TSNAX|SMAD1|TGFB2|ANGPT2|DYNLT1|FEM1B|IL1R1|FST|IGFBP2|EIF2AK3|LIG4|FOS|SIRT1|TBX3|BMP6|BYSL|THOC6|VEGFA|DNAJA1|NEDD4|DLC1|MAFF|PPAP2A|RQCD1|MFGE8|CD44|BMPR1A
3	0.00014115	0.0071852	48	384	575	7879	reproduction	BTG1|CSF1|CITED2|MAST2|WIPF3|TNC|ADM|AFF4|ICAM1|LIPE|THBD|BCL2L11|ZMIZ1|ADAMTS1|PLAU|PPAT|KDR|JUNB|TP63|NKX3-1|SPAG9|TSNAX|SMAD1|TGFB2|ANGPT2|DYNLT1|FEM1B|IL1R1|FST|IGFBP2|EIF2AK3|LIG4|FOS|SIRT1|TBX3|BMP6|BYSL|THOC6|VEGFA|DNAJA1|NEDD4|DLC1|MAFF|PPAP2A|RQCD1|MFGE8|CD44|BMPR1A
51272	0.00014934	0.0073931	17	87	575	7879	positive regulation of cellular component movement	SPAG9|TGFB2|CSF1|ANXA3|PDGFB|RRAS2|IRS2|HDAC9|THBS1|ICAM1|VEGFA|KDR|JAK2|IL6R|BCAR1|CHST3|HBEGF
30335	0.00014992	0.0073931	16	79	575	7879	positive regulation of cell migration	SPAG9|TGFB2|CSF1|ANXA3|PDGFB|RRAS2|IRS2|HDAC9|THBS1|ICAM1|VEGFA|KDR|JAK2|IL6R|BCAR1|HBEGF
7166	0.00015647	0.0075973	65	570	575	7879	cell surface receptor linked signaling pathway	CSRNP1|GPSM2|GSK3B|DGKD|ZFAND5|IRS2|HEY1|ADAMTS1|KDR|RSPO3|ITGAV|JAK2|IL6R|SOX4|TLE4|RBM15|ARHGEF12|IL1R1|FST|ARID5B|FOS|TNFRSF1B|OSMR|ITPKB|PPAP2A|MYH9|TKT|XPR1|HBEGF|PTGER4|PDGFB|ELTD1|S1PR3|SOCS7|IL12RB2|SPEN|SMAD1|TGFB2|JAG1|ANGPT2|PLEKHA1|SMURF2|HOMER2|CSNK1A1|SORT1|EIF2AK3|TNFRSF10B|SORBS1|GNG12|BMP6|MIB1|VEGFA|CYLD|HEYL|BCL9|MYO1E|KLF6|CLEC2B|ABI1|RQCD1|STRN|TEK|BCAR1|BMPR1A|FGFR1
7169	0.00016017	0.0076312	22	130	575	7879	transmembrane receptor protein tyrosine kinase signaling pathway	CSRNP1|DGKD|ANGPT2|PLEKHA1|SORT1|ZFAND5|PDGFB|EIF2AK3|ARID5B|IRS2|SORBS1|VEGFA|MYO1E|ABI1|KDR|TEK|JAK2|TKT|SOCS7|BCAR1|HBEGF|FGFR1
42771	0.000162	0.0076312	6	13	575	7879	DNA damage response, signal transduction by p53 class mediator resulting in induction of apoptosis	IFI16|BCL3|AEN|USP28|TP53|TP63
23046	0.00019581	0.0089561	113	1133	575	7879	signaling process	ATF1|DGKD|NAB1|FAM13A|TNC|IRS2|BACH1|NUDT4|PLAU|RASSF5|PDK4|MAP3K9|IL6R|MAP2K3|PPP1R16B|IL15RA|IL1R1|STARD8|DAPK3|IGFBP2|SIK1|SIK2|TP53|RRAD|ARHGAP17|IQGAP1|RASAL2|SLC9A1|CORO1C|RAP1B|SDCBP|TP53BP2|HMOX1|SOCS6|SRPK2|SMAD1|STARD13|GADD45B|EIF2AK3|TNFRSF10B|RASSF8|GNG12|QKI|BMP6|NFKB2|ARHGAP23|RCAN1|CDK4|RHEB|DLG5|BCL3|PI4KB|PKIG|OGT|FGFR1|NRP1|GPSM2|CDKN1A|PRKAG2|ADM|SHB|DUSP16|RND3|ARL5B|SPRED1|D…
23060	0.00019581	0.0089561	113	1133	575	7879	signal transmission	ATF1|DGKD|NAB1|FAM13A|TNC|IRS2|BACH1|NUDT4|PLAU|RASSF5|PDK4|MAP3K9|IL6R|MAP2K3|PPP1R16B|IL15RA|IL1R1|STARD8|DAPK3|IGFBP2|SIK1|SIK2|TP53|RRAD|ARHGAP17|IQGAP1|RASAL2|SLC9A1|CORO1C|RAP1B|SDCBP|TP53BP2|HMOX1|SOCS6|SRPK2|SMAD1|STARD13|GADD45B|EIF2AK3|TNFRSF10B|RASSF8|GNG12|QKI|BMP6|NFKB2|ARHGAP23|RCAN1|CDK4|RHEB|DLG5|BCL3|PI4KB|PKIG|OGT|FGFR1|NRP1|GPSM2|CDKN1A|PRKAG2|ADM|SHB|DUSP16|RND3|ARL5B|SPRED1|D…
48536	0.00020023	0.009009	5	9	575	7879	spleen development	SPEN|BCL2L11|RBM15|BCL3|NFKB2
1763	0.00020267	0.009009	15	73	575	7879	morphogenesis of a branching structure	SPEN|NRP1|RBM15|CSF1|FEM1B|PDGFB|ADM|TBX3|VEGFA|MYC|KDR|TP63|CD44|NKX3-1|FGFR1
42981	0.00022606	0.0098121	63	555	575	7879	regulation of apoptosis	ATF1|NRP1|GSK3B|CDKN1A|BTG1|CITED2|TNFAIP3|HSPB1|IRS2|SH3RF1|PIM1|JAK2|PHLDA1|IL6R|TP63|SOX4|IER3|PLEKHG2|ARHGEF12|ACTN2|ACTN1|DAPK3|IL18|LIG4|AEN|TRAF1|SIRT1|DUSP6|ALDH1A3|G2E3|ANGPTL2|ARHGEF2|CRYAB|TP53|CD44|THBS1|PPP2CA|PPP2CB|BCL2L11|IFI16|BAG3|TP53BP2|HMOX1|PRNP|TGFB2|HSPA5|FEM1B|SORT1|EIF2AK3|TNFRSF10B|USP28|TBX3|VEGFA|STK17A|STK17B|DLC1|DLG5|BCL3|GCLM|HSPA1B|BCAR1|HSPA1A|FGFR1
6468	0.00022696	0.0098121	50	413	575	7879	protein amino acid phosphorylation	GSK3B|SMG1|CDKN1A|MAST4|MAST2|LIPE|PIM1|KDR|PDK4|MAP3K9|JAK2|PRKG1|MAP2K3|DAPK3|DYRK1A|LMTK2|SGK223|RARA|BMP2K|SIK3|ALPK3|SIK1|SIK2|TKT|SGK1|THBS1|TRPM7|PAK2|MAP4K3|IL12RB2|CDK17|SRPK2|SMAD1|TGFB2|YES1|GADD45B|CSNK1A1|PLK2|EIF2AK3|BMP6|WEE1|CDK4|STK17A|STK17B|ABI1|AAK1|TEK|MAP3K14|BMPR1A|FGFR1
31099	0.00023658	0.01009	11	44	575	7879	regeneration	GJA1|CDKN1A|ANGPT2|NR4A3|ANXA3|PLAU|PPAT|MYF6|ADM|JAK2|CHST3
45893	0.00026681	0.011227	42	331	575	7879	positive regulation of transcription, DNA-dependent	ATF1|CSRNP1|CSRNP2|CITED2|SATB2|FHL2|GABPB1|ABRA|ETS2|ARNTL|ZMIZ1|E2F3|JUNB|PPARGC1A|PPARGC1B|TP63|SOX4|MYOG|MAP2K3|SPEN|ZNF462|AKIRIN2|EGR1|SMAD1|POU2F1|RBM15|ESRRG|FOS|HNRNPAB|TBX3|BMP6|RUNX1|VEGFA|KLF6|ELF1|NR4A3|BCL3|RARA|NAA15|VGLL2|TP53|CREB5
43067	0.00027626	0.011472	63	559	575	7879	regulation of programmed cell death	ATF1|NRP1|GSK3B|CDKN1A|BTG1|CITED2|TNFAIP3|HSPB1|IRS2|SH3RF1|PIM1|JAK2|PHLDA1|IL6R|TP63|SOX4|IER3|PLEKHG2|ARHGEF12|ACTN2|ACTN1|DAPK3|IL18|LIG4|AEN|TRAF1|SIRT1|DUSP6|ALDH1A3|G2E3|ANGPTL2|ARHGEF2|CRYAB|TP53|CD44|THBS1|PPP2CA|PPP2CB|BCL2L11|IFI16|BAG3|TP53BP2|HMOX1|PRNP|TGFB2|HSPA5|FEM1B|SORT1|EIF2AK3|TNFRSF10B|USP28|TBX3|VEGFA|STK17A|STK17B|DLC1|DLG5|BCL3|GCLM|HSPA1B|BCAR1|HSPA1A|FGFR1
45941	0.00030695	0.012581	47	386	575	7879	positive regulation of transcription	ATF1|CSRNP1|CSRNP2|DDX5|CITED2|SATB2|FHL2|GABPB1|ABRA|ETS2|ARNTL|ZMIZ1|MYC|E2F3|JUNB|PPARGC1A|PPARGC1B|TP63|SOX4|MYOG|MAP2K3|SPEN|ZNF462|AKIRIN2|EGR1|SMAD1|POU2F1|RBM15|ESRRG|FOS|HNRNPAB|TBX3|BMP6|RUNX1|VEGFA|KLF6|ELF1|KLF5|NR4A3|BCL3|RARA|MYF6|NAA15|VGLL2|TP53|PICALM|CREB5
2009	0.00031183	0.012607	22	136	575	7879	morphogenesis of an epithelium	ATF1|SPEN|NRP1|JAG1|RBM15|CSF1|FEM1B|PDGFB|TNC|ADM|TBX3|MIB1|VEGFA|ALDH1A3|GJA1|MYC|DLC1|BBS5|TP63|CD44|NKX3-1|FGFR1
40017	0.00031556	0.012607	16	84	575	7879	positive regulation of locomotion	SPAG9|TGFB2|CSF1|ANXA3|PDGFB|RRAS2|IRS2|HDAC9|THBS1|ICAM1|VEGFA|KDR|JAK2|IL6R|BCAR1|HBEGF
50896	0.00032534	0.012835	154	1653	575	7879	response to stimulus	ATF1|IFITM3|ERRFI1|DGKD|TNC|SMC5|IRS2|PLOD2|PRDM2|BACH1|ERO1L|ICAM1|LIPE|GJA1|PLAU|MYC|PPAT|PIM1|CYP1B1|MAP3K9|JUNB|IL6R|TP63|CPT1A|TPM4|IL1R1|IGFBP2|TRAFD1|LIG4|ACSL3|ATG14|TP53|XPR1|SLC22A5|ABCB4|ABHD2|PDGFB|SLC9A1|SNN|UBR5|HMOX1|SOCS6|PPARGC1A|SOCS7|PPARGC1B|AKIRIN2|EGR1|PRNP|SMAD1|TGFB2|GADD45B|HSPA5|GADD45A|EIF2AK3|GNG12|BMP6|NFKB2|DARC|NCEH1|NR4A3|CDK4|BCL3|MAFF|MYF6|STRN|GCLM|OGT|BMPR1A|NR…
40007	0.00034853	0.01358	21	128	575	7879	growth	CYFIP1|NOP58|DDX5|TGFB2|DGKD|CSF1|PLEKHA1|PDGFB|ARID5B|ADM|SLC3A2|BMP6|SLC9A1|VEGFA|GJA1|ZMIZ1|PLAU|MYF6|TP53|BMPR1A|FGFR1
51254	0.0003685	0.01405	42	336	575	7879	positive regulation of RNA metabolic process	ATF1|CSRNP1|CSRNP2|CITED2|SATB2|FHL2|GABPB1|ABRA|ETS2|ARNTL|ZMIZ1|E2F3|JUNB|PPARGC1A|PPARGC1B|TP63|SOX4|MYOG|MAP2K3|SPEN|ZNF462|AKIRIN2|EGR1|SMAD1|POU2F1|RBM15|ESRRG|FOS|HNRNPAB|TBX3|BMP6|RUNX1|VEGFA|KLF6|ELF1|NR4A3|BCL3|RARA|NAA15|VGLL2|TP53|CREB5
10941	0.00037067	0.01405	63	565	575	7879	regulation of cell death	ATF1|NRP1|GSK3B|CDKN1A|BTG1|CITED2|TNFAIP3|HSPB1|IRS2|SH3RF1|PIM1|JAK2|PHLDA1|IL6R|TP63|SOX4|IER3|PLEKHG2|ARHGEF12|ACTN2|ACTN1|DAPK3|IL18|LIG4|AEN|TRAF1|SIRT1|DUSP6|ALDH1A3|G2E3|ANGPTL2|ARHGEF2|CRYAB|TP53|CD44|THBS1|PPP2CA|PPP2CB|BCL2L11|IFI16|BAG3|TP53BP2|HMOX1|PRNP|TGFB2|HSPA5|FEM1B|SORT1|EIF2AK3|TNFRSF10B|USP28|TBX3|VEGFA|STK17A|STK17B|DLC1|DLG5|BCL3|GCLM|HSPA1B|BCAR1|HSPA1A|FGFR1
42088	0.00037396	0.01405	4	6	575	7879	T-helper 1 type immune response	BCL3|IL18|RELB|VEGFA
42730	0.0003868	0.014362	3	3	575	7879	fibrinolysis	ANXA2|PLAU|ANXA2P2
60429	0.00040709	0.014939	26	176	575	7879	epithelium development	ATF1|ERRFI1|NRP1|CLIC4|CSF1|PDGFB|TNC|ADM|GJA1|MYC|KDR|BBS5|TP63|NKX3-1|SPEN|JAG1|RBM15|FEM1B|TBX3|MIB1|VEGFA|ALDH1A3|COL4A1|DLC1|CD44|FGFR1
2521	0.00043272	0.015697	13	62	575	7879	leukocyte differentiation	EGR1|CSF1|LIG4|HDAC9|RELB|ITPKB|KLF6|IFI16|BCL3|MYH9|JUNB|TP53|SOX4
45765	0.00043964	0.015767	11	47	575	7879	regulation of angiogenesis	BTG1|ANGPT2|WARS|COL4A2|ANXA3|HMOX1|ANGPTL2|HDAC9|THBS1|RUNX1|VEGFA
35468	0.00048469	0.017187	31	227	575	7879	positive regulation of signaling pathway	CSF1|CITED2|PDGFB|LITAF|THBS1|ABRA|GJA1|HMOX1|RICTOR|JAK2|LMCD1|IL6R|TP63|SOX4|TGFB2|JAG1|RBPMS|PLK2|TNFRSF10B|TRAF1|ZDHHC17|VEGFA|ITPKB|NEDD4|TRIM38|TEK|MAP3K14|CD44|HBEGF|BMPR1A|FGFR1
9893	0.00050316	0.017644	72	674	575	7879	positive regulation of metabolic process	ATF1|CSRNP1|CSRNP2|CSF1|CITED2|FHL2|PRKAG2|IRS2|GABPB1|ABRA|ETS2|ICAM1|GJA1|ZMIZ1|MYC|JAK2|JUNB|IL6R|TP63|SOX4|MYOG|MAP2K3|CPT1A|RBM15|ANXA3|FOS|RUNX1|ELF1|RARA|VGLL2|TP53|CD44|CREB5|DDX5|PSMD12|SATB2|PDGFB|ARPP19|THBS1|ARNTL|RELB|HMOX1|E2F3|PPARGC1A|PPARGC1B|SPEN|ZNF462|AKIRIN2|EGR1|SMAD1|TGFB2|POU2F1|RBPMS|HSPA5|SAMD4A|ESRRG|SORBS1|HNRNPAB|TBX3|BMP6|VEGFA|KLF6|KLF5|NR4A3|NEDD4|DLC1|BCL3|MDM2|MY…
10604	0.00053526	0.018564	69	641	575	7879	positive regulation of macromolecule metabolic process	ATF1|CSRNP1|CSRNP2|CSF1|CITED2|FHL2|PRKAG2|IRS2|GABPB1|ABRA|ETS2|GJA1|ZMIZ1|MYC|JAK2|JUNB|IL6R|TP63|SOX4|MYOG|MAP2K3|RBM15|ANXA3|FOS|RUNX1|ELF1|RARA|VGLL2|TP53|CD44|CREB5|DDX5|PSMD12|SATB2|PDGFB|THBS1|ARNTL|RELB|HMOX1|E2F3|PPARGC1A|PPARGC1B|SPEN|ZNF462|AKIRIN2|EGR1|SMAD1|TGFB2|POU2F1|RBPMS|HSPA5|SAMD4A|ESRRG|SORBS1|HNRNPAB|TBX3|BMP6|VEGFA|KLF6|KLF5|NR4A3|NEDD4|DLC1|BCL3|MDM2|MYF6|NAA15|BMPR1A|PIC…
3006	0.00057732	0.019805	22	142	575	7879	reproductive developmental process	TGFB2|ANGPT2|CSF1|FEM1B|CITED2|FST|MAST2|TNC|SIRT1|AFF4|TBX3|BMP6|VEGFA|BCL2L11|ADAMTS1|RQCD1|KDR|JUNB|TP63|CD44|NKX3-1|BMPR1A
7507	0.00058842	0.019968	24	161	575	7879	heart development	EGLN1|SPEN|NRP1|TGFB2|RBM15|CITED2|TNC|ADM|HDAC9|TBX3|MIB1|VEGFA|GJA1|CSRP3|ACTC1|ZMIZ1|ADAMTS1|DLC1|XIRP1|ALPK3|BBS5|SOX4|NKX3-1|BMPR1A
10647	0.00060447	0.020203	32	240	575	7879	positive regulation of cell communication	CSF1|CITED2|PDGFB|LITAF|THBS1|ABRA|GJA1|HMOX1|RICTOR|JAK2|LMCD1|IL6R|TP63|SOX4|TGFB2|JAG1|RBPMS|PLK2|EIF2AK3|TNFRSF10B|TRAF1|ZDHHC17|VEGFA|ITPKB|NEDD4|TRIM38|TEK|MAP3K14|CD44|HBEGF|BMPR1A|FGFR1
7167	0.00060814	0.020203	29	210	575	7879	enzyme linked receptor protein signaling pathway	CSRNP1|DGKD|ZFAND5|PDGFB|IRS2|KDR|JAK2|SOCS7|SMAD1|TGFB2|ANGPT2|PLEKHA1|SMURF2|SORT1|FST|EIF2AK3|ARID5B|FOS|SORBS1|BMP6|VEGFA|MYO1E|ABI1|TEK|TKT|BCAR1|HBEGF|BMPR1A|FGFR1
22612	0.00064352	0.021114	11	49	575	7879	gland morphogenesis	NRP1|TGFB2|CSF1|FEM1B|PDGFB|TNC|TBX3|TP63|CD44|NKX3-1|FGFR1
30195	0.00064894	0.021114	5	11	575	7879	negative regulation of blood coagulation	THBD|ANXA2|PLAU|PDGFB|ANXA2P2
61041	0.00068822	0.022163	7	22	575	7879	regulation of wound healing	THBD|ANXA2|PLAU|PDGFB|ANXA2P2|THBS1|HBEGF
9725	0.00072522	0.022805	34	263	575	7879	response to hormone stimulus	CDKN1A|BTG1|ABCB4|PDGFB|FHL2|ADM|IRS2|PRDM2|HDAC9|THBS1|GJA1|MAT2A|PPAT|HMOX1|JAK2|JUNB|SOCS7|IL6R|PPARGC1B|EGR1|TGFB2|ANXA3|SORT1|IGFBP2|FOS|SORBS1|GNG12|FABP4|NR4A3|DLC1|RARA|MFGE8|CRYAB|BCAR1
9967	0.00072943	0.022805	25	173	575	7879	positive regulation of signal transduction	CSF1|LITAF|THBS1|ABRA|GJA1|HMOX1|RICTOR|JAK2|LMCD1|IL6R|TGFB2|PLK2|EIF2AK3|TNFRSF10B|TRAF1|ZDHHC17|VEGFA|ITPKB|NEDD4|TRIM38|TEK|MAP3K14|CD44|HBEGF|FGFR1
51173	0.00072983	0.022805	51	445	575	7879	positive regulation of nitrogen compound metabolic process	ATF1|CSRNP1|CSRNP2|CITED2|FHL2|GABPB1|ABRA|ETS2|ICAM1|ZMIZ1|MYC|JAK2|JUNB|TP63|SOX4|MYOG|MAP2K3|RBM15|ANXA3|FOS|RUNX1|ELF1|RARA|VGLL2|TP53|CREB5|DDX5|SATB2|PDGFB|ARNTL|E2F3|PPARGC1A|PPARGC1B|SPEN|ZNF462|AKIRIN2|EGR1|SMAD1|POU2F1|ESRRG|HNRNPAB|TBX3|BMP6|VEGFA|KLF6|KLF5|NR4A3|BCL3|MYF6|NAA15|PICALM
9607	0.00082851	0.025635	29	214	575	7879	response to biotic stimulus	IFITM3|GSK3B|HSPB7|HSPB1|ADM|ERO1L|THBD|IFI16|DNAJB5|DNAJB4|IL6R|TP63|IL12RB2|AKIRIN2|HSPA1L|HSPA5|ANXA3|IFNGR1|EIF2AK3|FOS|GNG12|HIST2H2BE|DNAJA1|BCL3|ABCE1|TP53|HSPA1B|XPR1|HSPA1A
10595	0.0009074	0.027536	6	17	575	7879	positive regulation of endothelial cell migration	ANXA3|PDGFB|KDR|HDAC9|THBS1|VEGFA
31100	0.0009074	0.027536	6	17	575	7879	organ regeneration	CDKN1A|ANGPT2|NR4A3|ANXA3|PPAT|ADM
60	0.00092784	0.027888	7	23	575	7879	protein import into nucleus, translocation	TGFB2|BCL3|JAK2|TNPO1|TP53|ABRA|ARNTL
23056	0.0010229	0.030454	25	177	575	7879	positive regulation of signaling process	CSF1|LITAF|THBS1|ABRA|GJA1|HMOX1|RICTOR|JAK2|LMCD1|IL6R|TGFB2|PLK2|EIF2AK3|TNFRSF10B|TRAF1|ZDHHC17|VEGFA|ITPKB|NEDD4|TRIM38|TEK|MAP3K14|CD44|HBEGF|FGFR1
45935	0.0011623	0.034283	49	432	575	7879	positive regulation of nucleobase, nucleoside, nucleotide and nucleic acid metabolic process	ATF1|CSRNP1|CSRNP2|CITED2|FHL2|GABPB1|ABRA|ETS2|ZMIZ1|MYC|JUNB|TP63|SOX4|MYOG|MAP2K3|RBM15|ANXA3|FOS|RUNX1|ELF1|RARA|VGLL2|TP53|CREB5|DDX5|SATB2|PDGFB|ARNTL|E2F3|PPARGC1A|PPARGC1B|SPEN|ZNF462|AKIRIN2|EGR1|SMAD1|POU2F1|ESRRG|HNRNPAB|TBX3|BMP6|VEGFA|KLF6|KLF5|NR4A3|BCL3|MYF6|NAA15|PICALM
45595	0.0011857	0.034648	37	302	575	7879	regulation of cell differentiation	ATF1|ERRFI1|NRP1|BTG1|CSF1|HDAC9|PPP2CA|ITGAV|JAK2|JUNB|IL6R|TP63|SPEN|SMAD1|TGFB2|JUND|JAG1|RBM15|ABCA5|TNFRSF12A|DYNLT1|FST|FNDC3B|LIG4|HOOK3|SIRT1|TBX3|BMP6|RUNX1|MIB1|ITPKB|MAFF|RARA|SIK1|TP53|BMPR1A|FGFR1
40011	0.0012109	0.034745	28	209	575	7879	locomotion	ATF1|NRP1|BTG1|SATB2|ZFAND5|PDGFB|LAMC1|ATP1A1|PVR|THBS1|CYR61|ICAM1|TYMP|SDCBP|GJA1|PLAU|IL6R|TGFB2|TNFRSF12A|ARID5B|MSN|VEGFA|DNAJA1|NEDD4|PPAP2A|MYH9|BCAR1|CD44
45944	0.001219	0.034745	32	250	575	7879	positive regulation of transcription from RNA polymerase II promoter	ATF1|CSRNP1|CSRNP2|CITED2|SATB2|GABPB1|ABRA|ARNTL|ZMIZ1|JUNB|PPARGC1A|PPARGC1B|TP63|MYOG|SPEN|ZNF462|AKIRIN2|EGR1|SMAD1|POU2F1|RBM15|FOS|BMP6|RUNX1|VEGFA|KLF6|ELF1|NR4A3|BCL3|RARA|VGLL2|TP53
30330	0.0012286	0.034745	7	24	575	7879	DNA damage response, signal transduction by p53 class mediator	CDKN1A|IFI16|BCL3|AEN|USP28|TP53|TP63
43066	0.0012464	0.034745	31	240	575	7879	negative regulation of apoptosis	ATF1|GSK3B|CDKN1A|CITED2|TNFAIP3|HSPB1|IRS2|THBS1|PPP2CB|BAG3|PIM1|HMOX1|TP63|SOX4|IER3|PRNP|HSPA5|SORT1|LIG4|TBX3|VEGFA|BCL3|G2E3|ANGPTL2|GCLM|CRYAB|TP53|HSPA1B|CD44|HSPA1A|FGFR1
33673	0.0012551	0.034745	15	86	575	7879	negative regulation of kinase activity	ERRFI1|CDKN1A|GADD45B|GADD45A|SPRY4|PRKAG2|IRS2|DUSP8|DUSP16|DUSP6|PPP2CA|SPRED1|FABP4|PKIG|PAK2
51241	0.0012551	0.034745	15	86	575	7879	negative regulation of multicellular organismal process	ANXA2|PDGFB|EIF2AK3|ADM|ATP1A1|THBS1|VEGFA|THBD|PLAU|RARA|HMOX1|KCNQ4|ANXA2P2|JAK2|IL6R
30193	0.001278	0.035074	6	18	575	7879	regulation of blood coagulation	THBD|ANXA2|PLAU|PDGFB|ANXA2P2|THBS1
51260	0.0013563	0.0369	14	78	575	7879	protein homooligomerization	PRNP|CPT1A|DGKD|ACTN2|EIF2AK3|PPAT|PIM1|HMOX1|ANGPTL2|C10ORF2|STOM|CRYAB|OGT|TP63
31325	0.0013821	0.037282	68	652	575	7879	positive regulation of cellular metabolic process	ATF1|CSRNP1|CSRNP2|CSF1|CITED2|FHL2|PRKAG2|IRS2|GABPB1|ABRA|ETS2|ICAM1|ZMIZ1|MYC|JAK2|JUNB|IL6R|TP63|SOX4|MYOG|MAP2K3|CPT1A|RBM15|ANXA3|FOS|RUNX1|ELF1|RARA|VGLL2|TP53|CD44|CREB5|DDX5|PSMD12|SATB2|PDGFB|ARPP19|THBS1|ARNTL|HMOX1|E2F3|PPARGC1A|PPARGC1B|SPEN|ZNF462|AKIRIN2|EGR1|SMAD1|POU2F1|RBPMS|HSPA5|SAMD4A|ESRRG|SORBS1|HNRNPAB|TBX3|BMP6|VEGFA|KLF6|KLF5|NR4A3|DLC1|BCL3|MDM2|MYF6|NAA15|BMPR1A|PICALM
43069	0.0014277	0.038186	31	242	575	7879	negative regulation of programmed cell death	ATF1|GSK3B|CDKN1A|CITED2|TNFAIP3|HSPB1|IRS2|THBS1|PPP2CB|BAG3|PIM1|HMOX1|TP63|SOX4|IER3|PRNP|HSPA5|SORT1|LIG4|TBX3|VEGFA|BCL3|G2E3|ANGPTL2|GCLM|CRYAB|TP53|HSPA1B|CD44|HSPA1A|FGFR1
9628	0.0014591	0.038698	30	232	575	7879	response to abiotic stimulus	CDKN1A|HSPB8|HSPB7|HSPB1|ADM|THBS1|ERO1L|SLC9A1|THBD|GJA1|SNN|MAT2A|DNAJB4|JUNB|IL6R|ANGPT2|HSPA1L|IGFBP2|IL18|LIG4|AEN|FOS|USP28|VEGFA|DNAJA1|DNAJA4|NEDD4|BCL3|CRYAB|TP53
43536	0.0015498	0.040759	4	8	575	7879	positive regulation of blood vessel endothelial cell migration	PDGFB|HDAC9|THBS1|VEGFA
2376	0.0015851	0.040935	47	416	575	7879	immune system process	IFITM3|PTGER4|CSF1|PDGFB|SHB|HDAC9|THBS1|ICAM1|RELB|BCL2L11|IFI16|NFIL3|KDR|TIMP1|JAK2|GBP2|JUNB|SH2B3|IL6R|SOX4|SPEN|AKIRIN2|EGR1|TGFB2|JAG1|RBM15|PLEKHA1|ANXA3|IL1R1|FST|IL18|LIG4|MSN|TNFRSF1B|BMP6|NFKB2|RUNX1|VEGFA|ITPKB|MYO1E|KLF6|PXDN|BCL3|MYH9|TP53|BCAR1|BMPR1A
9790	0.0015907	0.040935	42	361	575	7879	embryonic development	ATF1|CITED2|SATB2|ZFAND5|ADM|CYR61|THBD|GJA1|BCL2L11|ZMIZ1|RICTOR|JUNB|PITX1|SH2B3|BBS5|TP63|NKX3-1|EGLN1|AKIRIN2|SMAD1|TGFB2|POU2F1|LIG4|TBX3|MIB1|VEGFA|KIAA1217|TJP1|MYO1E|UGDH|ALDH1A3|NR4A3|DLC1|MAFF|G2E3|MYF6|KCNQ4|MYH9|TOP1|TP53|BMPR1A|FGFR1
50819	0.0015986	0.040935	5	13	575	7879	negative regulation of coagulation	THBD|ANXA2|PLAU|PDGFB|ANXA2P2
7498	0.0016084	0.040935	9	39	575	7879	mesoderm development	PPP2CA|SMAD1|NR4A3|JAK2|TBX3|TP63|VEGFA|BMPR1A|FGFR1
22603	0.001653	0.041734	25	183	575	7879	regulation of anatomical structure morphogenesis	ATF1|CYFIP1|NRP1|BTG1|CSF1|HDAC9|THBS1|PALMD|MYC|KDR|HMOX1|SMAD1|TGFB2|ANGPT2|WARS|TNFRSF12A|ANXA3|RUNX1|VEGFA|COL4A2|DLC1|ANGPTL2|MYH9|BMPR1A|FGFR1
6357	0.0017179	0.04303	56	519	575	7879	regulation of transcription from RNA polymerase II promoter	ATF1|CSRNP1|CSRNP2|CITED2|FHL2|GABPB1|CHD2|BACH1|LITAF|CHD1|ABRA|HEY1|ZMIZ1|MYC|ANKRD1|JUNB|LMCD1|TP63|MYOG|TGIF1|KLF11|RBM15|FST|FOS|SIRT1|RUNX1|ELF1|RARA|SIK1|VGLL2|TP53|SATB2|HDAC9|ARNTL|DNAJB5|HMOX1|PPARGC1A|PPARGC1B|SPEN|ZNF462|AKIRIN2|EGR1|SMAD1|JUND|POU2F1|EAF1|TBX3|BMP6|VEGFA|KLF6|NR4A3|NEDD4|BCL3|MDM2|MYF6|PKIG
6469	0.0017458	0.043384	14	80	575	7879	negative regulation of protein kinase activity	ERRFI1|CDKN1A|GADD45B|GADD45A|SPRY4|PRKAG2|DUSP8|DUSP16|DUSP6|PPP2CA|SPRED1|FABP4|PKIG|PAK2
51789	0.0017944	0.044243	15	89	575	7879	response to protein stimulus	EGR1|ANGPT2|HSPA1L|HSPA5|HSPB7|EIF2AK3|HSPB1|FOS|CYR61|ERO1L|DNAJA1|DNAJB5|DNAJB4|HSPA1B|HSPA1A
8361	0.0018846	0.046089	22	155	575	7879	regulation of cell size	CYFIP1|NRP1|CDKN1A|NOP58|DDX5|TGFB2|BTG1|DGKD|TNFRSF12A|RRAD|PDGFB|SLC3A2|SLC9A1|PPP2CA|APBB2|CRYAB|TP53|HSPA1B|TP63|HBEGF|HSPA1A|FGFR1
51674	0.0019263	0.046089	24	175	575	7879	localization of cell	ATF1|NRP1|TGFB2|BTG1|TNFRSF12A|SATB2|ZFAND5|PDGFB|ARID5B|MSN|LAMC1|ATP1A1|PVR|THBS1|ICAM1|VEGFA|DNAJA1|SDCBP|GJA1|PPAP2A|MYH9|IL6R|BCAR1|CD44
48870	0.0019263	0.046089	24	175	575	7879	cell motility	ATF1|NRP1|TGFB2|BTG1|TNFRSF12A|SATB2|ZFAND5|PDGFB|ARID5B|MSN|LAMC1|ATP1A1|PVR|THBS1|ICAM1|VEGFA|DNAJA1|SDCBP|GJA1|PPAP2A|MYH9|IL6R|BCAR1|CD44
6950	0.001935	0.046089	96	995	575	7879	response to stress	ERRFI1|NRP1|GSK3B|SMG1|CDKN1A|BTG1|SRXN1|CITED2|HSPB8|HSPB7|TNC|HSPB1|SMC5|ADM|PLOD2|BACH1|ERO1L|THBD|GJA1|DUSP10|PLAU|PIM1|ANKRD1|MAP3K9|JAK2|IL6R|TP63|TPM4|ANXA3|IFNGR1|IL1R1|IGFBP2|IL18|LIG4|AEN|FOS|ATG14|SIRT1|HIST2H2BE|DUSP6|ETV5|SFPQ|PXDN|CRY1|ANGPTL2|SGK1|CRYAB|TP53|CD44|CHST3|ITIH4|ABHD2|PDGFB|TFPI|HDAC9|THBS1|PPP2CB|SNN|IFI16|DNAJB5|DNAJB4|UBR5|HMOX1|S1PR3|STX3|SOCS6|PPARGC1A|MAP4K3|EGLN…
35239	0.0019423	0.046089	20	136	575	7879	tube morphogenesis	ATF1|SPEN|NRP1|RBM15|CSF1|ADM|TBX3|MIB1|VEGFA|GJA1|BCL2L11|NR4A3|MYC|DLC1|KDR|GCLM|BBS5|TP63|CD44|NKX3-1
60548	0.0019845	0.046358	31	247	575	7879	negative regulation of cell death	ATF1|GSK3B|CDKN1A|CITED2|TNFAIP3|HSPB1|IRS2|THBS1|PPP2CB|BAG3|PIM1|HMOX1|TP63|SOX4|IER3|PRNP|HSPA5|SORT1|LIG4|TBX3|VEGFA|BCL3|G2E3|ANGPTL2|GCLM|CRYAB|TP53|HSPA1B|CD44|HSPA1A|FGFR1
51704	0.0019881	0.046358	49	443	575	7879	multi-organism process	DDX3X|CITED2|HSPB1|ADM|PVR|ICAM1|LIPE|THBD|PLAU|PPAT|KDR|ITGAV|KPNA2|TNPO1|JUNB|IL6R|KPNA1|RBM15|DYNLT1|ANXA3|IFNGR1|IGFBP2|FOS|SIRT1|HIST2H2BE|THOC6|TOP1|SLC25A5|MFGE8|TP53|XPR1|ANKRD17|SLC22A5|IFI16|EIF4E|PAK2|IL12RB2|SPEN|AKIRIN2|ANGPT2|EAF1|GNG12|BYSL|NEDD4|BCL3|MAFF|ZYX|MDM2|ABCE1
1701	0.0020055	0.046358	21	146	575	7879	in utero embryonic development	EGLN1|CITED2|ZFAND5|LIG4|ADM|CYR61|TBX3|MIB1|VEGFA|TJP1|MYO1E|GJA1|BCL2L11|ZMIZ1|MAFF|G2E3|MYH9|JUNB|TP53|BMPR1A|FGFR1
51348	0.0020124	0.046358	15	90	575	7879	negative regulation of transferase activity	ERRFI1|CDKN1A|GADD45B|GADD45A|SPRY4|PRKAG2|IRS2|DUSP8|DUSP16|DUSP6|PPP2CA|SPRED1|FABP4|PKIG|PAK2
8630	0.0020547	0.04699	7	26	575	7879	DNA damage response, signal transduction resulting in induction of apoptosis	IFI16|BCL3|HMOX1|AEN|USP28|TP53|TP63
Down-regulated in elderly muscle 5 h post-ECC exercise:
48511	3.8744e-08	6.4316e-05	11	72	138	7879	rhythmic process	PER1|ERMP1|PER3|DBP|HLF|MSTN|ANGPT1|TEF|BHLHE41|BCL2|FOXO3
51239	2.5274e-05	0.010326	24	550	138	7879	regulation of multicellular organismal process	USP46|LGI1|ACHE|MYLK2|ARG2|SLC27A1|CEBPB|HLF|MSTN|LDB1|THRA|AMIGO1|SIX1|FOXO3|TOB2|ACVR2B|AKAP1|HOXA11|NFKBIA|AR|SGPL1|BCL2|PRKCQ|SKIL
48731	2.9194e-05	0.010326	42	1298	138	7879	system development	ACHE|MYLK2|CEBPB|HLF|MSTN|LDB1|THRA|AMIGO1|BHLHE41|FHL3|SIX1|AQP4|FOXO3|HOXA11|SGPL1|EXTL1|ERMP1|SUFU|NPHP1|CA4|CHRNA10|PITX2|EPHB1|SKIL|SGCG|PITX3|LGI1|TLE1|TCF15|ANGPT1|FZD7|NFATC3|TFEB|DTNBP1|ACVR2B|AR|SBK1|PRPH2|BCL2|PRKCQ|B3GNT1|APBA1
42990	3.1761e-05	0.010326	5	22	138	7879	regulation of transcription factor import into nucleus	NFKBIA|THRA|SUFU|PRKCQ|AKAP1
7275	3.5307e-05	0.010326	48	1584	138	7879	multicellular organismal development	ACHE|MYLK2|CEBPB|HLF|MSTN|LDB1|THRA|AMIGO1|DIXDC1|BHLHE41|FHL3|SIX1|AQP4|FOXO3|HOXA11|SGPL1|EXTL1|ERMP1|SUFU|NPHP1|CA4|CHRNA10|PITX2|EPHB1|SKIL|CSRP2BP|SGCG|PITX3|LGI1|ARG2|TLE1|TCF15|ANGPT1|FZD7|NFATC3|OSGIN1|TFEB|DTNBP1|ACVR2B|AR|SBK1|PRPH2|ZNF74|KLF9|BCL2|PRKCQ|B3GNT1|APBA1
48513	3.811e-05	0.010326	34	963	138	7879	organ development	ACHE|MYLK2|CEBPB|HLF|MSTN|LDB1|THRA|BHLHE41|FHL3|SIX1|FOXO3|HOXA11|SGPL1|ERMP1|SUFU|NPHP1|CA4|CHRNA10|PITX2|EPHB1|SKIL|SGCG|PITX3|TLE1|TCF15|ANGPT1|NFATC3|TFEB|ACVR2B|AR|SBK1|PRPH2|BCL2|PRKCQ
32502	4.3544e-05	0.010326	51	1739	138	7879	developmental process	ACHE|MYLK2|MSTN|LDB1|THRA|DIXDC1|BHLHE41|FHL3|SIX1|AQP4|SLC2A4|HOXA11|SUFU|CA4|PITX2|EPHB1|NEO1|CSRP2BP|SGCG|PITX3|ARG2|TLE1|TCF15|TFEB|AR|PRKCQ|B3GNT1|CEBPB|NDRG3|HLF|AMIGO1|FOXO3|SGPL1|EXTL1|ERMP1|NPHP1|CHRNA10|SKIL|LGI1|ANGPT1|FZD7|NFATC3|OSGIN1|DTNBP1|ACVR2B|SBK1|PRPH2|ZNF74|KLF9|BCL2|APBA1
42992	5.6984e-05	0.011083	4	13	138	7879	negative regulation of transcription factor import into nucleus	NFKBIA|THRA|SUFU|AKAP1
48856	6.0088e-05	0.011083	44	1429	138	7879	anatomical structure development	ACHE|MYLK2|CEBPB|HLF|MSTN|LDB1|THRA|AMIGO1|BHLHE41|FHL3|SIX1|AQP4|FOXO3|HOXA11|SGPL1|EXTL1|ERMP1|SUFU|NPHP1|CA4|CHRNA10|PITX2|EPHB1|SKIL|NEO1|SGCG|PITX3|LGI1|ARG2|TLE1|TCF15|ANGPT1|FZD7|NFATC3|TFEB|DTNBP1|ACVR2B|AR|SBK1|PRPH2|BCL2|PRKCQ|B3GNT1|APBA1
51252	9.2975e-05	0.013991	36	1093	138	7879	regulation of RNA metabolic process	SMARCAL1|CEBPB|HLF|LDB1|THRA|BHLHE41|SIX1|IKZF2|FOXO3|NR3C2|HOXA11|ING2|DBP|SUFU|PITX2|SKIL|PITX3|RBM38|KLF13|TSC22D1|TCF15|TSC22D3|NFATC3|TFEB|NR1D2|KLF15|REXO4|NFKBIA|AR|PER1|PER3|RBL1|TEF|ZNF74|KLF9|JDP2
42308	0.00010586	0.013991	4	15	138	7879	negative regulation of protein import into nucleus	NFKBIA|THRA|SUFU|AKAP1
6355	0.00010786	0.013991	35	1057	138	7879	regulation of transcription, DNA-dependent	SMARCAL1|CEBPB|HLF|LDB1|THRA|BHLHE41|SIX1|IKZF2|FOXO3|NR3C2|HOXA11|ING2|DBP|SUFU|PITX2|SKIL|PITX3|KLF13|TSC22D1|TCF15|TSC22D3|NFATC3|TFEB|NR1D2|KLF15|REXO4|NFKBIA|AR|PER1|PER3|RBL1|TEF|ZNF74|KLF9|JDP2
9887	0.00010957	0.013991	17	347	138	7879	organ morphogenesis	MYLK2|TLE1|TCF15|THRA|ANGPT1|BHLHE41|SIX1|ACVR2B|HOXA11|AR|SGPL1|SUFU|BCL2|CHRNA10|PITX2|EPHB1|PITX3
32501	0.00012373	0.01467	54	1954	138	7879	multicellular organismal process	ACHE|MYLK2|MSTN|LDB1|THRA|DIXDC1|BHLHE41|TESK2|FHL3|SIX1|AQP4|HOXA11|SUFU|CA4|PITX2|EPHB1|CSRP2BP|SGCG|PITX3|ARG2|TLE1|TCF15|TFEB|AR|PRKCQ|B3GNT1|CEBPB|NDRG3|HLF|AMIGO1|FOXO3|TOB2|SGPL1|EXTL1|ERMP1|NPHP1|CHRNA10|CACNG1|SKIL|LGI1|SLC12A2|ANGPT1|FZD7|NFATC3|OSGIN1|DTNBP1|ACVR2B|SBK1|PRPH2|ZNF74|KLF9|BCL2|APBA1|SCN2B
10551	0.00015256	0.016883	9	113	138	7879	regulation of gene-specific transcription from RNA polymerase II promoter	NFKBIA|AR|PER1|THRA|SUFU|TFEB|IKZF2|FOXO3|SKIL
9653	0.00016622	0.017246	26	699	138	7879	anatomical structure morphogenesis	MYLK2|HLF|MSTN|LDB1|THRA|AMIGO1|BHLHE41|SIX1|HOXA11|SGPL1|SUFU|CHRNA10|PITX2|EPHB1|SKIL|NEO1|PITX3|TLE1|TCF15|ANGPT1|DTNBP1|ACVR2B|AR|BCL2|PRKCQ|B3GNT1
46823	0.00017961	0.017539	4	17	138	7879	negative regulation of nucleocytoplasmic transport	NFKBIA|THRA|SUFU|AKAP1
60341	0.00021659	0.019974	10	145	138	7879	regulation of cellular localization	NSF|NFKBIA|ACHE|MYLK2|CNST|THRA|SUFU|FHL3|PRKCQ|AKAP1
44057	0.00024219	0.020722	10	147	138	7879	regulation of system process	USP46|LGI1|ACHE|MYLK2|ARG2|HLF|MSTN|THRA|PRKCQ|AKAP1
6357	0.00024966	0.020722	21	519	138	7879	regulation of transcription from RNA polymerase II promoter	SMARCAL1|CEBPB|KLF13|HLF|TCF15|THRA|NFATC3|TFEB|SIX1|IKZF2|FOXO3|NFKBIA|AR|PER1|DBP|RBL1|TEF|SUFU|KLF9|SKIL|JDP2
32386	0.00029389	0.023231	7	74	138	7879	regulation of intracellular transport	NFKBIA|MYLK2|CNST|THRA|SUFU|PRKCQ|AKAP1
42994	0.00040881	0.02731	3	9	138	7879	cytoplasmic sequestering of transcription factor	NFKBIA|THRA|SUFU
33157	0.00040944	0.02731	6	56	138	7879	regulation of intracellular protein transport	NFKBIA|CNST|THRA|SUFU|PRKCQ|AKAP1
22602	0.00042571	0.02731	5	37	138	7879	ovulation cycle process	ERMP1|MSTN|ANGPT1|BCL2|FOXO3
90317	0.00042774	0.02731	4	21	138	7879	negative regulation of intracellular protein transport	NFKBIA|THRA|SUFU|AKAP1
1541	0.00042774	0.02731	4	21	138	7879	ovarian follicle development	ERMP1|ANGPT1|BCL2|FOXO3
32880	0.0004831	0.029702	8	105	138	7879	regulation of protein localization	NFKBIA|ACHE|CNST|THRA|SUFU|BCL2|PRKCQ|AKAP1
32387	0.00051574	0.030576	4	22	138	7879	negative regulation of intracellular transport	NFKBIA|THRA|SUFU|AKAP1
7423	0.00054846	0.031395	8	107	138	7879	sensory organ development	TCF15|PRPH2|NPHP1|BCL2|CHRNA10|SIX1|EPHB1|SKIL
51223	0.00059503	0.032865	7	83	138	7879	regulation of protein transport	NFKBIA|ACHE|CNST|THRA|SUFU|PRKCQ|AKAP1
3008	0.00061375	0.032865	19	477	138	7879	system process	SLC12A2|ACHE|MYLK2|HLF|MSTN|TCF15|THRA|ANGPT1|AMIGO1|AQP4|PRPH2|NPHP1|CA4|BCL2|CHRNA10|B3GNT1|APBA1|CACNG1|SCN2B
42698	0.00069196	0.035896	5	41	138	7879	ovulation cycle	ERMP1|MSTN|ANGPT1|BCL2|FOXO3
51049	0.00083509	0.04165	13	269	138	7879	regulation of transport	NSF|ACHE|MYLK2|THRA|ANGPT1|FHL3|STON2|AKAP1|NFKBIA|CNST|SUFU|BCL2|PRKCQ
42306	0.00086427	0.04165	5	43	138	7879	regulation of protein import into nucleus	NFKBIA|THRA|SUFU|PRKCQ|AKAP1
50910	0.00090325	0.04165	2	3	138	7879	detection of mechanical stimulus involved in sensory perception of sound	SLC12A2|CHRNA10
51155	0.00090325	0.04165	2	3	138	7879	positive regulation of striated muscle cell differentiation	THRA|BCL2
32583	0.00096616	0.043347	9	145	138	7879	regulation of gene-specific transcription	NFKBIA|AR|PER1|THRA|SUFU|TFEB|IKZF2|FOXO3|SKIL
48705	0.00099309	0.043382	6	66	138	7879	skeletal system morphogenesis	SGPL1|TCF15|THRA|SIX1|ACVR2B|HOXA11
70201	0.001102	0.046907	7	92	138	7879	regulation of establishment of protein localization	NFKBIA|ACHE|CNST|THRA|SUFU|PRKCQ|AKAP1

## Sheet: Young CON vs. ECC (BP)
GO-ID	P-raw	P-corrected	Observed DE genes	Total genes in GO-ID	Total DE genes in GO analysis	Total genes in GO	GO description	Genes in test set
Up-regulated in young muscle 5 h post-CON and post-ECC exercise:
Unique CON:
No enriched GO terms identified
Unique ECC:
10033	9.8695e-05	0.011436	4	547	5	8073	response to organic substance	DNAJB1|ANGPT2|VLDLR|GLUL
9746	0.00022534	0.011436	2	39	5	8073	response to hexose stimulus	ANGPT2|GLUL
9749	0.00022534	0.011436	2	39	5	8073	response to glucose stimulus	ANGPT2|GLUL
34284	0.00022534	0.011436	2	39	5	8073	response to monosaccharide stimulus	ANGPT2|GLUL
9743	0.00032809	0.01332	2	47	5	8073	response to carbohydrate stimulus	ANGPT2|GLUL
42221	0.00059633	0.015716	4	864	5	8073	response to chemical stimulus	DNAJB1|ANGPT2|VLDLR|GLUL
50928	0.00061935	0.015716	1	1	5	8073	negative regulation of positive chemotaxis	ANGPT2
6542	0.00061935	0.015716	1	1	5	8073	glutamine biosynthetic process	GLUL
48014	0.0012384	0.026057	1	2	5	8073	Tie receptor signaling pathway	ANGPT2
51789	0.0012836	0.026057	2	93	5	8073	response to protein stimulus	DNAJB1|ANGPT2
1666	0.0016334	0.029	2	105	5	8073	response to hypoxia	ANGPT2|VLDLR
70482	0.0018236	0.029	2	111	5	8073	response to oxygen levels	ANGPT2|VLDLR
34447	0.0018571	0.029	1	3	5	8073	very-low-density lipoprotein particle clearance	VLDLR
50922	0.0024756	0.031409	1	4	5	8073	negative regulation of chemotaxis	ANGPT2
70389	0.0024756	0.031409	1	4	5	8073	chaperone cofactor-dependent protein refolding	DNAJB1
48521	0.0024756	0.031409	1	4	5	8073	negative regulation of behavior	ANGPT2
51085	0.0037115	0.04432	1	6	5	8073	chaperone mediated protein folding requiring cofactor	DNAJB1
43537	0.004329	0.048821	1	7	5	8073	negative regulation of blood vessel endothelial cell migration	ANGPT2
Common to CON and ECC:
51789	1.8165e-05	0.013532	10	93	165	8073	response to protein stimulus	DNAJA1|EGR1|DNAJB4|EIF2AK3|HSPB1|FOS|HSPA1B|CYR61|HSPA1A|ERO1L
23052	1.9762e-05	0.013532	57	1667	165	8073	signaling	GPSM2|CDKN1A|DGKD|KCNC4|PRKAG2|BACH1|DUSP16|RND3|NUDT4|ERO1L|PANX1|RASSF5|ANKRD1|IL6R|IL1R1|PDE4D|RRAS2|AEN|FOS|WNT9A|DUSP8|TNFRSF1B|CDC42EP3|PPAP2A|ANGPTL2|SIK1|SIK2|HBEGF|ARHGAP17|PPP2CA|SDCBP|SH3BP5|SOCS6|PPARGC1A|SOCS7|SH2B3|IL12RB2|SRPK2|TGFB2|SORT1|SMURF1|EIF2AK3|RASSF8|USP28|VEGFA|NFKB2|DNAJA1|CYLD|RCAN1|GDNF|RAB15|NEDD4|DLG5|PMP22|ASB5|PKIG|BMPR1A
23033	3.4821e-05	0.013532	44	1182	165	8073	signaling pathway	GPSM2|CDKN1A|DGKD|PRKAG2|BACH1|DUSP16|RND3|NUDT4|ERO1L|PPP2CA|SDCBP|SH3BP5|SOCS6|PPARGC1A|IL6R|SOCS7|SH2B3|IL12RB2|SRPK2|TGFB2|IL1R1|SORT1|SMURF1|EIF2AK3|RRAS2|AEN|FOS|WNT9A|DUSP8|TNFRSF1B|USP28|VEGFA|DNAJA1|CYLD|RCAN1|RAB15|NEDD4|DLG5|PPAP2A|SIK1|SIK2|ASB5|HBEGF|BMPR1A
32502	3.6701e-05	0.013532	59	1784	165	8073	developmental process	ERRFI1|CDKN1A|DGKD|WIPF3|ETS2|CYR61|ERO1L|SYNE1|MYC|PEG10|ZC3H12A|PIM1|ANKRD2|IL6R|MYOG|TNFRSF12A|IFRD1|ACSL3|FOS|WNT9A|KCNQ4|ANGPTL2|ALPK3|SIK1|VGLL2|CHST3|HBEGF|SDC4|PPP2CA|ARVCF|XIRP1|RICTOR|PCNT|PPARGC1A|SOCS7|SH2B3|SRPK2|EGR1|TGFB2|SORT1|SMURF1|EIF2AK3|CRIM1|SYNJ2|VEGFA|NFKB2|RCAN1|NR4A3|ACTC1|KLF5|GDNF|NEDD4|MAFF|PMP22|CSPG4|MAFK|DFNA5|LIMS1|BMPR1A
6469	3.7014e-05	0.013532	9	81	165	8073	negative regulation of protein kinase activity	PPP2CA|ERRFI1|CDKN1A|GADD45A|SH3BP5|PRKAG2|PKIG|DUSP8|DUSP16
33673	6.5539e-05	0.019968	9	87	165	8073	negative regulation of kinase activity	PPP2CA|ERRFI1|CDKN1A|GADD45A|SH3BP5|PRKAG2|PKIG|DUSP8|DUSP16
32501	8.8088e-05	0.021342	63	2006	165	8073	multicellular organismal process	ERRFI1|CDKN1A|DGKD|WIPF3|KCNC4|ETS2|CYR61|FAM134B|MYC|ZC3H12A|PIM1|ANKRD2|IL6R|MYOG|TNFRSF12A|IL1R1|IFRD1|ACSL3|FOS|WNT9A|PPAP2A|KCNQ4|ANGPTL2|ALPK3|SIK1|VGLL2|CHST3|HBEGF|SDC4|PPP2CA|SDCBP|ARVCF|XIRP1|RICTOR|PPARGC1A|SH2B3|IL12RB2|EGR1|TGFB2|SORT1|SMURF1|AKR1C1|EIF2AK3|CRIM1|SYNJ2|VEGFA|NFKB2|DNAJA1|DIAPH1|RCAN1|CLCN5|NR4A3|ACTC1|KLF5|GDNF|NEDD4|SLMAP|MAFF|PMP22|CSPG4|MAFK|DFNA5|BMPR1A
51348	9.3401e-05	0.021342	9	91	165	8073	negative regulation of transferase activity	PPP2CA|ERRFI1|CDKN1A|GADD45A|SH3BP5|PRKAG2|PKIG|DUSP8|DUSP16
10646	0.00017531	0.033857	29	701	165	8073	regulation of cell communication	ERRFI1|AGPAT9|TNFAIP3|SLC7A1|DUSP16|ABRA|PPP2CA|PEG10|RICTOR|SOCS6|LMCD1|MCF2L2|IL6R|SOCS7|EGR1|TGFB2|RALGAPA1|SMURF1|EIF2AK3|DUSP8|VEGFA|CYLD|GDNF|NEDD4|KCNQ4|TRIM38|MAP3K14|HBEGF|BMPR1A
23034	0.00019997	0.033857	30	742	165	8073	intracellular signaling pathway	CDKN1A|DGKD|PRKAG2|BACH1|DUSP16|RND3|NUDT4|ERO1L|PPP2CA|SDCBP|SH3BP5|SOCS6|PPARGC1A|SOCS7|SH2B3|SRPK2|EIF2AK3|RRAS2|AEN|DUSP8|USP28|DNAJA1|RCAN1|RAB15|NEDD4|DLG5|PPAP2A|SIK1|SIK2|ASB5
9266	0.00020373	0.033857	7	60	165	8073	response to temperature stimulus	DNAJA1|HSPB8|DNAJB4|HSPB1|FOS|VEGFA|ERO1L
42692	0.00027567	0.035375	8	83	165	8073	muscle cell differentiation	MYOG|RCAN1|ACTC1|SORT1|IFRD1|XIRP1|VEGFA|SYNE1
90183	0.00027626	0.035375	3	7	165	8073	regulation of kidney development	GDNF|MYC|VEGFA
6986	0.00027726	0.035375	7	63	165	8073	response to unfolded protein	DNAJA1|DNAJB4|EIF2AK3|HSPB1|HSPA1B|HSPA1A|ERO1L
50794	0.00029028	0.035375	101	3850	165	8073	regulation of cellular process	ERRFI1|DGKD|BACH1|ABRA|ETS2|NUDT4|MYC|PEG10|RASSF5|PIM1|IL6R|KPNA1|IL1R1|RALGAPA1|FNDC3B|ARID5A|KCNQ4|SIK1|SIK2|ATF3|SDC4|ABHD2|ARHGAP17|SDCBP|SOCS6|PPARGC1A|SOCS7|SRPK2|EGR1|HHATL|TGFB2|GADD45A|SMURF1|EIF2AK3|CRIM1|RASSF8|NFKB2|CYLD|RCAN1|NR4A3|GDNF|DLG5|MAFF|MAFK|PKIG|MAP3K14|ZNF774|BMPR1A|GPSM2|CDKN1A|PRKAG2|HSPB1|TNFAIP3|DUSP16|RND3|CYR61|PANX1|ANKRD1|LMCD1|MCF2L2|BOK|MYOG|TNFRSF12A|DYNLT3|PD…
51174	0.00034567	0.03717	18	357	165	8073	regulation of phosphorus metabolic process	ERRFI1|CDKN1A|TGFB2|DGKD|SDC4|GADD45A|PRKAG2|DUSP8|DUSP16|VEGFA|PPP2CA|RCAN1|PPAP2A|PIM1|SH3BP5|PKIG|IL6R|BMPR1A
19220	0.00034567	0.03717	18	357	165	8073	regulation of phosphate metabolic process	ERRFI1|CDKN1A|TGFB2|DGKD|SDC4|GADD45A|PRKAG2|DUSP8|DUSP16|VEGFA|PPP2CA|RCAN1|PPAP2A|PIM1|SH3BP5|PKIG|IL6R|BMPR1A
45859	0.0004725	0.046752	14	245	165	8073	regulation of protein kinase activity	ERRFI1|CDKN1A|TGFB2|DGKD|SDC4|GADD45A|PRKAG2|DUSP8|DUSP16|PPP2CA|PPAP2A|PIM1|SH3BP5|PKIG
50789	0.00049622	0.046752	104	4045	165	8073	regulation of biological process	ERRFI1|DGKD|BACH1|PVR|ABRA|ETS2|NUDT4|MYC|PEG10|RASSF5|PIM1|IL6R|KPNA1|IL1R1|RALGAPA1|FNDC3B|ARID5A|KCNQ4|SIK1|SIK2|ATF3|SLC22A5|SDC4|ABHD2|ARHGAP17|SDCBP|SOCS6|PPARGC1A|SOCS7|SRPK2|EGR1|HHATL|TGFB2|GADD45A|SMURF1|EIF2AK3|CRIM1|RASSF8|NFKB2|CYLD|RCAN1|NR4A3|GDNF|DLG5|MAFF|MAFK|PKIG|MAP3K14|ZNF774|BMPR1A|GPSM2|CDKN1A|PRKAG2|HSPB1|TNFAIP3|DUSP16|RND3|CYR61|PANX1|ANKRD1|LMCD1|MCF2L2|BOK|MYOG|TNFRSF1…
7165	0.00053502	0.046752	37	1051	165	8073	signal transduction	GPSM2|CDKN1A|DGKD|PRKAG2|ARHGAP17|BACH1|DUSP16|RND3|NUDT4|PPP2CA|SDCBP|RASSF5|ANKRD1|SH3BP5|SOCS6|IL6R|SRPK2|IL1R1|PDE4D|EIF2AK3|RASSF8|RRAS2|FOS|WNT9A|DUSP8|USP28|NFKB2|RCAN1|GDNF|RAB15|DLG5|CDC42EP3|ANGPTL2|SIK1|SIK2|PKIG|HBEGF
42325	0.00055879	0.046752	17	340	165	8073	regulation of phosphorylation	ERRFI1|CDKN1A|TGFB2|DGKD|SDC4|GADD45A|PRKAG2|DUSP8|DUSP16|VEGFA|PPP2CA|PPAP2A|PIM1|SH3BP5|PKIG|IL6R|BMPR1A
50896	0.00059019	0.046752	53	1707	165	8073	response to stimulus	ERRFI1|CDKN1A|SMG1|DGKD|HSPB8|HSPB1|SMC5|BACH1|CYR61|ERO1L|PANX1|MYC|ANKRD1|PIM1|IL6R|IL1R1|AEN|ACSL3|FOS|WNT9A|TNFRSF1B|CRY1|ANGPTL2|SGK1|CHST3|SLC22A5|ABHD2|PPP2CA|SNN|NFIL3|DNAJB4|SOCS6|PPARGC1A|SOCS7|IL12RB2|EGR1|TGFB2|GADD45A|SORT1|AKR1C1|EIF2AK3|USP28|VEGFA|NFKB2|DNAJA1|NR4A3|ACTC1|GDNF|NEDD4|MAFF|HSPA1B|HSPA1A|BMPR1A
7275	0.0005909	0.046752	51	1623	165	8073	multicellular organismal development	ERRFI1|CDKN1A|DGKD|WIPF3|ETS2|CYR61|MYC|ZC3H12A|PIM1|ANKRD2|IL6R|MYOG|TNFRSF12A|IFRD1|ACSL3|FOS|WNT9A|KCNQ4|ANGPTL2|ALPK3|SIK1|VGLL2|CHST3|HBEGF|SDC4|PPP2CA|ARVCF|XIRP1|RICTOR|SH2B3|EGR1|TGFB2|SORT1|SMURF1|EIF2AK3|CRIM1|SYNJ2|VEGFA|NFKB2|RCAN1|NR4A3|ACTC1|KLF5|GDNF|NEDD4|MAFF|PMP22|CSPG4|MAFK|DFNA5|BMPR1A
9966	0.00061382	0.046752	22	507	165	8073	regulation of signal transduction	ERRFI1|TGFB2|AGPAT9|RALGAPA1|EIF2AK3|TNFAIP3|DUSP8|SLC7A1|DUSP16|ABRA|VEGFA|PPP2CA|NEDD4|RICTOR|TRIM38|SOCS6|LMCD1|MCF2L2|IL6R|SOCS7|MAP3K14|HBEGF
23051	0.00066454	0.047153	22	510	165	8073	regulation of signaling process	ERRFI1|TGFB2|AGPAT9|RALGAPA1|EIF2AK3|TNFAIP3|DUSP8|SLC7A1|DUSP16|ABRA|VEGFA|PPP2CA|NEDD4|RICTOR|TRIM38|SOCS6|LMCD1|MCF2L2|IL6R|SOCS7|MAP3K14|HBEGF
65007	0.00070657	0.047153	107	4227	165	8073	biological regulation	ERRFI1|DGKD|BACH1|PVR|ABRA|ETS2|NUDT4|MYC|PEG10|RASSF5|PIM1|IL6R|KPNA1|IL1R1|RALGAPA1|FNDC3B|ARID5A|KCNQ4|SIK1|SIK2|ATF3|SLC22A5|SDC4|ABHD2|ARHGAP17|SDCBP|SOCS6|PPARGC1A|SOCS7|SRPK2|EGR1|HHATL|TGFB2|GADD45A|SMURF1|EIF2AK3|CRIM1|RASSF8|NFKB2|CYLD|RCAN1|NR4A3|GDNF|DLG5|MAFF|MAFK|PKIG|MAP3K14|ZNF774|BMPR1A|GPSM2|CDKN1A|PRKAG2|HSPB1|TNFAIP3|DUSP16|RND3|CYR61|SYNE1|PANX1|ANKRD1|LMCD1|MCF2L2|BOK|MYOG|T…
10033	0.00070962	0.047153	23	547	165	8073	response to organic substance	EGR1|CDKN1A|TGFB2|DGKD|IL1R1|SORT1|EIF2AK3|HSPB1|ACSL3|FOS|CYR61|ERO1L|PANX1|PPP2CA|DNAJA1|NR4A3|ACTC1|DNAJB4|IL6R|SOCS7|HSPA1B|IL12RB2|HSPA1A
55002	0.00075776	0.047153	5	36	165	8073	striated muscle cell development	MYOG|RCAN1|ACTC1|XIRP1|VEGFA
6913	0.00084757	0.047153	9	122	165	8073	nucleocytoplasmic transport	SMG1|TGFB2|SMURF1|SRSF10|DUSP16|ABRA|ARNTL|KPNA1|THOC6
43549	0.00085151	0.047153	14	260	165	8073	regulation of kinase activity	ERRFI1|CDKN1A|TGFB2|DGKD|SDC4|GADD45A|PRKAG2|DUSP8|DUSP16|PPP2CA|PPAP2A|PIM1|SH3BP5|PKIG
23046	0.00086703	0.047153	39	1157	165	8073	signaling process	GPSM2|CDKN1A|DGKD|KCNC4|PRKAG2|ARHGAP17|BACH1|DUSP16|RND3|NUDT4|PPP2CA|SDCBP|RASSF5|ANKRD1|SH3BP5|SOCS6|IL6R|SRPK2|IL1R1|PDE4D|EIF2AK3|RASSF8|RRAS2|FOS|WNT9A|DUSP8|USP28|NFKB2|RCAN1|GDNF|RAB15|DLG5|CDC42EP3|PMP22|ANGPTL2|SIK1|SIK2|PKIG|HBEGF
23060	0.00086703	0.047153	39	1157	165	8073	signal transmission	GPSM2|CDKN1A|DGKD|KCNC4|PRKAG2|ARHGAP17|BACH1|DUSP16|RND3|NUDT4|PPP2CA|SDCBP|RASSF5|ANKRD1|SH3BP5|SOCS6|IL6R|SRPK2|IL1R1|PDE4D|EIF2AK3|RASSF8|RRAS2|FOS|WNT9A|DUSP8|USP28|NFKB2|RCAN1|GDNF|RAB15|DLG5|CDC42EP3|PMP22|ANGPTL2|SIK1|SIK2|PKIG|HBEGF
61061	0.00089566	0.047153	12	203	165	8073	muscle structure development	MYOG|RCAN1|TGFB2|ACTC1|SORT1|IFRD1|XIRP1|ANKRD2|VGLL2|HBEGF|VEGFA|SYNE1
51169	0.00089874	0.047153	9	123	165	8073	nuclear transport	SMG1|TGFB2|SMURF1|SRSF10|DUSP16|ABRA|ARNTL|KPNA1|THOC6
32006	0.00090524	0.047153	3	10	165	8073	regulation of TOR signaling cascade	AGPAT9|RICTOR|SLC7A1
48518	0.00092861	0.047153	45	1404	165	8073	positive regulation of biological process	CDKN1A|SLC22A5|SDC4|PRKAG2|PVR|ABRA|ETS2|CYR61|ARNTL|PANX1|PPP2CA|MYC|PIM1|RICTOR|PPARGC1A|LMCD1|IL6R|EIF4E|IL12RB2|BOK|MYOG|EGR1|TGFB2|TNFRSF12A|SORT1|SMURF1|FNDC3B|EIF2AK3|RRAS2|AEN|FOS|USP28|VEGFA|NR4A3|KLF5|GDNF|NEDD4|ANGPTL2|TRIM38|VGLL2|MAP3K14|ATF3|CHST3|HBEGF|BMPR1A
Down-regulated in young muscle 5 h post-CON and post-ECC exercise:
Unique CON:
No enriched GO terms identified
Unique ECC:
No enriched GO terms identified
Common to CON and ECC:
65007	1.0073e-07	8.3002e-05	29	4227	30	8073	biological regulation	HLF|NDRG3|CDCA7L|AQP4|CXXC5|TOB2|RHOBTB1|HOXA11|NR3C2|SGPL1|DBP|P2RY1|PITX3|SLC12A2|ANGPT1|MID1IP1|GAB1|NR1D2|LBX1|RGMB|ACVR2B|DUSP7|GADD45G|NFKBIA|PER1|PER3|GLRB|TEF|DDIT4
48511	3.0591e-07	0.00012603	6	77	30	8073	rhythmic process	PER1|HLF|DBP|PER3|ANGPT1|TEF
50789	3.0277e-05	0.0083161	26	4045	30	8073	regulation of biological process	HLF|NDRG3|CDCA7L|CXXC5|TOB2|RHOBTB1|HOXA11|NR3C2|SGPL1|DBP|P2RY1|PITX3|ANGPT1|MID1IP1|GAB1|NR1D2|LBX1|RGMB|ACVR2B|DUSP7|GADD45G|NFKBIA|PER1|PER3|TEF|DDIT4
50794	5.9585e-05	0.012275	25	3850	30	8073	regulation of cellular process	HLF|NDRG3|CDCA7L|CXXC5|TOB2|RHOBTB1|HOXA11|NR3C2|DBP|P2RY1|PITX3|ANGPT1|MID1IP1|GAB1|NR1D2|LBX1|RGMB|ACVR2B|DUSP7|GADD45G|NFKBIA|PER1|PER3|TEF|DDIT4
7166	0.0002037	0.03357	9	592	30	8073	cell surface receptor linked signaling pathway	SLC12A2|NFKBIA|SGPL1|ANGPT1|GLRB|P2RY1|GAB1|RGMB|ACVR2B

## Sheet: Older CON vs. ECC (BP)
GO-ID	P-raw	P-corrected	Observed DE genes	Total genes in GO-ID	Total DE genes in GO analysis	Total genes in GO	GO description	Genes in test set
Up-regulated in older muscle 5 h post-CON and post-ECC exercise:
Unique CON:
No enriched GO terms identified
Unique ECC:
No enriched GO terms identified
Common to CON and ECC:
48514	2.1833e-07	0.0003899	20	173	248	8232	blood vessel morphogenesis	SPEN|NRP1|ROBO4|TGFB2|RBM15|ANXA2|TNFRSF12A|CITED2|CYR61|TYMP|MYO1E|GJA1|ZMIZ1|PLAU|COL4A1|KDR|HMOX1|MYH9|CSPG4|ANXA2P2
1944	4.2471e-07	0.0003899	22	214	248	8232	vasculature development	SPEN|NRP1|ROBO4|TGFB2|RBM15|ANXA2|TNFRSF12A|CITED2|ZFAND5|CYR61|TYMP|MYO1E|GJA1|ZMIZ1|PLAU|COL4A1|KDR|HMOX1|MYH9|CSPG4|ANXA2P2|CD44
1525	5.3656e-07	0.0003899	16	120	248	8232	angiogenesis	SPEN|NRP1|ROBO4|TGFB2|RBM15|ANXA2|TNFRSF12A|CYR61|TYMP|PLAU|COL4A1|KDR|HMOX1|MYH9|CSPG4|ANXA2P2
48534	1.1199e-06	0.00041719	18	158	248	8232	hemopoietic or lymphoid organ development	SPEN|EGR1|TGFB2|RBM15|CSF1|FST|RUNX1|RELB|NFKB2|MYO1E|IFI16|BCL3|KDR|MYH9|TIMP1|TP53|SH2B3|SOX4
32502	1.132e-06	0.00041719	88	1838	248	8232	developmental process	CYFIP1|NRP1|CDKN1A|CLIC4|ROBO4|DGKD|CSF1|CITED2|ELN|MAST2|WIPF3|ZFAND5|TNC|LAMC1|ETS2|CYR61|ERO1L|LOXL2|GJA1|SCML1|ZMIZ1|PLAU|MYC|KDR|TIMP1|IL6R|SOX4|TP63|EDARADD|SEMA6B|RBM15|ANXA2|TNFRSF12A|DYNLT1|FST|DAPK3|IFRD1|IGFBP2|ACSL3|RUNX1|PTBP3|COL4A1|KCNQ4|ANGPTL2|MYH9|ALPK3|SIK1|ARHGEF2|VGLL2|TP53|CD44|HBEGF|SDC4|RELB|TYMP|ARVCF|IFI16|XIRP1|HMOX1|FLNB|RICTOR|S1PR3|STX3|PPARGC1A|SOCS7|SH2B3|SPEN|EGR1…
1568	1.1482e-06	0.00041719	21	209	248	8232	blood vessel development	SPEN|NRP1|ROBO4|TGFB2|RBM15|ANXA2|TNFRSF12A|CITED2|CYR61|TYMP|MYO1E|GJA1|ZMIZ1|PLAU|COL4A1|KDR|HMOX1|MYH9|CSPG4|ANXA2P2|CD44
23052	1.5959e-06	0.00049702	83	1711	248	8232	signaling	NRP1|GUCY1B3|GPSM2|CDKN1A|DGKD|ZFAND5|TNC|PRKAG2|RND3|ERO1L|PANX1|GJA1|YWHAQ|PLAU|KDR|PDK4|ANKRD1|IL6R|SOX4|TP63|EDARADD|MAP2K3|PPP1R16B|ARHGEF12|RBM15|IL1R1|FST|PDE4D|DAPK3|IGFBP2|PPP2R5A|DUSP8|OSMR|TNFRSF1B|PPAP2A|RARA|ANGPTL2|MYH9|SIK1|SIK2|TKT|TP53|XPR1|HBEGF|NFAT5|RRAD|ELTD1|ARHGAP17|IQGAP1|CORO1C|SDCBP|IFI16|UBR5|HMOX1|FLNB|S1PR3|SOCS6|PPARGC1A|SOCS7|SH2B3|PPARGC1B|IL12RB2|SPEN|TGFB2|ANGPT2…
2520	3.5437e-06	0.00084303	18	171	248	8232	immune system development	SPEN|EGR1|TGFB2|RBM15|CSF1|FST|RUNX1|RELB|NFKB2|MYO1E|IFI16|BCL3|KDR|MYH9|TIMP1|TP53|SH2B3|SOX4
48518	3.5982e-06	0.00084303	72	1439	248	8232	positive regulation of biological process	NRP1|CDKN1A|CSF1|CITED2|PRKAG2|LAMC1|PVR|ETS2|CYR61|PANX1|GJA1|ZMIZ1|MYC|KDR|TIMP1|IL6R|PHLDA1|SOX4|TP63|MAP2K3|CPT1A|ARHGEF12|PLEKHG2|RBM15|ANXA2|TNFRSF12A|FST|DAPK3|FNDC3B|OSMR|RUNX1|RARA|ANGPTL2|ARHGEF2|TKT|VGLL2|TP53|CD44|HBEGF|DDX5|SDC4|ATP1A1|ARNTL|RELB|IFI16|HMOX1|RICTOR|S1PR3|PPARGC1A|PPARGC1B|IL12RB2|SPAG9|SPEN|EGR1|ZNF462|TGFB2|ANGPT2|RBPMS|SORT1|EIF2AK3|TNFRSF10B|USP28|FABP4|NR4A3|STK1…
48513	4.1935e-06	0.00084303	56	1021	248	8232	organ development	NRP1|CDKN1A|CLIC4|ROBO4|CSF1|CITED2|ELN|ZFAND5|TNC|LAMC1|CYR61|GJA1|SCML1|ZMIZ1|PLAU|MYC|KDR|TIMP1|IL6R|SOX4|TP63|EDARADD|RBM15|ANXA2|TNFRSF12A|FST|ACSL3|RUNX1|COL4A1|KCNQ4|MYH9|ALPK3|VGLL2|TP53|CD44|HBEGF|RELB|TYMP|IFI16|XIRP1|HMOX1|FLNB|SH2B3|SPEN|EGR1|TGFB2|ANGPT2|EIF2AK3|SYNJ2|NFKB2|MYO1E|NR4A3|COL5A3|BCL3|CSPG4|ANXA2P2
32501	4.2538e-06	0.00084303	94	2068	248	8232	multicellular organismal process	CYFIP1|NRP1|GUCY1B3|CDKN1A|CLIC4|ROBO4|DGKD|CSF1|WDR1|CITED2|ELN|MAST2|WIPF3|ZFAND5|TNC|LAMC1|ETS2|CYR61|GJA1|SCML1|ZMIZ1|PLAU|MYC|KDR|CYP1B1|TIMP1|IL6R|SOX4|TP63|EDARADD|SEMA6B|RBM15|ANXA2|TNFRSF12A|TPM4|DYNLT1|IL1R1|FST|DAPK3|IFRD1|ACSL3|RUNX1|COL4A1|PPAP2A|KCNQ4|ANGPTL2|MYH9|ALPK3|SIK1|KIFC3|VGLL2|TP53|CD44|HBEGF|NFAT5|SDC4|ATP1A1|RELB|TYMP|SDCBP|ARVCF|IFI16|XIRP1|HMOX1|FLNB|RICTOR|S1PR3|STX3|…
30154	8.0318e-06	0.0014591	51	915	248	8232	cell differentiation	CYFIP1|NRP1|CLIC4|ROBO4|CSF1|CITED2|MAST2|WIPF3|TNC|LAMC1|ERO1L|GJA1|SCML1|ZMIZ1|KDR|TIMP1|SOX4|TP63|EDARADD|SEMA6B|TNFRSF12A|DYNLT1|FST|DAPK3|IFRD1|RUNX1|COL4A1|ANGPTL2|MYH9|TP53|CD44|RELB|TYMP|IFI16|XIRP1|FLNB|STX3|PPARGC1A|SOCS7|SH2B3|EGR1|TGFB2|ANGPT2|SORT1|EIF2AK3|NFKB2|MYO1E|FABP4|NEDD4|BCL3|CSPG4
48869	1.0451e-05	0.0017526	52	949	248	8232	cellular developmental process	CYFIP1|NRP1|CLIC4|ROBO4|CSF1|CITED2|MAST2|WIPF3|TNC|LAMC1|ERO1L|GJA1|SCML1|ZMIZ1|KDR|TIMP1|SOX4|TP63|EDARADD|SEMA6B|TNFRSF12A|DYNLT1|FST|DAPK3|IFRD1|RUNX1|COL4A1|ANGPTL2|MYH9|ARHGEF2|TP53|CD44|RELB|TYMP|IFI16|XIRP1|FLNB|STX3|PPARGC1A|SOCS7|SH2B3|EGR1|TGFB2|ANGPT2|SORT1|EIF2AK3|NFKB2|MYO1E|FABP4|NEDD4|BCL3|CSPG4
48522	1.6684e-05	0.0025979	66	1336	248	8232	positive regulation of cellular process	NRP1|CDKN1A|CSF1|CITED2|PRKAG2|LAMC1|ETS2|CYR61|PANX1|GJA1|ZMIZ1|MYC|KDR|TIMP1|IL6R|PHLDA1|SOX4|TP63|MAP2K3|CPT1A|ARHGEF12|PLEKHG2|RBM15|ANXA2|TNFRSF12A|DAPK3|FNDC3B|OSMR|RUNX1|RARA|ARHGEF2|TKT|VGLL2|TP53|CD44|HBEGF|DDX5|SDC4|ARNTL|IFI16|HMOX1|RICTOR|S1PR3|PPARGC1A|PPARGC1B|IL12RB2|SPAG9|SPEN|EGR1|ZNF462|TGFB2|RBPMS|SORT1|EIF2AK3|TNFRSF10B|USP28|FABP4|NR4A3|STK17A|NEDD4|BCL3|MDM2|TEK|TRIM38|MAP3K…
23033	1.8987e-05	0.0027594	61	1206	248	8232	signaling pathway	GUCY1B3|GPSM2|CDKN1A|DGKD|ZFAND5|PRKAG2|RND3|ERO1L|YWHAQ|KDR|IL6R|SOX4|TP63|ARHGEF12|RBM15|IL1R1|FST|DAPK3|DUSP8|OSMR|TNFRSF1B|PPAP2A|RARA|MYH9|SIK1|SIK2|TKT|TP53|XPR1|HBEGF|RRAD|ELTD1|SDCBP|IFI16|UBR5|HMOX1|S1PR3|SOCS6|PPARGC1A|SOCS7|SH2B3|PPARGC1B|IL12RB2|SPEN|TGFB2|ANGPT2|SORT1|EIF2AK3|TNFRSF10B|USP28|MYO1E|CLEC2B|STK17A|RHEB|RAB15|NEDD4|BCL3|RQCD1|ASB5|TEK|BCAR1
48646	2.3512e-05	0.0031005	22	273	248	8232	anatomical structure formation involved in morphogenesis	SPEN|NRP1|ROBO4|TGFB2|RBM15|ANXA2|TNFRSF12A|CITED2|CYR61|TYMP|NR4A3|PLAU|COL4A1|KDR|XIRP1|HMOX1|MYH9|CSPG4|ANXA2P2|TP53|TP63|CD44
42771	2.5167e-05	0.0031005	5	13	248	8232	DNA damage response, signal transduction by p53 class mediator resulting in induction of apoptosis	IFI16|BCL3|USP28|TP53|TP63
30097	2.659e-05	0.0031005	15	144	248	8232	hemopoiesis	EGR1|TGFB2|CSF1|FST|RUNX1|RELB|MYO1E|IFI16|BCL3|KDR|MYH9|TIMP1|TP53|SH2B3|SOX4
42730	2.7023e-05	0.0031005	3	3	248	8232	fibrinolysis	ANXA2|PLAU|ANXA2P2
48856	3.7074e-05	0.0037533	71	1508	248	8232	anatomical structure development	CYFIP1|NRP1|CDKN1A|CLIC4|ROBO4|CSF1|CITED2|ELN|ZFAND5|TNC|LAMC1|ETS2|CYR61|GJA1|SCML1|ZMIZ1|PLAU|MYC|KDR|TIMP1|IL6R|SOX4|TP63|EDARADD|SEMA6B|RBM15|ANXA2|TNFRSF12A|DYNLT1|FST|DAPK3|IFRD1|ACSL3|RUNX1|PTBP3|COL4A1|KCNQ4|MYH9|ALPK3|ARHGEF2|VGLL2|TP53|CD44|HBEGF|SDC4|RELB|TYMP|IFI16|XIRP1|HMOX1|FLNB|S1PR3|STX3|SH2B3|SPEN|EGR1|TGFB2|ANGPT2|SORT1|EIF2AK3|CRIM1|SYNJ2|NFKB2|MYO1E|NR4A3|NEDD4|COL5A3|BCL3|C…
50794	3.7382e-05	0.0037533	149	3912	248	8232	regulation of cellular process	ITSN2|CYFIP1|DGKD|CSF1|TNC|HNRNPU|BZW1|BACH2|ETS2|GJA1|ZMIZ1|PLAU|MYC|KDR|PDK4|IL6R|PHLDA1|SOX4|TP63|KPNA1|MAP2K3|PPP1R16B|CPT1A|IL1R1|RALGAPA1|ACTN1|FST|DAPK3|IGFBP2|FNDC3B|ARID5A|RUNX1|KCNQ4|SIK1|SIK2|SRSF5|TP53|ZNF274|DDX5|SDC4|RRAD|ABHD2|ARHGAP17|IQGAP1|CORO1C|SDCBP|HMOX1|SOCS6|PPARGC1A|SOCS7|PPARGC1B|EGR1|PRNP|TGFB2|ABCA5|RBPMS|GADD45A|EIF2AK3|CRIM1|TNFRSF10B|NFKB2|NR4A3|RHEB|FUBP1|BCL3|MAFF…
48731	3.7877e-05	0.0037533	66	1370	248	8232	system development	CYFIP1|NRP1|CDKN1A|CLIC4|ROBO4|CSF1|CITED2|ELN|ZFAND5|TNC|LAMC1|ETS2|CYR61|GJA1|SCML1|ZMIZ1|PLAU|MYC|KDR|TIMP1|IL6R|SOX4|TP63|EDARADD|SEMA6B|RBM15|ANXA2|TNFRSF12A|DYNLT1|FST|DAPK3|ACSL3|RUNX1|COL4A1|KCNQ4|MYH9|ALPK3|VGLL2|TP53|CD44|HBEGF|RELB|TYMP|IFI16|XIRP1|HMOX1|FLNB|STX3|SH2B3|SPEN|EGR1|TGFB2|ANGPT2|SORT1|EIF2AK3|CRIM1|SYNJ2|NFKB2|MYO1E|NR4A3|NEDD4|COL5A3|BCL3|CSPG4|MAFK|ANXA2P2
40011	4.0317e-05	0.0038213	19	223	248	8232	locomotion	NRP1|TGFB2|TNFRSF12A|ZFAND5|MSN|LAMC1|ATP1A1|PVR|CYR61|TYMP|SDCBP|GJA1|PLAU|NEDD4|PPAP2A|MYH9|IL6R|CD44|BCAR1
30198	5.3244e-05	0.0047281	10	72	248	8232	extracellular matrix organization	TGFB2|ANXA2|COL4A2|COL5A3|PXDN|BCL3|ANXA2P2|LAMC1|CYR61|NFKB2
51270	5.4221e-05	0.0047281	16	171	248	8232	regulation of cellular component movement	SPAG9|NRP1|CLIC4|ROBO4|TGFB2|ANGPT2|CSF1|CITED2|ACTN1|ABHD2|PLAU|KDR|HMOX1|IL6R|BCAR1|HBEGF
51239	5.8929e-05	0.0047697	35	582	248	8232	regulation of multicellular organismal process	NRP1|SDC4|CSF1|MAST2|TNC|ATP1A1|PANX1|CNN1|GJA1|PLAU|MYC|HMOX1|S1PR3|IL6R|TP63|SPEN|EGR1|TGFB2|RBM15|ANGPT2|ANXA2|TNFRSF12A|DYNLT1|FST|EIF2AK3|RUNX1|COL4A2|BCL3|MAFF|RARA|KCNQ4|ANGPTL2|ANXA2P2|TP53|HBEGF
30330	6.0001e-05	0.0047697	6	24	248	8232	DNA damage response, signal transduction by p53 class mediator	CDKN1A|IFI16|BCL3|USP28|TP53|TP63
7275	6.1537e-05	0.0047697	76	1673	248	8232	multicellular organismal development	CYFIP1|NRP1|CDKN1A|CLIC4|ROBO4|DGKD|CSF1|CITED2|ELN|WIPF3|ZFAND5|TNC|LAMC1|ETS2|CYR61|GJA1|SCML1|ZMIZ1|PLAU|MYC|KDR|TIMP1|IL6R|SOX4|TP63|EDARADD|SEMA6B|RBM15|ANXA2|TNFRSF12A|DYNLT1|FST|DAPK3|IFRD1|ACSL3|RUNX1|COL4A1|KCNQ4|ANGPTL2|MYH9|ALPK3|SIK1|VGLL2|TP53|CD44|HBEGF|SDC4|RELB|TYMP|ARVCF|IFI16|XIRP1|HMOX1|FLNB|RICTOR|STX3|SH2B3|SPEN|EGR1|PHC2|TGFB2|ANGPT2|SORT1|EIF2AK3|CRIM1|SYNJ2|NFKB2|MYO1E|NR4…
50789	6.345e-05	0.0047697	154	4113	248	8232	regulation of biological process	ITSN2|CYFIP1|DGKD|CSF1|TNC|HNRNPU|BZW1|PVR|BACH2|ETS2|GJA1|ZMIZ1|PLAU|MYC|KDR|PDK4|IL6R|PHLDA1|SOX4|TP63|KPNA1|MAP2K3|PPP1R16B|CPT1A|IL1R1|RALGAPA1|ACTN1|FST|DAPK3|IGFBP2|FNDC3B|ARID5A|RUNX1|COL4A2|KCNQ4|SIK1|SIK2|SRSF5|TP53|ZNF274|DDX5|SDC4|RRAD|ABHD2|ARHGAP17|IQGAP1|UBE2J1|CORO1C|CNN1|SDCBP|HMOX1|SOCS6|PPARGC1A|SOCS7|PPARGC1B|EGR1|PRNP|TGFB2|ABCA5|RBPMS|GADD45A|EIF2AK3|CRIM1|TNFRSF10B|NFKB2|NR4…
9653	7.4563e-05	0.0054182	41	736	248	8232	anatomical structure morphogenesis	CYFIP1|NRP1|CDKN1A|ROBO4|CSF1|CITED2|ELN|ZFAND5|TNC|LAMC1|CYR61|TYMP|GJA1|SCML1|ZMIZ1|PLAU|MYC|KDR|XIRP1|HMOX1|S1PR3|TP63|EDARADD|SPEN|TGFB2|RBM15|ANGPT2|ANXA2|TNFRSF12A|FST|PTBP3|MYO1E|NR4A3|COL4A1|KCNQ4|MYH9|CSPG4|ARHGEF2|ANXA2P2|TP53|CD44
48536	8.9924e-05	0.0063237	4	9	248	8232	spleen development	SPEN|RBM15|BCL3|NFKB2
8630	9.7565e-05	0.0066466	6	26	248	8232	DNA damage response, signal transduction resulting in induction of apoptosis	IFI16|BCL3|HMOX1|USP28|TP53|TP63
8284	0.0001013	0.0066917	20	259	248	8232	positive regulation of cell proliferation	NRP1|CDKN1A|TGFB2|CSF1|LAMC1|OSMR|FABP4|ZMIZ1|MYC|KDR|RARA|MDM2|HMOX1|S1PR3|TIMP1|TKT|IL6R|SOX4|TP63|IL12RB2
10646	0.00011073	0.0071001	40	724	248	8232	regulation of cell communication	ITSN2|CSF1|AGPAT9|CITED2|TNFAIP3|ASAP1|IQGAP1|SLC7A1|GJA1|PLAU|HMOX1|RICTOR|SOCS6|MCF2L2|IL6R|SOCS7|SOX4|TP63|EGR1|CPT1A|TGFB2|ARHGEF12|PLEKHG2|RBPMS|RALGAPA1|FST|EIF2AK3|TNFRSF10B|DUSP8|CNKSR2|NEDD4|MDM2|KCNQ4|ARHGEF2|TEK|TRIM38|TP53|MAP3K14|CD44|HBEGF
43062	0.00013634	0.0084922	11	96	248	8232	extracellular structure organization	TGFB2|ANXA2|COL4A2|COL5A3|PXDN|BCL3|TNC|ANXA2P2|LAMC1|CYR61|NFKB2
65007	0.00014372	0.0087029	158	4302	248	8232	biological regulation	ITSN2|CYFIP1|DGKD|CSF1|TNC|HNRNPU|BZW1|PVR|BACH2|ETS2|GJA1|ZMIZ1|PLAU|MYC|KDR|PDK4|CYP1B1|IL6R|PHLDA1|SOX4|TP63|KPNA1|MAP2K3|PPP1R16B|CPT1A|IL1R1|RALGAPA1|ACTN1|FST|DAPK3|IGFBP2|FNDC3B|ARID5A|RUNX1|COL4A2|KCNQ4|SIK1|SIK2|SRSF5|TP53|ZNF274|DDX5|SDC4|RRAD|ABHD2|ARHGAP17|IQGAP1|UBE2J1|CORO1C|CNN1|SDCBP|HMOX1|SOCS6|PPARGC1A|SOCS7|PPARGC1B|EGR1|PRNP|TGFB2|ABCA5|RBPMS|GADD45A|EIF2AK3|CRIM1|TNFRSF10B|NF…
1558	0.00017531	0.010057	14	151	248	8232	regulation of cell growth	NRP1|CDKN1A|TGFB2|TNFRSF12A|RRAD|IGFBP2|CRIM1|CYR61|TKT|TP53|TP63|CD44|BCAR1|HBEGF
30334	0.00017531	0.010057	14	151	248	8232	regulation of cell migration	SPAG9|CLIC4|ROBO4|TGFB2|ANGPT2|CSF1|CITED2|ABHD2|PLAU|KDR|HMOX1|IL6R|BCAR1|HBEGF
8629	0.00026372	0.014742	7	43	248	8232	induction of apoptosis by intracellular signals	CDKN1A|IFI16|BCL3|HMOX1|USP28|TP53|TP63
32879	0.00030783	0.016777	27	439	248	8232	regulation of localization	NRP1|CLIC4|ROBO4|CSF1|CITED2|ABHD2|TNC|PRKAG2|PANX1|GJA1|PLAU|KDR|HMOX1|IL6R|SPAG9|CPT1A|TGFB2|ANGPT2|ANXA2|RBPMS|ACTN1|FST|KIAA0226|NEDD4|BCL3|BCAR1|HBEGF
40012	0.00038881	0.020673	14	163	248	8232	regulation of locomotion	SPAG9|CLIC4|ROBO4|TGFB2|ANGPT2|CSF1|CITED2|ABHD2|PLAU|KDR|HMOX1|IL6R|BCAR1|HBEGF
50793	0.00042749	0.022189	28	472	248	8232	regulation of developmental process	CYFIP1|NRP1|CSF1|GJA1|PALMD|MYC|KDR|HMOX1|IL6R|TP63|SPEN|TGFB2|RBM15|ANGPT2|ABCA5|TNFRSF12A|DYNLT1|FST|FNDC3B|EIF2AK3|RUNX1|COL4A2|MAFF|RARA|ANGPTL2|MYH9|SIK1|TP53
9966	0.00045245	0.022938	30	522	248	8232	regulation of signal transduction	ITSN2|CSF1|AGPAT9|TNFAIP3|ASAP1|IQGAP1|SLC7A1|GJA1|PLAU|HMOX1|RICTOR|SOCS6|MCF2L2|IL6R|SOCS7|TGFB2|ARHGEF12|PLEKHG2|RALGAPA1|EIF2AK3|TNFRSF10B|DUSP8|CNKSR2|NEDD4|ARHGEF2|TEK|TRIM38|MAP3K14|CD44|HBEGF
51674	0.00047697	0.023107	15	186	248	8232	localization of cell	NRP1|TGFB2|TNFRSF12A|ZFAND5|MSN|LAMC1|ATP1A1|PVR|SDCBP|GJA1|PPAP2A|MYH9|IL6R|CD44|BCAR1
48870	0.00047697	0.023107	15	186	248	8232	cell motility	NRP1|TGFB2|TNFRSF12A|ZFAND5|MSN|LAMC1|ATP1A1|PVR|SDCBP|GJA1|PPAP2A|MYH9|IL6R|CD44|BCAR1
23051	0.00049798	0.0236	30	525	248	8232	regulation of signaling process	ITSN2|CSF1|AGPAT9|TNFAIP3|ASAP1|IQGAP1|SLC7A1|GJA1|PLAU|HMOX1|RICTOR|SOCS6|MCF2L2|IL6R|SOCS7|TGFB2|ARHGEF12|PLEKHG2|RALGAPA1|EIF2AK3|TNFRSF10B|DUSP8|CNKSR2|NEDD4|ARHGEF2|TEK|TRIM38|MAP3K14|CD44|HBEGF
42221	0.00050945	0.02363	44	884	248	8232	response to chemical stimulus	CDKN1A|CLIC4|DGKD|SRXN1|CITED2|TNC|ATP1A1|CYR61|TYMP|ERO1L|PANX1|GJA1|PLAU|MYC|CYP1B1|HMOX1|STX3|IL6R|SOCS7|PPARGC1B|IL12RB2|EGR1|PRNP|CPT1A|TGFB2|ANGPT2|TPM4|IL1R1|SORT1|IGFBP2|EIF2AK3|ACSL3|OSMR|ETV5|FABP4|NR4A3|NEDD4|PXDN|RARA|ANGPTL2|TP53|OGT|CD44|BCAR1
7165	0.00053567	0.024328	51	1075	248	8232	signal transduction	NRP1|GPSM2|CDKN1A|DGKD|TNC|PRKAG2|RND3|YWHAQ|PLAU|PDK4|ANKRD1|IL6R|EDARADD|MAP2K3|PPP1R16B|IL1R1|PDE4D|DAPK3|IGFBP2|PPP2R5A|DUSP8|RARA|ANGPTL2|SIK1|SIK2|TKT|TP53|HBEGF|NFAT5|RRAD|ARHGAP17|IQGAP1|CORO1C|SDCBP|HMOX1|FLNB|S1PR3|SOCS6|ANGPT2|MYO10|EIF2AK3|TNFRSF10B|USP28|NFKB2|STK17A|RHEB|RAB15|BCL3|RQCD1|TEK|OGT
51260	0.000695	0.030576	9	81	248	8232	protein homooligomerization	PRNP|CPT1A|DGKD|EIF2AK3|HMOX1|ANGPTL2|STOM|OGT|TP63
10647	0.00070127	0.030576	18	256	248	8232	positive regulation of cell communication	TGFB2|CSF1|RBPMS|CITED2|EIF2AK3|TNFRSF10B|GJA1|NEDD4|HMOX1|RICTOR|TEK|TRIM38|IL6R|MAP3K14|SOX4|TP63|CD44|HBEGF
16477	0.00079417	0.033947	14	175	248	8232	cell migration	NRP1|TGFB2|TNFRSF12A|ZFAND5|MSN|LAMC1|PVR|SDCBP|GJA1|PPAP2A|MYH9|IL6R|CD44|BCAR1
45682	0.00084434	0.034256	4	15	248	8232	regulation of epidermis development	TGFB2|FST|MAFF|TP63
2521	0.00085023	0.034256	8	67	248	8232	leukocyte differentiation	EGR1|CSF1|IFI16|BCL3|MYH9|TP53|SOX4|RELB
35466	0.00085369	0.034256	35	669	248	8232	regulation of signaling pathway	ITSN2|CSF1|AGPAT9|CITED2|TNFAIP3|ASAP1|IQGAP1|SLC7A1|GJA1|HMOX1|RICTOR|MCF2L2|IL6R|SOX4|TP63|TGFB2|ARHGEF12|PLEKHG2|RBPMS|DYNLT1|RALGAPA1|FST|IGFBP2|TNFRSF10B|DUSP8|NEDD4|MDM2|SIK2|ARHGEF2|TEK|TRIM38|TP53|MAP3K14|CD44|HBEGF
31069	0.00086427	0.034256	3	7	248	8232	hair follicle morphogenesis	TGFB2|FST|TP63
2266	0.00090405	0.034576	2	2	248	8232	follicular dendritic cell activation	BCL3|NFKB2
2268	0.00090405	0.034576	2	2	248	8232	follicular dendritic cell differentiation	BCL3|NFKB2
8361	0.00093701	0.034953	13	158	248	8232	regulation of cell size	CYFIP1|NRP1|CDKN1A|DDX5|TGFB2|NOP58|DGKD|TNFRSF12A|RRAD|SLC3A2|TP53|TP63|HBEGF
2376	0.00095495	0.034953	26	448	248	8232	immune system process	IFITM3|CSF1|RELB|NFIL3|IFI16|KDR|TIMP1|IL6R|SH2B3|SOX4|SPEN|EGR1|TGFB2|RBM15|IL1R1|FST|MSN|TNFRSF1B|RUNX1|NFKB2|MYO1E|PXDN|BCL3|MYH9|TP53|BCAR1
7169	0.00096202	0.034953	12	139	248	8232	transmembrane receptor protein tyrosine kinase signaling pathway	MYO1E|DGKD|ANGPT2|SORT1|ZFAND5|KDR|EIF2AK3|TEK|TKT|SOCS7|BCAR1|HBEGF
35468	0.00099396	0.035522	17	242	248	8232	positive regulation of signaling pathway	TGFB2|CSF1|RBPMS|CITED2|TNFRSF10B|GJA1|NEDD4|HMOX1|RICTOR|TEK|TRIM38|IL6R|MAP3K14|SOX4|TP63|CD44|HBEGF
40008	0.0010404	0.036582	17	243	248	8232	regulation of growth	NRP1|CDKN1A|TGFB2|TNFRSF12A|CSF1|RRAD|IGFBP2|CRIM1|CYR61|TKT|SOCS6|TP53|SOCS7|TP63|CD44|BCAR1|HBEGF
51259	0.0011602	0.040146	12	142	248	8232	protein oligomerization	PRNP|GJA1|CPT1A|DGKD|EIF2AK3|HMOX1|ANGPTL2|STOM|TEK|TP53|OGT|TP63
9967	0.0012945	0.043217	14	184	248	8232	positive regulation of signal transduction	TGFB2|CSF1|EIF2AK3|TNFRSF10B|GJA1|NEDD4|HMOX1|RICTOR|TEK|TRIM38|IL6R|MAP3K14|CD44|HBEGF
45785	0.0013055	0.043217	6	41	248	8232	positive regulation of cell adhesion	TGFB2|SDC4|CSF1|CITED2|KDR|CYR61
7166	0.0013084	0.043217	32	608	248	8232	cell surface receptor linked signaling pathway	GPSM2|DGKD|ZFAND5|ELTD1|KDR|S1PR3|IL6R|SOCS7|SOX4|IL12RB2|SPEN|TGFB2|ARHGEF12|RBM15|ANGPT2|IL1R1|SORT1|FST|EIF2AK3|TNFRSF10B|OSMR|TNFRSF1B|MYO1E|CLEC2B|PPAP2A|RQCD1|MYH9|TEK|TKT|XPR1|BCAR1|HBEGF
51241	0.001488	0.048414	9	90	248	8232	negative regulation of multicellular organismal process	ANXA2|PLAU|EIF2AK3|RARA|KCNQ4|HMOX1|ANXA2P2|ATP1A1|IL6R
Down-regulated in elderly muscle 5 h post-CON and post-ECC exercise:
Unique CON:
No enriched GO terms identified
Unique ECC:
No enriched GO terms identified
Common to CON and ECC:
48511	1.2207e-06	0.0014856	8	80	83	8232	rhythmic process	PER1|DBP|HLF|PER3|MSTN|ANGPT1|TEF|FOXO3
51252	1.2089e-05	0.0065744	27	1150	83	8232	regulation of RNA metabolic process	CEBPB|HLF|LDB1|THRA|SIX1|IKZF2|FOXO3|NR3C2|ING2|DBP|PITX2|SKIL|PITX3|RBM38|KLF13|TSC22D1|TSC22D3|NFATC3|TFEB|NR1D2|KLF15|NFKBIA|PER1|RBL1|PER3|TEF|KLF9
6355	2.056e-05	0.0065744	26	1113	83	8232	regulation of transcription, DNA-dependent	CEBPB|HLF|LDB1|THRA|SIX1|IKZF2|FOXO3|NR3C2|ING2|DBP|PITX2|SKIL|PITX3|KLF13|TSC22D1|TSC22D3|NFATC3|TFEB|NR1D2|KLF15|NFKBIA|PER1|RBL1|PER3|TEF|KLF9
23052	2.1609e-05	0.0065744	34	1711	83	8232	signaling	AMER1|RASL12|ACHE|HLF|LDB1|MSTN|THRA|DIXDC1|ARHGAP18|SIX1|NR3C2|ART1|ABR|SGPL1|ING2|NPHP1|PDE4A|CHRNA10|ITGB6|EPHB1|RBM38|SLC12A2|TLE1|ANGPT1|GAB1|ANK1|ACVR2B|NFKBIA|GNAL|KLF9|PRKCQ|ASB4|SOS1|LGR5
6357	6.653e-05	0.016194	16	532	83	8232	regulation of transcription from RNA polymerase II promoter	CEBPB|KLF13|HLF|THRA|NFATC3|TFEB|SIX1|IKZF2|FOXO3|NFKBIA|PER1|DBP|RBL1|TEF|KLF9|SKIL
48513	0.00012843	0.025996	23	1021	83	8232	organ development	ACHE|CEBPB|TLE1|HLF|LDB1|MSTN|THRA|ANGPT1|NFATC3|TFEB|SIX1|FOXO3|ACVR2B|SGPL1|SBK1|NPHP1|CA4|CHRNA10|PRKCQ|PITX2|EPHB1|SKIL|PITX3
10551	0.00014952	0.025996	7	115	83	8232	regulation of gene-specific transcription from RNA polymerase II promoter	NFKBIA|PER1|THRA|TFEB|IKZF2|FOXO3|SKIL
51239	0.00019101	0.029057	16	582	83	8232	regulation of multicellular organismal process	USP46|ACHE|ARG2|CEBPB|HLF|LDB1|MSTN|THRA|SIX1|FOXO3|TOB2|ACVR2B|NFKBIA|SGPL1|PRKCQ|SKIL
45944	0.00024132	0.032632	10	257	83	8232	positive regulation of transcription from RNA polymerase II promoter	NFKBIA|CEBPB|KLF13|HLF|THRA|NFATC3|TFEB|SIX1|IKZF2|FOXO3
50910	0.00029936	0.036432	2	3	83	8232	detection of mechanical stimulus involved in sensory perception of sound	SLC12A2|CHRNA10
31326	0.0004065	0.042005	34	1968	83	8232	regulation of cellular biosynthetic process	CEBPB|HLF|LDB1|MSTN|THRA|SIX1|IKZF2|FOXO3|NR3C2|ING2|DBP|PITX2|SKIL|PITX3|ARG2|TLE1|KLF13|TSC22D1|TSC22D3|NFATC3|TFEB|NR1D2|KLF15|ACVR2B|MPP7|NFKBIA|PDP1|PER1|GNAL|RBL1|PER3|TEF|KLF9|PRKCQ
50794	0.00041615	0.042005	55	3912	83	8232	regulation of cellular process	ACHE|PLEKHF1|LDB1|MSTN|THRA|SIX1|STON2|IKZF2|NR3C2|ING2|CNST|DBP|SESN1|PDE4A|PITX2|EPHB1|PITX3|USP46|ARG2|TLE1|KLF13|TSC22D1|TSC22D3|GAB1|TFEB|ANK1|KLF15|DUSP7|RBL1|PRKCQ|SOS1|RASL12|CEBPB|HLF|ARHGAP18|FOXO3|TOB2|ABR|NPHP1|CHRNA10|SKIL|RBM38|ANGPT1|NFATC3|NR1D2|ACVR2B|MPP7|NFKBIA|PDP1|PER1|GNAL|PER3|TEF|KLF9|MAP6D1
9889	0.00045822	0.042005	34	1980	83	8232	regulation of biosynthetic process	CEBPB|HLF|LDB1|MSTN|THRA|SIX1|IKZF2|FOXO3|NR3C2|ING2|DBP|PITX2|SKIL|PITX3|ARG2|TLE1|KLF13|TSC22D1|TSC22D3|NFATC3|TFEB|NR1D2|KLF15|ACVR2B|MPP7|NFKBIA|PDP1|PER1|GNAL|RBL1|PER3|TEF|KLF9|PRKCQ
10557	0.00051679	0.042005	13	450	83	8232	positive regulation of macromolecule biosynthetic process	CEBPB|KLF13|HLF|MSTN|THRA|NFATC3|TFEB|SIX1|IKZF2|FOXO3|KLF15|NFKBIA|PRKCQ
45893	0.00056892	0.042005	11	340	83	8232	positive regulation of transcription, DNA-dependent	NFKBIA|CEBPB|KLF13|HLF|THRA|NFATC3|TFEB|SIX1|IKZF2|FOXO3|KLF15
45941	0.00057945	0.042005	12	397	83	8232	positive regulation of transcription	NFKBIA|CEBPB|KLF13|HLF|MSTN|THRA|NFATC3|TFEB|SIX1|IKZF2|FOXO3|KLF15
51254	0.00064283	0.042005	11	345	83	8232	positive regulation of RNA metabolic process	NFKBIA|CEBPB|KLF13|HLF|THRA|NFATC3|TFEB|SIX1|IKZF2|FOXO3|KLF15
10628	0.00067695	0.042005	12	404	83	8232	positive regulation of gene expression	NFKBIA|CEBPB|KLF13|HLF|MSTN|THRA|NFATC3|TFEB|SIX1|IKZF2|FOXO3|KLF15
48568	0.00070294	0.042005	6	107	83	8232	embryonic organ development	CEBPB|HLF|THRA|TFEB|SIX1|CHRNA10
32583	0.00072702	0.042005	7	149	83	8232	regulation of gene-specific transcription	NFKBIA|PER1|THRA|TFEB|IKZF2|FOXO3|SKIL
31328	0.00073327	0.042005	13	467	83	8232	positive regulation of cellular biosynthetic process	CEBPB|KLF13|HLF|MSTN|THRA|NFATC3|TFEB|SIX1|IKZF2|FOXO3|KLF15|NFKBIA|PRKCQ
65007	0.00078047	0.042005	58	4302	83	8232	biological regulation	ACHE|PLEKHF1|LDB1|MSTN|THRA|SIX1|AQP4|STON2|IKZF2|NR3C2|ING2|CNST|DBP|SESN1|PDE4A|PITX2|EPHB1|PITX3|USP46|ARG2|TLE1|KLF13|TSC22D1|TSC22D3|GAB1|TFEB|ANK1|KLF15|DUSP7|RBL1|PRKCQ|SOS1|RASL12|CEBPB|HLF|ARHGAP18|FOXO3|TOB2|ABR|SGPL1|NPHP1|CHRNA10|SKIL|RBM38|SLC12A2|ANGPT1|NFATC3|NR1D2|ACVR2B|MPP7|NFKBIA|PDP1|PER1|GNAL|PER3|TEF|KLF9|MAP6D1
9891	0.00080996	0.042005	13	472	83	8232	positive regulation of biosynthetic process	CEBPB|KLF13|HLF|MSTN|THRA|NFATC3|TFEB|SIX1|IKZF2|FOXO3|KLF15|NFKBIA|PRKCQ
50789	0.00089596	0.042005	56	4113	83	8232	regulation of biological process	ACHE|PLEKHF1|LDB1|MSTN|THRA|SIX1|STON2|IKZF2|NR3C2|ING2|CNST|DBP|SESN1|PDE4A|PITX2|EPHB1|PITX3|USP46|ARG2|TLE1|KLF13|TSC22D1|TSC22D3|GAB1|TFEB|ANK1|KLF15|DUSP7|RBL1|PRKCQ|SOS1|RASL12|CEBPB|HLF|ARHGAP18|FOXO3|TOB2|ABR|SGPL1|NPHP1|CHRNA10|SKIL|RBM38|ANGPT1|NFATC3|NR1D2|ACVR2B|MPP7|NFKBIA|PDP1|PER1|GNAL|PER3|TEF|KLF9|MAP6D1
44057	0.00091827	0.042005	7	155	83	8232	regulation of system process	USP46|ACHE|ARG2|HLF|MSTN|THRA|PRKCQ
7166	0.00097448	0.042005	15	608	83	8232	cell surface receptor linked signaling pathway	AMER1|SLC12A2|LDB1|MSTN|ANGPT1|DIXDC1|GAB1|ACVR2B|NFKBIA|SGPL1|GNAL|ITGB6|SOS1|EPHB1|LGR5
30878	0.00098483	0.042005	2	5	83	8232	thyroid gland development	THRA|SIX1
50974	0.00098483	0.042005	2	5	83	8232	detection of mechanical stimulus involved in sensory perception	SLC12A2|CHRNA10
51171	0.0010009	0.042005	33	1977	83	8232	regulation of nitrogen compound metabolic process	CEBPB|HLF|LDB1|MSTN|THRA|SIX1|IKZF2|FOXO3|NR3C2|ING2|DBP|PITX2|SKIL|PITX3|RBM38|ARG2|TLE1|KLF13|TSC22D1|TSC22D3|NFATC3|TFEB|NR1D2|KLF15|ACVR2B|MPP7|NFKBIA|PER1|GNAL|RBL1|PER3|TEF|KLF9
45449	0.0010514	0.042653	30	1732	83	8232	regulation of transcription	CEBPB|HLF|LDB1|MSTN|THRA|SIX1|IKZF2|FOXO3|NR3C2|ING2|DBP|PITX2|SKIL|PITX3|TLE1|KLF13|TSC22D1|TSC22D3|NFATC3|TFEB|NR1D2|KLF15|ACVR2B|MPP7|NFKBIA|PER1|RBL1|PER3|TEF|KLF9
45638	0.0011531	0.045268	3	21	83	8232	negative regulation of myeloid cell differentiation	NFKBIA|LDB1|TOB2

## Sheet: Young CON vs. Older CON (BP)
GO-ID	P-raw	P-corrected	Observed DE genes	Total genes in GO-ID	Total DE genes in GO analysis	Total genes in GO	GO description	Genes in test set
Up-regulated 5 h post-CON in young and older muscle:
Unique young:
3008	0.00027816	0.047547	5	505	11	8298	system process	GDNF|AKR1C1|SLMAP|FOS|ANKRD2
6936	0.00045819	0.047547	3	121	11	8298	muscle contraction	GDNF|SLMAP|ANKRD2
3012	0.00059135	0.047547	3	132	11	8298	muscle system process	GDNF|SLMAP|ANKRD2
45893	0.00075964	0.047547	4	344	11	8298	positive regulation of transcription, DNA-dependent	MYOG|GDNF|ESRRG|FOS
51254	0.0008022	0.047547	4	349	11	8298	positive regulation of RNA metabolic process	MYOG|GDNF|ESRRG|FOS
10604	0.00099302	0.047547	5	664	11	8298	positive regulation of macromolecule metabolic process	MYOG|GDNF|SMURF1|ESRRG|FOS
31325	0.001078	0.047547	5	676	11	8298	positive regulation of cellular metabolic process	MYOG|GDNF|SMURF1|ESRRG|FOS
9893	0.0012646	0.047547	5	700	11	8298	positive regulation of metabolic process	MYOG|GDNF|SMURF1|ESRRG|FOS
70884	0.0013256	0.047547	1	1	11	8298	regulation of calcineurin-NFAT signaling pathway	LMCD1
70886	0.0013256	0.047547	1	1	11	8298	positive regulation of calcineurin-NFAT signaling pathway	LMCD1
1661	0.0013256	0.047547	1	1	11	8298	conditioned taste aversion	FOS
45941	0.0013517	0.047547	4	401	11	8298	positive regulation of transcription	MYOG|GDNF|ESRRG|FOS
10628	0.0014419	0.047547	4	408	11	8298	positive regulation of gene expression	MYOG|GDNF|ESRRG|FOS
9636	0.0014662	0.047547	2	44	11	8298	response to toxin	AKR1C1|FOS
Unique elderly:
30199	2.8133e-07	0.00034434	6	22	109	8298	collagen fibril organization	ADAMTS2|COL3A1|COL1A2|LOX|COL5A1|COL5A3
30198	4.0796e-06	0.0017051	8	72	109	8298	extracellular matrix organization	ADAMTS2|COL3A1|COL1A2|LOX|COL5A1|COL5A3|COL4A3|PXDN
43062	4.1791e-06	0.0017051	9	96	109	8298	extracellular structure organization	ADAMTS2|COL3A1|COL1A2|LOX|COL5A1|COL5A3|COL4A3|PXDN|TNC
43588	6.1382e-06	0.0018783	5	21	109	8298	skin development	ADAMTS2|COL3A1|COL1A2|COL5A1|COL5A3
1568	1.826e-05	0.00447	12	210	109	8298	blood vessel development	CDH5|MYO1E|ROBO4|COL3A1|COL1A2|PLXND1|LOX|COL5A1|ECSCR|BGN|THY1|ELK3
1944	2.3102e-05	0.0047129	12	215	109	8298	vasculature development	CDH5|MYO1E|ROBO4|COL3A1|COL1A2|PLXND1|LOX|COL5A1|ECSCR|BGN|THY1|ELK3
22610	0.0002117	0.03239	14	355	109	8298	biological adhesion	SRPX|VCAM1|FBLIM1|ITGA3|ITGA1|TNC|THY1|CDH5|CLDN5|VCAN|COL3A1|COL5A1|COL5A3|COL4A3
7155	0.0002117	0.03239	14	355	109	8298	cell adhesion	SRPX|VCAM1|FBLIM1|ITGA3|ITGA1|TNC|THY1|CDH5|CLDN5|VCAN|COL3A1|COL5A1|COL5A3|COL4A3
Common to young and elderly:
32502	9.6124e-06	0.014005	43	1852	104	8298	developmental process	CDKN1A|DGKD|SDC4|ELN|WIPF3|ETS2|CYR61|ERO1L|SYNE1|ARVCF|ZMIZ1|MYC|XIRP1|RICTOR|PCNT|IL6R|PPARGC1A|SOCS7|SH2B3|TP63|EGR1|TGFB2|TNFRSF12A|SORT1|IFRD1|CRIM1|EIF2AK3|ACSL3|SYNJ2|NFKB2|NR4A3|NEDD4|MAFF|PMP22|KCNQ4|ANGPTL2|ALPK3|SIK1|CSPG4|MAFK|VGLL2|HBEGF|LIMS1
32501	3.7188e-05	0.027091	45	2085	104	8298	multicellular organismal process	CDKN1A|DGKD|SDC4|ELN|WIPF3|ETS2|CYR61|FAM134B|SDCBP|ARVCF|ZMIZ1|MYC|XIRP1|RICTOR|IL6R|PPARGC1A|SH2B3|TP63|IL12RB2|EGR1|TGFB2|TNFRSF12A|IL1R1|SORT1|IFRD1|CRIM1|EIF2AK3|ACSL3|SYNJ2|NFKB2|DIAPH1|CLCN5|NR4A3|NEDD4|MAFF|PPAP2A|PMP22|KCNQ4|ANGPTL2|ALPK3|SIK1|CSPG4|MAFK|VGLL2|HBEGF
Down-regulated 5 h post-CON in young and elderly muscle:
Unique young:
60012	0.00024102	0.0089178	1	2	1	8298	synaptic transmission, glycinergic	GLRB
1964	0.00036153	0.0089178	1	3	1	8298	startle response	GLRB
60013	0.00036153	0.0089178	1	3	1	8298	righting reflex	GLRB
7340	0.00048204	0.0089178	1	4	1	8298	acrosome reaction	GLRB
60004	0.00072307	0.010701	1	6	1	8298	reflex	GLRB
17156	0.00096409	0.01189	1	8	1	8298	calcium ion-dependent exocytosis	GLRB
7628	0.0012051	0.012262	1	10	1	8298	adult walking behavior	GLRB
7270	0.0013256	0.012262	1	11	1	8298	nerve-nerve synaptic transmission	GLRB
7338	0.0021692	0.016052	1	18	1	8298	single fertilization	GLRB
7218	0.0021692	0.016052	1	18	1	8298	neuropeptide signaling pathway	GLRB
9566	0.0027718	0.017836	1	23	1	8298	fertilization	GLRB
50905	0.0028923	0.017836	1	24	1	8298	neuromuscular process	GLRB
8344	0.0033743	0.019208	1	28	1	8298	adult locomotory behavior	GLRB
30534	0.0042179	0.022295	1	35	1	8298	adult behavior	GLRB
51291	0.0050615	0.02497	1	42	1	8298	protein heterooligomerization	GLRB
6887	0.0079537	0.035147	1	66	1	8298	exocytosis	GLRB
42391	0.0080742	0.035147	1	67	1	8298	regulation of membrane potential	GLRB
50953	0.0092793	0.036141	1	77	1	8298	sensory perception of light stimulus	GLRB
7601	0.0092793	0.036141	1	77	1	8298	visual perception	GLRB
48610	0.010243	0.037901	1	85	1	8298	reproductive cellular process	GLRB
7268	0.012413	0.04374	1	103	1	8298	synaptic transmission	GLRB
32940	0.013136	0.043814	1	109	1	8298	secretion by cell	GLRB
7626	0.013618	0.043814	1	113	1	8298	locomotory behavior	GLRB
19226	0.015666	0.045545	1	130	1	8298	transmission of nerve impulse	GLRB
7186	0.015907	0.045545	1	132	1	8298	G-protein coupled receptor protein signaling pathway	GLRB
46903	0.016269	0.045545	1	135	1	8298	secretion	GLRB
7600	0.016751	0.045545	1	139	1	8298	sensory perception	GLRB
51259	0.017233	0.045545	1	143	1	8298	protein oligomerization	GLRB
Unique elderly:
16054	2.2119e-05	0.0032736	4	80	18	8298	organic acid catabolic process	ALDH6A1|ECH1|ETFDH|BCAT2
46395	2.2119e-05	0.0032736	4	80	18	8298	carboxylic acid catabolic process	ALDH6A1|ECH1|ETFDH|BCAT2
9083	0.00028959	0.028573	2	12	18	8298	branched chain family amino acid catabolic process	ALDH6A1|BCAT2
44282	0.00050561	0.031011	4	179	18	8298	small molecule catabolic process	ALDH6A1|ECH1|ETFDH|BCAT2
9081	0.00052383	0.031011	2	16	18	8298	branched chain family amino acid metabolic process	ALDH6A1|BCAT2
6082	0.00091921	0.045348	5	371	18	8298	organic acid metabolic process	ALDH6A1|TST|ECH1|ETFDH|BCAT2
6635	0.0017429	0.045957	2	29	18	8298	fatty acid beta-oxidation	ECH1|ETFDH
19482	0.0021692	0.045957	1	1	18	8298	beta-alanine metabolic process	ALDH6A1
19484	0.0021692	0.045957	1	1	18	8298	beta-alanine catabolic process	ALDH6A1
42732	0.0021692	0.045957	1	1	18	8298	D-xylose metabolic process	DCXR
5997	0.0021692	0.045957	1	1	18	8298	xylulose metabolic process	DCXR
6574	0.0021692	0.045957	1	1	18	8298	valine catabolic process	ALDH6A1
34440	0.0023929	0.045957	2	34	18	8298	lipid oxidation	ECH1|ETFDH
19395	0.0023929	0.045957	2	34	18	8298	fatty acid oxidation	ECH1|ETFDH
9062	0.0028299	0.045957	2	37	18	8298	fatty acid catabolic process	ECH1|ETFDH
9063	0.0036351	0.045957	2	42	18	8298	cellular amino acid catabolic process	ALDH6A1|BCAT2
45072	0.004334	0.045957	1	2	18	8298	regulation of interferon-gamma biosynthetic process	CEBPG
45078	0.004334	0.045957	1	2	18	8298	positive regulation of interferon-gamma biosynthetic process	CEBPG
46113	0.004334	0.045957	1	2	18	8298	nucleobase catabolic process	ALDH6A1
6208	0.004334	0.045957	1	2	18	8298	pyrimidine base catabolic process	ALDH6A1
6210	0.004334	0.045957	1	2	18	8298	thymine catabolic process	ALDH6A1
9439	0.004334	0.045957	1	2	18	8298	cyanate metabolic process	TST
9440	0.004334	0.045957	1	2	18	8298	cyanate catabolic process	TST
9082	0.004334	0.045957	1	2	18	8298	branched chain family amino acid biosynthetic process	BCAT2
9098	0.004334	0.045957	1	2	18	8298	leucine biosynthetic process	BCAT2
19859	0.004334	0.045957	1	2	18	8298	thymine metabolic process	ALDH6A1
6550	0.004334	0.045957	1	2	18	8298	isoleucine catabolic process	BCAT2
44270	0.0043473	0.045957	2	46	18	8298	cellular nitrogen compound catabolic process	ALDH6A1|TST
Common to young and elderly:
48511	1.0097e-08	8.2795e-06	7	80	30	8298	rhythmic process	PER1|HLF|DBP|PER3|MSTN|ANGPT1|TEF
65007	1.2032e-05	0.0049331	27	4339	30	8298	biological regulation	RASL12|HLF|MSTN|CDCA7L|AQP4|TOB2|NR3C2|SGPL1|DBP|NPHP1|SKIL|PITX3|SLC12A2|ANGPT1|MID1IP1|GAB1|NR1D2|ACVR2B|MPP7|DUSP7|GADD45G|NFKBIA|PDP1|PER1|PER3|TEF|TRIB1
19222	7.9763e-05	0.020394	20	2618	30	8298	regulation of metabolic process	HLF|MSTN|ANGPT1|CDCA7L|NR1D2|TOB2|ACVR2B|MPP7|NR3C2|DUSP7|GADD45G|NFKBIA|PDP1|PER1|DBP|PER3|TEF|TRIB1|SKIL|PITX3
50896	9.9482e-05	0.020394	16	1750	30	8298	response to stimulus	SLC12A2|HLF|MSTN|ANGPT1|GAB1|AQP4|ACVR2B|MPP7|GADD45G|NFKBIA|PER1|NPHP1|ITGB6|TRIB1|SKIL|PITX3
50789	0.00015791	0.023261	25	4148	30	8298	regulation of biological process	RASL12|HLF|MSTN|CDCA7L|TOB2|NR3C2|SGPL1|DBP|NPHP1|SKIL|PITX3|ANGPT1|MID1IP1|GAB1|NR1D2|ACVR2B|MPP7|DUSP7|GADD45G|NFKBIA|PDP1|PER1|PER3|TEF|TRIB1
31323	0.0001702	0.023261	19	2502	30	8298	regulation of cellular metabolic process	HLF|MSTN|ANGPT1|CDCA7L|NR1D2|ACVR2B|MPP7|NR3C2|DUSP7|GADD45G|NFKBIA|PDP1|PER1|DBP|PER3|TEF|TRIB1|SKIL|PITX3
50794	0.00027253	0.031925	24	3946	30	8298	regulation of cellular process	RASL12|HLF|MSTN|ANGPT1|CDCA7L|MID1IP1|GAB1|NR1D2|TOB2|ACVR2B|MPP7|NR3C2|DUSP7|GADD45G|NFKBIA|PDP1|PER1|DBP|PER3|TEF|NPHP1|TRIB1|SKIL|PITX3
45449	0.00042547	0.039532	15	1754	30	8298	regulation of transcription	HLF|MSTN|CDCA7L|NR1D2|ACVR2B|MPP7|NR3C2|NFKBIA|PER1|DBP|PER3|TEF|TRIB1|SKIL|PITX3
10468	0.00046426	0.039532	16	1982	30	8298	regulation of gene expression	HLF|MSTN|CDCA7L|NR1D2|TOB2|ACVR2B|MPP7|NR3C2|NFKBIA|PER1|DBP|PER3|TEF|TRIB1|SKIL|PITX3
31326	0.00049332	0.039532	16	1992	30	8298	regulation of cellular biosynthetic process	HLF|MSTN|CDCA7L|NR1D2|ACVR2B|MPP7|NR3C2|NFKBIA|PDP1|PER1|DBP|PER3|TEF|TRIB1|SKIL|PITX3
9889	0.0005303	0.039532	16	2004	30	8298	regulation of biosynthetic process	HLF|MSTN|CDCA7L|NR1D2|ACVR2B|MPP7|NR3C2|NFKBIA|PDP1|PER1|DBP|PER3|TEF|TRIB1|SKIL|PITX3
10033	0.00063454	0.04336	8	560	30	8298	response to organic substance	NFKBIA|MSTN|ANGPT1|GAB1|AQP4|TRIB1|SKIL|ACVR2B

## Sheet: Young ECC vs. Older ECC (BP)
GO-ID	P-raw	P-corrected	Observed DE genes	Total genes in GO-ID	Total DE genes in GO analysis	Total genes in GO	GO description	Genes in test set
Up-regulated 5 h post-ECC in young and older muscle:
Unique young:
No enriched GO terms identified
Unique elderly:
No enriched GO terms identified
Common to young and elderly:
50794	4.5173e-08	0.00011076	203	3841	326	8058	regulation of cellular process	ATF1|ERRFI1|HNRNPU|JMJD1C|GABPB1|BACH1|BACH2|ABRA|NUDT4|MYC|RASSF5|JUNB|SOX4|IER3|IL1R1|STARD8|ACTN1|DAPK3|FNDC3B|KCNQ4|SIK1|SIK2|TP53|ATF3|SDC4|RRAD|ARPP19|TP53BP2|PPARGC1A|SRPK2|EGR1|JUND|GADD45B|GADD45A|PLK2|EAF1|EIF2AK3|RASSF8|CYLD|FUBP1|STRN|PKIG|CSRNP1|CDKN1A|CITED2|PRKAG2|ADM|SHB|PANX1|HEY1|ANKRD1|TIMP1|JAK2|LMCD1|MCF2L2|EDARADD|MYOG|ANXA2|TNFRSF12A|TSC22D2|RRAS2|AEN|FOS|DUSP8|OSMR|PPRC1|S…
50789	1.4376e-07	0.00017625	209	4039	326	8058	regulation of biological process	ATF1|ERRFI1|HNRNPU|JMJD1C|GABPB1|BACH1|BACH2|ABRA|NUDT4|MYC|RASSF5|JUNB|SOX4|IER3|IL1R1|STARD8|ACTN1|DAPK3|FNDC3B|KCNQ4|SIK1|SIK2|TP53|ATF3|SLC22A5|SDC4|RRAD|ARPP19|TP53BP2|PPARGC1A|SRPK2|EGR1|JUND|GADD45B|GADD45A|PLK2|EAF1|EIF2AK3|RASSF8|CYLD|FUBP1|STRN|PKIG|CSRNP1|CDKN1A|CITED2|PRKAG2|ADM|SHB|PANX1|CSRP3|HEY1|ANKRD1|TIMP1|JAK2|LMCD1|MCF2L2|EDARADD|MYOG|ANXA2|TNFRSF12A|TSC22D2|RRAS2|AEN|FOS|DUSP…
65007	2.6155e-07	0.00019347	215	4217	326	8058	biological regulation	ATF1|ERRFI1|HNRNPU|JMJD1C|GABPB1|BACH1|BACH2|ABRA|NUDT4|MYC|RASSF5|JUNB|SOX4|IER3|IL1R1|STARD8|ACTN1|DAPK3|FNDC3B|KCNQ4|SIK1|SIK2|TP53|ATF3|SLC22A5|SDC4|RRAD|ARPP19|TP53BP2|PPARGC1A|SRPK2|EGR1|JUND|GADD45B|GADD45A|PLK2|EAF1|EIF2AK3|RASSF8|CYLD|FUBP1|STRN|PKIG|CSRNP1|CDKN1A|CITED2|PRKAG2|ADM|SHB|PANX1|CSRP3|HEY1|ANKRD1|TNKS1BP1|TIMP1|JAK2|LMCD1|MCF2L2|EDARADD|MYOG|ANXA2|TNFRSF12A|TSC22D2|RRAS2|AEN…
48646	3.1561e-07	0.00019347	30	267	326	8058	anatomical structure formation involved in morphogenesis	ATF1|CITED2|ADM|SHB|CYR61|ADAMTS1|PLAU|ZC3H12A|XIRP1|JUNB|NKX3-1|SPEN|TGFB2|RBM15|ANXA2|TNFRSF12A|TBX3|VEGFA|ALDH1A3|KLF5|NR4A3|ACTC1|MYH9|CSPG4|ANXA2P2|NAA15|TP53|CD44|BMPR1A|FGFR1
23052	9.0555e-07	0.00043651	104	1670	326	8058	signaling	ATF1|DGKD|IRS2|BACH1|ERO1L|NUDT4|PLAU|RASSF5|IL6R|SOX4|MAP2K3|TLE4|IL1R1|STARD8|DAPK3|ARID5B|SIK1|SIK2|TP53|XPR1|RRAD|ARHGAP17|CORO1C|SDCBP|TP53BP2|SOCS6|PPARGC1A|SOCS7|SRPK2|TGFB2|GADD45B|HSPA5|HOMER2|EIF2AK3|RASSF8|NFKB2|CYLD|BCL9|RCAN1|CDK4|DLG5|STRN|PI4KB|PKIG|BMPR1A|FGFR1|CSRNP1|GPSM2|CDKN1A|PRKAG2|ADM|SHB|DUSP16|RND3|PANX1|DUSP10|HEY1|YWHAQ|ADAMTS1|ANKRD1|ITGAV|JAK2|PRKG1|EDARADD|RBM15|PDE4…
23033	1.0681e-06	0.00043651	80	1181	326	8058	signaling pathway	CSRNP1|GPSM2|CDKN1A|DGKD|PRKAG2|ADM|IRS2|BACH1|DUSP16|RND3|ERO1L|NUDT4|DUSP10|HEY1|YWHAQ|ADAMTS1|ITGAV|JAK2|IL6R|SOX4|TLE4|RBM15|IL1R1|DAPK3|RRAS2|ARID5B|AEN|FOS|DUSP8|TNFRSF1B|OSMR|PPAP2A|RARA|MYH9|SIK1|SIK2|CRYAB|TP53|XPR1|HBEGF|RRAD|RAB21|PPP2CA|SDCBP|SOCS6|PPARGC1A|SOCS7|CTNNAL1|SH2B3|IL12RB2|SRPK2|SPEN|TGFB2|ANGPT2|GADD45B|HSPA5|HOMER2|CSNK1A1|SORT1|EIF2AK3|USP28|VEGFA|DNAJA1|CYLD|HEYL|BCL9|…
42221	2.0411e-06	0.00070138	63	867	326	8058	response to chemical stimulus	ATF1|CDKN1A|DGKD|SRXN1|CITED2|HSPB7|HSPB1|ADM|IRS2|PRDM2|CYR61|ERO1L|PANX1|THBD|PLAU|MYC|PIM1|JAK2|JUNB|IL6R|TPM4|IL1R1|TRAFD1|FOS|ACSL3|OSMR|ETV5|ALDH1A3|RARA|ANGPTL2|CRYAB|TP53|CD44|SLC22A5|ATP1A1|HDAC9|PPP2CA|PPP2CB|MAT2A|DNAJB5|DNAJB4|STX3|SOCS7|IL12RB2|AKIRIN2|EGR1|PRNP|EGLN3|TGFB2|ANGPT2|HSPA1L|HSPA5|SORT1|EIF2AK3|VEGFA|DNAJA1|NR4A3|ACTC1|CDK4|NEDD4|HSPA1B|BCAR1|HSPA1A
48518	2.3178e-06	0.00070138	90	1408	326	8058	positive regulation of biological process	ATF1|CSRNP1|CDKN1A|CITED2|PRKAG2|ADM|IRS2|LAMC1|GABPB1|PVR|CYR61|ABRA|ETS2|PANX1|THBD|MYC|PIM1|TIMP1|JAK2|JUNB|LMCD1|IL6R|SOX4|MYOG|MAP2K3|RBM15|ANXA2|TNFRSF12A|DAPK3|FNDC3B|RRAS2|AEN|FOS|OSMR|SIRT1|ALDH1A3|RARA|ANGPTL2|VGLL2|TP53|ATF3|CD44|CHST3|HBEGF|PSMD12|SLC22A5|SDC4|NOP2|ATP1A1|ARPP19|HDAC9|ARNTL|PPP2CA|SERTAD1|TP53BP2|RICTOR|E2F3|PPARGC1A|EIF4E|IL12RB2|SPAG9|SPEN|ZNF462|AKIRIN2|EGR1|TGFB2|…
48519	2.5744e-06	0.00070138	86	1329	326	8058	negative regulation of biological process	ATF1|ERRFI1|CDKN1A|CITED2|HSPB1|TNFAIP3|ADM|IRS2|THBD|HEY1|YWHAQ|ADAMTS1|PLAU|MYC|PIM1|ITGAV|TIMP1|JAK2|LMCD1|IL6R|SOX4|IER3|NKX3-1|RBM15|ANXA2|DYNLT1|FBXW7|ACTN1|ARID5A|TRAFD1|ARID5B|TNFRSF1B|SIRT1|PPAP2A|RARA|ANGPTL2|KCNQ4|SIK1|MAPRE1|CRYAB|TP53|CD44|HBEGF|PSMD12|RRAD|ABHD2|ATP1A1|HDAC9|PPP2CA|PPP2CB|BAG3|DNAJB5|XIRP1|TP53BP2|SOCS6|SRSF10|SOCS7|SPEN|AKIRIN2|HHATL|PTPN1|EGR1|PRNP|TGFB2|ANGPT2|HS…
51789	4.1008e-06	0.0010055	15	93	326	8058	response to protein stimulus	EGR1|ANGPT2|HSPA1L|HSPA5|HSPB7|EIF2AK3|HSPB1|FOS|CYR61|ERO1L|DNAJA1|DNAJB5|DNAJB4|HSPA1B|HSPA1A
48522	4.9633e-06	0.0011064	84	1309	326	8058	positive regulation of cellular process	ATF1|CSRNP1|CDKN1A|CITED2|PRKAG2|ADM|IRS2|LAMC1|GABPB1|CYR61|ABRA|ETS2|PANX1|MYC|PIM1|TIMP1|JAK2|JUNB|LMCD1|IL6R|SOX4|MYOG|MAP2K3|RBM15|ANXA2|TNFRSF12A|DAPK3|FNDC3B|RRAS2|AEN|FOS|OSMR|SIRT1|ALDH1A3|RARA|VGLL2|TP53|ATF3|CD44|CHST3|HBEGF|PSMD12|SDC4|NOP2|ARPP19|HDAC9|ARNTL|PPP2CA|SERTAD1|TP53BP2|RICTOR|E2F3|PPARGC1A|EIF4E|IL12RB2|SPAG9|SPEN|ZNF462|AKIRIN2|EGR1|TGFB2|JUND|HSPA5|SORT1|PLK2|EIF2AK3|SA…
9266	5.4802e-06	0.0011198	12	62	326	8058	response to temperature stimulus	DNAJA1|HSPA1L|DNAJA4|DNAJB4|HSPB8|HSPB7|HSPB1|ADM|FOS|CRYAB|ERO1L|VEGFA
48523	6.5405e-06	0.0012336	80	1236	326	8058	negative regulation of cellular process	ATF1|ERRFI1|CDKN1A|CITED2|HSPB1|TNFAIP3|ADM|IRS2|THBD|HEY1|YWHAQ|ADAMTS1|MYC|PIM1|ITGAV|TIMP1|JAK2|LMCD1|SOX4|IER3|NKX3-1|RBM15|DYNLT1|FBXW7|ACTN1|ARID5A|ARID5B|SIRT1|PPAP2A|RARA|ANGPTL2|KCNQ4|SIK1|MAPRE1|CRYAB|TP53|CD44|HBEGF|PSMD12|RRAD|ABHD2|ATP1A1|HDAC9|PPP2CA|PPP2CB|BAG3|DNAJB5|XIRP1|TP53BP2|SOCS6|SRSF10|SOCS7|SPEN|AKIRIN2|HHATL|PTPN1|EGR1|PRNP|TGFB2|ANGPT2|HSPA5|GADD45A|SORT1|EIF2AK3|HNRNPA…
10033	8.1324e-06	0.0014243	44	549	326	8058	response to organic substance	ATF1|CDKN1A|DGKD|HSPB7|HSPB1|ADM|IRS2|PRDM2|HDAC9|CYR61|ERO1L|PANX1|PPP2CA|THBD|MAT2A|DNAJB5|DNAJB4|JAK2|JUNB|SOCS7|IL6R|IL12RB2|AKIRIN2|EGR1|TGFB2|ANGPT2|HSPA1L|HSPA5|IL1R1|SORT1|EIF2AK3|TRAFD1|FOS|ACSL3|OSMR|DNAJA1|NR4A3|ACTC1|RARA|CRYAB|HSPA1B|BCAR1|CD44|HSPA1A
1944	9.572e-06	0.0015647	23	207	326	8058	vasculature development	SPEN|ERRFI1|TGFB2|RBM15|ANXA2|TNFRSF12A|CITED2|SHB|CYR61|TBX3|VEGFA|CSRP3|KLF5|PLAU|ZC3H12A|MYH9|CSPG4|ITGAV|ANXA2P2|NAA15|JUNB|CD44|FGFR1
48513	1.1468e-05	0.0017575	67	992	326	8058	organ development	ATF1|ERRFI1|CSRNP1|CDKN1A|CITED2|ADM|IRS2|LAMC1|SHB|CYR61|CSRP3|HEY1|ADAMTS1|PLAU|MYC|ZC3H12A|ITGAV|TIMP1|JAK2|JUNB|IL6R|SOX4|NKX3-1|EDARADD|MYOG|RBM15|ANXA2|TNFRSF12A|ARID5B|ACSL3|SIRT1|ALDH1A3|KCNQ4|MYH9|ALPK3|VGLL2|CRYAB|TP53|CD44|HBEGF|HDAC9|PPP2CA|UGCG|XIRP1|SH2B3|SPEN|EGR1|TGFB2|ANGPT2|HSPA5|EIF2AK3|SYNJ2|HNRNPAB|TBX3|NFKB2|VEGFA|RCAN1|KLF6|KLF5|NR4A3|ACTC1|CSPG4|ANXA2P2|NAA15|DFNA5|BMPR1A|…
1525	1.9448e-05	0.0028051	16	118	326	8058	angiogenesis	SPEN|TGFB2|RBM15|ANXA2|TNFRSF12A|SHB|CYR61|VEGFA|KLF5|PLAU|ZC3H12A|MYH9|CSPG4|ANXA2P2|NAA15|FGFR1
1568	2.0602e-05	0.0028064	22	202	326	8058	blood vessel development	SPEN|TGFB2|RBM15|ANXA2|TNFRSF12A|CITED2|SHB|CYR61|TBX3|VEGFA|CSRP3|KLF5|PLAU|ZC3H12A|MYH9|CSPG4|ITGAV|ANXA2P2|NAA15|JUNB|CD44|FGFR1
32502	2.4969e-05	0.0032223	104	1792	326	8058	developmental process	ATF1|ERRFI1|DGKD|WIPF3|IRS2|ETS2|ERO1L|LOXL2|PLAU|MYC|ZC3H12A|PIM1|JUNB|IL6R|SOX4|IER3|DAPK3|IFRD1|DYRK1A|ARID5B|ACSL3|KCNQ4|ALPK3|SIK1|TP53|SDC4|UGCG|PPARGC1A|SOCS7|SRPK2|AKIRIN2|EGR1|TGFB2|JUND|GADD45B|HSPA5|EIF2AK3|CRIM1|SYNJ2|NFKB2|RCAN1|NR4A3|MAFF|STRN|CSPG4|MAFK|ANXA2P2|MXD1|BMPR1A|FGFR1|CSRNP1|CDKN1A|CITED2|MAST2|ADM|LAMC1|SHB|CYR61|THBD|CSRP3|HEY1|ADAMTS1|ITGAV|TIMP1|JAK2|NKX3-1|EDARADD|M…
7275	3.4126e-05	0.0041838	96	1631	326	8058	multicellular organismal development	ATF1|ERRFI1|CSRNP1|CDKN1A|DGKD|CITED2|WIPF3|ADM|IRS2|LAMC1|SHB|CYR61|ETS2|THBD|CSRP3|HEY1|ADAMTS1|PLAU|MYC|ZC3H12A|PIM1|ITGAV|TIMP1|JAK2|JUNB|IL6R|SOX4|NKX3-1|EDARADD|MYOG|RBM15|ANXA2|TNFRSF12A|DYNLT1|DAPK3|IFRD1|DYRK1A|ARID5B|FOS|ACSL3|SIRT1|UGDH|ALDH1A3|ANGPTL2|KCNQ4|MYH9|ALPK3|SIK1|VGLL2|CRYAB|TP53|CD44|CHST3|HBEGF|SDC4|HDAC9|PPP2CA|UGCG|ARVCF|XIRP1|RICTOR|STX3|SH2B3|SPEN|AKIRIN2|EGR1|TGFB2|JU…
6986	3.7466e-05	0.0043746	11	63	326	8058	response to unfolded protein	DNAJA1|HSPA1L|HSPA5|DNAJB5|DNAJB4|HSPB7|EIF2AK3|HSPB1|HSPA1B|HSPA1A|ERO1L
48514	4.9005e-05	0.0054618	19	169	326	8058	blood vessel morphogenesis	SPEN|TGFB2|RBM15|ANXA2|TNFRSF12A|CITED2|SHB|CYR61|VEGFA|CSRP3|KLF5|PLAU|ZC3H12A|MYH9|CSPG4|ANXA2P2|NAA15|JUNB|FGFR1
48731	5.9498e-05	0.006343	81	1333	326	8058	system development	ATF1|ERRFI1|CSRNP1|CDKN1A|CITED2|ADM|IRS2|LAMC1|SHB|CYR61|ETS2|CSRP3|HEY1|ADAMTS1|PLAU|MYC|ZC3H12A|ITGAV|TIMP1|JAK2|JUNB|IL6R|SOX4|NKX3-1|EDARADD|MYOG|RBM15|ANXA2|TNFRSF12A|DYNLT1|DAPK3|DYRK1A|ARID5B|FOS|ACSL3|SIRT1|ALDH1A3|KCNQ4|MYH9|ALPK3|VGLL2|CRYAB|TP53|CD44|CHST3|HBEGF|HDAC9|PPP2CA|UGCG|XIRP1|STX3|SH2B3|SPEN|EGR1|TGFB2|JUND|ANGPT2|HSPA5|SORT1|EIF2AK3|CRIM1|SYNJ2|HNRNPAB|TBX3|NFKB2|VEGFA|HEYL…
42730	6.5634e-05	0.0066205	3	3	326	8058	fibrinolysis	ANXA2|PLAU|ANXA2P2
32501	6.7501e-05	0.0066205	112	2011	326	8058	multicellular organismal process	ATF1|ERRFI1|DGKD|WIPF3|IRS2|ETS2|PLAU|MYC|ZC3H12A|PIM1|JUNB|IL6R|SOX4|TPM4|IL1R1|DAPK3|IFRD1|DYRK1A|ARID5B|ACSL3|KCNQ4|ALPK3|SIK1|TP53|SDC4|UGCG|SDCBP|PPARGC1A|AKIRIN2|EGR1|TGFB2|JUND|GADD45B|HSPA5|EIF2AK3|CRIM1|SYNJ2|NFKB2|RCAN1|DIAPH1|NR4A3|MAFF|STRN|CSPG4|MAFK|ANXA2P2|MXD1|BMPR1A|FGFR1|CSRNP1|CDKN1A|WDR1|CITED2|MAST2|ADM|LAMC1|SHB|CYR61|THBD|CSRP3|HEY1|ADAMTS1|ITGAV|TIMP1|JAK2|NKX3-1|EDARADD|M…
9628	8.9324e-05	0.008424	23	238	326	8058	response to abiotic stimulus	CDKN1A|ANGPT2|HSPA1L|HSPB8|HSPB7|HSPB1|ADM|AEN|FOS|USP28|ERO1L|VEGFA|DNAJA1|THBD|SNN|MAT2A|DNAJA4|DNAJB4|NEDD4|JUNB|CRYAB|TP53|IL6R
8284	9.5415e-05	0.0086651	24	255	326	8058	positive regulation of cell proliferation	AKIRIN2|CDKN1A|TGFB2|NOP2|ADM|IRS2|LAMC1|OSMR|TBX3|VEGFA|KLF5|SERTAD1|CDK4|MYC|RARA|E2F3|TIMP1|JAK2|IL6R|ATF3|SOX4|IL12RB2|BMPR1A|FGFR1
42127	0.00014974	0.012718	38	507	326	8058	regulation of cell proliferation	CDKN1A|NOP2|ADM|IRS2|LAMC1|SERTAD1|ADAMTS1|PLAU|MYC|XIRP1|E2F3|TIMP1|JAK2|IL6R|SOX4|IL12RB2|NKX3-1|AKIRIN2|EGLN3|TGFB2|OSMR|SIRT1|TBX3|GNL3|VEGFA|KLF5|CDK4|DLG5|ABI1|PPAP2A|RARA|STRN|TP53|ATF3|HSPA1B|HSPA1A|BMPR1A|FGFR1
7165	0.0001539	0.012718	66	1056	326	8058	signal transduction	ATF1|GPSM2|CDKN1A|DGKD|PRKAG2|ADM|IRS2|SHB|BACH1|DUSP16|RND3|NUDT4|DUSP10|YWHAQ|PLAU|RASSF5|ANKRD1|JAK2|IL6R|PRKG1|EDARADD|MAP2K3|IL1R1|STARD8|PDE4D|DAPK3|RRAS2|PPP2R5A|FOS|DUSP8|RARA|ANGPTL2|SIK1|SIK2|CRYAB|TP53|TRIM55|HBEGF|RRAD|ARHGAP17|CORO1C|RAB21|PPP2CA|SDCBP|TP53BP2|SOCS6|CTNNAL1|SRPK2|PTPN1|ANGPT2|GADD45B|CSNK1A1|EIF2AK3|RASSF8|USP28|NFKB2|RCAN1|KLF6|CDK4|RAB15|STK17A|STK17B|DLG5|PI4KB|PK…
2053	0.0001556	0.012718	5	14	326	8058	positive regulation of mesenchymal cell proliferation	MYC|IRS2|VEGFA|BMPR1A|FGFR1
43066	0.00019899	0.015381	23	251	326	8058	negative regulation of apoptosis	ATF1|PRNP|CDKN1A|HSPA5|CITED2|SORT1|HSPB1|TNFAIP3|IRS2|TBX3|VEGFA|PPP2CB|BAG3|PIM1|ANGPTL2|CRYAB|TP53|HSPA1B|SOX4|CD44|IER3|HSPA1A|FGFR1
51241	0.00020252	0.015381	12	88	326	8058	negative regulation of multicellular organismal process	THBD|ANXA2|PLAU|EIF2AK3|RARA|KCNQ4|ADM|ANXA2P2|ATP1A1|JAK2|IL6R|VEGFA
6468	0.00020898	0.015381	33	424	326	8058	protein amino acid phosphorylation	CDKN1A|SMG1|MAST4|MAST2|PIM1|JAK2|PRKG1|IL12RB2|MAP2K3|SRPK2|TGFB2|GADD45B|CSNK1A1|PLK2|DAPK3|EIF2AK3|DYRK1A|WEE1|CDK4|STK17A|STK17B|ABI1|RARA|AAK1|BMP2K|SIK3|ALPK3|SIK1|SIK2|SGK1|MAP3K14|BMPR1A|FGFR1
48856	0.00021328	0.015381	85	1469	326	8058	anatomical structure development	ATF1|ERRFI1|CSRNP1|CDKN1A|CITED2|ADM|IRS2|LAMC1|SHB|CYR61|ETS2|CSRP3|HEY1|ADAMTS1|PLAU|MYC|ZC3H12A|ITGAV|TIMP1|JAK2|JUNB|IL6R|SOX4|IER3|NKX3-1|EDARADD|MYOG|RBM15|ANXA2|TNFRSF12A|DYNLT1|DAPK3|IFRD1|DYRK1A|ARID5B|FOS|ACSL3|SIRT1|UGDH|ALDH1A3|KCNQ4|MYH9|ALPK3|VGLL2|CRYAB|TP53|CD44|CHST3|HBEGF|SDC4|HDAC9|PPP2CA|UGCG|XIRP1|STX3|SH2B3|SPEN|EGR1|TGFB2|JUND|ANGPT2|HSPA5|SORT1|EIF2AK3|CRIM1|SYNJ2|HNRNPAB|…
45893	0.00022054	0.01545	28	337	326	8058	positive regulation of transcription, DNA-dependent	ATF1|CSRNP1|CITED2|GABPB1|ABRA|ETS2|ARNTL|E2F3|JUNB|PPARGC1A|SOX4|MYOG|MAP2K3|SPEN|ZNF462|AKIRIN2|EGR1|RBM15|FOS|HNRNPAB|TBX3|VEGFA|KLF6|NR4A3|RARA|NAA15|VGLL2|TP53
43069	0.00023705	0.016146	23	254	326	8058	negative regulation of programmed cell death	ATF1|PRNP|CDKN1A|HSPA5|CITED2|SORT1|HSPB1|TNFAIP3|IRS2|TBX3|VEGFA|PPP2CB|BAG3|PIM1|ANGPTL2|CRYAB|TP53|HSPA1B|SOX4|CD44|IER3|HSPA1A|FGFR1
9891	0.00027726	0.018172	35	467	326	8058	positive regulation of biosynthetic process	ATF1|CSRNP1|CITED2|IRS2|GABPB1|ARPP19|ABRA|ETS2|ARNTL|MYC|E2F3|JAK2|JUNB|PPARGC1A|SOX4|MYOG|MAP2K3|SPEN|ZNF462|AKIRIN2|EGR1|TGFB2|RBM15|SAMD4A|FOS|HNRNPAB|TBX3|VEGFA|KLF6|KLF5|NR4A3|RARA|NAA15|VGLL2|TP53
51254	0.00028162	0.018172	28	342	326	8058	positive regulation of RNA metabolic process	ATF1|CSRNP1|CITED2|GABPB1|ABRA|ETS2|ARNTL|E2F3|JUNB|PPARGC1A|SOX4|MYOG|MAP2K3|SPEN|ZNF462|AKIRIN2|EGR1|RBM15|FOS|HNRNPAB|TBX3|VEGFA|KLF6|NR4A3|RARA|NAA15|VGLL2|TP53
51240	0.00029399	0.018484	15	133	326	8058	positive regulation of multicellular organismal process	ATF1|AKIRIN2|TGFB2|SLC22A5|ADM|ATP1A1|VEGFA|PANX1|THBD|MYC|RARA|JAK2|IL6R|BMPR1A|FGFR1
50896	0.00031942	0.018551	95	1705	326	8058	response to stimulus	ATF1|ERRFI1|CDKN1A|SMG1|DGKD|SRXN1|CITED2|HSPB8|HSPB7|HSPB1|SMC5|ADM|IRS2|PRDM2|BACH1|CYR61|ERO1L|PANX1|THBD|DUSP10|PLAU|MYC|PIM1|ANKRD1|JAK2|JUNB|IL6R|TPM4|IL1R1|TRAFD1|AEN|FOS|ACSL3|ATG14|TNFRSF1B|OSMR|SIRT1|ETV5|ALDH1A3|RARA|CRY1|ANGPTL2|SGK1|CRYAB|TP53|CD44|XPR1|CHST3|ITIH4|SLC22A5|ABHD2|ATP1A1|TFPI|HDAC9|PPP2CA|PPP2CB|SNN|NFIL3|MAT2A|DNAJB5|DNAJB4|STX3|SOCS6|PPARGC1A|SOCS7|IL12RB2|AKIRIN2|EG…
51239	0.00031981	0.018551	40	564	326	8058	regulation of multicellular organismal process	ATF1|ERRFI1|SLC22A5|SDC4|MAST2|HSPB7|ADM|ATP1A1|HDAC9|PANX1|THBD|CSRP3|PLAU|MYC|JAK2|LMCD1|IL6R|NKX3-1|SPEN|AKIRIN2|EGR1|TGFB2|JUND|ANGPT2|RBM15|ANXA2|TNFRSF12A|DYNLT1|EIF2AK3|TBX3|VEGFA|MAFF|RARA|ANGPTL2|KCNQ4|ANXA2P2|TP53|HBEGF|BMPR1A|FGFR1
6950	0.0003215	0.018551	63	1021	326	8058	response to stress	ERRFI1|CDKN1A|SMG1|SRXN1|CITED2|HSPB8|HSPB7|HSPB1|SMC5|ADM|BACH1|ERO1L|THBD|DUSP10|PLAU|PIM1|ANKRD1|JAK2|IL6R|TPM4|IL1R1|AEN|FOS|ATG14|SIRT1|ETV5|CRY1|ANGPTL2|SGK1|CRYAB|TP53|CD44|CHST3|ITIH4|ABHD2|TFPI|HDAC9|PPP2CB|SNN|DNAJB5|DNAJB4|STX3|SOCS6|PPARGC1A|AKIRIN2|PRNP|EGLN3|TGFB2|ANGPT2|HSPA1L|GADD45B|HSPA5|GADD45A|EIF2AK3|USP28|VEGFA|DNAJA1|KLF6|DNAJA4|NEDD4|MAFF|HSPA1B|HSPA1A
9408	0.00032605	0.018551	8	44	326	8058	response to heat	DNAJA1|HSPA1L|DNAJA4|DNAJB4|HSPB8|HSPB7|HSPB1|CRYAB
60548	0.00033289	0.018551	23	260	326	8058	negative regulation of cell death	ATF1|PRNP|CDKN1A|HSPA5|CITED2|SORT1|HSPB1|TNFAIP3|IRS2|TBX3|VEGFA|PPP2CB|BAG3|PIM1|ANGPTL2|CRYAB|TP53|HSPA1B|SOX4|CD44|IER3|HSPA1A|FGFR1
9653	0.0003697	0.020144	48	723	326	8058	anatomical structure morphogenesis	ATF1|ERRFI1|CSRNP1|CDKN1A|CITED2|ADM|LAMC1|SHB|CYR61|CSRP3|HEY1|ADAMTS1|PLAU|MYC|ZC3H12A|XIRP1|JAK2|JUNB|IER3|NKX3-1|EDARADD|SPEN|TGFB2|ANGPT2|RBM15|ANXA2|TNFRSF12A|HSPA5|ARID5B|HNRNPAB|TBX3|VEGFA|UGDH|ALDH1A3|KLF5|NR4A3|ACTC1|KCNQ4|MYH9|CSPG4|ANXA2P2|NAA15|CRYAB|TP53|CD44|CHST3|BMPR1A|FGFR1
6913	0.0003893	0.020751	14	122	326	8058	nucleocytoplasmic transport	FYTTD1|RANBP2|SMG1|NOP58|TGFB2|DUSP16|ABRA|THOC6|ARNTL|JAK2|KPNA2|SRSF10|TP53|KPNA1
51346	0.00042015	0.021332	7	35	326	8058	negative regulation of hydrolase activity	TGFB2|HSPA5|SORT1|ANGPTL2|SIRT1|CRYAB|TP53
51169	0.00042357	0.021332	14	123	326	8058	nuclear transport	FYTTD1|RANBP2|SMG1|NOP58|TGFB2|DUSP16|ABRA|THOC6|ARNTL|JAK2|KPNA2|SRSF10|TP53|KPNA1
51270	0.00043468	0.021332	17	168	326	8058	regulation of cellular component movement	SPAG9|TGFB2|ANGPT2|CITED2|ABHD2|ACTN1|RRAS2|NEXN|IRS2|HDAC9|VEGFA|PLAU|JAK2|IL6R|BCAR1|CHST3|HBEGF
10464	0.000435	0.021332	5	17	326	8058	regulation of mesenchymal cell proliferation	MYC|IRS2|VEGFA|BMPR1A|FGFR1
31328	0.00047476	0.022826	34	462	326	8058	positive regulation of cellular biosynthetic process	ATF1|CSRNP1|CITED2|IRS2|GABPB1|ARPP19|ABRA|ETS2|ARNTL|MYC|E2F3|JAK2|JUNB|PPARGC1A|SOX4|MYOG|MAP2K3|SPEN|ZNF462|AKIRIN2|EGR1|RBM15|SAMD4A|FOS|HNRNPAB|TBX3|VEGFA|KLF6|KLF5|NR4A3|RARA|NAA15|VGLL2|TP53
10557	0.00050334	0.023734	33	445	326	8058	positive regulation of macromolecule biosynthetic process	ATF1|CSRNP1|CITED2|IRS2|GABPB1|ABRA|ETS2|ARNTL|MYC|E2F3|JUNB|PPARGC1A|SOX4|MYOG|MAP2K3|SPEN|ZNF462|AKIRIN2|EGR1|TGFB2|RBM15|SAMD4A|FOS|HNRNPAB|TBX3|VEGFA|KLF6|KLF5|NR4A3|RARA|NAA15|VGLL2|TP53
9888	0.00051651	0.023896	31	409	326	8058	tissue development	ATF1|ERRFI1|CITED2|ADM|LAMC1|PPP2CA|UGCG|CSRP3|PLAU|MYC|XIRP1|JAK2|JUNB|NKX3-1|EDARADD|MYOG|SPEN|TGFB2|RBM15|EIF2AK3|HNRNPAB|TBX3|VEGFA|RCAN1|ALDH1A3|NR4A3|ACTC1|VGLL2|CD44|BMPR1A|FGFR1
45941	0.00054201	0.024611	30	392	326	8058	positive regulation of transcription	ATF1|CSRNP1|CITED2|GABPB1|ABRA|ETS2|ARNTL|MYC|E2F3|JUNB|PPARGC1A|SOX4|MYOG|MAP2K3|SPEN|ZNF462|AKIRIN2|EGR1|RBM15|FOS|HNRNPAB|TBX3|VEGFA|KLF6|KLF5|NR4A3|RARA|NAA15|VGLL2|TP53
30154	0.00063838	0.02846	55	882	326	8058	cell differentiation	ATF1|CITED2|MAST2|WIPF3|ADM|LAMC1|SHB|ERO1L|CSRP3|ZC3H12A|TIMP1|JAK2|JUNB|SOX4|EDARADD|MYOG|TNFRSF12A|DYNLT1|DAPK3|IFRD1|SIRT1|ANGPTL2|MYH9|CRYAB|TP53|CD44|CHST3|HDAC9|XIRP1|STX3|PPARGC1A|SOCS7|SH2B3|SRPK2|EGR1|TGFB2|JUND|ANGPT2|GADD45B|SORT1|EIF2AK3|HNRNPAB|TBX3|NFKB2|VEGFA|RCAN1|KLF6|ACTC1|NEDD4|STRN|CSPG4|NAA15|DFNA5|BMPR1A|FGFR1
6606	0.00070289	0.030686	9	61	326	8058	protein import into nucleus	RANBP2|NOP58|TGFB2|JAK2|KPNA2|TP53|ABRA|KPNA1|ARNTL
9607	0.00071933	0.030686	20	224	326	8058	response to biotic stimulus	AKIRIN2|HSPA1L|HSPA5|HSPB7|EIF2AK3|HSPB1|ADM|FOS|ERO1L|DNAJA1|THBD|DNAJB5|DNAJB4|ABCE1|TP53|IL6R|HSPA1B|XPR1|IL12RB2|HSPA1A
10628	0.00072586	0.030686	30	399	326	8058	positive regulation of gene expression	ATF1|CSRNP1|CITED2|GABPB1|ABRA|ETS2|ARNTL|MYC|E2F3|JUNB|PPARGC1A|SOX4|MYOG|MAP2K3|SPEN|ZNF462|AKIRIN2|EGR1|RBM15|FOS|HNRNPAB|TBX3|VEGFA|KLF6|KLF5|NR4A3|RARA|NAA15|VGLL2|TP53
23046	0.00076977	0.031458	68	1160	326	8058	signaling process	ATF1|GPSM2|CDKN1A|DGKD|PRKAG2|ADM|IRS2|SHB|BACH1|DUSP16|RND3|NUDT4|DUSP10|YWHAQ|PLAU|RASSF5|ANKRD1|JAK2|IL6R|PRKG1|EDARADD|MAP2K3|IL1R1|STARD8|PDE4D|DAPK3|RRAS2|PPP2R5A|FOS|DUSP8|RARA|ANGPTL2|SIK1|SIK2|CRYAB|TP53|TRIM55|HBEGF|RRAD|ARHGAP17|CORO1C|RAB21|PPP2CA|SDCBP|TP53BP2|SOCS6|CTNNAL1|SRPK2|PTPN1|ANGPT2|GADD45B|CSNK1A1|EIF2AK3|RASSF8|USP28|TBX3|COLQ|NFKB2|RCAN1|KLF6|CDK4|RAB15|STK17A|STK17B|DLG…
23060	0.00076977	0.031458	68	1160	326	8058	signal transmission	ATF1|GPSM2|CDKN1A|DGKD|PRKAG2|ADM|IRS2|SHB|BACH1|DUSP16|RND3|NUDT4|DUSP10|YWHAQ|PLAU|RASSF5|ANKRD1|JAK2|IL6R|PRKG1|EDARADD|MAP2K3|IL1R1|STARD8|PDE4D|DAPK3|RRAS2|PPP2R5A|FOS|DUSP8|RARA|ANGPTL2|SIK1|SIK2|CRYAB|TP53|TRIM55|HBEGF|RRAD|ARHGAP17|CORO1C|RAB21|PPP2CA|SDCBP|TP53BP2|SOCS6|CTNNAL1|SRPK2|PTPN1|ANGPT2|GADD45B|CSNK1A1|EIF2AK3|RASSF8|USP28|TBX3|COLQ|NFKB2|RCAN1|KLF6|CDK4|RAB15|STK17A|STK17B|DLG…
7166	0.00084363	0.033911	40	592	326	8058	cell surface receptor linked signaling pathway	CSRNP1|GPSM2|DGKD|IRS2|HEY1|ADAMTS1|ITGAV|JAK2|SOCS7|IL6R|SOX4|IL12RB2|TLE4|SPEN|TGFB2|ANGPT2|RBM15|HOMER2|CSNK1A1|IL1R1|SORT1|EIF2AK3|ARID5B|FOS|TNFRSF1B|OSMR|VEGFA|CYLD|HEYL|BCL9|KLF6|ABI1|PPAP2A|MYH9|STRN|BCAR1|XPR1|HBEGF|BMPR1A|FGFR1
42981	0.00088362	0.034946	39	574	326	8058	regulation of apoptosis	ATF1|CDKN1A|CITED2|HSPB1|TNFAIP3|IRS2|PPP2CA|PPP2CB|BAG3|PIM1|TP53BP2|JAK2|IL6R|SOX4|IER3|PRNP|TGFB2|HSPA5|SORT1|ACTN1|DAPK3|EIF2AK3|AEN|USP28|SIRT1|TBX3|VEGFA|ALDH1A3|STK17A|STK17B|DLG5|ANGPTL2|CRYAB|TP53|HSPA1B|BCAR1|CD44|HSPA1A|FGFR1
30334	0.00092008	0.03581	15	148	326	8058	regulation of cell migration	SPAG9|TGFB2|ANGPT2|CITED2|ABHD2|RRAS2|NEXN|IRS2|HDAC9|VEGFA|PLAU|JAK2|IL6R|BCAR1|HBEGF
48008	0.00098606	0.036766	5	20	326	8058	platelet-derived growth factor receptor signaling pathway	CSRNP1|ARID5B|JAK2|BCAR1|VEGFA
51170	0.0010036	0.036766	9	64	326	8058	nuclear import	RANBP2|NOP58|TGFB2|JAK2|KPNA2|TP53|ABRA|KPNA1|ARNTL
30195	0.0010057	0.036766	4	12	326	8058	negative regulation of blood coagulation	THBD|ANXA2|PLAU|ANXA2P2
60674	0.0010057	0.036766	4	12	326	8058	placenta blood vessel development	SPEN|RBM15|JUNB|CYR61
32879	0.0010196	0.036766	31	426	326	8058	regulation of localization	ATF1|CITED2|ABHD2|PRKAG2|NEXN|IRS2|ARPP19|HDAC9|NUDT4|PANX1|PLAU|ITGAV|JAK2|IL6R|SPAG9|TGFB2|ANGPT2|ANXA2|ACTN1|RRAS2|SIRT1|VEGFA|KIAA0226|CYLD|NEDD4|PKIG|CRYAB|BCAR1|CHST3|HBEGF|BMPR1A
51272	0.0010491	0.036829	11	91	326	8058	positive regulation of cellular component movement	SPAG9|TGFB2|RRAS2|IRS2|JAK2|HDAC9|IL6R|BCAR1|CHST3|HBEGF|VEGFA
43067	0.0010762	0.036829	39	580	326	8058	regulation of programmed cell death	ATF1|CDKN1A|CITED2|HSPB1|TNFAIP3|IRS2|PPP2CA|PPP2CB|BAG3|PIM1|TP53BP2|JAK2|IL6R|SOX4|IER3|PRNP|TGFB2|HSPA5|SORT1|ACTN1|DAPK3|EIF2AK3|AEN|USP28|SIRT1|TBX3|VEGFA|ALDH1A3|STK17A|STK17B|DLG5|ANGPTL2|CRYAB|TP53|HSPA1B|BCAR1|CD44|HSPA1A|FGFR1
7169	0.0010812	0.036829	14	135	326	8058	transmembrane receptor protein tyrosine kinase signaling pathway	CSRNP1|DGKD|ANGPT2|SORT1|EIF2AK3|ARID5B|IRS2|VEGFA|ABI1|JAK2|SOCS7|BCAR1|HBEGF|FGFR1
7507	0.0010814	0.036829	16	166	326	8058	heart development	SPEN|TGFB2|RBM15|CITED2|ADM|HDAC9|TBX3|VEGFA|CSRP3|ACTC1|ADAMTS1|XIRP1|ALPK3|SOX4|NKX3-1|BMPR1A
61138	0.0011244	0.037766	9	65	326	8058	morphogenesis of a branching epithelium	SPEN|RBM15|MYC|ADM|TBX3|CD44|NKX3-1|VEGFA|FGFR1
40011	0.0011624	0.038515	19	216	326	8058	locomotion	ATF1|TGFB2|TNFRSF12A|ARID5B|MSN|LAMC1|ATP1A1|PVR|CYR61|VEGFA|DNAJA1|SDCBP|PLAU|NEDD4|PPAP2A|MYH9|IL6R|BCAR1|CD44
10941	0.0013049	0.042654	39	586	326	8058	regulation of cell death	ATF1|CDKN1A|CITED2|HSPB1|TNFAIP3|IRS2|PPP2CA|PPP2CB|BAG3|PIM1|TP53BP2|JAK2|IL6R|SOX4|IER3|PRNP|TGFB2|HSPA5|SORT1|ACTN1|DAPK3|EIF2AK3|AEN|USP28|SIRT1|TBX3|VEGFA|ALDH1A3|STK17A|STK17B|DLG5|ANGPTL2|CRYAB|TP53|HSPA1B|BCAR1|CD44|HSPA1A|FGFR1
7498	0.0013221	0.042654	7	42	326	8058	mesoderm development	PPP2CA|NR4A3|JAK2|TBX3|VEGFA|BMPR1A|FGFR1
6357	0.0013635	0.043418	36	529	326	8058	regulation of transcription from RNA polymerase II promoter	ATF1|CSRNP1|CITED2|GABPB1|CHD2|BACH1|HDAC9|ABRA|ARNTL|HEY1|DNAJB5|MYC|ANKRD1|JUNB|PPARGC1A|LMCD1|MYOG|SPEN|ZNF462|AKIRIN2|EGR1|JUND|RBM15|EAF1|FOS|SIRT1|TBX3|VEGFA|KLF6|NR4A3|NEDD4|RARA|SIK1|PKIG|VGLL2|TP53
48534	0.0014753	0.045277	15	155	326	8058	hemopoietic or lymphoid organ development	SPEN|EGR1|TGFB2|RBM15|HDAC9|NFKB2|VEGFA|KLF6|MYH9|TIMP1|JAK2|JUNB|SH2B3|TP53|SOX4
45944	0.0015066	0.045277	21	255	326	8058	positive regulation of transcription from RNA polymerase II promoter	ATF1|MYOG|SPEN|ZNF462|AKIRIN2|EGR1|CSRNP1|RBM15|CITED2|FOS|GABPB1|ABRA|ARNTL|VEGFA|KLF6|NR4A3|RARA|VGLL2|JUNB|PPARGC1A|TP53
6793	0.0015105	0.045277	42	650	326	8058	phosphorus metabolic process	CDKN1A|SMG1|MAST4|MAST2|DUSP16|DUSP14|PPP2CA|PPP2CB|DUSP10|PIM1|JAK2|PRKG1|IL12RB2|MAP2K3|SRPK2|PTPN1|TGFB2|GADD45B|CSNK1A1|PLK2|DAPK3|EIF2AK3|DYRK1A|SYNJ2|DUSP8|WEE1|CDK4|STK17A|STK17B|ABI1|PPAP2A|RARA|AAK1|BMP2K|SIK3|ALPK3|SIK1|SIK2|SGK1|MAP3K14|BMPR1A|FGFR1
6796	0.0015105	0.045277	42	650	326	8058	phosphate metabolic process	CDKN1A|SMG1|MAST4|MAST2|DUSP16|DUSP14|PPP2CA|PPP2CB|DUSP10|PIM1|JAK2|PRKG1|IL12RB2|MAP2K3|SRPK2|PTPN1|TGFB2|GADD45B|CSNK1A1|PLK2|DAPK3|EIF2AK3|DYRK1A|SYNJ2|DUSP8|WEE1|CDK4|STK17A|STK17B|ABI1|PPAP2A|RARA|AAK1|BMP2K|SIK3|ALPK3|SIK1|SIK2|SGK1|MAP3K14|BMPR1A|FGFR1
48869	0.0015187	0.045277	55	915	326	8058	cellular developmental process	ATF1|CITED2|MAST2|WIPF3|ADM|LAMC1|SHB|ERO1L|CSRP3|ZC3H12A|TIMP1|JAK2|JUNB|SOX4|EDARADD|MYOG|TNFRSF12A|DYNLT1|DAPK3|IFRD1|SIRT1|ANGPTL2|MYH9|CRYAB|TP53|CD44|CHST3|HDAC9|XIRP1|STX3|PPARGC1A|SOCS7|SH2B3|SRPK2|EGR1|TGFB2|JUND|ANGPT2|GADD45B|SORT1|EIF2AK3|HNRNPAB|TBX3|NFKB2|VEGFA|RCAN1|KLF6|ACTC1|NEDD4|STRN|CSPG4|NAA15|DFNA5|BMPR1A|FGFR1
45722	0.0016319	0.045277	2	2	326	8058	positive regulation of gluconeogenesis	ARPP19|PPARGC1A
50748	0.0016319	0.045277	2	2	326	8058	negative regulation of lipoprotein metabolic process	HHATL|ITGAV
51005	0.0016319	0.045277	2	2	326	8058	negative regulation of lipoprotein lipase activity	SORT1|ANGPTL2
51097	0.0016319	0.045277	2	2	326	8058	negative regulation of helicase activity	SIRT1|TP53
60192	0.0016319	0.045277	2	2	326	8058	negative regulation of lipase activity	SORT1|ANGPTL2
48378	0.0016319	0.045277	2	2	326	8058	regulation of lateral mesodermal cell fate specification	BMPR1A|FGFR1
51252	0.0016434	0.045277	65	1129	326	8058	regulation of RNA metabolic process	ATF1|CSRNP1|CITED2|HNRNPU|JMJD1C|PRDM2|GABPB1|CHD2|BACH1|BACH2|ABRA|ETS2|HEY1|YWHAQ|ZNF529|MYC|ZNF207|ANKRD1|JUNB|LMCD1|SOX4|NKX3-1|MYOG|MAP2K3|CERS6|RBM15|TSC22D2|ARID5A|ARID5B|FOS|TNFRSF1B|SIRT1|ETV5|RARA|SIK1|VGLL2|TP53|ATF3|HDAC9|ARNTL|NFIL3|DNAJB5|E2F3|PPARGC1A|SRSF10|SPEN|ZNF462|AKIRIN2|EGR1|JUND|EAF1|HNRNPAB|TBX3|GATAD2A|NFKB2|VEGFA|HEYL|KLF6|KLF5|NR4A3|NEDD4|MAFF|MAFK|NAA15|PKIG
31099	0.0017523	0.047741	7	44	326	8058	regeneration	CDKN1A|ANGPT2|NR4A3|PLAU|ADM|JAK2|CHST3
44092	0.001781	0.04799	22	276	326	8058	negative regulation of molecular function	ZNF462|ERRFI1|CDKN1A|PSMD12|TGFB2|GADD45B|HSPA5|GADD45A|SORT1|PRKAG2|IRS2|DUSP8|SIRT1|DUSP16|PPP2CA|CYLD|PIM1|ANGPTL2|PKIG|JAK2|CRYAB|TP53
30335	0.0018017	0.048018	10	83	326	8058	positive regulation of cell migration	SPAG9|TGFB2|RRAS2|IRS2|JAK2|HDAC9|IL6R|BCAR1|HBEGF|VEGFA
Down-regulated 5 h post-ECC in young and elderly muscle:
Unique young:
No enriched GO terms identified
Unique elderly:
No enriched GO terms identified
Common to young and elderly:
48511	6.3068e-06	0.0057076	6	77	49	8058	rhythmic process	PER1|DBP|HLF|PER3|ANGPT1|TEF
48705	5.6609e-05	0.025616	5	69	49	8058	skeletal system morphogenesis	SGPL1|TCF15|SIX1|ACVR2B|HOXA11
50910	0.00010826	0.027404	2	3	49	8058	detection of mechanical stimulus involved in sensory perception of sound	SLC12A2|CHRNA10
6355	0.00014173	0.027404	17	1093	49	8058	regulation of transcription, DNA-dependent	CEBPB|HLF|LDB1|TCF15|TSC22D3|SIX1|NR1D2|IKZF2|HOXA11|NR3C2|NFKBIA|PER1|DBP|RBL1|PER3|TEF|PITX3
7166	0.00016366	0.027404	12	592	49	8058	cell surface receptor linked signaling pathway	AMER1|SLC12A2|NFKBIA|SGPL1|LDB1|ANGPT1|DIXDC1|GAB1|SOS1|GPRC5C|ACVR2B|LGR5
45638	0.00019123	0.027404	3	19	49	8058	negative regulation of myeloid cell differentiation	NFKBIA|LDB1|TOB2
51252	0.00021197	0.027404	17	1129	49	8058	regulation of RNA metabolic process	CEBPB|HLF|LDB1|TCF15|TSC22D3|SIX1|NR1D2|IKZF2|HOXA11|NR3C2|NFKBIA|PER1|DBP|RBL1|PER3|TEF|PITX3
50974	0.00035806	0.040506	2	5	49	8058	detection of mechanical stimulus involved in sensory perception	SLC12A2|CHRNA10
