# Supplementary material for: The acute transcriptional response to resistance exercise: impact of age and contraction mode
Source: Aging (Albany NY). 2019 Apr 15;11(7):2111–26. doi: 10.18632/aging.101904 (PMC6503873; doi:10.18632/aging.101904)
Supplement: Supplementary Table S3 [file aging-11-101904-s004.xlsx]

## Sheet: Young post-CON
Term	Overlap	P-value	Adjusted P-value	Z-score	Combined Score	Genes
Up-regulated in young muscle 5 h post-CON exercise:
MAPK signaling pathway_Homo sapiens_hsa04010	14/255	1.38576e-06	0.000230036	-1.99779	26.9487	DUSP4;TGFB2;IL1R1;GADD45A;HSPB1;RRAS2;FOS;DUSP8;DUSP16;NFKB2;MYC;MAP3K14;HSPA1B;HSPA1A
HTLV-I infection_Homo sapiens_hsa05166	12/258	4.12956e-05	0.00342754	-1.91802	19.3619	EGR1;CDKN1A;TGFB2;IL1R1;MYC;RRAS2;WNT9A;FOS;MAP3K14;ATF3;ETS2;NFKB2
Epstein-Barr virus infection_Homo sapiens_hsa05169	10/202	0.000108585	0.00600838	-1.89864	17.3307	CDKN1A;NEDD4;MYC;EIF2AK3;HSPB1;TNFAIP3;MAP3K14;HSPA1B;HSPA1A;NFKB2
TGF-beta signaling pathway_Homo sapiens_hsa04350	6/84	0.000389053	0.0161457	-1.78361	14.0045	PPP2CA;TGFB2;PPP2R1B;SMURF1;MYC;BMPR1A
Bladder cancer_Homo sapiens_hsa05219	4/41	0.00117745	0.0390913	-1.71381	11.5587	CDKN1A;MYC;VEGFA;HBEGF
Down-regulated in young muscle 5 h post-CON exercise:
No enriched KEGG pathway terms identified

## Sheet: Young post-ECC
Term	Overlap	P-value	Adjusted P-value	Z-score	Combined Score	Genes
Up-regulated in young muscle 5 h post-ECC exercise:
MAPK signaling pathway_Homo sapiens_hsa04010	29/255	5.6019e-10	1.27163e-07	-1.99779	42.5584	HSPB1;DUSP16;DUSP10;MYC;MAP3K8;FLNC;MAP2K3;TGFB2;MAP2K1;JUND;GADD45B;HSPA1L;IL1R1;GADD45A;RRAS2;FOS;DUSP8;TNFRSF1A;NFKB2;NR4A1;MRAS;MAPKAPK3;DDIT3;RAPGEF2;MAP3K14;TP53;HSPA1B;FGFR1;HSPA1A
Proteoglycans in cancer_Homo sapiens_hsa05205	22/203	1.60628e-07	1.82313e-05	-1.98745	31.0921	CD63;CDKN1A;TGFB2;MAP2K1;SDC4;RRAS2;MSN;CBLB;WNT9A;HIF1A;VEGFA;MRAS;CTTN;PLAU;MYC;ITGAV;FLNC;ITGA5;TP53;CD44;FGFR1;HBEGF
Bladder cancer_Homo sapiens_hsa05219	9/41	2.39923e-06	0.000181542	-1.81666	23.5083	CDKN1A;MAP2K1;CDK4;MYC;DAPK3;E2F3;TP53;VEGFA;HBEGF
FoxO signaling pathway_Homo sapiens_hsa04068	14/133	3.94911e-05	0.00224112	-1.75001	17.7441	CDKN1A;TGFB2;GABARAPL1;MAP2K1;SMAD3;GADD45B;HOMER1;GADD45A;HOMER2;PLK2;PRKAG2;IRS2;SIRT1;SGK1
Prion diseases_Homo sapiens_hsa05020	7/35	6.14794e-05	0.00279116	-1.62186	15.7268	PRNP;EGR1;MAP2K1;HSPA5;NCAM1;LAMC1;HSPA1A
PI3K-Akt signaling pathway_Homo sapiens_hsa04151	24/341	8.29444e-05	0.00282906	-1.93741	18.2065	CDKN1A;MAP2K1;HSP90AA1;ANGPT2;PPP2R5A;LAMC1;OSMR;VEGFA;PPP2CA;COL1A1;NR4A1;PPP2CB;PPP2R1B;YWHAQ;CDK4;MYC;ITGAV;ITGA5;SGK1;JAK2;EIF4E;TP53;IL6R;FGFR1
HTLV-I infection_Homo sapiens_hsa05166	20/258	8.72397e-05	0.00282906	-1.79312	16.76	ATF1;EGR1;CDKN1A;TGFB2;SMAD3;IL1R1;RRAS2;WNT9A;FOS;ETS2;TNFRSF1A;NFKB2;MRAS;CDK4;MYC;E2F3;SLC25A5;MAP3K14;TP53;ATF3
Epstein-Barr virus infection_Homo sapiens_hsa05169	17/202	0.000108119	0.00306788	-1.77514	16.211	MAP2K3;CDKN1A;PSMD12;HSPA1L;EIF2AK3;HSPB1;TNFAIP3;NFKB2;YWHAQ;NEDD4;MYC;POLR1C;MAP3K14;TP53;CD44;HSPA1B;HSPA1A
Protein processing in endoplasmic reticulum_Homo sapiens_hsa04141	15/169	0.000150793	0.00380334	-1.62332	14.2845	PPP1R15A;HSP90AA1;HSPA5;HSPA1L;EIF2AK3;ERO1L;DNAJA1;SEC61A1;DNAJB1;HSPH1;DDIT3;UBQLN1;CRYAB;HSPA1B;HSPA1A
Apoptosis_Homo sapiens_hsa04210	13/140	0.000263015	0.00593654	-1.72993	14.2603	MAP2K1;GADD45B;GADD45A;EIF2AK3;FOS;TUBA4A;TNFRSF1A;TUBA1C;TUBA1B;DDIT3;MAP3K14;TP53;CTSB
Chronic myeloid leukemia_Homo sapiens_hsa05220	9/73	0.000287674	0.00593654	-1.61019	13.129	CDKN1A;TGFB2;MAP2K1;SMAD3;CDK4;MYC;E2F3;CBLB;TP53
Pathways in cancer_Homo sapiens_hsa05200	25/397	0.000334038	0.00631889	-1.81615	14.5369	CDKN1A;CBLB;LAMC1;HIF1A;GNA13;RASSF5;MYC;ITGAV;E2F3;NKX3-1;TGFB2;MAP2K1;EGLN3;HSP90AA1;SMAD3;DAPK3;WNT9A;FOS;VEGFA;NFKB2;CDK4;RARA;TP53;FGFR1;PPARD
AGE-RAGE signaling pathway in diabetic complications_Homo sapiens_hsa04933	10/101	0.00080011	0.0139711	-1.7189	12.2571	COL1A1;THBD;EGR1;DIAPH1;TGFB2;SMAD3;CDK4;PIM1;JAK2;VEGFA
HIF-1 signaling pathway_Homo sapiens_hsa04066	10/103	0.000932366	0.0151176	-1.49364	10.4223	CDKN1A;MAP2K1;EGLN3;ANGPT2;ENO1;TIMP1;EIF4E;HIF1A;IL6R;VEGFA
Cell cycle_Homo sapiens_hsa04110	11/124	0.00111978	0.0158868	-1.354	9.19993	CDKN1A;TGFB2;WEE1;SMAD3;GADD45B;YWHAQ;GADD45A;CDK4;MYC;E2F3;TP53
Pathogenic Escherichia coli infection_Homo sapiens_hsa05130	7/55	0.00111534	0.0158868	-1.27663	8.67929	TUBA1C;TUBA1B;TUBB6;CTTN;YWHAQ;TUBB4B;TUBA4A
Regulation of actin cytoskeleton_Homo sapiens_hsa04810	15/214	0.00178333	0.0238127	-1.5252	9.65337	MAP2K1;ACTN1;RRAS2;MSN;SSH1;ENAH;GNA13;DIAPH1;MRAS;MYH9;ITGAV;ITGA5;BCAR1;VCL;FGFR1
Hippo signaling pathway_Homo sapiens_hsa04390	12/153	0.00197168	0.0248651	-1.32755	8.26911	PPP2CA;PPP2CB;TGFB2;SMAD3;FRMD6;LATS2;PPP2R1B;YWHAQ;MYC;TP53BP2;WNT9A;BMPR1A
Longevity regulating pathway - multiple species_Homo sapiens_hsa04213	7/64	0.00271988	0.0324954	-1.33493	7.88567	HSPA1L;PRKAG2;IRS2;CRYAB;SIRT1;HSPA1B;HSPA1A
Sphingolipid signaling pathway_Homo sapiens_hsa04071	10/120	0.00294371	0.0334111	-1.28742	7.50317	PPP2CA;GNA13;PPP2CB;MAP2K1;CERS6;PPP2R1B;PPP2R5A;SGMS2;TP53;TNFRSF1A
Pancreatic cancer_Homo sapiens_hsa05212	7/66	0.00324221	0.0344291	-1.27185	7.28963	TGFB2;MAP2K1;SMAD3;CDK4;E2F3;TP53;VEGFA
TGF-beta signaling pathway_Homo sapiens_hsa04350	8/84	0.00333674	0.0344291	-1.23818	7.06106	PPP2CA;PPP2CB;TGFB2;SMAD3;PPP2R1B;SMURF1;MYC;BMPR1A
p53 signaling pathway_Homo sapiens_hsa04115	7/69	0.004165	0.0411068	-1.00988	5.53521	CDKN1A;GADD45B;SESN3;GADD45A;CDK4;PPM1D;TP53
Adipocytokine signaling pathway_Homo sapiens_hsa04920	7/70	0.0045129	0.0426845	-1.05025	5.67218	PRKAG2;IRS2;ACSL3;TNFRSF1B;JAK2;PPARGC1A;TNFRSF1A
TNF signaling pathway_Homo sapiens_hsa04668	9/110	0.00527937	0.0479367	-1.26847	6.65177	MAP2K3;MAP2K1;TNFAIP3;MAP3K8;FOS;TNFRSF1B;JUNB;MAP3K14;TNFRSF1A
Down-regulated in young muscle 5 h post-ECC exercise:
No enriched KEGG pathway terms identified

## Sheet: Older post-CON
Term	Overlap	P-value	Adjusted P-value	Z-score	Combined Score	Genes
Up-regulated in older muscle 5 h post-CON exercise:
Proteoglycans in cancer_Homo sapiens_hsa05205	29/203	3.67844e-11	8.38684e-09	-2.01334	48.3723	CD63;CDKN1A;DDX5;SDC4;IQGAP1;PIK3CB;CBL;NRAS;PLAU;MYC;KDR;FLNA;PLCE1;FLNB;FLNC;TGFB2;ARHGEF12;LUM;CAV1;STAT3;FZD6;MSN;TFAP4;CTTN;MDM2;PDCD4;TP53;CD44;HBEGF
Protein digestion and absorption_Homo sapiens_hsa04974	17/90	5.89353e-09	6.71862e-07	-1.68988	32.0223	SLC36A1;COL18A1;ELN;PRCP;ATP1B3;SLC3A2;ATP1A1;COL1A1;COL3A1;COL1A2;COL5A1;COL4A2;COL4A1;COL5A3;COL5A2;COL4A3;COL6A1
PI3K-Akt signaling pathway_Homo sapiens_hsa04151	33/341	4.405e-08	3.3051e-06	-2.01519	34.1331	LAMA5;CDKN1A;CSF1;LAMA4;TNC;LAMC1;PIK3CB;NRAS;PPP2R1B;YWHAQ;MYC;CREB3L2;KDR;IL6R;ANGPT2;VWF;ITGA3;ITGA1;PPP2R5A;OSMR;GNG11;COL1A1;CDK6;COL1A2;COL4A2;RHEB;COL4A1;COL4A3;COL6A1;MDM2;TEK;SGK1;TP53
Focal adhesion_Homo sapiens_hsa04510	24/202	7.04927e-08	3.3051e-06	-1.84657	30.4089	LAMA5;VWF;ITGA3;CAV1;LAMA4;ACTN1;ITGA1;TNC;PARVA;LAMC1;ACTN4;PIK3CB;COL1A1;DIAPH1;COL1A2;COL4A2;COL4A1;COL4A3;COL6A1;KDR;FLNA;FLNB;FLNC;BCAR1
ECM-receptor interaction_Homo sapiens_hsa04512	15/82	7.24803e-08	3.3051e-06	-1.591	26.1559	LAMA5;SDC4;VWF;ITGA3;LAMA4;ITGA1;TNC;LAMC1;COL1A1;COL1A2;COL4A2;COL4A1;COL4A3;COL6A1;CD44
AGE-RAGE signaling pathway in diabetic complications_Homo sapiens_hsa04933	16/101	2.15696e-07	8.19646e-06	-1.91917	29.458	EGR1;TGFB2;VCAM1;STAT3;PIK3CB;TGFBR2;COL1A1;DIAPH1;COL3A1;NRAS;COL1A2;COL4A2;COL4A1;COL4A3;BAX;PLCE1
Chronic myeloid leukemia_Homo sapiens_hsa05220	10/73	4.7498e-06	0.000154708	-1.74118	21.3424	CDKN1A;TGFB2;NRAS;CDK6;MECOM;MYC;MDM2;PIK3CB;CBL;TP53;TGFBR2;RUNX1
Amoebiasis_Homo sapiens_hsa05146	14/100	5.5572e-06	0.00015838	-1.67761	20.2998	LAMA5;TGFB2;IL1R1;LAMA4;ACTN1;LAMC1;ACTN4;PIK3CB;COL1A1;COL3A1;COL1A2;COL4A2;COL4A1;COL4A3
Small cell lung cancer_Homo sapiens_hsa05222	10/86	2.66495e-05	0.000675121	-1.63486	17.2195	LAMA5;CDK6;COL4A2;COL4A1;ITGA3;LAMA4;MYC;COL4A3;TRAF5;LAMC1;PIK3CB;TP53
Bladder cancer_Homo sapiens_hsa05219	8/41	5.18017e-05	0.00118108	-1.45669	14.3748	CDKN1A;NRAS;MYC;DAPK3;MDM2;TP53;TYMP;HBEGF
Pathways in cancer_Homo sapiens_hsa05200	29/397	6.86804e-05	0.00142356	-1.84285	17.6656	LAMA5;CDKN1A;LAMA4;ADCY4;LAMC1;PIK3CB;CBL;NRAS;MECOM;MYC;TGFB2;ARHGEF12;ITGA3;STAT3;DAPK3;FZD6;GNG11;TGFBR2;RUNX1;NFKB2;CDK6;COL4A2;COL4A1;COL4A3;TRAF5;RARA;MDM2;BAX;TP53
TNF signaling pathway_Homo sapiens_hsa04668	12/110	0.000297294	0.00564858	-1.61848	13.1433	MAP2K3;MMP14;VCAM1;CSF1;CREB3L2;BCL3;TRAF5;TNFAIP3;MAP3K8;PIK3CB;TNFRSF1B;MAP3K14
HTLV-I infection_Homo sapiens_hsa05166	20/258	0.000419188	0.00731392	-1.64324	12.7798	NRP1;EGR1;CDKN1A;TGFB2;VCAM1;IL1R1;FZD6;ADCY4;PIK3CB;ETS2;RELB;TGFBR2;NFKB2;NRAS;MYC;BAX;SLC25A5;POLE;MAP3K14;TP53
p53 signaling pathway_Homo sapiens_hsa04115	9/69	0.0004491	0.00731392	-1.32167	10.1878	CDKN1A;CDK6;SESN3;GADD45A;MDM2;BAX;TNFRSF10B;TP53;BBC3
MAPK signaling pathway_Homo sapiens_hsa04010	19/255	0.000931929	0.0141653	-1.64135	11.4538	MAP2K3;MAP3K2;TGFB2;IL1R1;GADD45A;DUSP8;MAPK8IP3;RELB;TGFBR2;NFKB2;NRAS;MECOM;MYC;FLNA;FLNB;MAP3K8;FLNC;MAP3K14;TP53
Longevity regulating pathway - mammal_Homo sapiens_hsa04211	10/94	0.00113186	0.016129	-1.48697	10.0875	NRAS;SESN3;RHEB;CREB3L2;ADCY4;PRKAG2;BAX;PIK3CB;PPARGC1A;TP53
Epstein-Barr virus infection_Homo sapiens_hsa05169	16/202	0.00121916	0.016351	-1.55283	10.4189	MAP2K3;CDKN1A;STAT3;EIF2AK3;TNFAIP3;PIK3CB;RELB;NFKB2;YWHAQ;NEDD4;MYC;TRAF5;MDM2;MAP3K14;TP53;CD44
Mineral absorption_Homo sapiens_hsa04978	7/51	0.00141294	0.0178973	-1.03502	6.79187	SLC11A2;HMOX1;TRPM7;ATP1B3;ATP1A1;ATP2B1;FTL
Regulation of actin cytoskeleton_Homo sapiens_hsa04810	16/214	0.00220771	0.0264925	-1.47573	9.02527	CYFIP1;ARHGEF12;ITGA3;ACTN1;ITGA1;MSN;ACTN4;IQGAP1;PIK3CB;ENAH;DIAPH1;NRAS;TMSB4X;MYH9;WASF2;BCAR1
Viral carcinogenesis_Homo sapiens_hsa05203	15/205	0.0036627	0.040983	-1.49902	8.40882	CDKN1A;ACTN1;STAT3;ACTN4;PIK3CB;NFKB2;C3;NRAS;CDK6;YWHAQ;CREB3L2;TRAF5;MDM2;BAX;TP53
NF-kappa B signaling pathway_Homo sapiens_hsa04064	9/93	0.00377475	0.040983	-1.19874	6.6883	VCAM1;IL1R1;PLAU;TRAF5;TNFAIP3;TRIM25;MAP3K14;RELB;NFKB2
Down-regulated in older muscle 5 h post-CON exercise:
Parkinson's disease_Homo sapiens_hsa05012	24/142	9.99425e-18	1.85893e-15	-1.76812	69.2123	NDUFA9;NDUFB10;NDUFA5;NDUFB3;NDUFA10;ATP5A1;ATP5C1;ATP5J;NDUFC1;UQCR10;SDHA;SDHB;ATP5G1;ATP5B;GNAL;NDUFS8;NDUFS7;UBB;NDUFS4;VDAC3;NDUFS2;NDUFS1;UQCRC2;SLC25A4
Oxidative phosphorylation_Homo sapiens_hsa00190	21/133	4.80263e-15	4.46645e-13	-1.80174	59.4026	NDUFA9;NDUFB10;NDUFA5;NDUFB3;NDUFA10;ATP5A1;ATP5C1;ATP5J;NDUFC1;UQCR10;SDHA;SDHB;ATP5G1;ATP5B;NDUFS8;NDUFS7;NDUFS4;NDUFS2;NDUFS1;UQCRC2;COX10
Huntington's disease_Homo sapiens_hsa05016	22/193	1.02874e-12	6.3782e-11	-1.85137	51.1028	NDUFA9;NDUFB10;NDUFA5;NDUFB3;NDUFA10;ATP5A1;ATP5C1;ATP5J;NDUFC1;UQCR10;SDHA;SDHB;ATP5G1;ATP5B;NDUFS8;NDUFS7;NDUFS4;VDAC3;NDUFS2;NDUFS1;UQCRC2;SLC25A4
Alzheimer's disease_Homo sapiens_hsa05010	20/168	5.02973e-12	2.33882e-10	-1.76679	45.9641	NDUFA9;NDUFB10;NDUFA5;NDUFB3;NDUFA10;ATP5A1;ATP5C1;ATP5J;NDUFC1;UQCR10;SDHA;SDHB;ATP5G1;ATP5B;NDUFS8;NDUFS7;NDUFS4;NDUFS2;NDUFS1;UQCRC2
Non-alcoholic fatty liver disease (NAFLD)_Homo sapiens_hsa04932	18/151	5.83373e-11	2.17015e-09	-1.85986	43.8271	NDUFA9;NDUFB10;NDUFA5;NDUFB3;NDUFA10;NDUFC1;UQCR10;SDHA;SDHB;ADIPOR2;NDUFS8;NDUFS7;NDUFS4;MLX;NDUFS2;NDUFS1;UQCRC2;PPARA
Metabolic pathways_Homo sapiens_hsa01100	52/1239	3.75709e-10	1.1647e-08	-1.88742	40.9613	NDUFA10;ATP5C1;CPOX;ATP5G1;NNT;ACADM;ACAD8;PLA2G12A;ARG2;GPT2;DCXR;MCCC1;NDUFC1;SDHA;SDHB;ALDH5A1;NDUFS8;NDUFS7;TST;BDH1;NDUFS4;ALDH1A1;NDUFS2;NDUFS1;UQCRC2;DLD;BCAT2;MTMR3;FECH;NDUFB10;MAOB;NDUFB3;ATP5A1;ATP5J;UQCR10;LDHB;ATP5B;SGPL1;EXTL1;PNPO;ACSS1;COX10;NDUFA9;MDH1;NDUFA5;COQ6;COQ5;ALDH4A1;ALDH6A1;SUCLA2;GALM;ACO2
Citrate cycle (TCA cycle)_Homo sapiens_hsa00020	6/30	7.91736e-06	0.000210375	-1.25739	14.7699	SUCLA2;MDH1;ACO2;SDHA;SDHB;DLD
Propanoate metabolism_Homo sapiens_hsa00640	6/32	1.17539e-05	0.000273278	-1.37402	15.5969	LDHB;ALDH6A1;SUCLA2;ACADM;ACSS1;DLD
Carbon metabolism_Homo sapiens_hsa01200	10/113	1.71207e-05	0.000353827	-1.50526	16.5205	ALDH6A1;SUCLA2;MDH1;GPT2;ACADM;ACO2;ACSS1;SDHA;SDHB;DLD
Valine, leucine and isoleucine degradation_Homo sapiens_hsa00280	7/48	0.00012768	0.00237485	-1.57465	14.1182	ACAD8;ALDH6A1;MCCC1;ACADM;DLD;BCAT2
2-Oxocarboxylic acid metabolism_Homo sapiens_hsa01210	3/17	0.00250577	0.0423703	-0.509783	3.05317	GPT2;ACO2;BCAT2

## Sheet: Older post-ECC
Term	Overlap	P-value	Adjusted P-value	Z-score	Combined Score	Genes
Up-regulated in older muscle 5 h post-ECC exercise:
Adherens junction_Homo sapiens_hsa04520	8/74	0.00521266	0.0451764	-0.996562	5.2386	TJP1;PTPN1;YES1;ACTN2;ACTN1;IQGAP1;SORBS1;FGFR1
Prostate cancer_Homo sapiens_hsa05215	9/89	0.00489186	0.0440267	-1.22438	6.5139	GSK3B;CDKN1A;MDM2;PDGFB;E2F3;TP53;CREB5;FGFR1;NKX3-1
Tight junction_Homo sapiens_hsa04530	12/139	0.00467086	0.0440267	-1.14952	6.16881	PPP2CA;TJP1;PPP2CB;YES1;PPP2R1B;CDK4;ACTN2;ACTN1;RRAS2;MYH9;AMOTL1;MYL12A
Chronic myeloid leukemia_Homo sapiens_hsa05220	8/73	0.00479741	0.0440267	-1.15172	6.14984	CDKN1A;TGFB2;CDK4;MYC;MDM2;E2F3;TP53;RUNX1
Measles_Homo sapiens_hsa05162	12/136	0.00391904	0.039872	-1.30313	7.22185	GSK3B;HSPA1L;IFNGR1;CDK4;EIF2AK3;MSN;TNFAIP3;TNFRSF10B;JAK2;TP53;HSPA1B;HSPA1A
Small cell lung cancer_Homo sapiens_hsa05222	9/86	0.00389295	0.039872	-1.23017	6.82571	COL4A2;COL4A1;CDK4;MYC;ITGAV;E2F3;LAMC1;TRAF1;TP53
Spliceosome_Homo sapiens_hsa03040	12/134	0.00347428	0.0387135	-1.30362	7.3816	DDX5;HSPA1L;TRA2B;DHX15;HNRNPU;SRSF5;SRSF6;SRSF7;SRSF10;HSPA1B;SRSF8;HSPA1A
p53 signaling pathway_Homo sapiens_hsa04115	8/69	0.00338407	0.0387135	-1.11381	6.33612	CDKN1A;GADD45B;GADD45A;CDK4;MDM2;TNFRSF10B;THBS1;TP53
Osteoclast differentiation_Homo sapiens_hsa04380	12/132	0.00307117	0.0378239	-1.39827	8.08999	CYLD;TGFB2;JUND;CSF1;IL1R1;IFNGR1;FHL2;FOS;JUNB;MAP3K14;RELB;NFKB2
Cell cycle_Homo sapiens_hsa04110	12/124	0.00181862	0.023642	-1.30344	8.2243	GSK3B;CDKN1A;TGFB2;WEE1;GADD45B;YWHAQ;GADD45A;CDK4;MYC;MDM2;E2F3;TP53
MicroRNAs in cancer_Homo sapiens_hsa05206	22/297	0.00126027	0.0173473	-1.52213	10.1624	CDKN1A;TGFB2;ABCC1;TNC;PDGFB;IRS2;THBS1;SLC7A1;SIRT1;VEGFA;BCL2L11;PLAU;MYC;MDM2;PIM1;HMOX1;CYP1B1;E2F3;TP53;CD44;SOX4;TP63
HIF-1 signaling pathway_Homo sapiens_hsa04066	11/103	0.0012572	0.0173473	-1.43983	9.61646	EGLN1;CDKN1A;EGLN3;ANGPT2;IFNGR1;HMOX1;TEK;TIMP1;EIF4E;IL6R;VEGFA
AGE-RAGE signaling pathway in diabetic complications_Homo sapiens_hsa04933	11/101	0.00106909	0.016995	-1.69029	11.5632	THBD;EGR1;DIAPH1;TGFB2;COL4A2;COL4A1;CDK4;PIM1;JAK2;ICAM1;VEGFA
FoxO signaling pathway_Homo sapiens_hsa04068	13/133	0.00108942	0.016995	-1.47046	10.0316	CDKN1A;TGFB2;GABARAPL1;GADD45B;GADD45A;HOMER2;PLK2;PRKAG2;IRS2;SIRT1;BCL2L11;MDM2;SGK1
Pathways in cancer_Homo sapiens_hsa05200	28/397	0.000640191	0.0115234	-1.78946	13.1592	PTGER4;GSK3B;CDKN1A;PDGFB;LAMC1;RASSF5;MYC;ITGAV;E2F3;NKX3-1;EGLN1;TGFB2;EGLN3;ARHGEF12;DAPK3;TRAF1;FOS;GNG12;RUNX1;VEGFA;NFKB2;COL4A2;COL4A1;CDK4;RARA;MDM2;TP53;FGFR1
TNF signaling pathway_Homo sapiens_hsa04668	12/110	0.000634734	0.0115234	-1.61848	11.9157	MAP2K3;JAG1;CSF1;BCL3;TNFAIP3;TRAF1;FOS;TNFRSF1B;JUNB;MAP3K14;CREB5;ICAM1
Regulation of actin cytoskeleton_Homo sapiens_hsa04810	19/214	0.000302868	0.00644283	-1.67359	13.5598	CYFIP1;ARHGEF12;ACTN2;ACTN1;PDGFB;RRAS2;MSN;IQGAP1;GNG12;MYL12A;SLC9A1;ENAH;DIAPH1;MYH9;ITGAV;PAK2;BCAR1;PFN2;FGFR1
HTLV-I infection_Homo sapiens_hsa05166	22/258	0.000187377	0.00438462	-1.71818	14.7461	ATF1;IL15RA;NRP1;GSK3B;EGR1;CDKN1A;TGFB2;IL1R1;PDGFB;RRAS2;FOS;ETS2;RELB;ICAM1;NFKB2;CDK4;MYC;E2F3;SLC25A5;MAP3K14;TP53;ATF3
AMPK signaling pathway_Homo sapiens_hsa04152	14/124	0.000160852	0.00418216	-1.58752	13.867	CPT1A;PRKAG2;PPP2R5A;IRS2;SIRT1;PPP2CA;LIPE;PPP2CB;PPP2R1B;RHEB;SCD;FASN;PPARGC1A;CREB5
Focal adhesion_Homo sapiens_hsa04510	20/202	4.7436e-05	0.00140154	-1.77113	17.6336	GSK3B;ACTN2;ACTN1;TNC;PDGFB;LAMC1;THBS1;MYL12A;VEGFA;RAP1B;DIAPH1;COL4A2;COL4A1;KDR;ZYX;ITGAV;FLNB;FLNC;PAK2;BCAR1
TGF-beta signaling pathway_Homo sapiens_hsa04350	10/84	4.79159e-05	0.00140154	-1.6624	16.5344	PPP2CA;TGIF1;SMAD1;PPP2CB;TGFB2;PPP2R1B;SMURF2;FST;MYC;THBS1;BMP6;BMPR1A
Transcriptional misregulation in cancer_Homo sapiens_hsa05202	19/180	3.02325e-05	0.00117907	-1.63196	16.9832	ATF1;SMAD1;CDKN1A;DDX5;FUS;DOT1L;JMJD1C;TRAF1;ETV5;DUSP6;RUNX1;NR4A3;EWSR1;PLAU;MYC;RARA;BMP2K;MDM2;TP53
Proteoglycans in cancer_Homo sapiens_hsa05205	22/203	4.76914e-06	0.000223196	-1.9098	23.4015	CDKN1A;TGFB2;DDX5;ARHGEF12;SDC4;RRAS2;MSN;IQGAP1;THBS1;SLC9A1;VEGFA;PLAU;MYC;KDR;MDM2;ITGAV;FLNB;FLNC;TP53;CD44;FGFR1;HBEGF
Epstein-Barr virus infection_Homo sapiens_hsa05169	24/202	3.34595e-07	1.95738e-05	-1.87394	27.9411	MAP2K3;GSK3B;CDKN1A;PSMD12;HSPA1L;EIF2AK3;HSPB1;TNFAIP3;TRAF1;RELB;ICAM1;NFKB2;POLR2A;YWHAQ;NEDD4;MYC;POLR1C;MDM2;CD58;MAP3K14;TP53;CD44;HSPA1B;HSPA1A
PI3K-Akt signaling pathway_Homo sapiens_hsa04151	34/341	1.02023e-07	1.18495e-05	-2.04111	32.858	PHLPP2;GSK3B;CDKN1A;CSF1;TNC;PDGFB;LAMC1;THBS1;PPP2CA;PPP2CB;BCL2L11;PPP2R1B;YWHAQ;MYC;KDR;ITGAV;JAK2;EIF4E;IL6R;ANGPT2;PPP2R5A;GNG12;OSMR;VEGFA;COL4A2;RHEB;COL4A1;CDK4;MDM2;TEK;SGK1;TP53;CREB5;FGFR1
Bladder cancer_Homo sapiens_hsa05219	11/41	1.51917e-07	1.18495e-05	-1.81666	28.5215	CDKN1A;CDK4;MYC;DAPK3;MDM2;E2F3;THBS1;TP53;TYMP;VEGFA;HBEGF
MAPK signaling pathway_Homo sapiens_hsa04010	30/255	1.4546e-08	3.40377e-06	-1.99779	36.052	PDGFB;HSPB1;DUSP16;RELB;RAP1B;DUSP10;MYC;FLNB;FLNC;PAK2;MAP4K3;MAP2K3;TGFB2;JUND;GADD45B;HSPA1L;IL1R1;GADD45A;RRAS2;FOS;GNG12;DUSP8;DUSP6;NFKB2;PPM1B;MAP3K14;TP53;HSPA1B;FGFR1;HSPA1A
Down-regulated in older muscle 5 h post-ECC exercise:
No enriched KEGG pathway terms identified

## Sheet: Young CON vs. ECC
Term	Overlap	P-value	Adjusted P-value	Z-score	Combined Score	Genes
Up-regulated in young muscle 5 h post-CON and post-ECC exercise:
Unique CON:
MAPK signaling pathway_Homo sapiens_hsa04010	1/255	0.0377662	0.0377662	-1.99779	6.54543	DUSP4
Unique ECC:
No enriched KEGG pathway terms identified
Common to CON and ECC:
MAPK signaling pathway_Homo sapiens_hsa04010	13/255	3.01793e-06	0.000500976
HTLV-I infection_Homo sapiens_hsa05166	12/258	1.83126e-05	0.00151994
Epstein-Barr virus infection_Homo sapiens_hsa05169	10/202	5.4617e-05	0.00302214
TGF-beta signaling pathway_Homo sapiens_hsa04350	6/84	0.000250162	0.0103817
Bladder cancer_Homo sapiens_hsa05219	4/41	0.000866857	0.0287796
Proteoglycans in cancer_Homo sapiens_hsa05205	8/203	0.001362	0.03291
Jak-STAT signaling pathway_Homo sapiens_hsa04630	7/158	0.00138777	0.03291
Down-regulated in young muscle 5 h post-CON and post-ECC exercise:
Unique CON:
No enriched KEGG pathway terms identified
Unique ECC:
No enriched KEGG pathway terms identified
Common to CON and ECC:
No enriched KEGG pathway terms identified

## Sheet: Older CON vs. ECC
Term	Overlap	P-value	Adjusted P-value	Z-score	Combined Score	Genes
Up-regulated in older muscle 5 h post-CON and post-ECC exercise:
Unique CON:
AGE-RAGE signaling pathway in diabetic complications_Homo sapiens_hsa04933	4/101	0.000327478	0.0163739	-2.06221	16.5474
Unique ECC:
Longevity regulating pathway - multiple species_Homo sapiens_hsa04213	4/64	8.33194e-05	0.0077487	-2.01796	18.9544	HSPA1L;IRS2;CRYAB;SIRT1
Common to CON and ECC:
Proteoglycans in cancer_Homo sapiens_hsa05205	16/203	1.15322e-07	2.19111e-05	-2.01334	32.1641	CDKN1A;TGFB2;DDX5;ARHGEF12;SDC4;MSN;IQGAP1;PLAU;MYC;KDR;MDM2;FLNB;FLNC;TP53;CD44;HBEGF
PI3K-Akt signaling pathway_Homo sapiens_hsa04151	19/341	1.65886e-06	0.000157592	-2.04111	27.1659	CDKN1A;ANGPT2;CSF1;TNC;PPP2R5A;LAMC1;OSMR;COL4A2;PPP2R1B;YWHAQ;RHEB;COL4A1;MYC;KDR;MDM2;TEK;SGK1;TP53;IL6R
Bladder cancer_Homo sapiens_hsa05219	7/41	2.81298e-06	0.000178156	-1.81666	23.2192	CDKN1A;MYC;DAPK3;MDM2;TP53;TYMP;HBEGF
Epstein-Barr virus infection_Homo sapiens_hsa05169	13/202	1.65077e-05	0.000784118	-1.87394	20.6352	MAP2K3;CDKN1A;EIF2AK3;TNFAIP3;RELB;NFKB2;YWHAQ;NEDD4;MYC;MDM2;MAP3K14;TP53;CD44
Transcriptional misregulation in cancer_Homo sapiens_hsa05202	11/180	0.000116985	0.00444544	-1.65552	14.9882	CDKN1A;DDX5;NR4A3;PLAU;MYC;DOT1L;RARA;MDM2;TP53;ETV5;RUNX1
Protein digestion and absorption_Homo sapiens_hsa04974	7/90	0.000490519	0.0155331	-1.57028	11.9656	SLC36A1;COL4A2;COL4A1;ELN;COL5A3;SLC3A2;ATP1A1
MAPK signaling pathway_Homo sapiens_hsa04010	12/255	0.000645972	0.0161677	-1.84503	13.5513	MAP2K3;TGFB2;IL1R1;GADD45A;MYC;FLNB;FLNC;DUSP8;MAP3K14;TP53;RELB;NFKB2
HTLV-I infection_Homo sapiens_hsa05166	12/258	0.000715791	0.0161677	-1.76814	12.8051	NRP1;EGR1;CDKN1A;TGFB2;IL1R1;MYC;SLC25A5;MAP3K14;TP53;ETS2;RELB;NFKB2
MicroRNAs in cancer_Homo sapiens_hsa05206	13/297	0.000765836	0.0161677	-1.7154	12.3072	CDKN1A;TGFB2;TNC;SLC7A1;PLAU;MYC;MDM2;HMOX1;CYP1B1;TP53;CD44;SOX4;TP63
Chronic myeloid leukemia_Homo sapiens_hsa05220	6/73	0.000925552	0.0175855	-1.64294	11.4761	CDKN1A;TGFB2;MYC;MDM2;TP53;RUNX1
Focal adhesion_Homo sapiens_hsa04510	10/202	0.00122938	0.0212348	-1.67055	11.1948	DIAPH1;COL4A2;COL4A1;ACTN1;KDR;TNC;FLNB;FLNC;LAMC1;BCAR1
ECM-receptor interaction_Homo sapiens_hsa04512	6/82	0.00169617	0.026856	-1.37832	8.79284	SDC4;COL4A2;COL4A1;TNC;LAMC1;CD44
AMPK signaling pathway_Homo sapiens_hsa04152	7/124	0.00317192	0.0406282	-1.48515	8.5447	CPT1A;PPP2R1B;RHEB;FASN;PRKAG2;PPP2R5A;PPARGC1A
Cell cycle_Homo sapiens_hsa04110	7/124	0.00317192	0.0406282	-1.40456	8.08103	CDKN1A;TGFB2;YWHAQ;GADD45A;MYC;MDM2;TP53
NF-kappa B signaling pathway_Homo sapiens_hsa04064	7/93	0.00320749	0.0406282	-1.36924	7.86252	IL1R1;PLAU;TNFAIP3;MAP3K14;RELB;NFKB2
Amoebiasis_Homo sapiens_hsa05146	6/100	0.00458747	0.0466411	-1.3963	7.51826	TGFB2;COL4A2;IL1R1;COL4A1;ACTN1;LAMC1
FoxO signaling pathway_Homo sapiens_hsa04068	7/133	0.00466411	0.0466411	-1.3688	7.34753	CDKN1A;TGFB2;GABARAPL1;GADD45A;MDM2;PRKAG2;SGK1
Adipocytokine signaling pathway_Homo sapiens_hsa04920	5/70	0.0045467	0.0466411	-1.28615	6.93669	CPT1A;PRKAG2;ACSL3;TNFRSF1B;PPARGC1A
p53 signaling pathway_Homo sapiens_hsa04115	5/69	0.00427486	0.0466411	-1.25238	6.83176	CDKN1A;GADD45A;MDM2;TNFRSF10B;TP53
Down-regulated in older muscle 5 h post-CON and post-ECC exercise:
Unique CON:
No enriched KEGG pathway terms identified
Unique ECC:
Fanconi anemia pathway_Homo sapiens_hsa03460	1/53	0.0105587	0.0137298	-1.79893	8.18657	FANCE
p53 signaling pathway_Homo sapiens_hsa04115	1/69	0.0137298	0.0137298	-1.73739	7.45024	STEAP3
Common to CON and ECC:
No enriched KEGG pathway terms identified

## Sheet: Young CON vs. Older CON
Term	Overlap	P-value	Adjusted P-value	Z-score	Combined Score	Genes
Up-regulated 5 h post-CON in young and older muscle:
Unique young:
No enriched KEGG pathway terms identified
Unique elderly:
AGE-RAGE signaling pathway in diabetic complications_Homo sapiens_hsa04933	6/101	0.000101615	0.00594448	-2.0336	18.6976	COL3A1;VCAM1;COL1A2;COL4A3;BAX;PLCE1
Protein digestion and absorption_Homo sapiens_hsa04974	6/90	5.33353e-05	0.00594448	-1.71978	16.9208	COL3A1;COL1A2;COL5A1;COL5A3;COL4A3;PRCP
ECM-receptor interaction_Homo sapiens_hsa04512	5/82	0.000346934	0.0135304	-1.65176	13.1585	COL1A2;ITGA3;COL4A3;ITGA1;TNC
Common to young and elderly:
HTLV-I infection_Homo sapiens_hsa05166	8/258	0.000452694	0.0255431	-1.91802	14.7693	EGR1;CDKN1A;TGFB2;IL1R1;MYC;MAP3K14;ETS2;NFKB2
FoxO signaling pathway_Homo sapiens_hsa04068	6/133	0.000336592	0.0255431	-1.82626	14.6039	CDKN1A;TGFB2;GABARAPL1;GADD45A;PRKAG2;SGK1
Epstein-Barr virus infection_Homo sapiens_hsa05169	7/202	0.000535869	0.0255431	-1.89864	14.2998	CDKN1A;NEDD4;MYC;EIF2AK3;TNFAIP3;MAP3K14;NFKB2
Jak-STAT signaling pathway_Homo sapiens_hsa04630	6/158	0.000836678	0.0299112	-1.85448	13.141	CDKN1A;MYC;SOCS6;SOCS7;IL6R;IL12RB2
Circadian rhythm_Homo sapiens_hsa04710	3/30	0.00116249	0.0332473	-1.65801	11.2035	CRY1;PRKAG2;ARNTL
Adipocytokine signaling pathway_Homo sapiens_hsa04920	4/70	0.00143621	0.0342297	-1.65687	10.8454	PRKAG2;ACSL3;TNFRSF1B;PPARGC1A
MAPK signaling pathway_Homo sapiens_hsa04010	7/255	0.00206727	0.0422315	-1.84503	11.4051	TGFB2;IL1R1;GADD45A;MYC;DUSP8;MAP3K14;NFKB2
Down-regulated 5 h post-CON in young and older muscle:
Unique young:
Neuroactive ligand-receptor interaction_Homo sapiens_hsa04080	1/277	0.0275089	0.0275089	-1.89338	6.8034	GLRB
Unique elderly:
Valine, leucine and isoleucine degradation_Homo sapiens_hsa00280	2/48	0.00204879	0.0379026	-1.97315	12.2148	ALDH6A1;BCAT2
Cysteine and methionine metabolism_Homo sapiens_hsa00270	2/45	0.00180281	0.0379026	-1.9119	12.0802	TST;BCAT2
Common to young and elderly:
No enriched KEGG pathway terms identified

## Sheet: Young ECC vs. Older ECC
Term	Overlap	P-value	Adjusted P-value	Z-score	Combined Score	Genes
Up-regulated 5 h post-ECC in young and older muscle:
Unique young:
MAPK signaling pathway_Homo sapiens_hsa04010	6/255	0.000591394	0.0484943	-1.99779	14.8496	NR4A1;MRAS;MAPKAPK3;DDIT3;RAPGEF2;MAP3K8
Unique elderly:
No enriched KEGG pathway terms identified
Common to young and elderly:
MAPK signaling pathway_Homo sapiens_hsa04010	21/255	5.90202e-08	1.20401e-05	-1.99779	33.254	MAP2K3;TGFB2;JUND;GADD45B;HSPA1L;IL1R1;GADD45A;HSPB1;RRAS2;FOS;DUSP8;DUSP16;NFKB2;DUSP10;MYC;FLNC;MAP3K14;TP53;HSPA1B;FGFR1;HSPA1A
Epstein-Barr virus infection_Homo sapiens_hsa05169	17/202	8.02124e-07	8.18167e-05	-1.92334	26.996	MAP2K3;CDKN1A;PSMD12;HSPA1L;EIF2AK3;HSPB1;TNFAIP3;NFKB2;YWHAQ;NEDD4;MYC;POLR1C;MAP3K14;TP53;CD44;HSPA1B;HSPA1A
Bladder cancer_Homo sapiens_hsa05219	8/41	1.3789e-06	9.37653e-05	-1.81666	24.5144	CDKN1A;CDK4;MYC;DAPK3;E2F3;TP53;VEGFA;HBEGF
PI3K-Akt signaling pathway_Homo sapiens_hsa04151	19/341	7.15815e-05	0.00241958	-1.96333	18.7394	CDKN1A;ANGPT2;PPP2R5A;LAMC1;OSMR;VEGFA;PPP2CA;PPP2CB;PPP2R1B;YWHAQ;CDK4;MYC;ITGAV;SGK1;JAK2;EIF4E;TP53;IL6R;FGFR1
Proteoglycans in cancer_Homo sapiens_hsa05205	14/203	6.9452e-05	0.00241958	-1.93569	18.534	CDKN1A;TGFB2;SDC4;RRAS2;MSN;VEGFA;PLAU;MYC;ITGAV;FLNC;TP53;CD44;FGFR1;HBEGF
HTLV-I infection_Homo sapiens_hsa05166	16/258	7.68129e-05	0.00241958	-1.8181	17.2249	ATF1;EGR1;CDKN1A;TGFB2;IL1R1;RRAS2;FOS;ETS2;NFKB2;CDK4;MYC;E2F3;SLC25A5;MAP3K14;TP53;ATF3
FoxO signaling pathway_Homo sapiens_hsa04068	11/133	8.30248e-05	0.00241958	-1.67377	15.7274	CDKN1A;TGFB2;GABARAPL1;GADD45B;GADD45A;HOMER2;PLK2;PRKAG2;IRS2;SGK1;SIRT1
Cell cycle_Homo sapiens_hsa04110	10/124	0.000213565	0.00544592	-1.55624	13.1527	CDKN1A;TGFB2;WEE1;GADD45B;YWHAQ;GADD45A;CDK4;MYC;E2F3;TP53
Longevity regulating pathway - multiple species_Homo sapiens_hsa04213	7/64	0.000300387	0.00680878	-1.71439	13.9045	HSPA1L;PRKAG2;IRS2;CRYAB;SIRT1;HSPA1B;HSPA1A
Prion diseases_Homo sapiens_hsa05020	5/35	0.00064648	0.0131882	-1.3325	9.78587	PRNP;EGR1;HSPA5;LAMC1;HSPA1A
AGE-RAGE signaling pathway in diabetic complications_Homo sapiens_hsa04933	8/101	0.00101843	0.0188872	-1.77612	12.2366	THBD;EGR1;DIAPH1;TGFB2;CDK4;PIM1;JAK2;VEGFA
Transcriptional misregulation in cancer_Homo sapiens_hsa05202	11/180	0.00111887	0.0190208	-1.49063	10.1295	ATF1;CDKN1A;NR4A3;PLAU;MYC;DOT1L;RARA;BMP2K;JMJD1C;TP53;ETV5
Measles_Homo sapiens_hsa05162	9/136	0.00179956	0.0282392	-1.55538	9.83035	HSPA1L;CDK4;EIF2AK3;MSN;TNFAIP3;JAK2;TP53;HSPA1B;HSPA1A
Adipocytokine signaling pathway_Homo sapiens_hsa04920	6/70	0.00288933	0.0421017	-1.38726	8.11092	PRKAG2;IRS2;ACSL3;TNFRSF1B;JAK2;PPARGC1A
Pathways in cancer_Homo sapiens_hsa05200	17/397	0.00311543	0.0423698	-1.73607	10.0195	CDKN1A;TGFB2;EGLN3;DAPK3;LAMC1;FOS;VEGFA;NFKB2;CDK4;RASSF5;MYC;RARA;ITGAV;E2F3;TP53;FGFR1;NKX3-1
Chronic myeloid leukemia_Homo sapiens_hsa05220	6/73	0.00356686	0.0446623	-1.44645	8.15231	CDKN1A;TGFB2;CDK4;MYC;E2F3;TP53
AMPK signaling pathway_Homo sapiens_hsa04152	8/124	0.00372186	0.0446623	-1.38278	7.73464	PPP2CA;PPP2CB;PPP2R1B;PRKAG2;PPP2R5A;IRS2;PPARGC1A;SIRT1
Down-regulated 5 h post-ECC in young and older muscle:
Unique young:
No enriched KEGG pathway terms identified
Unique elderly:
No enriched KEGG pathway terms identified
Common to young and elderly:
No enriched KEGG pathway terms identified
